# Supplementary material for: Bacterial cell cycle control by citrate synthase independent of enzymatic activity
Source: eLife. 2020 Mar 9;9:e52272. doi: 10.7554/eLife.52272 (PMC7083601; doi:10.7554/eLife.52272)
Supplement: Figure 1—source data 1. — The first sheet shows insertion ratios across the genome per coding sequence (CDS) and the second sheet shows the data per 100 bp window. [file elife-52272-fig1-data1.xlsx]

## Sheet: CDS
				Tn insertion				ratio to the WT
CDS	CDS start	CDS stop	orientation	WT	∆cpdR	∆tipN	∆tipN; ∆cpdR	WT	∆cpdR	∆tipN	∆tipN; ∆cpdR
CC_0001	252	1057	+	110.098	59.3523	64.0842	3.47373	1	0.539088	0.582067	0.0315513
CC_0002	1154	1653	+	71.5284	84.3881	99.1302	70.0535	1	1.17979	1.38589	0.97938
CC_0003	1750	2507	+	143.933	227.049	124.831	189.511	1	1.57746	0.867281	1.31666
CC_0004	2609	3108	+	1382.18	2234.88	943.74	615.428	1	1.61692	0.68279	0.445259
dnaQ	3240	3853	+	14.3758	9.71219	7.34298	1.54388	1	0.675593	0.510787	0.107394
CC_0006	4072	4760	+	14.3758	15.3237	22.3627	51.334	1	1.06594	1.55558	3.57086
CC_0007	4995	5185	+	0.175315	0	0.333772	1.15791	1	0	1.90384	6.60474
dnaA	5686	7058	+	1.2272	0.431653	1.00132	0.578954	1	0.351737	0.815933	0.471767
alkB	7220	7740	-	50.4906	133.597	112.147	20.0704	1	2.64597	2.22115	0.397508
dnaK	8215	10010	+	27.5244	25.4675	109.811	3.47373	1	0.92527	3.98958	0.126205
dnaJ	10273	11330	+	16.4796	10.3597	13.5178	7.52641	1	0.628637	0.820273	0.456711
mutS	11517	14128	+	245.441	191.87	217.786	94.5625	1	0.781736	0.887327	0.385277
CC_0013	14249	16971	+	11.5708	57.8415	47.8963	33.5793	1	4.99893	4.13942	2.90208
moaC	17068	17444	-	20.5118	19.4244	45.8936	28.7547	1	0.946985	2.23742	1.40186
moaB	17541	17992	-	16.1289	5.39566	9.01184	0.38597	1	0.334533	0.558737	0.0239302
moaE	18093	18445	-	66.269	18.5611	8.01052	4.24566	1	0.280087	0.120879	0.0640672
moaD	18542	18681	-	0.525944	0.215826	0	0.192985	1	0.41036	0	0.36693
moaA	18785	19734	-	68.3727	131.438	75.7662	26.8249	1	1.92238	1.10813	0.392333
CC_0019	19865	20397	+	33.3098	56.9782	77.9357	75.843	1	1.71055	2.33972	2.2769
CC_0020	20494	20618	-	17.5315	21.3668	10.3469	0.964924	1	1.21877	0.590192	0.0550395
CC_0021	20890	22982	-	131.661	132.086	222.292	293.723	1	1.00322	1.68836	2.2309
CC_0022	23079	23509	-	21.739	34.3164	151.532	31.0705	1	1.57856	6.97053	1.42925
CC_0023	23654	24024	+	38.7445	32.1581	64.2511	64.0709	1	0.830004	1.65833	1.65368
CC_0024	24141	24931	+	23.8428	19.4244	13.6846	38.211	1	0.814685	0.573953	1.60262
CC_0025	25041	26593	-	140.076	304.315	196.425	377.478	1	2.17249	1.40227	2.6948
CC_0026	26751	29353	-	551.189	1020	791.874	484.006	1	1.85054	1.43666	0.878112
CC_0027	29552	30141	-	28.7516	101.223	34.8792	71.4044	1	3.52059	1.21312	2.48349
CC_0028	30387	32842	-	431.099	286.833	569.415	354.32	1	0.665354	1.32085	0.8219
CC_0029	32964	33496	+	42.2508	59.1364	61.414	22.5792	1	1.39965	1.45356	0.534409
CC_0030	33645	34279	+	81.5213	23.9567	75.9331	40.1408	1	0.293871	0.931451	0.492397
vapC	34362	34648	-	28.9269	31.7265	62.7491	173.493	1	1.09678	2.16923	5.99764
vapB	34749	34891	-	2.98035	43.5969	21.6952	15.2458	1	14.6281	7.2794	5.11544
CC_0034	35874	37912	-	4.20755	6.47479	5.67412	6.56148	1	1.53885	1.34856	1.55945
CC_0035	38261	38430	-	0.701259	0	0	0	1	0	0	0
CC_0036	38545	39377	-	25.9466	21.151	48.5638	104.598	1	0.815175	1.87168	4.03127
CC_0037	39480	39829	-	12.6227	21.3668	39.2182	13.3159	1	1.69274	3.10697	1.05492
CC_0038	40030	40718	-	17.7068	29.784	13.5178	5.59656	1	1.68207	0.763423	0.316069
CC_0039	40878	41353	-	42.0755	24.82	74.7649	19.1055	1	0.589893	1.77692	0.454076
CC_0040	41453	41871	-	18.934	35.8272	36.0474	17.7546	1	1.89222	1.90384	0.937711
CC_0041	42010	42479	-	56.1007	154.748	181.071	78.9308	1	2.75839	3.22761	1.40695
CC_0042	42635	45648	-	16.6549	11.223	7.00921	11.7721	1	0.673854	0.42085	0.706824
CC_0043	45943	46493	-	1.2272	1.72661	2.16952	0.192985	1	1.40695	1.76785	0.157256
CC_0044	46672	48218	-	154.978	255.538	131.506	81.4396	1	1.64887	0.848546	0.525491
CC_0045	48321	48796	-	6.83727	10.1438	20.6939	39.5619	1	1.48361	3.02662	5.78621
CC_0047	49155	49588	+	1.92846	6.69062	6.50855	13.8949	1	3.46941	3.375	7.20518
CC_0048	49695	49981	-	15.2524	10.3597	34.3785	39.3689	1	0.679217	2.25398	2.58116
CC_0049	50182	50762	-	9.29168	11.223	27.8699	1.73686	1	1.20785	2.99945	0.186927
metK	50952	52075	-	9.99294	3.88488	30.3732	9.84222	1	0.388762	3.03947	0.984918
hipB	52295	52629	-	19.4599	3.2374	31.2077	10.8071	1	0.166362	1.60369	0.555354
CC_0052	52757	54249	-	58.0292	76.8342	24.1985	2.5088	1	1.32406	0.417005	0.0432335
corC	54346	55172	-	174.613	49.4243	58.0763	69.6675	1	0.28305	0.332599	0.398981
CC_0054	55281	55561	-	1.92846	2.37409	1.33509	0.578954	1	1.23108	0.692307	0.300216
phoH	55774	56618	-	91.5143	92.8054	109.811	72.1763	1	1.01411	1.19993	0.788689
CC_0056	56715	57961	-	103.962	167.697	136.012	166.16	1	1.61307	1.30829	1.59828
CC_0057	58251	58558	-	6.66196	2.15826	12.3496	0.38597	1	0.323968	1.85374	0.0579364
CC_0058	58704	59056	-	25.5959	12.5179	53.2366	32.0355	1	0.489059	2.07988	1.25158
CC_0059	59165	59700	-	6.31133	19.6402	12.5164	107.493	1	3.1119	1.98317	17.0317
CC_0060	59804	60336	-	117.461	111.151	65.9199	103.247	1	0.946278	0.561208	0.87899
CC_0061	60584	61071	-	26.6478	42.7336	48.8976	32.8074	1	1.60364	1.83495	1.23115
CC_0062	61241	61713	-	0.350629	0	2.16952	0.192985	1	0	6.18749	0.550395
CC_0063	61899	63103	+	469.317	747.839	459.938	220.389	1	1.59346	0.980014	0.469594
trpS	63377	64311	-	3.68161	7.76975	11.3482	2.12283	1	2.11042	3.08241	0.576605
mviN	64579	66041	-	931.622	1631.65	589.608	393.496	1	1.7514	0.632883	0.422377
CC_0066	66381	68077	-	89.0599	109.208	228.467	101.703	1	1.22623	2.56532	1.14196
CC_0067	68339	69012	-	49.0881	57.8415	129.337	56.5445	1	1.17832	2.63478	1.1519
CC_0068	69170	69438	-	2.62972	29.9999	12.8502	36.0882	1	11.408	4.88653	13.7232
CC_0069	69543	69724	-	2.62972	77.2659	2.83706	34.1583	1	29.3818	1.07884	12.9893
gpsA	69844	70754	-	0.876573	1.07913	0.333772	0	1	1.23108	0.380769	0
CC_0071	70851	71854	-	2.80503	4.96401	8.3443	3.28074	1	1.76968	2.97476	1.16959
CC_0072	72027	72895	+	0.350629	0	0.500658	0	1	0	1.42788	0
CC_0073	73000	73586	+	0.525944	0.215826	0.166886	0	1	0.41036	0.317307	0
CC_0074	73712	74526	+	2.10378	8.63306	9.5125	31.4565	1	4.1036	4.52163	14.9524
CC_0075	74623	76058	+	77.1385	53.9566	36.0474	107.686	1	0.699477	0.467307	1.396
CC_0076	76527	78628	-	128.155	149.136	335.441	53.8428	1	1.16372	2.61746	0.420138
CC_0077	78753	79858	-	66.269	58.489	47.5625	62.913	1	0.8826	0.717719	0.949359
CC_0078	80025	80308	-	41.0236	35.1797	39.2182	27.5968	1	0.857547	0.95599	0.672705
CC_0079	80405	81480	-	144.985	60.6472	51.9015	156.897	1	0.418299	0.357978	1.08216
CC_0080	81583	83276	-	284.01	153.237	246.824	178.704	1	0.539547	0.869069	0.629217
CC_0081	83464	83843	-	36.2901	9.49636	9.67938	4.05268	1	0.261679	0.266722	0.111674
CC_0082	84137	84678	+	1.92846	1.94244	5.34035	0	1	1.00725	2.76923	0
CC_0083	84813	84922	-	0.876573	1.94244	0	43.4216	1	2.21594	0	49.5356
lysS	85272	86830	-	1.2272	2.80574	0.667544	0.192985	1	2.28629	0.543955	0.157256
CC_0085	87093	88633	-	68.1974	230.934	137.848	181.213	1	3.38626	2.0213	2.65718
purH	89103	90592	+	53.8216	69.9278	171.392	34.1583	1	1.29925	3.18444	0.634658
CC_0087	90705	91363	+	34.8876	37.9855	31.8752	22.0003	1	1.08879	0.913654	0.630604
CC_0088	91517	96240	-	29.9788	26.3308	16.3548	13.3159	1	0.878315	0.545546	0.444179
CC_0089	96678	97687	-	123.772	93.8845	118.99	122.931	1	0.758527	0.96136	0.993206
CC_0090	97885	99335	+	107.994	84.8198	137.514	141.265	1	0.785413	1.27335	1.30808
CC_0091	99516	101845	-	251.051	290.718	163.715	242.968	1	1.15801	0.65212	0.967804
CC_0092	102010	102893	-	110.974	80.5033	176.732	27.4038	1	0.725423	1.59255	0.246939
CC_0093	103199	103992	-	166.549	53.0933	92.4548	172.335	1	0.318785	0.555121	1.03474
CC_0094	104089	104879	-	36.6408	3.02157	37.8831	4.43865	1	0.0824647	1.03391	0.12114
105028,,105237	105078	105187	-	0.175315	0.431653	0.333772	16.0177	1	2.46216	1.90384	91.3656
CC_0095	105360	106180	-	58.9057	206.114	135.344	90.1239	1	3.49905	2.29765	1.52997
CC_0096	106384	107282	-	77.6644	87.6255	106.473	123.124	1	1.12826	1.37094	1.58534
CC_0097	107452	108230	+	73.8075	64.3163	148.362	48.4392	1	0.871406	2.01012	0.656291
CC_0098	108384	108742	+	20.6871	3.45322	32.0421	8.68431	1	0.166926	1.54889	0.419793
CC_0099	108993	109183	-	15.2524	4.96401	44.3916	62.1411	1	0.325458	2.91047	4.07419
fzlC	109289	110919	-	10.5189	7.55392	13.8515	2.31582	1	0.71813	1.31683	0.220158
CC_0101	111029	111588	-	1.92846	0.431653	0	0.771939	1	0.223833	0	0.400288
rsmB	111795	112984	-	23.3169	6.69062	18.1906	34.7373	1	0.286943	0.780147	1.48979
CC_0103	113147	113325	+	7.53853	4.96401	9.84627	5.78954	1	0.658485	1.30613	0.767993
CC_0104	113513	115110	+	317.67	259.639	472.621	234.284	1	0.817323	1.48777	0.737506
CC_0105	115339	115940	-	1.75315	3.2374	31.2077	0.192985	1	1.84662	17.8009	0.110079
CC_0106	116138	116736	+	34.537	42.0862	24.0316	189.897	1	1.21858	0.695821	5.49837
CC_0107	116884	118049	+	5.78538	1.29496	3.5046	5.40357	1	0.223833	0.605769	0.934004
CC_0108	118310	118407	-	0	3.45322	7.17609	0	#DIV/0!	#DIV/0!	#DIV/0!	#DIV/0!
CC_0109	118517	119094	-	52.7697	15.5395	75.7662	46.7023	1	0.294478	1.43579	0.885021
CC_0110	119210	120009	-	33.6604	9.92802	30.8739	43.8075	1	0.294946	0.917216	1.30146
CC_0111	120219	120625	-	63.6392	136.402	62.0816	33.7723	1	2.14337	0.975523	0.530684
CC_0112	120802	121448	+	41.1989	18.1294	30.3732	72.1763	1	0.440046	0.737233	1.7519
CC_0113	121553	121842	+	10.1683	11.6546	37.7162	13.7019	1	1.14618	3.70921	1.34752
CC_0114	122022	122494	+	9.29168	65.6112	7.50987	12.737	1	7.06129	0.808236	1.3708
CC_0115	122597	122802	+	6.48664	2.58992	9.17872	16.0177	1	0.399269	1.41502	2.46934
CC_0116	122971	126218	+	375.875	298.488	427.061	652.481	1	0.794116	1.13618	1.7359
CC_0117	126457	127703	-	4.38287	2.80574	10.6807	1.92985	1	0.640162	2.43692	0.440316
CC_0118	127965	129685	+	1.57783	3.2374	2.83706	0.964924	1	2.0518	1.79807	0.61155
CC_0119	129796	131939	+	233.87	209.567	294.721	238.722	1	0.896086	1.26019	1.02075
CC_0120	132027	132388	+	10.3436	40.7912	16.5217	64.6499	1	3.94363	1.59729	6.25025
CC_0121	132485	132903	+	45.9324	53.0933	36.548	9.07029	1	1.1559	0.79569	0.19747
CC_0122	133000	133358	-	8.41511	4.53235	21.0276	0.192985	1	0.538598	2.49879	0.0229331
CC_0123	133467	133777	-	18.0574	6.47479	10.18	9.45625	1	0.358567	0.56376	0.523677
CC_0124	133950	134632	+	54.3475	8.84888	54.4048	47.2813	1	0.16282	1.00105	0.86998
CC_0125	134876	135432	-	62.5873	121.726	139.85	15.8248	1	1.9449	2.23448	0.252843
CC_0126	135559	136127	-	4124.45	8240.9	4310.83	2058.76	1	1.99806	1.04519	0.49916
CC_0127	136234	136541	-	183.905	105.755	85.9462	52.2989	1	0.575052	0.46734	0.28438
CC_0128	136861	136961	+	68.8987	63.2371	30.2063	45.9304	1	0.917828	0.438417	0.666637
CC_0129	137296	138422	-	80.4694	89.1363	171.058	25.667	1	1.1077	2.12575	0.318965
CC_0130	138605	138867	-	9.64231	0.215826	1.1682	6.3685	1	0.0223833	0.121154	0.660474
CC_0131	138971	140868	-	10.6942	6.25897	6.84232	3.28074	1	0.585268	0.639816	0.306778
CC_0132	141169	141491	+	1.57783	5.82731	4.00526	16.0177	1	3.69324	2.53846	10.1517
hetN	141683	142383	+	72.2296	73.381	64.418	177.353	1	1.01594	0.891849	2.4554
CC_0134	142730	143844	+	49.7894	62.158	88.9502	153.423	1	1.24842	1.78653	3.08144
CC_0135	144039	144367	+	5.9607	0.215826	0.667544	0.192985	1	0.0362082	0.111991	0.0323762
CC_0136	144493	145226	+	28.0503	8.63306	16.8555	15.2458	1	0.30777	0.600901	0.543515
CC_0137	145323	146902	-	66.6196	36.043	50.2327	9.64924	1	0.541027	0.754022	0.144841
shkA	147036	148480	-	27.5244	16.4028	27.3693	75.0711	1	0.595937	0.994364	2.72744
CC_0139	148802	150894	+	158.134	209.352	260.676	372.654	1	1.32389	1.64845	2.35657
chlI	151043	152550	-	23.4922	3.66905	9.84627	12.544	1	0.156182	0.41913	0.533966
CC_0141	152759	153612	-	5.43476	4.1007	6.84232	0.964924	1	0.754533	1.25899	0.177547
CC_0142	153768	154483	-	39.6211	57.8415	36.8818	73.5272	1	1.45986	0.930862	1.85576
CC_0143	154585	154862	-	1.57783	0.647479	0.166886	0.38597	1	0.41036	0.105769	0.24462
CC_0144	154962	155734	-	37.342	49.6401	52.0684	31.8425	1	1.32934	1.39436	0.852725
CC_0145	155869	156923	-	62.7627	156.042	117.488	98.4222	1	2.48623	1.87194	1.56817
CC_0146	157016	157518	-	2.27909	7.12227	21.5283	42.0707	1	3.12505	9.44599	18.4594
CC_0147	157643	158136	+	35.7642	21.5826	14.8528	59.0533	1	0.603471	0.415299	1.65119
CC_0148	158380	158420	+	0.350629	17.6978	42.389	0	1	50.4743	120.894	0
CC_0149	158596	159029	+	16.4796	11.6546	19.1919	3.66671	1	0.707216	1.16459	0.2225
CC_0150	159146	159273	+	71.1778	97.5535	40.887	15.0528	1	1.37056	0.574436	0.211482
CC_0151	159370	160247	-	115.532	89.568	101.8	111.352	1	0.775263	0.881142	0.963818
CC_0152	160514	161130	-	20.5118	77.6975	51.0671	18.9125	1	3.78794	2.48964	0.92203
hrcA	161370	162346	+	204.242	191.654	254.167	243.547	1	0.938368	1.24444	1.19244
grpE	162459	162985	+	6.48664	3.2374	1.00132	0.192985	1	0.499087	0.154366	0.0297511
CC_0155	163025	163185	+	42.2508	19.2086	19.025	61.9481	1	0.454631	0.450287	1.4662
CC_0156	163463	164481	+	5.78538	3.45322	47.3956	44.7725	1	0.596887	8.1923	7.73889
CC_0157	164636	164901	+	10.5189	92.5895	11.1814	11.7721	1	8.80222	1.06298	1.11914
CC_0158	165072	165343	+	34.8876	30.8632	37.0487	148.791	1	0.884645	1.06194	4.26487
recF	165671	166734	+	72.2296	116.33	61.0802	58.2814	1	1.61056	0.845639	0.80689
gyrB	166879	169196	+	1.57783	17.2661	2.83706	6.17551	1	10.9429	1.79807	3.91392
CC_0161	169437	170476	+	144.635	128.633	170.224	22.3862	1	0.889362	1.17692	0.154778
CC_0162	171001	171527	+	11.5708	7.12227	9.67938	3.8597	1	0.61554	0.836537	0.333573
CC_0163	171699	172867	+	200.735	167.265	149.697	10.4212	1	0.833264	0.745742	0.051915
CC_0164	173014	175133	+	205.293	165.971	230.97	5.21059	1	0.808455	1.12507	0.0253812
CC_0165	175223	177048	+	189.515	154.963	273.526	46.3163	1	0.817683	1.44329	0.244394
pssY	177142	177845	-	144.284	125.827	199.262	184.493	1	0.872077	1.38104	1.27868
CC_0167	178302	179020	-	117.636	93.8845	113.482	82.0185	1	0.798092	0.96469	0.697222
CC_0168	179361	180070	+	138.499	54.1724	65.5862	45.3514	1	0.391141	0.473551	0.32745
CC_0169	180240	180751	+	150.069	43.8128	36.2142	9.84222	1	0.29195	0.241317	0.0655845
CC_0170	181429	182867	+	255.083	161.438	160.21	273.266	1	0.632885	0.628072	1.07129
CC_0171	183047	185613	+	612.549	345.106	724.619	719.254	1	0.563394	1.18296	1.1742
CC_0172	185903	186240	+	7.88916	6.69062	0.500658	0	1	0.848077	0.0634615	0
pulD	186337	188300	+	94.3193	37.7696	203.768	194.336	1	0.400444	2.1604	2.0604
pulE	188397	189772	+	93.4427	29.3524	113.149	129.107	1	0.314122	1.21089	1.38167
pulF	189859	190970	+	55.2241	31.7265	84.778	223.09	1	0.574504	1.53516	4.03973
CC_0176	191082	191434	+	39.6211	29.5682	30.3732	25.088	1	0.746274	0.766592	0.633198
CC_0177	191449	191906	+	35.4136	10.5755	82.9423	17.5616	1	0.298628	2.3421	0.495901
CC_0178	191975	192258	+	0.175315	0	0	10.0352	1	0	0	57.2411
CC_0179	192355	192845	+	76.7878	15.9712	122.828	173.493	1	0.207991	1.59958	2.25939
CC_0180	192942	193816	+	14.5511	19.2086	78.6033	40.5268	1	1.32007	5.40187	2.78513
CC_0181	193898	194904	+	56.9773	94.9636	101.133	85.6852	1	1.66669	1.77497	1.50385
CC_0182	195001	195377	+	1.57783	1.72661	1.33509	4.63163	1	1.09429	0.846153	2.93544
CC_0183	195474	196090	+	12.0967	2.15826	44.7254	17.9476	1	0.178417	3.69732	1.48367
pulO	196300	196961	-	8.06447	18.1294	12.8502	9.26327	1	2.24806	1.59343	1.14865
197070,,197267	197120	197217	-	58.5551	48.9926	60.2458	69.4745	1	0.836692	1.02887	1.18648
CC_0185	197335	199760	-	412.165	550.142	657.864	529.357	1	1.33476	1.59612	1.28433
CC_0186	200336	201552	-	127.98	134.46	123.662	131.809	1	1.05063	0.966266	1.02992
CC_0187	201649	202673	-	129.908	155.827	119.991	112.124	1	1.19951	0.92366	0.863103
CC_0188	202813	203717	-	195.301	79.4241	137.18	98.6152	1	0.406676	0.702406	0.504941
CC_0189	203919	204085	+	8.23979	37.1221	13.3509	0.192985	1	4.50523	1.62029	0.0234211
CC_0190	204274	204521	+	5.78538	33.8847	16.8555	4.24566	1	5.85696	2.91346	0.73386
CC_0191	204747	205123	+	54.8735	73.5968	69.0908	33.0004	1	1.34121	1.25909	0.60139
CC_0192	205224	206743	-	155.504	156.474	177.4	240.845	1	1.00624	1.1408	1.5488
leuB	207039	207991	-	143.232	165.107	162.547	111.738	1	1.15272	1.13485	0.78012
CC_0194	208093	208295	-	25.5959	14.6762	36.0474	28.5617	1	0.57338	1.40832	1.11587
leuD	208537	209045	-	41.5496	20.9352	13.184	6.75447	1	0.50386	0.317307	0.162564
leuC	209142	210481	-	139.726	88.7047	217.786	129.879	1	0.634848	1.55867	0.929526
rplS	211171	211472	-	3.68161	5.61149	3.00395	0.192985	1	1.52419	0.815933	0.0524186
trmD	211569	212206	-	0.175315	3.2374	1.50197	1.15791	1	18.4662	8.5673	6.60474
CC_0199	212437	214217	+	390.426	276.258	602.291	623.727	1	0.707581	1.54265	1.59756
CC_0200	214370	215205	-	74.5087	136.402	151.366	170.599	1	1.83069	2.03151	2.28964
CC_0201	215468	216048	+	70.6518	54.1724	62.4153	42.8426	1	0.766752	0.883421	0.606391
CC_0202	216265	217220	+	70.3012	78.5608	103.302	175.037	1	1.11749	1.46943	2.48982
CC_0203	217339	218282	+	75.7359	39.4962	87.9489	199.16	1	0.521499	1.16126	2.62967
kefB	218386	220187	-	188.639	271.078	157.54	214.02	1	1.43702	0.835143	1.13455
CC_0205	220291	220775	-	106.416	44.2444	81.6072	122.931	1	0.415768	0.76687	1.1552
CC_0206	220981	221591	+	80.6448	67.5537	162.714	157.476	1	0.83767	2.01766	1.95271
CC_0207	221691	222232	+	55.2241	12.9496	40.2195	85.6852	1	0.234491	0.728296	1.55159
CC_0208	222333	223222	-	35.0629	61.9422	86.1131	111.159	1	1.7666	2.45596	3.17028
CC_0209	223403	224877	-	150.946	134.676	164.049	42.6496	1	0.892211	1.08681	0.282549
CC_0210	225045	227476	+	522.087	422.588	583.767	923.046	1	0.809421	1.11814	1.76799
CC_0211	227736	228643	+	0.701259	0.431653	0.667544	0.771939	1	0.61554	0.951922	1.10079
CC_0212	228743	229521	+	2.45441	0.863306	3.17083	0.38597	1	0.351737	1.29189	0.157256
CC_0213	229618	230066	+	55.0488	19.2086	30.3732	12.737	1	0.348937	0.551751	0.231376
CC_0214	230294	232257	+	346.071	486.904	535.036	350.46	1	1.40695	1.54603	1.01268
CC_0215	232664	233352	+	183.905	250.359	191.251	85.2993	1	1.36135	1.03995	0.463822
CC_0216	233520	233812	-	18.934	12.7338	5.84101	0.192985	1	0.672535	0.308493	0.0101925
CC_0217	234141	236077	+	42.4261	18.1294	22.8634	16.5967	1	0.427317	0.538898	0.39119
CC_0218	236181	236590	-	68.0221	31.079	128.001	48.4392	1	0.456896	1.88176	0.712109
CC_0219	236734	236951	+	16.1289	7.12227	6.67544	27.0179	1	0.441583	0.413879	1.67512
CC_0220	237080	237585	+	107.117	56.5465	114.817	50.948	1	0.527894	1.07189	0.475628
CC_0221	237692	238101	-	36.1148	22.0143	33.3772	57.8954	1	0.609564	0.924196	1.60309
CC_0222	238291	239810	+	2.27909	2.15826	5.84101	1.35089	1	0.946985	2.56287	0.592733
CC_0223	239919	240601	+	167.601	83.0932	100.632	270.565	1	0.49578	0.600428	1.61434
CC_0224	240698	242643	-	409.535	214.747	503.161	603.077	1	0.524368	1.22862	1.47259
CC_0225	242906	243006	+	7.53853	2.37409	2.50329	0.578954	1	0.314927	0.332066	0.0767994
CC_0226	243207	243382	+	2.62972	1.29496	3.17083	1.15791	1	0.492432	1.20577	0.440316
CC_0227	243540	244006	-	10.8695	14.4604	2.16952	14.2809	1	1.33036	0.199597	1.31385
CC_0228	244106	244620	-	323.28	278.632	272.358	244.898	1	0.86189	0.842482	0.75754
CC_0229	244840	245714	+	56.1007	221.87	87.4482	46.3163	1	3.95485	1.55877	0.825593
CC_0230	245815	246980	-	63.8145	43.3811	109.143	15.2458	1	0.6798	1.71032	0.238908
CC_0231	247144	247490	+	5.25944	16.6186	5.34035	24.1231	1	3.15977	1.01538	4.58663
CC_0232	247587	247903	-	42.0755	20.2877	32.8765	30.4916	1	0.482173	0.781369	0.724687
CC_0233	248132	249069	+	183.905	113.525	46.8949	111.545	1	0.6173	0.254995	0.606537
CC_0234	249166	250226	+	176.542	244.747	224.795	169.634	1	1.38634	1.27333	0.960869
CC_0235	250323	250498	-	21.739	29.9999	31.7083	0	1	1.38	1.45859	0
CC_0236	250661	252258	-	96.7737	127.769	105.138	28.9477	1	1.32029	1.08643	0.299128
chvI	252575	253182	+	105.013	119.352	70.9265	49.7901	1	1.13654	0.675404	0.47413
chvG	253257	254761	+	26.9985	22.0143	26.2011	10.4212	1	0.815391	0.970466	0.385992
CC_0239	254858	255192	+	0.350629	1.72661	1.83574	0.192985	1	4.92432	5.23557	0.550395
CC_0240	255368	255675	+	20.3365	8.84888	8.01052	146.089	1	0.435123	0.393899	7.18361
CC_0241	255772	255950	+	1.2272	0.215826	0	0	1	0.175869	0	0
CC_0242	256259	256314	-	69.2493	61.0789	144.356	136.247	1	0.882014	2.08459	1.96749
CC_0243	256462	256838	-	60.4836	28.7049	35.7136	4.24566	1	0.47459	0.590467	0.0701953
CC_0244	257003	257544	+	89.5858	51.7983	119.49	57.1235	1	0.578198	1.33381	0.63764
CC_0245	257673	257857	+	12.6227	19.6402	26.8686	16.9827	1	1.55595	2.1286	1.34541
CC_0246	258002	258687	+	82.7485	42.9495	40.5533	36.6671	1	0.519036	0.490078	0.443115
spdR	258929	259386	-	94.8452	97.7694	76.1	24.5091	1	1.03083	0.802359	0.258411
CC_0248	259564	260864	-	152.874	85.2514	80.7728	135.089	1	0.557657	0.52836	0.883662
CC_0249	261021	261511	+	116.584	139.208	174.062	50.562	1	1.19406	1.49301	0.433695
CC_0250	261671	262854	+	231.591	158.417	370.654	283.109	1	0.684037	1.60047	1.22245
CC_0251	263003	263622	+	28.401	16.187	28.2037	12.351	1	0.569944	0.993054	0.43488
CC_0252	263834	265695	-	185.308	162.733	247.492	27.7898	1	0.878178	1.33557	0.149966
CC_0253	266049	266977	+	71.1778	98.201	195.423	319.776	1	1.37966	2.74557	4.49264
CC_0254	267214	268016	+	112.201	54.6041	147.026	410.286	1	0.486661	1.31038	3.65669
CC_0255	268113	269137	-	16.6549	35.3955	25.5335	27.4038	1	2.12523	1.5331	1.64539
CC_0256	269256	270007	-	95.8971	59.7839	135.678	31.0705	1	0.623417	1.41483	0.323999
CC_0257	270226	271517	-	25.5959	23.7409	32.0421	136.44	1	0.927526	1.25184	5.33054
271669,,271875	271719	271825	+	48.7375	59.7839	40.7202	41.2987	1	1.22665	0.8355	0.847371
CC_0258	271960	272570	-	104.312	67.7695	64.2511	208.81	1	0.649679	0.61595	2.00177
CC_0259	272922	273532	-	70.6518	31.5107	57.2419	125.44	1	0.445999	0.810197	1.77547
CC_0260	273745	274688	+	0.175315	3.2374	0.333772	0.38597	1	18.4662	1.90384	2.20158
CC_0261	274971	275743	+	25.2453	13.5971	45.393	64.2639	1	0.538598	1.79807	2.54558
CC_0262	275865	276187	-	48.9128	64.5321	66.7544	385.198	1	1.31933	1.36476	7.87519
CC_0263	276434	277587	-	15.0771	28.4891	31.8752	190.283	1	1.88956	2.11415	12.6207
CC_0264	278067	279421	+	153.225	260.287	128.168	352.39	1	1.69872	0.836471	2.29982
CC_0265	279649	280787	-	86.7808	84.8198	107.641	88.387	1	0.977403	1.24038	1.01851
CC_0266	280981	281822	-	121.668	98.8485	136.012	149.177	1	0.812442	1.11789	1.2261
dnaX	282180	283906	+	28.9269	2.37409	9.67938	9.45625	1	0.082072	0.334615	0.326901
CC_0268	284152	284381	+	3.85692	6.47479	8.01052	27.2109	1	1.67875	2.07692	7.05507
recR	284608	285110	+	79.0669	31.2948	62.916	76.422	1	0.395802	0.795731	0.966548
CC_0270	285320	285372	+	11.5708	59.9997	10.0132	16.2107	1	5.18546	0.865384	1.40101
CC_0271	285526	286715	+	98.8775	98.201	120.659	180.441	1	0.993159	1.22028	1.82489
CC_0272	286824	287245	+	1.05189	5.39566	0.83443	22.0003	1	5.1295	0.793268	20.915
287636,,287998	287686	287948	+	33.4851	22.0143	65.9199	151.686	1	0.657435	1.96863	4.52996
CC_0273	288132	289477	-	284.36	166.834	239.481	310.512	1	0.586699	0.842175	1.09197
CC_0274	289667	290046	-	20.6871	6.90645	12.3496	39.1759	1	0.333852	0.596968	1.89373
CC_0275	290211	291271	+	2.45441	10.3597	7.17609	3.47373	1	4.22085	2.92376	1.4153
CC_0276	291389	292209	+	87.6573	52.0142	166.051	73.5272	1	0.593381	1.89432	0.838803
CC_0277	292361	292851	+	16.8302	8.84888	20.3601	31.2635	1	0.525774	1.20973	1.85758
CC_0278	292948	293591	-	16.6549	15.7553	37.5493	55.9656	1	0.945988	2.25455	3.36031
CC_0279	293691	294517	-	5.43476	0.215826	1.1682	0	1	0.0397123	0.21495	0
CC_0280	294709	294941	+	15.7783	7.98558	15.3535	12.158	1	0.506111	0.973076	0.770554
CC_0281	295159	295919	-	0.175315	0	0.166886	0.38597	1	0	0.951922	2.20158
CC_0282	296016	296581	-	61.1848	54.3883	39.2182	37.0531	1	0.888918	0.640979	0.605593
CC_0283	296678	297492	-	86.0795	129.064	159.877	197.423	1	1.49936	1.85731	2.2935
lovR	297785	298143	-	49.0881	37.1221	26.2011	77.5799	1	0.756235	0.533756	1.58042
lovK	298262	299268	-	168.828	126.474	171.058	362.811	1	0.749131	1.01321	2.149
CC_0286	299535	300484	-	289.094	380.286	347.123	561.2	1	1.31544	1.20073	1.94124
CC_0287	300599	300795	-	16.3043	25.0359	10.3469	35.5092	1	1.53554	0.634615	2.17791
CC_0288	301098	304435	-	719.842	502.66	621.149	741.447	1	0.698292	0.862897	1.03001
phoR	304519	305834	+	103.085	33.4531	47.0618	33.5793	1	0.324519	0.456534	0.325744
pstC	306079	307412	+	41.1989	14.0287	57.4087	18.1406	1	0.340512	1.39345	0.440316
pstA	307505	308700	+	33.4851	49.2084	50.2327	35.1232	1	1.46956	1.50015	1.04892
pstB	308809	309584	+	1.05189	1.29496	4.67281	3.08776	1	1.23108	4.4423	2.93544
phoU	309710	310302	+	11.3955	2.80574	6.50855	0.192985	1	0.246216	0.571153	0.0169352
phoB	310424	311016	+	22.4403	7.3381	21.0276	36.4741	1	0.327006	0.937048	1.62539
CC_0295	311089	311846	-	147.44	117.194	162.714	328.46	1	0.794859	1.1036	2.22776
CC_0296	311943	312616	-	128.681	54.8199	85.7793	203.792	1	0.426014	0.666605	1.5837
CC_0297	312728	313911	+	36.4655	37.338	75.4324	40.5268	1	1.02393	2.0686	1.11138
CC_0298	314028	314521	-	78.3657	41.4387	135.845	88.966	1	0.528786	1.73348	1.13527
CC_0299	314665	315647	+	322.053	391.725	355.467	301.635	1	1.21634	1.10375	0.936601
CC_0300	315752	316941	+	163.218	70.7911	75.0987	100.931	1	0.433721	0.460113	0.618382
CC_0301	317077	317984	-	1.75315	1.72661	2.16952	14.6668	1	0.984864	1.2375	8.36601
CC_0302	318081	319258	-	5.9607	2.15826	2.00263	1.92985	1	0.362082	0.335972	0.323762
czcD	319328	320253	-	73.6322	91.2946	36.0474	143.967	1	1.23987	0.48956	1.95521
CC_0304	320385	320998	-	5.61007	2.15826	7.00921	0.771939	1	0.384713	1.2494	0.137599
CC_0305	321095	322818	-	2.80503	4.1007	0.83443	2.31582	1	1.46191	0.297476	0.825593
ctpA	323074	323639	+	3.33098	4.53235	9.5125	0	1	1.36067	2.85577	0
CC_0307	323862	323995	-	0	0	0.83443	0	#DIV/0!	#DIV/0!	#DIV/0!	#DIV/0!
CC_0308	324116	324795	-	52.2438	72.5177	73.2629	31.4565	1	1.38806	1.40233	0.60211
pmbA	324892	326123	-	129.207	72.5177	77.6019	116.949	1	0.561252	0.600602	0.905128
CC_0310	326279	326580	-	36.4655	16.8345	35.2129	87.6151	1	0.461655	0.965652	2.40269
CC_0311	326765	328494	-	456.169	186.69	314.58	351.425	1	0.409256	0.689613	0.770384
CC_0312	328637	329148	-	139.726	152.805	166.051	219.617	1	1.09361	1.18841	1.57177
CC_0313	329274	330703	-	2600.27	4009.62	2136.47	1379.65	1	1.542	0.821636	0.530579
CC_0314	330827	331860	-	44.3546	19.6402	27.2024	52.2989	1	0.4428	0.613294	1.17911
cgtA	331957	332921	-	0.525944	0.215826	0.166886	0.192985	1	0.41036	0.317307	0.36693
CC_0316	333151	334088	+	218.267	129.496	216.284	171.756	1	0.593292	0.990916	0.786911
CC_0317	334274	334707	-	92.7415	62.8055	102.301	66.7727	1	0.67721	1.10308	0.719988
CC_0318	334990	335159	-	3.85692	0	0.83443	0	1	0	0.216346	0
CC_0319	335290	335705	-	0.876573	1.29496	0.83443	0.964924	1	1.4773	0.951922	1.10079
CC_0320	336009	336538	+	92.2155	95.6111	117.154	259.565	1	1.03682	1.27044	2.81476
CC_0321	336681	337678	+	57.6785	48.1293	123.829	98.2292	1	0.83444	2.14689	1.70305
CC_0322	337982	338340	-	19.4599	87.8414	18.5243	9.26327	1	4.51396	0.951922	0.476018
338371,,338499	338421	338449	-	29.8035	50.7192	33.2103	22.3862	1	1.70179	1.11431	0.751128
CC_0323	338684	339615	+	74.8594	29.1366	60.2458	54.6147	1	0.389217	0.804786	0.729564
CC_0324	339878	340440	-	74.8594	33.2373	75.9331	261.88	1	0.443996	1.01434	3.4983
CC_0325	340625	341214	+	235.448	131.007	163.381	155.932	1	0.556415	0.693918	0.662278
CC_0326	341327	341775	+	9.29168	46.1869	29.8726	70.6324	1	4.97078	3.21498	7.60169
mopB	341882	342552	-	70.3012	86.7622	150.364	29.1407	1	1.23415	2.13886	0.414512
CC_0328	342724	343382	+	30.8554	33.8847	59.7452	80.8606	1	1.09818	1.9363	2.62063
CC_0329	343485	344059	+	130.96	45.5394	44.7254	107.686	1	0.347735	0.34152	0.822277
CC_0330	344180	344991	-	54.3475	39.2804	89.1171	87.2291	1	0.722763	1.63976	1.60502
CC_0331	345070	345530	+	11.5708	11.223	52.5691	109.808	1	0.969942	4.54326	9.49015
CC_0332	345668	346005	+	93.618	20.0719	96.7938	151.879	1	0.214402	1.03392	1.62233
CC_0333	346116	347467	+	23.1415	9.28054	11.1814	5.21059	1	0.401034	0.483172	0.225162
CC_0334	347582	348255	+	158.484	71.0069	113.649	155.932	1	0.448037	0.717101	0.983893
CC_0335	348295	350669	+	816.616	727.119	915.202	1166.21	1	0.890406	1.12073	1.4281
CC_0336	350838	352054	+	249.823	262.445	281.536	353.741	1	1.05052	1.12694	1.41596
CC_0337	352484	353583	+	1.75315	0.215826	1.1682	0	1	0.123108	0.666345	0
sucD	353684	354468	+	1.75315	0.647479	1.00132	0.192985	1	0.369324	0.571153	0.110079
odhA	354747	357610	+	26.8231	73.5968	38.05	18.3336	1	2.74378	1.41855	0.683497
odhB	357770	358878	+	2.10378	0.215826	2.3364	0.38597	1	0.10259	1.11058	0.183465
359000,,359335	359050	359285	+	49.9647	63.453	115.318	43.6146	1	1.26996	2.30799	0.872908
CC_0341	359393	360282	-	194.775	105.107	178.902	136.633	1	0.539636	0.918506	0.701494
CC_0342	360442	361769	+	3.85692	5.61149	12.0158	31.8425	1	1.45491	3.11538	8.25593
361909,,362088	361959	362038	+	0.175315	0	0.166886	0.38597	1	0	0.951922	2.20158
CC_0343	362268	364171	-	154.452	113.741	224.795	438.268	1	0.736412	1.45544	2.83757
CC_0344	364445	365259	-	70.3012	31.2948	31.3745	15.8248	1	0.445154	0.446288	0.225099
CC_0345	365356	365936	-	2.98035	0.431653	0.500658	2.31582	1	0.144833	0.167986	0.777029
CC_0346	366162	368221	+	10.6942	7.76975	2.16952	0.578954	1	0.726539	0.202869	0.0541372
CC_0347	368408	369105	-	63.2886	38.6329	121.66	196.844	1	0.610425	1.9223	3.11027
CC_0348	369330	370324	+	709.674	821.651	692.577	483.813	1	1.15779	0.975908	0.68174
CC_0349	370495	371102	+	24.8947	57.8415	32.5427	3.28074	1	2.32345	1.30722	0.131785
CC_0350	371373	372517	+	151.823	101.223	178.401	343.32	1	0.666717	1.17506	2.26132
CC_0351	372688	373352	+	280.679	151.726	167.22	293.723	1	0.540568	0.595769	1.04647
CC_0352	373561	374888	+	187.061	133.597	265.682	546.919	1	0.714188	1.4203	2.92375
CC_0353	375026	375786	-	1105.18	1402.44	806.56	963.187	1	1.26897	0.729797	0.871518
CC_0354	375879	376666	+	235.623	89.9996	219.121	232.933	1	0.381965	0.929966	0.988582
CC_0355	376966	377756	+	77.1385	47.9135	119.991	173.879	1	0.621136	1.55553	2.25412
CC_0356	377853	378700	-	144.459	113.741	183.741	132.966	1	0.787353	1.27192	0.920443
CC_0357	378852	379243	-	20.8624	10.1438	15.3535	0.578954	1	0.486225	0.73594	0.027751
CC_0358	379374	380050	-	39.0952	36.9063	31.7083	26.6319	1	0.944012	0.811055	0.681207
CC_0359	380229	381223	-	22.6156	7.98558	10.0132	9.26327	1	0.353101	0.442754	0.409597
CC_0360	381446	382605	-	1.92846	3.88488	2.83706	4.43865	1	2.01449	1.47115	2.30165
CC_0361	383059	383753	+	91.5143	62.3738	126.5	32.2285	1	0.681575	1.38229	0.352169
CC_0362	383850	384775	+	132.713	239.567	346.121	394.075	1	1.80515	2.60804	2.96937
CC_0363	384881	385617	+	40.8483	73.381	39.8857	103.826	1	1.79643	0.976435	2.54174
CC_0364	385867	387080	+	64.1652	93.237	74.4311	203.792	1	1.45308	1.15999	3.17605
CC_0365	387626	388035	-	10.5189	1.72661	4.17215	0.771939	1	0.164144	0.396634	0.073386
CC_0366	388146	388579	-	3.33098	1.29496	1.1682	7.52641	1	0.388762	0.350708	2.25952
CC_0367	388806	388930	-	0	0	0	0.578954	#DIV/0!	#DIV/0!	#DIV/0!	#DIV/0!
CC_0368	389080	389741	-	15.603	38.6329	9.67938	5.98253	1	2.47599	0.620354	0.383422
CC_0369	389847	390127	-	52.5944	12.0863	10.5138	174.844	1	0.229802	0.199904	3.32439
CC_0371	390649	390938	+	17.1808	7.55392	20.527	18.9125	1	0.439671	1.19476	1.10079
CC_0372	391082	391788	+	102.208	86.7622	54.5717	98.4222	1	0.848875	0.533925	0.962956
CC_0373	392003	395346	-	164.971	166.834	90.619	35.3162	1	1.01129	0.549302	0.214075
CC_0374	395468	395976	-	22.265	75.5392	73.2629	52.8778	1	3.39274	3.2905	2.37493
CC_0375	396076	396590	-	86.7808	45.971	50.2327	5.78954	1	0.529737	0.578845	0.0667146
CC_0376, COG5389	396929	397368	-	6.66196	0.863306	1.1682	5.0176	1	0.129587	0.175354	0.753173
CC_0377	397516	398465	+	155.504	171.798	208.274	180.248	1	1.10478	1.33934	1.15912
ccrM	398687	399663	-	4.38287	1.94244	0.667544	0	1	0.443189	0.152308	0
CC_0379	399902	400437	-	37.1667	18.9927	53.7373	18.3336	1	0.511014	1.44584	0.493279
CC_0380	400624	401429	+	137.797	101.438	127.668	224.055	1	0.736142	0.926489	1.62598
CC_0381	401577	402811	+	292.25	96.9061	295.054	340.618	1	0.331587	1.0096	1.1655
CC_0382	402908	403395	-	70.3012	50.0717	129.337	103.247	1	0.712246	1.83975	1.46864
CC_0383	403553	403947	+	98.3515	90.2155	126.333	181.02	1	0.917276	1.2845	1.84054
CC_0384	404175	404956	-	35.9395	111.582	26.0342	143.581	1	3.10472	0.724389	3.99506
CC_0385	405154	405899	-	17.7068	10.7913	62.4153	31.8425	1	0.609446	3.52494	1.79832
CC_0386	406049	407163	+	93.7934	153.237	80.6059	27.2109	1	1.63377	0.859399	0.290115
CC_0387	407260	407717	+	2.98035	11.6546	18.1906	0.578954	1	3.91049	6.1035	0.194257
CC_0388	407898	409132	+	9.81762	17.6978	14.5191	26.8249	1	1.80265	1.47888	2.73232
CC_0389	409376	410502	-	111.5	33.4531	171.892	43.2286	1	0.300027	1.54163	0.3877
CC_0390	410599	410993	-	129.558	80.0716	105.138	32.2285	1	0.618039	0.811517	0.248758
CC_0391	411102	412792	+	318.196	207.841	289.38	328.46	1	0.653185	0.90944	1.03226
CC_0392	412983	413560	-	116.935	52.4458	161.379	99.7731	1	0.448504	1.38007	0.853237
CC_0393	413791	415229	+	164.62	257.913	153.702	333.864	1	1.56671	0.933674	2.02808
CC_0394	415456	416705	-	356.415	195.539	572.252	294.302	1	0.548627	1.60558	0.825728
CC_0395	416822	417966	+	172.51	159.712	169.389	263.424	1	0.925812	0.981911	1.52701
CC_0396	418111	418454	+	0	2.15826	0.166886	0.771939	#DIV/0!	#DIV/0!	#DIV/0!	#DIV/0!
CC_0397	418551	419221	+	60.4836	27.6258	115.652	47.6672	1	0.456749	1.91212	0.788102
419275,,419691	419325	419641	+	46.4584	91.5104	92.2879	111.738	1	1.96973	1.98646	2.40512
CC_0398	419778	420649	+	86.4301	48.1293	72.9291	82.0185	1	0.556858	0.843793	0.948958
CC_0399	420749	421164	+	27.6997	55.0357	152.534	79.7027	1	1.98687	5.50669	2.87738
CC_0400	421261	422018	+	140.252	59.1364	129.003	62.3341	1	0.421645	0.919795	0.444444
tfoX	422220	422503	-	43.8287	10.5755	29.205	61.5621	1	0.241292	0.666345	1.40461
CC_0402	422566	422957	+	95.1959	56.1149	139.85	101.124	1	0.589467	1.46908	1.06227
CC_0403	423090	424294	-	128.33	63.0213	197.092	198.002	1	0.491087	1.53582	1.54291
CC_0404	424357	424400	+	14.9017	12.9496	15.5204	21.6143	1	0.868998	1.04151	1.45045
CC_0405	424563	424993	+	6.13601	2.37409	5.00658	12.158	1	0.386911	0.815933	1.98142
CC_0406	425126	425589	+	59.7823	232.877	61.2471	127.177	1	3.89541	1.0245	2.12733
CC_0407	425686	426236	+	53.1203	17.6978	22.5296	50.176	1	0.333164	0.424124	0.944573
CC_0408	426441	427582	+	20.5118	9.92802	16.1879	7.71939	1	0.484014	0.7892	0.376339
CC_0409	427703	428304	+	128.681	111.798	81.7741	175.423	1	0.8688	0.635479	1.36324
CC_0410	428663	429573	-	66.269	44.2444	107.975	38.7899	1	0.667649	1.62935	0.585341
CC_0411	429775	430073	-	204.417	106.618	152.867	139.721	1	0.521573	0.747822	0.68351
CC_0412	430177	430523	-	127.98	105.323	82.4416	87.4221	1	0.822969	0.644177	0.683093
CC_0413	430622	430686	+	7.53853	1.29496	4.67281	0.192985	1	0.171779	0.619856	0.0255998
CC_0414	430783	431219	+	12.9733	11.0071	27.8699	122.159	1	0.848447	2.14826	9.41622
CC_0415	431384	431835	-	41.5496	19.4244	54.2379	138.949	1	0.467499	1.30538	3.34417
CC_0416	431932	432179	-	1.2272	0.215826	0.667544	2.31582	1	0.175869	0.543955	1.88707
CC_0417	432386	433038	-	18.934	22.2301	88.1158	18.5265	1	1.17409	4.65384	0.978481
CC_0418	433454	433824	+	46.9843	37.1221	109.31	146.861	1	0.790096	2.32653	3.12575
CC_0419	434171	435510	+	279.101	91.9421	407.368	181.792	1	0.329422	1.45957	0.651347
CC_0420	435683	436044	-	109.572	51.5825	86.7807	38.597	1	0.470765	0.791999	0.352253
CC_0421	436595	436839	+	47.5103	37.5538	72.5954	52.2989	1	0.790435	1.52799	1.10079
CC_0422	437008	437096	+	1.2272	0.647479	0.83443	0.192985	1	0.527606	0.679944	0.157256
CC_0423	437196	437278	+	2.80503	3.88488	3.83838	0	1	1.38497	1.36839	0
437383,,437550	437433	437500	+	0.350629	20.2877	2.16952	0	1	57.8608	6.18749	0
437556,,437741	437606	437691	-	33.1345	3.02157	2.00263	6.3685	1	0.0911911	0.0604395	0.192202
437761,,437883	437811	437833	+	62.0614	39.2804	27.3693	19.2985	1	0.632928	0.441003	0.310958
CC_0424	438206	438600	-	82.7485	65.8271	39.8857	168.862	1	0.795507	0.482011	2.04066
438748,,439005	438798	438955	+	2.98035	11.4388	5.17346	1.35089	1	3.83807	1.73586	0.453267
CC_0425	439118	439953	+	31.5566	39.9279	9.67938	6.75447	1	1.26528	0.30673	0.214043
CC_0426	440155	441557	+	369.914	304.099	440.412	406.233	1	0.822081	1.19058	1.09818
CC_0427	441767	442815	+	161.465	80.2874	112.314	144.16	1	0.497244	0.695596	0.892824
CC_0428	443114	444627	+	221.422	174.388	185.911	154.002	1	0.787579	0.839621	0.695511
CC_0429	444939	445213	-	29.9788	17.4819	27.5362	38.404	1	0.583143	0.918521	1.28104
CC_0430	445547	447468	+	195.826	138.345	274.027	424.567	1	0.706466	1.39933	2.16807
CC_0431	447553	447755	+	20.3365	13.3812	27.0355	27.5968	1	0.657991	1.32941	1.35701
cheYI	447852	448117	+	16.3043	27.41	16.3548	41.1058	1	1.68115	1.0031	2.52117
cheAI	448287	450475	+	83.9757	54.3883	105.806	48.8252	1	0.647666	1.25996	0.58142
CC_0434	450579	450946	+	79.5929	49.6401	67.9226	51.334	1	0.623675	0.853375	0.644957
CC_0435	451046	451827	+	319.599	103.813	275.862	208.038	1	0.324821	0.863153	0.650934
CC_0436	451927	452861	+	63.2886	26.7625	105.806	60.0183	1	0.422864	1.6718	0.948327
CC_0437	452965	453254	+	16.8302	25.4675	33.3772	48.0532	1	1.5132	1.98317	2.85518
cheD	453351	453814	+	11.3955	15.5395	42.5559	25.474	1	1.36366	3.73446	2.23545
cheU	453918	454201	+	7.53853	25.0359	2.00263	10.0352	1	3.32105	0.265653	1.33119
cheYIII	454309	454811	+	152.173	170.287	177.9	168.669	1	1.11903	1.16907	1.1084
cheE	454908	455278	+	58.0292	56.1149	76.9344	163.265	1	0.967012	1.32579	2.8135
CC_0442	455648	458589	+	824.154	639.925	777.521	990.977	1	0.776463	0.943417	1.20242
CC_0443	458771	459807	-	136.921	181.294	161.546	52.8778	1	1.32408	1.17985	0.386193
CC_0444	459907	460898	-	247.544	139.856	165.217	106.721	1	0.564972	0.667424	0.431117
CC_0445	461027	461739	-	75.3853	30.8632	57.4087	164.23	1	0.409406	0.761538	2.17854
nagA	462042	464611	+	853.257	462.948	803.556	580.884	1	0.542566	0.941751	0.680785
CC_0447	464869	467042	+	263.147	206.114	311.409	328.46	1	0.783265	1.1834	1.2482
CC_0448	467156	469614	+	55.7501	35.3955	63.5835	33.5793	1	0.634897	1.14051	0.602319
CC_0449	469711	471365	+	272.088	200.719	190.917	186.23	1	0.737696	0.701674	0.684448
nhaA	471592	472733	+	59.2564	74.0285	125.164	31.4565	1	1.24929	2.11225	0.530855
473245,,473400	473295	473350	+	43.8287	3.2374	10.3469	7.52641	1	0.0738648	0.236077	0.171723
476538,,476816	476588	476766	-	125.175	96.4744	102.635	74.2991	1	0.770718	0.819933	0.593564
477514,,477678	477564	477628	+	25.7713	15.7553	13.8515	22.1932	1	0.611353	0.53748	0.861163
477921,,479033	477971	478983	+	8.94105	11.0071	5.84101	1.15791	1	1.23108	0.65328	0.129505
479191,,480435	479241	480385	+	12.798	7.98558	4.83969	0.964924	1	0.623972	0.378161	0.0753966
480439,,481710	480489	481660	+	70.6518	82.4457	34.8792	31.4565	1	1.16693	0.493677	0.445233
481820,,481933	481870	481883	-	59.2564	22.4459	81.1065	59.6323	1	0.378794	1.36874	1.00634
482231,,483454	482281	483404	-	48.7375	70.7911	38.5506	70.8254	1	1.4525	0.790986	1.4532
484789,,486132	484839	486082	-	806.973	387.624	465.945	21.6143	1	0.480343	0.577399	0.0267844
486159,,487127	486209	487077	-	191.794	359.351	351.295	470.111	1	1.87363	1.83162	2.45112
487093,,488169	487143	488119	-	458.097	396.689	593.613	465.093	1	0.865949	1.29582	1.01527
488274,,488768	488324	488718	-	128.856	142.014	112.147	103.054	1	1.10211	0.870329	0.799758
trwC	488818	491528	-	571.876	556.616	528.027	487.287	1	0.973316	0.923324	0.852084
trwB	491562	493279	-	283.659	234.172	345.287	264.196	1	0.825539	1.21726	0.931386
493326,,493709	493376	493659	-	67.1455	44.8919	31.2077	12.544	1	0.668576	0.464777	0.186818
494090,,494284	494140	494234	-	36.6408	59.1364	21.1945	32.4214	1	1.61395	0.578441	0.884846
494406,,495143	494456	495093	-	253.68	179.999	215.783	366.285	1	0.709551	0.850612	1.44388
495332,,495655	495382	495605	+	44.3546	40.1437	80.9397	38.018	1	0.905063	1.82483	0.857137
495724,,497277	495774	497227	-	346.247	189.28	270.856	160.177	1	0.546662	0.782263	0.462611
497307,,497597	497357	497547	+	29.9788	20.0719	27.3693	74.2991	1	0.669535	0.912954	2.47839
497584,,498855	497634	498805	+	184.606	272.805	264.848	248.95	1	1.47776	1.43466	1.34855
CC_0451	499429	500174	-	56.276	80.5033	45.0592	160.756	1	1.43051	0.800682	2.85657
CC_0452	500364	501007	-	106.416	124.963	156.873	175.423	1	1.17429	1.47415	1.64847
CC_0453	501164	502092	-	95.8971	105.971	95.125	128.721	1	1.10505	0.991948	1.34228
CC_0454	502285	504674	+	2291.54	3763.8	1891.48	1396.82	1	1.64248	0.825421	0.609557
CC_0455	504961	506555	+	520.86	363.452	673.885	706.903	1	0.697792	1.29379	1.35719
CC_0456	506765	507291	-	103.085	68.8486	137.514	15.4388	1	0.667882	1.33399	0.149767
CC_0457	507378	507697	-	129.733	101.007	124.33	25.667	1	0.778575	0.958354	0.197845
CC_0458	507918	508672	+	278.4	345.97	185.577	553.673	1	1.24271	0.666585	1.98877
CC_0459	508920	509458	-	31.3813	64.7479	43.7241	14.8598	1	2.06326	1.39332	0.473524
CC_0460	509754	511045	+	1.40252	2.15826	1.00132	0	1	1.53885	0.713942	0
CC_0461	511148	511509	+	53.471	30.8632	166.719	55.5796	1	0.577195	3.11793	1.03944
CC_0462	511616	511977	+	6.31133	7.98558	32.8765	12.544	1	1.26528	5.20913	1.98754
CC_0463	512130	512284	+	147.089	37.7696	32.8765	37.632	1	0.256781	0.223514	0.255845
CC_0464	512381	514248	+	0.876573	1.72661	0.667544	0.771939	1	1.96973	0.761538	0.880633
CC_0465	514348	515174	+	96.949	34.5322	217.786	57.3165	1	0.35619	2.2464	0.591202
515285,,515404	515335	515354	-	14.9017	34.3164	9.5125	40.3338	1	2.30284	0.638348	2.70665
CC_0466	515530	515795	-	163.744	90.2155	92.4548	148.405	1	0.550955	0.56463	0.906326
CC_0467	515892	516691	-	4.7335	0.863306	0	1.15791	1	0.182382	0	0.24462
CC_0468	516788	518367	-	256.485	107.482	428.229	163.458	1	0.419055	1.6696	0.6373
CC_0469	518524	519161	+	46.9843	24.1726	54.9055	10.0352	1	0.514481	1.16859	0.213586
CC_0470	519318	519682	+	124.999	51.1509	62.0816	215.178	1	0.409209	0.496655	1.72143
CC_0471	519779	520143	-	58.9057	78.9925	86.4469	103.247	1	1.341	1.46755	1.75275
CC_0472	520448	520899	+	18.5834	8.84888	39.7188	46.3163	1	0.476173	2.13733	2.49236
CC_0473	521005	522185	+	1006.31	1707.62	1219.77	1667.2	1	1.69692	1.21212	1.65675
CC_0474	522291	523036	+	118.863	81.5824	268.186	546.34	1	0.686354	2.25625	4.59637
CC_0475	523204	523877	-	48.3869	47.266	51.5677	65.0359	1	0.976835	1.06574	1.34408
CC_0476	524043	524476	-	69.2493	173.74	64.2511	166.16	1	2.50891	0.927823	2.39945
CC_0477	524573	525150	-	196.002	117.625	191.919	328.46	1	0.600124	0.979168	1.6758
CC_0478	525250	525845	-	256.135	229.639	291.383	310.32	1	0.896557	1.13762	1.21155
CC_0479	525995	526995	-	65.9183	95.8269	154.203	86.0712	1	1.45372	2.3393	1.30573
CC_0480	527220	527920	-	247.369	195.107	267.351	386.934	1	0.788729	1.08078	1.5642
CC_0481	528128	528858	+	194.249	120.863	234.308	148.019	1	0.622207	1.20623	0.762009
CC_0482	529374	531607	+	228.786	214.531	293.552	376.127	1	0.937696	1.28309	1.64402
CC_0483	531733	532382	-	205.995	153.453	234.975	308.004	1	0.744934	1.14069	1.4952
CC_0484	532485	533002	-	0.175315	1.07913	0.667544	0.38597	1	6.1554	3.80769	2.20158
CC_0485	533190	533683	-	3.50629	1.07913	0.83443	15.4388	1	0.30777	0.237981	4.40316
CC_0486	533941	534917	-	161.991	197.481	220.289	203.213	1	1.21909	1.35989	1.25447
CC_0487	535248	536086	-	49.0881	64.9638	26.5349	16.4037	1	1.32341	0.540556	0.334169
CC_0488	536327	536478	-	34.8876	11.0071	20.0263	40.3338	1	0.315503	0.574023	1.15611
CC_0489	536559	536755	-	38.7445	10.1438	15.5204	74.8781	1	0.261813	0.400583	1.93261
CC_0490	536903	537588	-	117.11	154.316	94.7912	204.95	1	1.3177	0.809419	1.75006
CC_0491, COG1565	537685	538709	-	0.701259	0.431653	0.333772	11.1931	1	0.61554	0.475961	15.9615
CC_0492	538796	539604	-	23.1415	26.7625	8.01052	5.59656	1	1.15647	0.346153	0.24184
539769,,540026	539819	539976	+	0.175315	0.215826	0.333772	0	1	1.23108	1.90384	0
CC_0493	540207	540613	+	69.5999	15.5395	120.325	64.8429	1	0.223269	1.72881	0.931652
CC_0494	540894	541576	+	61.0095	26.7625	72.9291	59.8253	1	0.438661	1.19537	0.980589
CC_0495	541745	542181	+	32.0826	58.0573	21.5283	12.544	1	1.80962	0.671027	0.390991
CC_0496	542631	543049	+	0.350629	0.647479	0	0.192985	1	1.84662	0	0.550395
CC_0497	543195	543478	+	0.350629	1.07913	0.333772	1.15791	1	3.0777	0.951922	3.30237
CC_0498	544002	544792	+	146.914	88.0572	183.741	247.021	1	0.59938	1.25068	1.6814
hfsI	544915	546137	-	232.993	376.401	297.558	621.99	1	1.6155	1.27711	2.66956
CC_0500	546298	547286	+	105.364	61.0789	121.66	189.511	1	0.579693	1.15466	1.79863
CC_0501	547429	547487	+	79.2422	25.4675	23.0303	36.0882	1	0.321388	0.290631	0.455416
CC_0502	547881	551851	+	3414.08	3859.41	1746.13	1255.94	1	1.13044	0.511449	0.367872
CC_0503	552065	556155	+	7.1879	6.25897	7.84364	9.64924	1	0.870764	1.09123	1.34243
CC_0504	556474	558170	+	170.055	186.69	362.142	165.774	1	1.09782	2.12956	0.974824
CC_0505	558299	559659	-	247.194	190.359	432.568	520.287	1	0.77008	1.74992	2.10477
CC_0506	559954	560726	-	54.1722	13.5971	27.0355	107.686	1	0.250997	0.499066	1.98784
CC_0507	561086	561294	+	36.6408	25.0359	17.6899	7.52641	1	0.683279	0.482793	0.205411
CC_0508	561391	561614	-	69.7752	47.6976	148.028	52.6848	1	0.68359	2.12149	0.755065
CC_0509	561763	562313	-	16.6549	26.9783	17.8568	66.3868	1	1.61984	1.07216	3.98602
CC_0510	562629	563704	+	8.76573	9.28054	3.5046	8.8773	1	1.05873	0.399807	1.01273
CC_0511	563875	564497	+	181.977	101.87	137.514	149.37	1	0.559798	0.755668	0.820821
CC_0512	564721	565403	+	39.4458	94.9636	38.8844	20.6494	1	2.40745	0.985768	0.523487
CC_0513	565681	565829	+	120.091	82.4457	51.0671	154.388	1	0.686529	0.425238	1.2856
CC_0514	565954	566120	+	27.875	25.2517	61.7478	43.8075	1	0.905889	2.21516	1.57157
CC_0515	566214	567040	+	219.143	130.791	268.186	270.179	1	0.596828	1.22379	1.23289
CC_0516	567056	568002	+	313.989	103.381	297.224	188.353	1	0.32925	0.946607	0.599873
CC_0517	568310	568650	-	82.2226	46.1869	160.711	125.633	1	0.56173	1.95459	1.52796
CC_0518	569006	569376	-	184.957	85.0356	171.058	239.301	1	0.459759	0.924853	1.29382
CC_0519	569473	570122	-	96.4231	105.107	92.2879	22.3862	1	1.09007	0.957114	0.232167
CC_0520	570288	570994	+	77.1385	80.2874	140.184	44.7725	1	1.04082	1.81731	0.580417
CC_0521	571167	571411	+	24.8947	28.4891	15.5204	4.05268	1	1.14438	0.623442	0.162793
CC_0522	571596	573013	+	175.841	155.611	185.744	159.019	1	0.884954	1.05632	0.904339
CC_0523	573070	573749	-	160.238	122.805	230.469	245.477	1	0.766395	1.4383	1.53195
CC_0524	573846	574411	-	12.6227	12.9496	54.5717	0.964924	1	1.0259	4.32331	0.0764438
CC_0525	574639	575687	-	281.029	237.625	355.634	720.798	1	0.845552	1.26547	2.56485
sixA	575865	576277	+	25.2453	6.69062	10.8476	9.45625	1	0.265024	0.429687	0.374575
CC_0527	576374	576618	+	51.0166	21.5826	8.51118	43.8075	1	0.423052	0.166832	0.858692
CC_0528	576715	577673	+	10.8695	11.223	10.8476	25.088	1	1.03252	0.997983	2.30811
CC_0529	577770	578407	+	95.0206	232.013	82.6085	228.301	1	2.44172	0.869375	2.40265
cenK	578517	579922	+	912.864	1374.17	553.394	286.968	1	1.50534	0.606217	0.314361
CC_0531	580086	581728	-	309.781	195.107	496.152	738.939	1	0.629823	1.60162	2.38536
rspA	582380	583491	-	296.983	273.884	269.854	618.902	1	0.92222	0.908653	2.08396
CC_0533	583714	585926	-	839.582	572.587	916.537	673.131	1	0.681991	1.09166	0.801745
CC_0534	585998	587061	-	31.732	21.3668	22.6965	2.70179	1	0.673353	0.715256	0.085144
CC_0535	587161	588137	-	119.565	40.7912	112.314	126.791	1	0.341164	0.93936	1.06044
CC_0536	588275	589080	-	147.264	116.115	226.798	87.2291	1	0.788478	1.54007	0.59233
CC_0537	589182	591718	+	70.8271	39.7121	64.9186	32.6144	1	0.56069	0.916578	0.460479
CC_0538	591815	593463	+	272.614	195.755	188.247	177.546	1	0.718064	0.690526	0.651272
CC_0539	593810	596550	+	640.424	642.084	701.588	405.654	1	1.00259	1.09551	0.633414
CC_0540	596790	599002	+	659.183	413.955	697.917	916.099	1	0.627982	1.05876	1.38975
CC_0541	599099	600117	+	952.835	1559.35	648.352	638.78	1	1.63653	0.680445	0.670399
oppA	600226	601370	+	123.947	63.2371	118.155	95.1415	1	0.510193	0.953268	0.767595
CC_0543	601467	601549	-	4.55818	7.76975	10.0132	10.4212	1	1.70457	2.19674	2.28626
CC_0544	601546	603983	-	396.562	211.294	355.3	485.164	1	0.532815	0.895951	1.22343
CC_0545	604260	605959	-	356.239	342.732	482.133	955.275	1	0.962084	1.3534	2.68155
CC_0546	606257	609240	-	181.626	182.157	160.544	254.547	1	1.00293	0.883928	1.40149
CC_0547	609295	611039	+	101.683	80.9349	188.581	205.143	1	0.795957	1.85461	2.01748
CC_0548	611169	611707	+	166.724	48.1293	141.853	210.353	1	0.288676	0.850824	1.26168
CC_0549	611888	612579	-	97.2996	89.9996	82.4416	198.774	1	0.924974	0.847296	2.04291
CC_0550	612861	613186	+	55.3994	12.3021	29.205	75.0711	1	0.222062	0.527172	1.35509
CC_0551	613374	614329	+	226.682	116.546	400.526	428.619	1	0.51414	1.76691	1.89084
CC_0552	614465	615696	-	196.878	270.862	175.731	289.091	1	1.37578	0.892586	1.46837
CC_0553	615984	617380	+	247.018	156.906	216.618	363.39	1	0.635199	0.87693	1.47111
617604,,617843	617654	617793	+	40.1471	53.3091	81.2734	79.1238	1	1.32785	2.02439	1.97085
CC_0554	617901	618517	-	370.791	374.243	540.877	514.883	1	1.00931	1.45871	1.38861
CC_0555	618665	619674	-	144.985	85.8989	161.546	130.458	1	0.592467	1.11422	0.8998
CC_0556	619778	621741	-	864.301	599.997	819.243	879.239	1	0.694199	0.947867	1.01728
CC_0557	621854	622821	-	687.234	227.049	470.952	371.11	1	0.330382	0.685287	0.540005
CC_0558	622984	624467	-	656.729	268.488	609.3	784.869	1	0.408826	0.927781	1.19512
CC_0559	624572	626292	-	537.164	600.213	717.276	410.672	1	1.11737	1.3353	0.764518
CC_0560	626949	627838	-	62.938	60.2156	34.8792	15.0528	1	0.956745	0.554183	0.239169
CC_0561	627896	628362	-	275.595	254.459	221.124	113.282	1	0.92331	0.802352	0.411046
CC_0562	628573	631613	+	286.464	251.869	455.765	408.935	1	0.879235	1.591	1.42752
CC_0563	631936	634766	-	783.306	784.529	1435.55	1336.23	1	1.00156	1.83268	1.70588
CC_0564	634917	635638	-	128.681	38.4171	62.0816	54.2287	1	0.298545	0.482445	0.42142
CC_0565	635711	636840	+	150.946	79.4241	133.342	216.143	1	0.526176	0.883375	1.43192
CC_0566	636927	637798	+	135.694	74.8918	129.337	104.019	1	0.551918	0.953152	0.766571
CC_0567	637895	639108	+	122.37	69.2803	202.933	273.845	1	0.566156	1.65836	2.23785
CC_0568	639205	640103	+	103.26	43.8128	80.9397	197.809	1	0.424294	0.783841	1.91564
CC_0569	640181	640962	+	74.8594	30.2157	94.2905	60.9832	1	0.403633	1.25957	0.814637
CC_0570	641172	641860	-	131.837	109.64	108.142	172.142	1	0.831634	0.820273	1.30573
642000,,642233	642050	642183	-	125.701	424.962	135.845	53.8428	1	3.38075	1.0807	0.428341
CC_0571	642627	645520	+	1068.89	681.148	1660.51	1546.58	1	0.637246	1.55349	1.4469
CC_0572	645752	647235	+	350.629	394.099	534.202	438.268	1	1.12398	1.52355	1.24995
CC_0573	647419	648365	+	137.271	114.82	195.09	280.214	1	0.836443	1.4212	2.04131
CC_0574	648478	650981	+	654.45	614.458	1022.68	1271.77	1	0.938892	1.56265	1.94327
CC_0575	651369	652765	+	357.116	326.977	526.859	637.429	1	0.915605	1.47532	1.78493
CC_0576	653345	654129	-	156.907	147.841	138.849	259.179	1	0.942223	0.884915	1.6518
CC_0577	654226	655469	-	60.1329	25.2517	130.338	44.1935	1	0.419931	2.1675	0.73493
CC_0578	655446	656878	-	277.874	202.229	334.106	439.233	1	0.727774	1.20236	1.58069
CC_0579	656995	659813	-	838.355	759.493	1205.25	1076.08	1	0.905933	1.43764	1.28357
CC_0580	660207	660595	-	63.4639	82.4457	199.762	106.914	1	1.2991	3.14765	1.68464
CC_0581	660781	661724	+	298.035	190.575	155.204	428.04	1	0.639438	0.520757	1.43621
CC_0582	661811	663129	+	252.453	156.474	229.134	554.831	1	0.619815	0.907631	2.19776
CC_0583	663226	664406	+	224.227	252.517	331.269	319.004	1	1.12616	1.47738	1.42268
CC_0584	664516	665594	+	327.663	175.899	149.196	293.53	1	0.536827	0.455333	0.895828
CC_0585	666097	666551	-	265.602	137.266	225.964	413.952	1	0.51681	0.850761	1.55855
666621,,666806	666671	666756	+	14.3758	17.0503	43.0566	19.8774	1	1.18604	2.99507	1.3827
CC_0586	666994	669101	+	572.227	545.393	765.673	945.046	1	0.953107	1.33806	1.65152
CC_0587	669283	670346	-	107.117	136.618	73.4298	161.335	1	1.27541	0.685508	1.50616
CC_0588	670548	670825	+	103.962	33.6689	45.8936	109.808	1	0.323859	0.441448	1.05624
CC_0589	670979	672792	-	207.748	173.093	392.349	165.967	1	0.833187	1.88858	0.798886
CC_0590	672971	673332	-	10.8695	9.49636	3.33772	5.78954	1	0.87367	0.307072	0.532641
cheY	673438	673721	-	268.231	253.812	108.81	260.722	1	0.946242	0.405656	0.972005
CC_0593	674413	676199	+	262.095	195.539	298.559	276.354	1	0.746059	1.13912	1.0544
cheAII	676336	678530	+	205.118	66.4745	298.726	173.107	1	0.324079	1.45636	0.84394
cheW	678627	678979	+	102.91	100.359	73.096	52.2989	1	0.975217	0.710293	0.508202
CC_0596	679076	679344	+	107.643	3.2374	23.364	2.12283	1	0.0300752	0.217051	0.019721
cheBII	679441	680417	+	124.824	72.3019	213.614	117.528	1	0.57923	1.71132	0.941547
CC_0598	680514	681244	+	95.8971	135.323	143.522	184.686	1	1.41113	1.49662	1.92588
CC_0599	681881	683481	+	204.242	245.395	320.087	321.127	1	1.20149	1.5672	1.57229
CC_0600	683587	684338	+	262.271	301.294	152.367	337.144	1	1.14879	0.580952	1.28548
CC_0601	684490	687404	-	665.845	595.681	606.296	1002.17	1	0.894624	0.910567	1.50511
CC_0602	687471	690079	-	718.089	607.12	884.328	700.342	1	0.845466	1.2315	0.975286
CC_0603	690176	691701	-	390.601	277.769	329.433	247.792	1	0.711131	0.843399	0.634387
CC_0604	691947	692122	-	62.2367	64.9638	98.4627	137.598	1	1.04382	1.58207	2.21088
CC_0605	692426	692622	-	63.4639	150.431	108.643	129.493	1	2.37034	1.71188	2.04042
CC_0606	692692	692849	-	63.9899	31.079	39.3851	11.7721	1	0.485686	0.615489	0.183968
CC_0607	693406	693452	+	45.5818	22.6618	33.5441	13.3159	1	0.497167	0.735909	0.292133
CC_0608	694042	695372	+	285.412	288.776	365.647	376.706	1	1.01178	1.28112	1.31987
nrtA	695485	696677	+	156.381	122.589	192.253	397.549	1	0.783917	1.22939	2.54219
nrtB	696789	697579	+	176.367	146.546	222.459	389.057	1	0.830918	1.26134	2.20596
nrtD	697692	698377	+	90.4624	65.8271	118.489	94.3696	1	0.727673	1.30982	1.04319
nasT	698482	699104	+	136.22	58.7048	80.439	235.634	1	0.430957	0.59051	1.72981
CC_0613	699248	700242	+	137.797	100.359	197.092	92.4397	1	0.728311	1.43031	0.670838
CC_0614	700355	701697	+	196.878	359.998	250.162	651.131	1	1.82853	1.27064	3.30727
CC_0615	701826	704194	+	282.081	290.934	373.658	395.04	1	1.03138	1.32464	1.40045
nasE	704291	704535	+	28.5763	18.3452	14.8528	9.07029	1	0.641974	0.519761	0.317406
nasC	704636	707214	+	377.452	200.287	472.621	474.164	1	0.530628	1.25213	1.25622
CC_0618	707304	707989	+	199.859	76.1867	162.38	339.074	1	0.381203	0.812474	1.69657
CC_0619	708378	710260	-	494.037	379.639	581.431	762.097	1	0.768442	1.1769	1.54259
CC_0620	710689	712481	+	934.077	577.767	589.441	666.762	1	0.618544	0.631041	0.71382
CC_0621	712578	713830	+	468.09	456.041	446.253	607.709	1	0.974259	0.953348	1.29827
CC_0622	713927	714870	+	172.334	80.9349	139.016	106.721	1	0.469639	0.806664	0.619265
CC_0623	714981	717775	+	870.262	509.782	1009.49	892.169	1	0.58578	1.15999	1.02517
CC_0624	717872	718752	-	422.333	287.049	469.116	438.075	1	0.679675	1.11077	1.03727
CC_0625	718849	719183	-	130.434	161.007	92.9554	92.8257	1	1.23439	0.712662	0.711667
CC_0626	719267	719541	-	124.298	38.2013	73.096	166.353	1	0.307336	0.58807	1.33834
CC_0627	719658	719893	-	80.4694	55.6832	97.6282	147.633	1	0.69198	1.21323	1.83465
CC_0628	720569	721731	+	319.423	344.675	406.701	278.284	1	1.07905	1.27323	0.871208
CC_0629	721999	723044	+	84.5017	87.1939	89.6177	89.5449	1	1.03186	1.06054	1.05968
CC_0630	723141	723394	+	7.36322	4.74818	32.8765	15.4388	1	0.644852	4.46497	2.09674
CC_0631	723556	724640	-	257.713	258.344	477.794	598.253	1	1.00245	1.85398	2.3214
CC_0632	724751	725703	-	95.3712	101.654	108.643	150.721	1	1.06588	1.13916	1.58036
CC_0633	725800	728156	-	254.382	216.042	232.305	460.076	1	0.849284	0.913215	1.8086
CC_0634	728253	728905	-	49.0881	27.1941	122.828	244.319	1	0.553986	2.50219	4.97715
tagG	729015	729706	-	77.4891	47.9135	150.698	141.072	1	0.618325	1.94476	1.82054
CC_0636	729940	730643	-	87.6573	166.618	127.835	330.969	1	1.90079	1.45834	3.77571
CC_0637	730831	731738	+	240.006	137.481	133.008	248.95	1	0.572825	0.554187	1.03727
CC_0638	731937	733084	-	27.5244	29.9999	33.3772	36.8601	1	1.08994	1.21264	1.33918
CC_0639	733150	733445	-	55.3994	135.323	99.464	80.6676	1	2.44268	1.7954	1.45611
733495,,733734	733545	733684	-	3.68161	4.31653	4.50592	78.1588	1	1.17246	1.2239	21.2295
CC_0640	733932	734521	-	0.701259	1.94244	0.667544	0.578954	1	2.76993	0.951922	0.825593
CC_0641	734626	734957	-	0	0.215826	0	0.192985	#DIV/0!	#DIV/0!	#DIV/0!	#DIV/0!
CC_0642	735594	736429	+	122.72	90.2155	85.6125	69.8605	1	0.735131	0.697623	0.569266
CC_0643	736662	737197	-	62.938	71.4385	80.2721	61.9481	1	1.13506	1.27542	0.984272
CC_0644	737294	737931	-	124.473	122.158	175.564	190.09	1	0.981396	1.41045	1.52715
CC_0645	738018	738484	+	40.4977	47.6976	62.2484	27.5968	1	1.17779	1.53709	0.681442
CC_0646	738981	740410	-	296.106	177.194	235.476	364.934	1	0.598411	0.795241	1.23244
CC_0647	740523	741061	-	34.011	34.3164	24.5322	54.8077	1	1.00898	0.721302	1.61147
CC_0648	741158	741675	-	141.654	104.46	105.639	345.25	1	0.737429	0.745751	2.43727
CC_0649	741947	743280	+	248.772	504.818	351.128	312.442	1	2.02924	1.41145	1.25594
CC_0650	743406	743755	-	63.9899	66.6904	76.1	120.615	1	1.0422	1.18925	1.88492
CC_0651	743836	745046	-	536.989	360.214	615.308	407.198	1	0.670804	1.14585	0.758299
CC_0652	745355	747585	+	487.55	427.336	311.576	724.272	1	0.876497	0.639064	1.48553
CC_0653	747754	748211	-	8.06447	4.31653	9.5125	39.9479	1	0.535252	1.17956	4.95356
CC_0654	748610	748851	-	0.350629	0.647479	0.333772	0.771939	1	1.84662	0.951922	2.20158
CC_0655	749216	751200	+	404.802	452.804	524.189	703.236	1	1.11858	1.29493	1.73724
CC_0656	751535	751728	-	15.603	10.1438	15.6873	13.5089	1	0.650121	1.0054	0.86579
CC_0657	751825	754292	-	1365.35	2238.55	1419.2	903.169	1	1.63954	1.03944	0.661492
CC_0658	754564	756098	-	370.791	193.165	516.178	481.69	1	0.520954	1.3921	1.29909
CC_0659	756279	756754	+	75.7359	73.1651	139.517	107.107	1	0.966056	1.84215	1.41421
756955,,757296	757005	757246	-	15.0771	18.7769	32.5427	35.1232	1	1.2454	2.15843	2.32958
CC_0660	757368	757969	-	140.602	78.7766	148.362	186.423	1	0.56028	1.05519	1.32589
CC_0661	758131	758330	+	0.350629	3.88488	2.83706	0	1	11.0797	8.09134	0
CC_0663	759149	761031	-	849.75	514.314	801.386	977.275	1	0.605254	0.943084	1.15007
CC_0665	761661	761770	+	51.5425	33.8847	115.986	189.318	1	0.657414	2.25029	3.67305
CC_0666	761973	762364	-	97.6503	104.028	133.842	119.265	1	1.06532	1.37063	1.22134
CC_0667	762477	762583	+	17.1808	3.88488	22.1958	0	1	0.226117	1.29189	0
CC_0668	762726	762823	+	48.2115	48.5609	40.7202	44.3865	1	1.00725	0.844614	0.920661
CC_0669	763075	763391	-	16.6549	72.086	88.6164	44.1935	1	4.32822	5.32074	2.65349
CC_0670	763640	763953	-	66.6196	34.3164	55.573	147.44	1	0.51511	0.834184	2.21317
CC_0671	764153	765135	-	217.215	158.632	227.966	311.863	1	0.730302	1.0495	1.43574
CC_0672	765232	767060	-	43.8287	46.1869	26.368	13.8949	1	1.0538	0.601615	0.317028
CC_0673	767268	767350	+	1.2272	0	2.00263	0	1	0	1.63187	0
CC_0674	767571	768640	-	586.778	633.451	663.538	433.251	1	1.07954	1.13082	0.738355
CC_0675	768883	769883	+	568.721	494.674	664.707	778.115	1	0.869801	1.16877	1.36818
769938,,770252	769988	770202	-	54.3475	60.2156	93.1223	53.6498	1	1.10797	1.71346	0.987161
CC_0676	770264	770349	+	52.2438	12.5179	39.2182	19.2985	1	0.239606	0.750677	0.369393
770440,,770709	770490	770659	-	46.4584	45.7552	57.9094	117.721	1	0.984864	1.24648	2.5339
CC_0677	770731	771179	+	118.513	41.6545	41.7215	18.1406	1	0.351477	0.352042	0.153069
CC_0678	771441	771541	-	40.1471	79.4241	61.7478	30.6846	1	1.97833	1.53804	0.764305
CC_0680	771762	771778	+	0	0	0	0	#DIV/0!	#DIV/0!	#DIV/0!	#DIV/0!
CC_0679	771937	772733	-	529.626	185.611	397.355	317.46	1	0.350456	0.750257	0.599404
hylD	774444	775585	+	218.793	271.725	215.617	288.319	1	1.24193	0.985483	1.31777
CC_0684	775646	777726	+	391.302	351.15	293.719	278.863	1	0.897387	0.750619	0.712653
CC_0685	777992	779535	-	24.0181	11.0071	5.67412	7.14044	1	0.458285	0.236243	0.297294
CC_0686	779693	779883	-	9.11636	8.41723	6.17478	0.38597	1	0.92331	0.677329	0.0423381
CC_0687	780158	780252	+	227.558	52.6616	109.477	230.424	1	0.23142	0.481095	1.01259
CC_0688	780371	780699	+	37.5173	11.8705	65.0855	82.4045	1	0.316399	1.73481	2.19644
CC_0689	781000	781562	-	58.7304	44.6761	139.85	144.353	1	0.760697	2.38123	2.45789
CC_0690	781713	782920	-	303.294	227.265	265.849	522.024	1	0.749322	0.876539	1.72118
CC_0691	783147	783673	+	46.4584	27.1941	104.137	111.352	1	0.585344	2.24151	2.39682
CC_0692	783846	784909	+	298.386	283.164	268.853	504.462	1	0.948988	0.901026	1.69064
CC_0693	785032	786308	+	245.966	72.7335	246.991	206.88	1	0.295705	1.00417	0.841089
skgA	786484	787151	+	186.535	74.6759	326.929	137.019	1	0.400332	1.75265	0.73455
mutL	787411	789224	-	305.048	362.157	710.767	520.48	1	1.18721	2.33002	1.70623
CC_0696	789437	790389	+	158.309	72.7335	157.54	61.1762	1	0.45944	0.995143	0.386435
CC_0697	790549	791387	+	190.392	135.971	228.3	179.09	1	0.714162	1.19911	0.940639
CC_0698	791541	792349	+	272.614	188.632	253.833	175.23	1	0.691938	0.931108	0.642777
CC_0699, DUF3035	792511	792980	-	7.88916	4.1007	2.3364	0	1	0.519789	0.296154	0
CC_0700	793193	793536	-	6.31133	10.5755	1.66886	3.8597	1	1.67564	0.264423	0.61155
CC_0701	793846	796655	-	201.787	231.366	133.175	232.354	1	1.14658	0.659977	1.15148
CC_0702	797069	798060	-	150.245	126.69	106.807	126.984	1	0.843225	0.710887	0.845181
798253,,798384	798303	798334	-	0	0.431653	0	0	#DIV/0!	#DIV/0!	#DIV/0!	#DIV/0!
CC_0703	798563	799404	-	6.48664	2.58992	4.50592	0	1	0.399269	0.694646	0
CC_0704	799504	799862	-	153.4	96.0428	104.804	151.879	1	0.626092	0.683208	0.990083
CC_0705	799987	800840	-	134.466	124.748	178.568	74.1062	1	0.927724	1.32797	0.551113
CC_0706	800994	801460	+	95.3712	21.7985	65.5862	57.5095	1	0.228565	0.687694	0.603007
CC_0707	801796	801986	+	78.7163	87.4097	89.9515	82.7905	1	1.11044	1.14273	1.05176
CC_0708	802120	802724	-	199.157	271.294	187.079	254.933	1	1.36221	0.939353	1.28006
CC_0709	802821	803446	-	117.461	66.2587	84.4443	174.651	1	0.564092	0.718914	1.48689
tipF	803645	804903	-	154.452	74.8918	158.708	231.003	1	0.484886	1.02756	1.49563
CC_0711	805280	805434	+	22.265	5.39566	2.83706	0	1	0.242339	0.127423	0
CC_0712	805539	807334	+	5.25944	3.45322	1.50197	1.15791	1	0.656576	0.285577	0.220158
CC_0713	807643	808883	-	255.258	212.157	229.134	158.826	1	0.831148	0.897657	0.622219
CC_0714	809042	810258	-	303.645	141.366	279.367	265.161	1	0.465564	0.920045	0.87326
CC_0715	810434	811212	-	164.445	73.1651	235.81	817.677	1	0.444921	1.43397	4.97233
CC_0716	811450	812426	-	334.325	196.834	371.321	268.249	1	0.588749	1.11066	0.802359
CC_0717	812645	813270	-	66.6196	56.5465	126.666	151.3	1	0.848797	1.90134	2.27111
terB	813494	813834	-	2.80503	1.07913	2.00263	0.192985	1	0.384713	0.713941	0.0687994
CC_0719	813892	814070	-	34.1864	47.6976	43.7241	24.3161	1	1.39522	1.27899	0.71128
CC_0720	814306	815264	-	142.005	65.6112	128.335	294.302	1	0.462035	0.903738	2.07248
CC_0721	815485	815951	+	32.2579	85.2514	87.9489	18.3336	1	2.64281	2.72643	0.568343
CC_0722	816251	818625	-	11012.4	14628.3	9565.9	5964.39	1	1.32835	0.868649	0.541607
CC_0723	818860	820460	-	295.055	159.927	469.784	186.23	1	0.542026	1.59219	0.631172
CC_0724	820705	820814	-	7.36322	3.2374	1.50197	0	1	0.439671	0.203983	0
CC_0725	820911	821155	-	10.5189	14.0287	8.17741	39.9479	1	1.33367	0.777403	3.79773
CC_0726	821260	822101	-	6.48664	12.5179	18.6912	29.7197	1	1.9298	2.88149	4.58167
CC_0727	822201	822847	-	0	0.431653	0.333772	0	#DIV/0!	#DIV/0!	#DIV/0!	#DIV/0!
CC_0728	823155	823393	+	43.1274	21.3668	51.234	78.9308	1	0.495435	1.18797	1.83018
CC_0729	823652	824130	-	89.7611	50.2876	112.314	12.93	1	0.560238	1.25126	0.144049
CC_0730	824268	824422	-	34.537	55.2516	69.5914	19.8774	1	1.59978	2.01498	0.57554
CC_0731	824826	824950	+	81.6966	33.4531	72.7622	10.2282	1	0.409479	0.890639	0.125197
CC_0732	825047	825594	+	171.633	134.46	64.2511	97.6503	1	0.783415	0.374351	0.568948
CC_0733	825778	826286	+	331.52	210.431	325.261	213.827	1	0.634745	0.981119	0.64499
CC_0734	826410	826432	+	47.8609	26.5466	43.5572	31.4565	1	0.554662	0.910079	0.657249
CC_0735	827071	827378	-	6.66196	1.29496	2.00263	30.2986	1	0.194381	0.300607	4.548
CC_0736	827655	828886	+	183.029	95.3953	476.626	155.16	1	0.521204	2.60411	0.847735
CC_0737	829367	830376	+	227.033	153.884	190.083	443.093	1	0.677807	0.83725	1.95167
CC_0738	830486	831543	-	173.737	103.813	165.217	122.159	1	0.597527	0.950961	0.703129
CC_0739	831736	835199	-	5667.22	9567.58	5296.46	3820.52	1	1.68823	0.934577	0.674143
CC_0740	835413	837841	-	369.388	280.79	421.554	394.268	1	0.76015	1.14122	1.06735
CC_0741	837996	839728	-	246.843	78.1292	300.728	385.97	1	0.316514	1.2183	1.56362
CC_0742	840335	840696	+	144.81	94.1003	59.7452	77.5799	1	0.64982	0.412576	0.535736
CC_0743	840810	841636	-	305.223	193.165	322.09	368.601	1	0.632864	1.05526	1.20765
cpdR	841888	842144	+	7.71385	0	0	0	1	0	0	0
CC_0745	842539	844124	-	600.979	266.33	504.162	587.832	1	0.44316	0.838902	0.978124
sapA	844500	846376	-	881.482	554.458	712.269	817.29	1	0.629007	0.808036	0.927178
CC_0747	846731	847854	+	354.486	257.481	528.361	255.898	1	0.726349	1.4905	0.721883
CC_0748	848207	849918	-	62.0614	73.381	66.5875	32.4214	1	1.18239	1.07293	0.522409
CC_0749	850049	850491	+	44.3546	43.1653	76.4337	24.3161	1	0.973186	1.72324	0.54822
motA	850604	851370	-	299.788	115.035	185.744	310.127	1	0.383723	0.619584	1.03449
CC_0751	851568	852820	+	150.069	86.3306	98.7964	170.792	1	0.575271	0.658339	1.13808
fixK	852923	853473	-	127.278	119.136	199.596	187.195	1	0.936028	1.56818	1.47075
fixT	853740	854026	+	8.23979	28.2733	46.7281	121.58	1	3.43131	5.67102	14.7553
CC_0754	854123	854979	-	284.36	201.15	207.272	329.232	1	0.707378	0.728907	1.1578
CC_0755	855076	856175	-	285.588	194.244	248.159	473.392	1	0.680155	0.868943	1.65761
CC_0756	856349	857616	+	263.498	268.272	420.219	436.725	1	1.01812	1.59477	1.65741
CC_0757	857826	858919	+	246.142	216.258	324.259	335.408	1	0.878591	1.31737	1.36266
fixJ	859030	859538	-	136.395	35.8272	144.023	173.493	1	0.262673	1.05592	1.27199
fixL	859631	861045	-	7601.12	13904	7634.2	4281.95	1	1.8292	1.00435	0.563331
861100,,861297	861150	861247	-	69.5999	46.4027	52.2353	27.0179	1	0.666706	0.750508	0.388188
cydC	861344	862842	-	120.967	54.3883	55.0723	69.0885	1	0.449612	0.455267	0.571135
cydD	863115	864655	-	100.806	83.5248	89.7846	70.4394	1	0.82857	0.890668	0.698763
cydA	864879	866341	+	535.586	270.646	425.893	396.391	1	0.505327	0.79519	0.740106
cydB	866456	867507	+	325.209	202.877	164.716	611.955	1	0.623836	0.506494	1.88173
867576,,867695	867626	867645	+	29.9788	20.2877	39.552	25.281	1	0.676734	1.31933	0.843296
CC_0764	867841	868259	+	86.7808	53.3091	86.7807	17.9476	1	0.614297	0.999999	0.206815
CC_0765	868424	868809	-	158.484	55.2516	165.384	305.688	1	0.348624	1.04353	1.92882
yihA	869139	869638	-	0.525944	0.215826	0.166886	0	1	0.41036	0.317307	0
yidC	869828	871575	-	369.037	666.04	276.196	163.458	1	1.8048	0.748423	0.442931
CC_0768	871683	872032	-	1.40252	0.431653	0.166886	0.38597	1	0.30777	0.11899	0.275198
CC_0769	872226	872260	-	3.33098	0.647479	0.667544	0	1	0.194381	0.200405	0
CC_0770	872640	873535	-	355.538	145.683	331.435	233.898	1	0.409753	0.932208	0.657869
CC_0771	873794	874836	-	186.009	168.56	265.515	222.704	1	0.906196	1.42743	1.19728
CC_0772	874968	875665	-	318.196	197.697	205.27	207.459	1	0.621305	0.645104	0.651983
CC_0773	875825	876099	-	105.715	72.7335	182.239	102.861	1	0.688017	1.72388	0.973004
CC_0774	876205	877481	-	625.347	455.61	551.725	548.077	1	0.72857	0.882269	0.876436
CC_0775	877807	878030	-	35.2383	87.8414	46.7281	22.7722	1	2.49278	1.32606	0.646235
CC_0776	878323	879674	-	639.197	323.308	667.21	645.727	1	0.505803	1.04382	1.01022
879721,,879912	879771	879862	-	34.537	13.1654	23.6978	0.578954	1	0.381197	0.686157	0.0167633
CC_0777	880006	881234	-	149.017	140.719	406.2	600.762	1	0.944311	2.72586	4.03148
CC_0778	881495	882117	-	159.361	66.6904	138.515	299.705	1	0.418486	0.869192	1.88067
882074,,882181	882124	882131	-	0	0.647479	0	0	#DIV/0!	#DIV/0!	#DIV/0!	#DIV/0!
CC_0779	882273	883345	-	178.47	112.446	223.126	101.124	1	0.630052	1.25022	0.566615
CC_0780	883490	883839	-	35.9395	22.0143	51.5677	50.948	1	0.612537	1.43485	1.4176
CC_0781	884011	884303	-	34.1864	11.4388	22.8634	100.159	1	0.334601	0.668786	2.9298
CC_0782	884491	885242	-	167.426	277.769	203.434	326.53	1	1.65906	1.21507	1.9503
CC_0783	885376	886004	-	99.0528	63.0213	125.331	101.124	1	0.63624	1.2653	1.02091
CC_0784	886267	886775	-	58.3798	11.8705	37.7162	0.192985	1	0.203332	0.646049	0.00330568
CC_0785	886872	887692	-	99.4034	157.553	93.9568	16.0177	1	1.58499	0.945206	0.161139
888079,,891006	888129	890956	+	1299.26	870.86	1160.86	1187.44	1	0.670275	0.893479	0.913934
CC_0787	891183	892597	+	494.212	217.553	425.225	481.497	1	0.440202	0.86041	0.974272
892673,,892915	892723	892865	-	42.4261	12.0863	12.5164	13.7019	1	0.284878	0.295017	0.322959
CC_0788	893004	894553	+	433.729	297.193	637.671	538.428	1	0.685205	1.47021	1.24139
CC_0789	894554	897405	+	1251.4	865.032	1110.46	1077.05	1	0.691254	0.887376	0.860677
CC_0790	897632	898431	-	207.573	61.5105	264.514	245.477	1	0.296333	1.27432	1.18261
CC_0791	898670	899169	+	99.9294	50.2876	86.7807	101.124	1	0.503231	0.86842	1.01195
CC_0792	899712	900433	+	26.8231	37.5538	53.9041	34.9302	1	1.40005	2.00961	1.30224
CC_0793	901084	901805	+	90.6377	216.042	111.814	96.1064	1	2.38358	1.23363	1.06034
CC_0794	902241	902962	+	117.11	197.265	115.485	46.5093	1	1.68444	0.986123	0.397142
CC_0795	903173	904689	-	597.297	544.53	544.382	586.867	1	0.911657	0.911409	0.982537
CC_0796	904950	906862	-	787.689	367.768	546.885	603.656	1	0.466895	0.694291	0.766364
CC_0797	907145	909525	+	261.394	138.129	327.096	182.757	1	0.528431	1.25135	0.699161
CC_0798	909918	911743	+	174.613	84.8198	254.334	418.97	1	0.485758	1.45656	2.39941
CC_0799	911853	913369	-	417.249	239.136	325.261	319.969	1	0.573125	0.779536	0.766853
CC_0800	913559	915183	-	660.936	547.767	773.182	685.482	1	0.828775	1.16983	1.03714
CC_0801; frameshifted variant	915367	916595	-	542.95	291.366	626.99	655.183	1	0.536635	1.15479	1.20671
relE-1	916771	916952	-	97.8256	58.7048	60.4127	96.2994	1	0.600096	0.617555	0.984399
relB-1	917049	917212	-	59.7823	21.7985	67.7557	9.64924	1	0.364631	1.13337	0.161406
CC_0804	917351	920340	-	366.232	245.395	331.936	518.936	1	0.670052	0.906354	1.41696
CC_0805	920886	921253	+	64.3405	27.6258	35.5467	107.878	1	0.429369	0.552478	1.67668
921330,,921674	921380	921624	-	68.3727	26.9783	43.3903	63.106	1	0.394577	0.634615	0.922971
CC_0806	921781	923084	-	249.999	243.021	289.547	208.231	1	0.972087	1.15819	0.832927
acrB2	923186	926241	-	900.767	489.063	955.589	612.92	1	0.54294	1.06086	0.680442
CC_0808	926354	927420	-	354.486	150.215	263.513	354.32	1	0.423755	0.743365	0.999531
CC_0809	927688	928202	+	60.6589	15.1078	21.6952	3.28074	1	0.249062	0.357659	0.0540851
CC_0810	928299	928981	-	58.3798	40.3595	173.394	147.633	1	0.691327	2.97011	2.52884
CC_0811	929196	930688	+	224.578	202.661	172.226	114.247	1	0.902408	0.766888	0.508718
CC_0812	930785	931542	-	101.507	38.4171	89.4508	88.194	1	0.378467	0.881227	0.868845
CC_0813	931783	933305	-	707.219	470.717	759.665	796.255	1	0.665589	1.07416	1.1259
CC_0814	933577	935036	-	255.784	196.834	402.863	238.336	1	0.769531	1.57501	0.931787
CC_0815	935380	937493	+	521.211	585.321	813.903	1030.92	1	1.123	1.56156	1.97794
CC_0816	937726	938537	-	257.537	161.654	328.598	336.758	1	0.627692	1.27593	1.30761
CC_0817	938669	938805	-	6.66196	1.72661	2.3364	6.56148	1	0.259175	0.350708	0.984918
CC_0818	939029	939531	-	115.883	40.1437	162.547	58.6674	1	0.346416	1.40268	0.506264
xylD	939746	941421	-	388.673	151.726	377.83	275.582	1	0.39037	0.972103	0.709034
xylC	941514	942283	-	284.36	139.208	216.117	296.618	1	0.489548	0.760012	1.0431
xylB	942508	943154	-	82.0473	22.8776	138.682	108.264	1	0.278834	1.69027	1.31954
xylA	943260	944596	-	345.721	146.33	253.5	255.898	1	0.423262	0.73325	0.740187
xylX	944713	945767	-	87.6573	27.8416	74.2642	172.142	1	0.317619	0.847211	1.96381
CC_0824	946054	946442	+	96.7737	71.8702	70.259	54.6147	1	0.742662	0.726013	0.564355
CC_0825	946593	947311	-	112.201	96.0428	99.464	123.703	1	0.855985	0.886477	1.10251
CC_0826	947476	950333	-	515.074	181.726	307.237	291.214	1	0.352815	0.59649	0.565382
CC_0827	950499	950836	-	57.5032	40.1437	138.348	33.9653	1	0.698113	2.40592	0.590668
CC_0828	950956	951707	-	66.269	23.9567	116.486	48.6322	1	0.361508	1.75778	0.73386
CC_0829	951804	951958	-	46.4584	42.9495	109.31	59.8253	1	0.924472	2.35286	1.28772
CC_0830	952087	952613	-	111.15	166.618	177.567	148.212	1	1.49904	1.59755	1.33345
bioC	952883	953694	+	1.2272	1.51079	1.50197	0	1	1.23108	1.2239	0
CC_0832	953801	953874	-	12.9733	4.74818	6.84232	0.578954	1	0.365997	0.527416	0.0446267
CC_0833	953953	954257	-	111.325	132.086	163.548	210.932	1	1.18649	1.46911	1.89475
CC_0834	954389	954897	-	27.3491	25.6833	24.0316	58.4744	1	0.939093	0.878697	2.13807
CC_0835	955270	956600	+	114.13	37.1221	41.5546	95.7204	1	0.325262	0.364099	0.838698
CC_0836	956857	959021	+	431.274	249.064	478.796	337.53	1	0.577507	1.11019	0.782635
CC_0837	959441	960900	-	204.592	123.237	98.4627	80.2817	1	0.602354	0.481263	0.392398
CC_0838	960997	961649	-	43.1274	45.1077	69.5914	31.8425	1	1.04592	1.61362	0.738335
CC_0839	961905	962803	-	690.915	461.005	500.658	372.268	1	0.667239	0.72463	0.538804
CC_0840	963095	963753	-	0.701259	0.215826	0.166886	0.192985	1	0.30777	0.237981	0.275198
CC_0841	963856	964142	-	39.4458	108.345	52.0684	90.8958	1	2.74668	1.32	2.30432
CC_0842	964232	964680	-	88.7092	105.107	105.472	113.282	1	1.18485	1.18896	1.277
CC_0843	964987	966134	+	2.62972	2.37409	8.84495	14.4739	1	0.902792	3.36346	5.50395
CC_0844	966417	966781	+	75.0347	33.6689	96.1263	39.1759	1	0.448711	1.28109	0.522104
CC_0845	967006	967259	+	42.2508	20.5035	53.2366	31.8425	1	0.485281	1.26001	0.753653
CC_0846	967363	967739	-	44.5299	72.9493	79.2708	84.7203	1	1.63821	1.78017	1.90255
CC_0847	967897	968810	-	148.842	176.762	155.538	143.388	1	1.18758	1.04498	0.963354
CC_0848	968939	969777	+	178.295	159.496	278.366	117.721	1	0.894561	1.56126	0.660258
CC_0849	970364	972528	+	103.611	99.0643	61.7478	11.9651	1	0.956118	0.595958	0.115481
CC_0850	972788	973752	+	13.8499	10.5755	20.1932	11.9651	1	0.763581	1.45801	0.863912
CC_0851	974034	975085	+	21.739	6.90645	5.84101	0	1	0.317698	0.268688	0
CC_0852	975196	975491	+	74.3334	17.0503	78.937	39.3689	1	0.229376	1.06193	0.529626
CC_0853	975599	975870	-	95.3712	140.935	80.6059	113.089	1	1.47775	0.845181	1.18578
CC_0854	976063	976127	+	0.350629	2.37409	3.00395	2.5088	1	6.77094	8.5673	7.15514
CC_0855	976303	976970	-	54.3475	33.8847	60.2458	73.9132	1	0.623483	1.10853	1.36001
CC_0856	977074	977981	-	24.0181	44.2444	17.6899	6.17551	1	1.84213	0.736524	0.257119
CC_0857	978343	980450	+	309.08	291.581	316.416	311.863	1	0.943386	1.02373	1.00901
CC_0858	980820	981556	-	84.8523	77.2659	117.321	77.7729	1	0.910592	1.38265	0.916568
ibpA	981985	982865	+	26.9985	14.4604	18.0237	0	1	0.5356	0.667582	0
iatA	982988	984435	+	343.792	236.33	329.099	293.144	1	0.687421	0.957262	0.852678
iatP	984532	985430	+	258.063	127.985	206.939	278.477	1	0.495945	0.801891	1.0791
CC_0862	985559	986376	-	184.08	107.913	159.71	162.879	1	0.586229	0.867609	0.884826
CC_0863	986516	987330	-	167.075	161.654	260.342	219.231	1	0.967554	1.55824	1.31217
CC_0864	987427	988055	-	140.602	32.8056	76.2669	257.635	1	0.233322	0.542429	1.83236
CC_0865	988092	989191	-	115.883	98.201	111.647	134.703	1	0.847415	0.963443	1.16241
CC_0866	989316	990010	-	236.5	118.705	294.22	190.476	1	0.501923	1.24406	0.805397
CC_0867	990126	991216	-	404.1	333.668	478.963	427.461	1	0.825705	1.18526	1.05781
CC_0868	991379	991869	-	63.6392	252.517	115.151	144.932	1	3.96794	1.80944	2.27739
CC_0869	991966	992933	-	243.863	208.488	295.221	215.564	1	0.854941	1.2106	0.883956
CC_0870	993083	993159	-	51.8931	3.66905	1.1682	2.31582	1	0.0707039	0.0225117	0.0446267
CC_0871	993338	993765	-	157.257	50.2876	96.9607	75.843	1	0.319779	0.616574	0.482286
CC_0872	993961	994658	+	147.966	88.0572	133.842	264.196	1	0.595119	0.904551	1.78552
parE-1	994759	994949	-	68.548	15.7553	37.3824	16.2107	1	0.229844	0.545347	0.236487
parD-1	995046	995212	-	4.55818	20.2877	10.18	0.192985	1	4.45083	2.23336	0.0423381
CC_0875	995386	996155	+	1.05189	1.07913	0.667544	6.17551	1	1.0259	0.634615	5.87088
996243,,996467	996293	996417	+	2.10378	11.8705	0.333772	0	1	5.64245	0.158654	0
CC_0876	996514	997526	+	5.9607	9.06471	4.00526	25.088	1	1.52075	0.671945	4.20891
CC_0877	997794	998449	+	112.552	74.6759	128.836	64.2639	1	0.663479	1.14468	0.570971
clpB	998648	1001127	+	389.725	167.481	434.738	253.582	1	0.429743	1.1155	0.65067
CC_0879	1001447	1001679	+	123.071	129.064	177.567	61.9481	1	1.0487	1.4428	0.503353
CC_0880	1001789	1001967	-	68.3727	12.7338	15.3535	30.1056	1	0.18624	0.224556	0.440316
CC_0881	1002068	1002510	-	154.277	187.121	183.074	138.563	1	1.21289	1.18666	0.898145
CC_0882	1002715	1003586	-	251.226	159.064	171.726	203.792	1	0.633151	0.68355	0.81119
CC_0883	1003854	1004368	-	19.6352	4.31653	8.01052	0.964924	1	0.219836	0.407967	0.0491424
CC_0884	1004478	1005100	-	13.4992	14.892	95.9594	37.825	1	1.10318	7.10851	2.80201
CC_0885	1005297	1006192	+	78.015	42.5178	91.6204	76.422	1	0.544995	1.17439	0.97958
CC_0886	1006303	1006820	+	46.6337	33.4531	49.3982	28.9477	1	0.717359	1.05928	0.620747
CC_0887	1006896	1007998	+	72.2296	77.6975	105.138	149.37	1	1.0757	1.45561	2.06799
ribH	1008114	1008475	+	49.7894	42.0862	153.702	134.317	1	0.845284	3.08704	2.69771
CC_0889	1008648	1009972	+	231.24	131.87	237.812	250.687	1	0.570273	1.02842	1.0841
CC_0890	1010123	1010544	+	48.2115	11.8705	12.0158	0.578954	1	0.246216	0.24923	0.0120086
CC_0891	1010743	1011629	-	265.777	326.545	415.546	355.478	1	1.22864	1.56351	1.3375
CC_0892	1011860	1012599	+	125.35	60.8631	188.581	176.388	1	0.485545	1.50444	1.40716
CC_0893	1012705	1012874	-	7.53853	8.41723	2.83706	23.9301	1	1.11656	0.376341	3.17437
CC_0894	1013136	1014223	-	183.029	307.337	286.376	197.616	1	1.67917	1.56465	1.0797
CC_0895	1014559	1014962	+	123.071	68.8486	110.812	88.0011	1	0.559422	0.900393	0.715044
CC_0896	1015155	1017088	+	290.146	175.683	415.88	291.986	1	0.605498	1.43335	1.00634
CC_0897	1017201	1018333	-	15.603	4.53235	8.84495	11.1931	1	0.29048	0.566875	0.717369
flgL	1018478	1019301	-	645.859	1136.97	616.977	385.584	1	1.7604	0.955281	0.597009
flaN	1019405	1021416	-	166.023	113.956	212.613	215.178	1	0.686389	1.28062	1.29607
1021867,,1023069	1021917	1023019	+	11.7461	16.8345	8.3443	40.7198	1	1.4332	0.71039	3.46667
CC_0900	1022972	1023603	+	20.6871	21.7985	23.8647	51.141	1	1.05372	1.1536	2.47211
flgD	1023715	1024298	+	67.8468	26.3308	147.694	72.5623	1	0.388092	2.17688	1.0695
flgE	1024545	1026220	+	405.853	441.149	691.575	620.06	1	1.08697	1.704	1.52779
sciP	1026489	1026670	+	7.53853	3.2374	0.83443	0	1	0.429447	0.110689	0
CC_0904	1026791	1026915	+	108.87	23.7409	55.7399	17.1756	1	0.218066	0.511984	0.157762
fliF	1027034	1028598	+	21.2131	126.043	55.7399	31.0705	1	5.94174	2.62762	1.46469
fliG	1028698	1029620	+	14.3758	56.9782	19.3588	95.7204	1	3.96348	1.34662	6.65844
flbE	1029731	1030269	+	18.7587	39.2804	32.3759	164.037	1	2.09399	1.72591	8.7446
fliN	1030385	1030617	+	17.0055	25.6833	25.1998	98.2292	1	1.51029	1.48186	5.77631
flbD	1030751	1032018	+	23.4922	24.1726	64.418	205.722	1	1.02896	2.7421	8.75704
1032152,,1032286	1032202	1032236	-	6.13601	13.3812	9.67938	1.92985	1	2.18077	1.57747	0.314512
flhA	1032386	1034388	+	12.6227	126.906	18.0237	110.194	1	10.0538	1.42788	8.72988
CC_0911	1034528	1035909	+	217.215	239.783	257.171	433.637	1	1.1039	1.18395	1.99635
CC_0912	1036006	1037228	-	249.823	96.4744	232.472	331.741	1	0.38617	0.930545	1.3279
1037402,,1038040	1037452	1037990	+	91.3389	57.194	54.2379	92.0537	1	0.626173	0.593809	1.00783
CC_0914	1038125	1038429	+	149.368	99.2802	264.848	369.566	1	0.664668	1.77312	2.4742
CC_0915	1038530	1038876	-	25.4206	34.3164	53.5704	13.5089	1	1.34994	2.10736	0.531416
CC_0916	1038987	1039303	-	93.4427	41.007	56.7412	178.511	1	0.438847	0.60723	1.91038
CC_0917	1039965	1040563	-	39.0952	44.6761	20.527	24.7021	1	1.14275	0.525051	0.631844
CC_0918	1040769	1041337	+	18.5834	9.71219	6.34166	10.4212	1	0.522628	0.341255	0.56078
CC_0919	1041449	1041969	-	8547.12	12997.1	8403.21	4003.47	1	1.52064	0.983163	0.4684
CC_0920	1042214	1043613	+	311.184	259.208	464.443	443.093	1	0.832973	1.49251	1.4239
CC_0921	1044172	1045832	-	106.767	98.4168	212.112	81.2466	1	0.921794	1.98669	0.760974
CC_0922	1046170	1049090	+	463.006	330.214	585.102	578.761	1	0.713197	1.2637	1.25001
CC_0923	1049198	1049991	-	83.6251	44.4602	146.025	124.861	1	0.531661	1.74619	1.49311
1050185,,1050370	1050235	1050320	+	64.6911	26.7625	87.6151	25.281	1	0.413696	1.35436	0.390796
CC_0924	1050425	1050732	-	25.5959	41.4387	47.2287	68.3166	1	1.61895	1.84516	2.66904
CC_0925	1051438	1054505	+	1273.14	1305.75	1685.55	1691.51	1	1.02562	1.32393	1.32862
CC_0926	1054602	1054894	-	73.2815	18.7769	75.5993	8.68431	1	0.25623	1.03163	0.118506
sppA	1055052	1056286	-	250.349	129.712	260.342	100.738	1	0.518123	1.03991	0.40239
CC_0928	1057419	1057729	+	77.3138	91.0787	134.51	119.651	1	1.17804	1.73979	1.5476
CC_0929	1057844	1058112	+	69.5999	46.1869	45.8936	63.106	1	0.663605	0.659392	0.906697
CC_0930	1058364	1059340	+	65.2171	58.9206	68.9239	184.493	1	0.903454	1.05684	2.82891
lolE	1059445	1060550	+	109.046	66.4745	107.808	97.2643	1	0.609602	0.988652	0.891959
lolD	1060647	1061251	+	19.6352	5.82731	8.3443	0	1	0.296778	0.424965	0
CC_0933	1061672	1062000	+	130.083	64.5321	148.528	85.4923	1	0.496082	1.14179	0.657211
CC_0934	1062221	1063938	-	279.101	142.877	455.599	542.48	1	0.511919	1.63238	1.94367
CC_0935	1064112	1064563	-	345.896	117.625	277.698	279.442	1	0.34006	0.802837	0.807879
CC_0936	1064660	1066752	-	798.909	502.444	787.034	566.796	1	0.628913	0.985136	0.709463
CC_0937	1066873	1067732	+	70.1259	33.4531	74.0973	21.6143	1	0.477044	1.05663	0.308221
CC_0938	1067893	1067996	+	9.46699	4.74818	8.51118	4.43865	1	0.501551	0.899038	0.468855
CC_0939	1068177	1069519	-	207.222	172.661	143.522	356.443	1	0.833218	0.6926	1.7201
CC_0940	1069677	1071508	+	635.165	700.573	700.42	715.78	1	1.10298	1.10274	1.12692
CC_0941	1071632	1072002	-	163.569	71.8702	106.64	86.4572	1	0.439389	0.651959	0.528568
CC_0942	1072164	1072510	-	4220.88	5723.93	3550	2392.24	1	1.3561	0.841057	0.566764
CC_0943	1072675	1073588	-	234.571	149.999	217.619	464.128	1	0.639462	0.927733	1.97863
CC_0944	1073760	1075198	-	549.611	483.02	629.327	402.759	1	0.878838	1.14504	0.732807
CC_0945	1075459	1077026	-	534.184	338.2	810.899	468.953	1	0.633115	1.51801	0.877887
CC_0946	1077292	1078526	+	518.055	205.251	509.503	603.077	1	0.396195	0.983492	1.16412
CC_0947	1078857	1079641	+	206.17	93.8845	262.845	278.863	1	0.455374	1.2749	1.35259
CC_0948	1079965	1081088	+	266.303	111.582	172.059	171.949	1	0.419005	0.646104	0.645691
CC_0949	1081417	1081736	+	121.844	87.4097	241.15	171.563	1	0.717392	1.97918	1.40806
1081948,,1082481	1081998	1082431	+	20.6871	19.6402	36.3811	33.5793	1	0.949392	1.75864	1.6232
1082537,,1082725	1082587	1082675	+	34.1864	5.17983	23.6978	13.3159	1	0.151518	0.693194	0.389511
CC_0950	1083079	1083890	-	17.5315	7.3381	40.2195	0.771939	1	0.418567	2.29413	0.0440316
fliP	1084011	1084711	-	8.59042	41.8703	12.8502	55.3866	1	4.87407	1.49588	6.44749
fliO	1084811	1085031	-	12.0967	3.66905	23.5309	0	1	0.30331	1.94523	0
flgB	1085246	1085589	+	57.8538	54.8199	140.685	89.9309	1	0.947559	2.43173	1.55445
flgC	1085702	1086021	+	95.5465	60.4314	204.769	42.6496	1	0.632482	2.14313	0.446376
fliE	1086132	1086343	+	25.9466	1.72661	5.34035	1.73686	1	0.0665449	0.205821	0.06694
CC_0956	1086546	1086715	-	4.7335	1.94244	6.17478	0.578954	1	0.41036	1.30449	0.12231
CC_0957	1086850	1088414	-	378.68	276.689	414.378	302.986	1	0.730669	1.09427	0.800112
CC_0958	1088639	1089354	-	230.013	52.8775	173.061	309.548	1	0.229889	0.752396	1.34578
CC_0959	1089573	1091014	-	71.5284	43.5969	83.7767	277.512	1	0.609505	1.17124	3.87975
CC_0960	1091099	1092204	-	106.416	73.5968	111.647	203.792	1	0.691595	1.04915	1.91505
CC_0961	1092335	1093668	+	139.726	127.338	107.475	218.459	1	0.911339	0.769182	1.56348
CC_0962	1093765	1094372	+	48.9128	19.2086	36.7149	26.2459	1	0.39271	0.750619	0.536586
CC_0963	1094841	1095235	-	161.991	163.165	176.732	248.371	1	1.00725	1.091	1.53324
CC_0964	1095336	1096948	+	375.699	190.791	216.117	412.987	1	0.507828	0.57524	1.09925
CC_0965	1097045	1097853	+	198.281	220.575	176.732	142.23	1	1.11243	0.891322	0.717315
CC_0966	1098229	1099721	+	287.516	276.042	276.864	279.056	1	0.960092	0.96295	0.970575
CC_0967	1099948	1100771	-	126.577	37.5538	73.9304	182.371	1	0.296687	0.584074	1.44079
CC_0968	1101042	1103218	-	616.056	590.069	610.635	834.466	1	0.957818	0.991202	1.35453
CC_0969	1103382	1104325	-	102.734	27.1941	180.07	45.3514	1	0.264703	1.75277	0.441443
CC_0970	1105061	1108089	+	1086.42	738.99	1180.22	897.186	1	0.680203	1.08633	0.825815
CC_0971	1108416	1109848	+	276.822	259.208	227.465	261.301	1	0.936369	0.821703	0.943933
CC_0972	1109958	1111408	+	396.562	170.719	468.449	629.516	1	0.430497	1.18128	1.58744
CC_0973	1111667	1112061	-	265.602	310.574	241.818	186.23	1	1.16932	0.910452	0.701164
CC_0974	1112174	1112697	-	366.408	301.941	305.401	384.233	1	0.824058	0.833501	1.04865
CC_0975	1112781	1113400	-	445.825	330.862	540.376	378.829	1	0.742134	1.21208	0.849726
CC_0976	1113698	1113963	-	60.4836	50.0717	19.8594	121.773	1	0.827857	0.328344	2.01333
CC_0977	1114072	1115594	+	278.049	129.064	146.526	313.407	1	0.464178	0.526978	1.12717
CC_0978	1115783	1118766	-	473.35	480.645	623.152	624.885	1	1.01541	1.31647	1.32013
CC_0979	1118934	1119451	-	113.429	236.114	202.433	127.563	1	2.08161	1.78467	1.12461
CC_0980	1119700	1121303	+	564.163	404.675	594.614	650.166	1	0.717301	1.05398	1.15244
CC_0981	1121478	1121983	+	104.137	39.0646	38.7175	152.072	1	0.375127	0.371794	1.46031
CC_0982	1122047	1122942	+	76.9631	56.5465	55.7399	151.107	1	0.734722	0.724241	1.96337
CC_0983	1123120	1126490	+	794.877	483.451	1061.23	966.468	1	0.608209	1.33508	1.21587
CC_0984	1126591	1128383	+	420.405	510.861	468.949	273.266	1	1.21517	1.11547	0.650008
CC_0985	1129249	1131998	-	609.744	505.681	654.026	625.464	1	0.829333	1.07262	1.02578
CC_0986	1132180	1132865	-	154.102	89.568	188.915	90.3169	1	0.581227	1.22591	0.586086
CC_0987	1133048	1133397	-	129.558	172.014	138.182	107.686	1	1.3277	1.06656	0.831179
CC_0988	1133666	1134882	+	174.964	127.553	168.722	181.02	1	0.729026	0.964322	1.03461
CC_0989	1134979	1136519	+	572.227	442.228	831.926	665.025	1	0.77282	1.45384	1.16217
CC_0990	1136620	1136654	-	25.7713	31.7265	85.6125	5.40357	1	1.23108	3.32201	0.209674
CC_0991	1137317	1139712	-	814.337	583.811	1081.42	954.31	1	0.716915	1.32798	1.17189
1139759,,1139974	1139809	1139924	-	36.8161	18.3452	17.523	45.9304	1	0.498294	0.475961	1.24756
CC_0992	1140174	1140706	+	119.039	81.1507	192.086	274.424	1	0.681717	1.61364	2.30534
CC_0993	1140799	1141043	-	17.5315	9.06471	28.0368	15.0528	1	0.517054	1.59923	0.858617
CC_0994	1141143	1141696	-	229.312	255.538	263.68	334.443	1	1.11437	1.14988	1.45846
CC_0995	1142287	1144898	+	2256.83	1954.74	1732.61	1824.29	1	0.866146	0.76772	0.808341
CC_0996	1145156	1145319	+	12.9733	48.5609	29.7057	3.28074	1	3.74315	2.28976	0.252884
CC_0997	1145722	1146104	+	77.1385	42.5178	54.2379	260.336	1	0.551188	0.703124	3.37492
CC_0998	1146333	1147861	+	298.736	258.992	286.877	136.247	1	0.866958	0.960302	0.456079
CC_0999	1148407	1151414	+	1303.82	1092.3	1262.16	855.501	1	0.83777	0.96805	0.656152
CC_1000	1151604	1152226	+	159.186	102.518	205.27	72.9482	1	0.644012	1.2895	0.458259
CC_1001	1152251	1153257	+	509.64	333.452	493.315	384.233	1	0.654289	0.967967	0.75393
CC_1002	1153381	1154780	+	600.979	254.675	544.048	462.584	1	0.423767	0.90527	0.769719
CC_1003	1154894	1156098	-	3568.18	6546.23	3253.94	1982.92	1	1.83461	0.911933	0.555723
CC_1004	1156209	1157470	-	314.164	111.582	150.03	114.826	1	0.355172	0.477555	0.365497
CC_1005	1157601	1158997	-	494.037	280.359	394.351	173.686	1	0.567485	0.798223	0.351566
CC_1006	1159180	1159379	-	104.312	74.6759	138.849	187.774	1	0.715889	1.33109	1.80012
rsaA	1159602	1162723	+	895.858	396.041	487.474	107.493	1	0.442081	0.544142	0.119988
rsaD	1163066	1164702	+	137.797	101.654	36.7149	2.31582	1	0.737708	0.266441	0.016806
rsaE	1164870	1166080	+	49.0881	36.2588	21.8621	0.578954	1	0.738648	0.445364	0.0117942
CC_1010	1166320	1167197	+	357.817	196.834	264.514	219.81	1	0.550096	0.739244	0.614307
CC_1011	1167297	1167844	+	34.537	10.1438	88.1158	131.423	1	0.293709	2.55134	3.80527
CC_1012	1167941	1168956	+	531.203	162.733	426.227	512.954	1	0.306348	0.802379	0.965644
CC_1013	1169060	1169997	+	445.299	213.021	385.173	302.214	1	0.478376	0.864975	0.678676
CC_1014	1170108	1171045	+	381.835	217.337	308.238	446.567	1	0.569191	0.807254	1.16953
rsaFa	1171202	1172685	+	441.092	497.912	574.922	62.7201	1	1.12882	1.30341	0.142193
CC_1016	1172891	1173876	-	122.37	71.0069	137.848	27.7898	1	0.580266	1.12649	0.227097
CC_1017	1174205	1175769	+	706.168	473.523	537.373	333.864	1	0.670554	0.76097	0.472782
CC_1018	1176558	1177207	-	166.724	154.532	85.2787	212.283	1	0.92687	0.511495	1.27326
CC_1019	1177349	1178682	-	837.829	587.911	914.535	869.01	1	0.701708	1.09155	1.03722
CC_1020	1178956	1179011	-	16.3043	129.064	45.2261	50.755	1	7.91598	2.77388	3.11299
CC_1021	1179215	1179507	-	65.743	66.4745	111.814	77.7729	1	1.01113	1.70077	1.18298
CC_1022	1179667	1179704	-	20.6871	14.0287	25.3667	19.2985	1	0.678137	1.2262	0.932873
CC_1023	1179899	1180215	-	191.268	75.1076	71.7609	159.984	1	0.392682	0.375185	0.83644
CC_1024	1180326	1180837	-	162.692	89.568	108.976	136.44	1	0.550537	0.669833	0.838641
CC_1025	1181023	1183025	-	596.596	931.075	626.156	718.289	1	1.56065	1.04955	1.20398
CC_1026	1183250	1183941	+	158.66	88.4888	268.019	314.565	1	0.557727	1.68927	1.98264
CC_1027	1184064	1184140	-	1.2272	0.863306	1.33509	0	1	0.703474	1.08791	0
CC_1028	1184304	1184767	+	62.2367	30.6474	55.9068	36.6671	1	0.492432	0.898293	0.589156
CC_1029	1184913	1185592	+	99.7541	83.309	216.284	79.8957	1	0.835144	2.16817	0.800927
CC_1030	1185714	1186648	-	133.765	154.1	145.524	290.249	1	1.15202	1.08791	2.16984
CC_1031	1186935	1188826	+	732.64	836.975	751.988	627.201	1	1.14241	1.02641	0.856083
CC_1032	1188923	1190058	+	699.856	518.847	563.741	634.727	1	0.741362	0.805509	0.906939
CC_1033	1190155	1191062	-	251.577	249.064	152.033	30.1056	1	0.990011	0.604321	0.119668
lepA	1191355	1193063	-	146.738	120.215	291.049	1038.26	1	0.819249	1.98346	7.07557
CC_1035	1193530	1193942	+	284.536	153.021	305.067	100.738	1	0.537792	1.07216	0.354044
CC_1036	1194078	1194505	-	66.0936	86.978	86.9476	125.247	1	1.31598	1.31552	1.895
CC_1037	1194654	1196245	-	604.134	473.739	380.333	417.233	1	0.784162	0.62955	0.69063
CC_1038	1196339	1197609	-	593.09	402.3	448.422	438.268	1	0.678313	0.756079	0.738958
CC_1039	1197785	1198275	-	191.794	121.51	299.727	276.161	1	0.633545	1.56275	1.43988
CC_1040	1198429	1198631	-	17.1808	1.07913	10.8476	34.9302	1	0.0628102	0.631377	2.03309
CC_1041	1198716	1198912	-	16.4796	10.7913	7.84364	1.54388	1	0.65483	0.475961	0.0936843
CC_1042	1199139	1199404	-	116.234	39.7121	134.343	141.265	1	0.341657	1.1558	1.21535
CC_1043	1199583	1201882	-	15.2524	29.784	12.1827	8.49133	1	1.95275	0.798739	0.556722
CC_1044	1202140	1203113	-	0.350629	1.51079	0.500658	0.192985	1	4.30878	1.42788	0.550395
CC_1045	1203462	1203718	-	0.350629	0.863306	0.333772	1.54388	1	2.46216	0.951922	4.40316
CC_1046	1203834	1203934	-	1.40252	1.51079	3.00395	16.5967	1	1.0772	2.14182	11.8335
CC_1047	1204156	1205246	-	251.752	173.74	186.745	154.967	1	0.690125	0.741783	0.615554
CC_1048	1205413	1207241	-	416.197	384.171	583.099	664.254	1	0.923051	1.40102	1.59601
CC_1049	1207474	1207895	-	0.350629	0.215826	2.67017	0	1	0.61554	7.61538	0
CC_1050	1208267	1208766	+	131.135	90.6471	261.51	118.493	1	0.691248	1.9942	0.90359
CC_1051	1209022	1209893	-	60.4836	23.7409	43.2234	0.964924	1	0.392518	0.714631	0.0159535
CC_1052	1209990	1211062	-	3.15566	2.80574	28.3706	19.1055	1	0.889113	8.99037	6.05435
CC_1053	1211218	1211990	+	52.7697	85.2514	31.7083	144.739	1	1.61554	0.600881	2.74283
parD-2	1212149	1212318	+	12.272	6.90645	17.1892	6.3685	1	0.562779	1.40069	0.518944
parE-2	1212422	1212540	+	37.6927	48.3451	34.7123	77.9659	1	1.28261	0.920929	2.06846
CC_1055	1212701	1213461	-	228.26	153.884	212.78	137.019	1	0.674163	0.932182	0.600278
CC_1056	1214031	1215721	+	577.136	432.732	478.462	609.446	1	0.749792	0.829028	1.05598
CC_1057	1215824	1216650	+	411.814	293.956	486.973	436.725	1	0.713806	1.18251	1.06049
CC_1058	1217078	1217346	+	160.413	31.2948	62.0816	53.0708	1	0.195089	0.387011	0.330839
CC_1059	1217446	1218080	+	1.40252	1.51079	14.5191	11.1931	1	1.0772	10.3522	7.98073
CC_1060	1218189	1219036	-	284.886	216.69	270.021	325.372	1	0.760618	0.947821	1.14211
CC_1061	1219129	1219454	-	7.36322	7.3381	6.50855	37.825	1	0.996589	0.883928	5.13702
CC_1062	1219597	1220288	-	121.142	112.877	103.469	66.3868	1	0.931773	0.854112	0.548006
divJ	1220540	1222242	+	11.9214	18.3452	112.314	3.47373	1	1.53885	9.42123	0.291386
CC_1064	1222355	1223145	-	226.857	82.014	155.705	135.861	1	0.361523	0.686355	0.598885
CC_1065, DUF1491	1223314	1223543	+	8.76573	4.53235	2.50329	1.73686	1	0.517054	0.285577	0.198142
CC_1066	1223772	1224052	+	93.0921	83.0932	79.4377	30.8776	1	0.892591	0.853324	0.331688
CC_1067	1224240	1224433	-	4.55818	11.6546	53.9041	19.8774	1	2.55686	11.8258	4.36082
CC_1068	1224543	1225957	+	706.518	743.522	663.371	632.411	1	1.05237	0.93893	0.895109
1226141,,1227676	1226191	1227626	+	722.647	299.135	667.21	269.6	1	0.413944	0.923286	0.373072
CC_1070	1227737	1229241	+	85.0276	55.6832	86.9476	27.9828	1	0.654884	1.02258	0.329102
CC_1071	1229390	1230333	-	569.072	317.049	530.197	450.041	1	0.557134	0.931687	0.790833
CC_1072	1230798	1231177	-	110.624	85.0356	79.2708	122.159	1	0.768693	0.716581	1.10428
1231262,,1231522	1231312	1231472	-	65.2171	54.8199	51.5677	32.6144	1	0.840576	0.790709	0.50009
CC_1073	1231605	1232953	-	105.013	86.1147	47.0618	83.1764	1	0.820035	0.44815	0.792055
CC_1074	1233104	1233306	+	38.9199	48.5609	59.4114	18.9125	1	1.24772	1.52651	0.485935
fliQ	1233554	1233720	+	53.2957	39.7121	23.5309	21.2283	1	0.745127	0.441516	0.398312
fliR	1233835	1234490	+	10.8695	10.5755	16.5217	47.4743	1	0.97295	1.52	4.36765
flhB	1234600	1235585	+	22.0896	7.12227	10.6807	136.054	1	0.322426	0.483516	6.15919
cckA	1235788	1237763	+	14.7264	9.28054	11.5151	33.0004	1	0.630196	0.781936	2.2409
CC_1079	1237918	1238348	-	209.326	154.963	258.006	131.809	1	0.740298	1.23256	0.629682
CC_1080	1238570	1238883	-	149.017	47.6976	72.4285	112.51	1	0.320081	0.48604	0.755013
CC_1081	1239022	1239305	-	5.78538	15.3237	7.84364	0.192985	1	2.64869	1.35577	0.0333573
CC_1082	1239450	1240240	-	343.617	227.697	301.396	318.425	1	0.662648	0.877128	0.926686
CC_1083	1240397	1240818	-	112.903	89.3521	89.7846	23.7371	1	0.791409	0.795239	0.210244
CC_1084	1240987	1241264	+	109.747	63.8846	75.4324	100.545	1	0.582108	0.68733	0.916153
CC_1085	1241468	1243191	+	937.583	568.487	855.624	812.08	1	0.606332	0.912585	0.866142
CC_1086	1243342	1244885	-	133.064	91.0787	229.635	107.107	1	0.684474	1.72575	0.804926
recA	1245213	1246183	+	307.327	204.819	141.519	32.8074	1	0.666455	0.460485	0.106751
CC_1088	1246970	1247346	+	384.991	261.366	248.66	182.95	1	0.678888	0.645885	0.475205
CC_1089	1247807	1248189	-	119.039	161.007	149.363	98.6152	1	1.35256	1.25474	0.82843
CC_1090	1248319	1248611	-	110.448	25.8992	104.971	8.68431	1	0.234491	0.950411	0.0786279
CC_1091	1248734	1250238	-	727.556	363.668	746.981	437.882	1	0.499848	1.0267	0.601854
1250267,,1250557	1250317	1250507	+	91.6896	14.0287	28.7044	73.1412	1	0.153002	0.31306	0.797705
CC_1092	1250604	1251052	+	183.73	225.539	207.773	102.282	1	1.22756	1.13086	0.556698
1251192,,1251368	1251242	1251318	+	0	0	0.166886	0	#DIV/0!	#DIV/0!	#DIV/0!	#DIV/0!
CC_1093	1251421	1253957	-	980.184	756.903	974.447	691.657	1	0.772205	0.994146	0.70564
CC_1094	1254066	1254661	+	11.5708	27.41	53.5704	34.7373	1	2.3689	4.6298	3.00216
CC_1095	1254770	1255653	+	147.089	63.6688	259.674	187.002	1	0.432859	1.76542	1.27135
CC_1096	1255764	1256485	+	141.83	111.151	140.518	121.001	1	0.783691	0.990752	0.853147
CC_1097	1256587	1257767	+	74.8594	67.7695	104.471	159.791	1	0.905291	1.39556	2.13455
CC_1098	1257907	1258541	+	16.1289	20.2877	21.5283	59.6323	1	1.25784	1.33476	3.69722
CC_1099	1258855	1261760	+	982.113	892.658	1477.61	1007.19	1	0.908916	1.50452	1.02553
CC_1100	1261936	1262621	+	121.142	60.6472	187.413	243.74	1	0.500627	1.54705	2.01201
CC_1101	1262892	1264306	+	609.569	587.911	388.677	842.572	1	0.96447	0.637626	1.38224
CC_1102	1264300	1266659	+	453.714	298.488	369.485	120.615	1	0.657876	0.814357	0.26584
CC_1103	1267008	1268263	+	295.405	252.301	211.778	127.756	1	0.854085	0.716907	0.432477
1268426,,1268554	1268476	1268504	-	7.01259	10.3597	3.17083	0	1	1.4773	0.452163	0
CC_1104	1268570	1269816	+	173.036	102.302	127.668	136.633	1	0.591218	0.737812	0.789625
CC_1105	1269988	1272191	+	541.196	222.301	661.869	258.214	1	0.410759	1.22297	0.477116
CC_1106	1272639	1279978	+	395.335	590.285	423.723	343.513	1	1.49313	1.07181	0.868917
CC_1107	1280233	1282151	+	588.531	428.2	599.12	468.567	1	0.727573	1.01799	0.796163
CC_1108	1282230	1284568	+	418.301	276.689	532.7	447.725	1	0.661461	1.27348	1.07034
CC_1109	1284674	1285371	-	139.025	17.6978	116.153	63.878	1	0.1273	0.835483	0.459473
CC_1110	1285471	1286534	-	460.026	341.869	645.848	807.062	1	0.743152	1.40394	1.75439
CC_1111	1286634	1287733	-	89.7611	91.7262	100.966	62.3341	1	1.02189	1.12483	0.694444
CC_1112	1287929	1288641	-	71.0024	60.8631	105.472	246.442	1	0.857197	1.48547	3.47089
CC_1113	1288760	1291305	-	912.688	586.185	952.418	1056.98	1	0.642262	1.04353	1.15809
shpA	1291803	1292041	+	59.7823	34.1006	15.1866	38.404	1	0.570412	0.254032	0.642397
CC_1115	1292252	1292994	+	68.1974	18.9927	41.2208	68.1236	1	0.278496	0.604434	0.998918
CC_1116	1293231	1293496	-	88.3586	75.9709	88.4495	166.932	1	0.859802	1.00103	1.88925
CC_1117	1293620	1294476	-	85.2029	73.381	88.1158	439.233	1	0.861249	1.03419	5.15514
CC_1118	1294762	1295585	+	62.938	70.1436	98.4627	11.5791	1	1.11449	1.56444	0.183976
1295632,,1295991	1295682	1295941	+	6.13601	10.5755	9.84627	14.6668	1	1.72351	1.60467	2.39029
CC_1119	1296048	1297606	+	196.002	136.402	180.237	308.39	1	0.695924	0.919567	1.5734
CC_1120	1297690	1298096	+	45.7571	56.9782	121.493	23.7371	1	1.24523	2.65517	0.518763
CC_1121	1298196	1298830	+	125.35	150.863	145.858	126.984	1	1.20353	1.16361	1.01304
CC_1122	1299058	1301135	-	814.161	499.422	945.409	1074.54	1	0.613419	1.16121	1.31981
CC_1123	1301328	1301752	-	69.2493	173.309	102.301	125.633	1	2.50268	1.47729	1.81421
CC_1124	1302043	1302536	+	168.127	157.553	211.278	187.581	1	0.93711	1.25666	1.11571
CC_1125	1302655	1303583	+	323.982	379.423	486.305	240.073	1	1.17112	1.50103	0.741008
CC_1126	1303691	1304037	+	29.2776	49.4243	23.1971	56.9305	1	1.68813	0.792318	1.94451
CC_1127	1304143	1304393	-	9.11636	5.17983	32.3759	14.4739	1	0.568191	3.5514	1.58768
CC_1128	1304755	1304966	+	53.9969	33.0214	13.8515	22.9652	1	0.611543	0.256524	0.425306
CC_1129	1305284	1305690	+	33.4851	56.9782	29.0381	51.141	1	1.7016	0.867196	1.52728
CC_1130	1305787	1306610	+	88.008	66.6904	38.2169	95.5275	1	0.757776	0.434243	1.08544
CC_1131	1306786	1309616	+	1095.02	1024.53	1413.86	976.503	1	0.935629	1.29118	0.891771
CC_1132	1309822	1311251	+	281.906	146.978	238.313	280.021	1	0.521372	0.845364	0.993313
CC_1133	1311373	1312508	-	357.467	173.74	324.426	380.566	1	0.486032	0.907571	1.06462
CC_1134	1312605	1313428	-	171.808	127.769	135.178	264.582	1	0.743673	0.786793	1.53998
CC_1135	1313510	1315383	-	457.045	330.43	806.059	703.236	1	0.72297	1.76363	1.53866
CC_1136	1315550	1317903	-	3642.86	5548.47	3845.38	2411.54	1	1.52311	1.05559	0.66199
CC_1137	1318154	1319079	-	222.299	100.791	267.685	308.583	1	0.453403	1.20417	1.38814
CC_1138	1319319	1321198	+	263.673	228.776	240.149	557.726	1	0.86765	0.910782	2.11522
CC_1139	1321350	1321420	-	8.23979	8.63306	10.8476	7.52641	1	1.04773	1.31649	0.913422
CC_1140	1321718	1322520	+	202.138	180.863	147.193	212.862	1	0.894749	0.728183	1.05305
CC_1141	1322617	1323386	+	447.228	463.379	329.933	381.145	1	1.03611	0.73773	0.852239
CC_1142	1323529	1325684	-	1499.12	1995.53	1336.76	1088.82	1	1.33114	0.891696	0.726308
CC_1143	1325852	1326276	-	156.205	58.0573	197.593	105.756	1	0.371673	1.26496	0.677029
CC_1144	1326373	1328696	-	722.647	514.746	740.139	753.606	1	0.712306	1.02421	1.04284
CC_1145	1328884	1330766	-	374.472	513.451	494.149	575.481	1	1.37113	1.31959	1.53678
CC_1146	1330941	1331788	-	295.405	204.172	622.651	401.022	1	0.691158	2.10779	1.35753
CC_1147	1332022	1332908	+	24.5441	15.5395	21.5283	29.7197	1	0.633127	0.877128	1.21087
CC_1148	1333010	1333647	+	159.361	130.575	270.021	363.583	1	0.819366	1.6944	2.28151
yocF	1333744	1334825	+	172.159	170.719	192.92	436.918	1	0.991634	1.12059	2.53787
yocG	1334922	1335427	+	120.441	42.7336	22.1958	141.844	1	0.354809	0.184288	1.1777
CC_1151	1335537	1336588	+	295.055	259.208	295.054	406.812	1	0.878507	0.999999	1.37877
CC_1152	1336914	1337575	+	92.9168	51.3667	41.0539	5.98253	1	0.552825	0.441836	0.0643859
CC_1153	1337837	1338612	-	186.009	269.999	135.678	89.9309	1	1.45154	0.729418	0.483476
CC_1154	1338616	1339670	-	59.2564	37.1221	78.2695	111.545	1	0.626467	1.32086	1.88242
CC_1155	1339770	1340731	-	68.0221	143.309	48.7307	22.1932	1	2.1068	0.716395	0.326265
CC_1156	1340828	1341948	-	2.80503	4.53235	16.1879	0.964924	1	1.61579	5.77103	0.343997
CC_1157	1342045	1342382	-	119.214	131.654	153.201	113.089	1	1.10435	1.28509	0.948623
CC_1158	1342588	1343405	-	99.0528	61.9422	138.849	80.8606	1	0.625345	1.40177	0.816339
CC_1159	1343582	1344609	+	188.639	68.417	198.427	10.8071	1	0.362688	1.05189	0.0572902
CC_1160	1344628	1345520	+	23.1415	39.2804	55.2392	0.38597	1	1.6974	2.38702	0.0166786
CC_1161	1345617	1346398	+	112.026	73.8126	94.4574	106.335	1	0.658888	0.843173	0.949195
CC_1162	1346567	1347681	-	234.746	153.884	323.926	196.844	1	0.655534	1.3799	0.838541
CC_1163	1347785	1347945	-	35.5889	33.8847	71.594	138.37	1	0.952116	2.0117	3.88801
CC_1164	1348113	1348966	-	50.14	77.05	83.1092	49.9831	1	1.5367	1.65754	0.99687
CC_1165	1349056	1350674	-	191.444	108.345	173.561	159.984	1	0.565936	0.906592	0.835674
CC_1166	1350779	1352010	-	25.4206	36.2588	50.0658	3.8597	1	1.42635	1.96949	0.151833
CC_1167	1352107	1353134	-	342.39	115.035	249.494	255.512	1	0.335978	0.728686	0.746261
CC_1168	1353236	1353768	-	60.8342	33.6689	76.4337	122.931	1	0.553454	1.25643	2.02076
CC_1169	1354031	1354998	+	144.81	83.7407	165.551	316.495	1	0.57828	1.14323	2.18559
CC_1170	1355095	1355624	+	84.677	18.3452	57.4087	26.2459	1	0.21665	0.677973	0.309954
CC_1171	1355721	1356973	-	416.372	367.552	288.212	931.345	1	0.882749	0.692198	2.23681
CC_1172	1357145	1358700	+	429.521	301.078	745.813	767.886	1	0.700962	1.73638	1.78777
CC_1173	1358788	1359704	+	199.683	95.8269	154.703	203.02	1	0.479894	0.774742	1.01671
CC_1174	1359809	1360188	-	20.1612	76.6184	52.0684	21.0353	1	3.80029	2.58261	1.04336
CC_1175	1360303	1361111	-	153.05	133.165	160.21	335.794	1	0.870076	1.04679	2.19402
CC_1176	1361298	1362289	+	340.461	193.165	283.873	474.936	1	0.567362	0.83379	1.39498
CC_1177	1362453	1362985	+	57.3279	53.525	31.5414	38.9829	1	0.933663	0.550193	0.679999
CC_1178	1363149	1363282	-	22.7909	14.2445	28.2037	1.92985	1	0.62501	1.2375	0.0846762
CC_1179	1363379	1363488	-	12.0967	1.51079	14.8528	8.68431	1	0.124892	1.22784	0.717907
CC_1180	1363686	1364404	-	48.0362	111.151	72.0947	3.66671	1	2.31389	1.50084	0.0763322
CC_1181	1364527	1365854	-	186.359	61.7264	151.532	54.8077	1	0.331222	0.813119	0.294096
CC_1182	1365951	1366615	-	187.411	195.539	186.245	152.265	1	1.04337	0.993774	0.812464
CC_1183	1366806	1367527	-	46.809	46.1869	66.4206	215.371	1	0.986708	1.41897	4.60106
CC_1184	1367657	1369197	-	159.361	80.0716	366.148	1031.31	1	0.502454	2.2976	6.47154
CC_1185	1369352	1371723	+	261.044	204.819	352.296	373.04	1	0.784617	1.34957	1.42903
CC_1186	1371963	1372270	-	46.809	77.6975	112.314	85.2993	1	1.65988	2.39941	1.82228
CC_1187	1372680	1373371	-	86.9561	57.4098	131.506	229.652	1	0.660216	1.51233	2.64101
CC_1188	1373477	1374288	-	90.6377	52.4458	68.2563	87.2291	1	0.578631	0.753068	0.962393
CC_1189	1374406	1375799	-	328.89	108.777	467.447	362.618	1	0.330738	1.42129	1.10255
CC_1190	1376043	1376578	+	185.658	150.431	221.958	245.477	1	0.810258	1.19552	1.3222
CC_1191	1376683	1377389	+	144.459	216.258	220.456	160.563	1	1.49702	1.52608	1.11148
CC_1192	1377432	1378372	+	84.151	96.9061	51.0671	55.9656	1	1.15157	0.60685	0.665061
CC_1193	1378469	1379127	+	22.4403	22.8776	74.9318	36.2811	1	1.01949	3.33916	1.61679
CC_1194	1379231	1381230	-	740.705	516.041	907.692	855.501	1	0.696689	1.22544	1.15498
dapA	1381521	1382368	+	0.175315	0	0.166886	0	1	0	0.951922	0
smpB	1382468	1382826	+	0.701259	2.58992	0.83443	9.64924	1	3.69324	1.1899	13.7599
CC_1197	1383027	1383076	-	31.0307	7.76975	56.7412	99.0012	1	0.250389	1.82855	3.19043
CC_1198	1383614	1384509	-	190.392	100.791	253.833	231.968	1	0.529387	1.33322	1.21837
CC_1199	1384606	1385462	-	209.326	249.495	291.049	173.107	1	1.1919	1.39041	0.826976
CC_1200	1385559	1386121	-	86.4301	95.8269	143.522	74.8781	1	1.10872	1.66055	0.866342
CC_1201	1386376	1387049	+	198.807	263.74	218.454	234.669	1	1.32661	1.09882	1.18039
CC_1202	1387188	1387837	+	126.753	85.4673	100.465	99.5802	1	0.674285	0.79261	0.785627
CC_1203	1388056	1389071	+	122.37	136.618	157.373	89.9309	1	1.11644	1.28605	0.734912
acrB3	1389171	1392214	+	2772.78	4098.33	2466.57	1359	1	1.47806	0.889568	0.490122
CC_1205	1392330	1394584	+	387.796	399.279	508.835	586.288	1	1.02961	1.31212	1.51185
CC_1206	1394817	1395211	-	84.5017	55.4674	106.473	66.7727	1	0.656406	1.26001	0.790194
CC_1207	1395426	1395448	-	0.175315	0	0	0	1	0	0	0
CC_1208	1395647	1395903	-	156.03	84.604	44.5585	67.5447	1	0.542229	0.285577	0.432895
CC_1209	1396000	1396637	-	107.117	124.1	177.066	60.9832	1	1.15855	1.65301	0.569312
CC_1210	1396815	1397272	-	57.5032	30.8632	40.5533	38.211	1	0.536721	0.705235	0.664502
CC_1211	1397602	1398005	+	51.8931	20.5035	85.7793	1.35089	1	0.39511	1.653	0.0260322
CC_1212	1398162	1398271	+	1.40252	9.71219	7.00921	0	1	6.92483	4.99759	0
CC_1213	1398520	1398953	+	85.9042	132.517	96.6269	158.248	1	1.54262	1.12482	1.84214
CC_1214	1399061	1399392	-	28.401	20.2877	40.887	0.38597	1	0.71433	1.43964	0.01359
CC_1215	1399497	1399858	-	187.587	55.4674	128.669	106.142	1	0.295689	0.685918	0.565827
CC_1216	1400135	1401558	-	309.606	287.697	410.039	333.092	1	0.929236	1.32439	1.07586
CC_1217	1401767	1402560	+	7.71385	2.15826	9.34561	20.4564	1	0.279791	1.21154	2.65191
CC_1218	1402660	1402919	+	28.5763	16.187	37.8831	18.3336	1	0.566448	1.32568	0.641565
CC_1219	1403036	1404342	+	160.588	207.841	243.987	302.407	1	1.29425	1.51933	1.88312
CC_1220	1404443	1404921	-	102.734	52.6616	75.7662	166.353	1	0.5126	0.737496	1.61925
CC_1221	1405049	1405731	-	156.205	157.769	136.179	79.1238	1	1.01001	0.871794	0.506537
CC_1222	1405863	1406848	-	19.8106	93.4528	12.1827	78.3518	1	4.71732	0.614958	3.95505
CC_1223	1407114	1408504	+	294.704	289.423	282.037	384.426	1	0.982081	0.957019	1.30445
CC_1224	1408675	1409618	+	272.088	138.561	392.849	81.0536	1	0.509248	1.44383	0.297894
CC_1225	1409625	1410721	+	329.767	204.819	357.303	264.775	1	0.621103	1.0835	0.802916
CC_1226	1410707	1411554	+	1012.09	974.456	618.145	389.057	1	0.962814	0.61076	0.384409
CC_1227	1411651	1412540	-	199.508	81.1507	172.393	144.546	1	0.406754	0.864091	0.72451
CC_1228	1412672	1412889	+	147.966	31.9423	104.304	66.1938	1	0.215877	0.704919	0.447359
CC_1229	1412991	1413883	-	409.535	165.539	551.892	436.339	1	0.404212	1.34761	1.06545
CC_1230	1414100	1415217	+	337.13	207.841	648.185	241.231	1	0.6165	1.92265	0.715543
CC_1231	1415308	1415585	-	60.3083	23.0934	52.0684	0.771939	1	0.382923	0.863371	0.0127999
CC_1232	1415795	1416801	+	359.921	115.683	281.37	187.967	1	0.321412	0.781754	0.522246
CC_1233	1416898	1417808	+	135.343	182.589	182.239	40.7198	1	1.34909	1.3465	0.300864
CC_1234	1417905	1418230	+	10.8695	13.1654	31.8752	0.964924	1	1.21122	2.93253	0.0887734
CC_1235	1418391	1418722	-	62.938	49.6401	52.9028	53.4568	1	0.788714	0.840555	0.849357
CC_1236	1418780	1419174	+	81.5213	55.6832	119.657	63.878	1	0.683051	1.4678	0.783574
CC_1237	1419304	1419944	-	141.479	117.841	181.739	70.8254	1	0.832924	1.28456	0.500607
stpX	1420168	1421996	-	253.68	105.539	199.429	158.633	1	0.416032	0.786142	0.625328
CC_1239	1422204	1422940	-	21.5637	3.2374	2.50329	9.45625	1	0.150132	0.116088	0.438526
CC_1240	1423538	1424628	+	74.8594	62.158	129.003	137.405	1	0.83033	1.72327	1.83551
CC_1241	1424821	1425350	+	314.515	175.899	189.749	149.756	1	0.55927	0.603308	0.47615
fdhD	1425612	1426408	+	20.8624	79.4241	53.2366	33.1934	1	3.80704	2.55179	1.59106
CC_1243	1426508	1428696	+	423.034	432.084	538.875	606.165	1	1.02139	1.27383	1.4329
CC_1244	1428802	1429898	+	382.011	271.294	329.433	547.691	1	0.710173	0.862365	1.43371
CC_1245	1430111	1430850	+	71.1778	26.3308	71.594	92.2467	1	0.36993	1.00585	1.296
CC_1246	1431179	1431279	+	5.9607	8.84888	6.00789	5.78954	1	1.48454	1.00792	0.971286
rpsJ	1431393	1431601	+	0	0	0	0.192985	#DIV/0!	#DIV/0!	#DIV/0!	#DIV/0!
rplC	1431679	1432382	+	1.92846	1.72661	1.00132	1.54388	1	0.895331	0.51923	0.800575
rplD	1432482	1433020	+	0.175315	0	0	0	1	0	0	0
rplW	1433120	1433316	+	0.525944	0	0	0.38597	1	0	0	0.73386
rplB	1433420	1434159	+	0.525944	2.15826	1.00132	0.192985	1	4.1036	1.90384	0.36693
rpsS	1434263	1434441	+	0.175315	0	0	0.38597	1	0	0	2.20158
rplV	1434544	1434824	+	1.57783	0	0.500658	0.771939	1	0	0.317307	0.48924
rpsC	1434924	1435576	+	0.350629	0.215826	0.333772	0	1	0.61554	0.951922	0
rplP	1435690	1436021	+	0.876573	0.431653	0.166886	0	1	0.492432	0.190384	0
rpmC	1436127	1436218	+	0	0.215826	0	0	#DIV/0!	#DIV/0!	#DIV/0!	#DIV/0!
rpsQ	1436329	1436468	+	1.40252	2.37409	0.83443	0.38597	1	1.69274	0.594951	0.275198
rplN	1436586	1436854	+	0.175315	0	0	0	1	0	0	0
rplX	1436954	1437168	+	0.175315	0.215826	0	0.38597	1	1.23108	0	2.20158
rplE	1437261	1437718	+	0.701259	0.215826	0.333772	0.192985	1	0.30777	0.475961	0.275198
rpsN	1437840	1438045	+	0.701259	0.647479	0.500658	0	1	0.92331	0.713942	0
rpsH	1438156	1438454	+	0	0	0	0.578954	#DIV/0!	#DIV/0!	#DIV/0!	#DIV/0!
rplF	1438573	1439006	+	0	0.215826	0	0	#DIV/0!	#DIV/0!	#DIV/0!	#DIV/0!
rplR	1439110	1439360	+	0.525944	0	0.667544	0.192985	1	0	1.26923	0.36693
rpsE	1439471	1439976	+	0.350629	0.431653	0	0.192985	1	1.23108	0	0.550395
rpmD	1440080	1440165	+	0	0	0	0	#DIV/0!	#DIV/0!	#DIV/0!	#DIV/0!
rplO	1440438	1440823	+	0.350629	1.07913	0.333772	0.192985	1	3.0777	0.951922	0.550395
secY	1441143	1442398	+	0.701259	0.215826	0.333772	0.771939	1	0.30777	0.475961	1.10079
adk	1442633	1443108	+	11.9214	10.5755	7.17609	49.7901	1	0.887102	0.601951	4.17653
rpsM	1443455	1443723	+	0.525944	0.647479	0	0	1	1.23108	0	0
rpsK	1443837	1444126	+	0	0	0.667544	0	#DIV/0!	#DIV/0!	#DIV/0!	#DIV/0!
rpoA	1444304	1445220	+	3.50629	5.39566	1.33509	1.15791	1	1.53885	0.380769	0.330237
1445267,,1445473	1445317	1445423	-	11.2201	6.69062	1.83574	0.578954	1	0.596304	0.163612	0.0515996
rplQ	1445525	1445838	+	1.57783	3.45322	9.01184	5.40357	1	2.18859	5.71153	3.42468
1446332,,1446724	1446382	1446674	-	47.335	34.9639	59.2445	39.3689	1	0.738648	1.2516	0.831709
CC_1275	1446941	1447671	-	6396.36	9342.69	5465.51	3194.86	1	1.46063	0.854473	0.499482
CC_1276	1447771	1448654	-	140.427	311.438	126.833	50.369	1	2.21779	0.903197	0.358685
CC_1277	1448860	1449989	+	226.857	133.597	156.372	205.143	1	0.588902	0.689297	0.904282
CC_1278	1450159	1451681	+	482.115	276.258	271.19	288.126	1	0.573012	0.562499	0.597629
CC_1279	1451852	1452207	+	145.336	85.4673	228.967	136.44	1	0.588067	1.57544	0.938792
CC_1280	1452304	1452533	+	37.5173	13.1654	29.0381	55.0007	1	0.350915	0.773993	1.46601
CC_1281	1452611	1454271	+	342.74	214.1	272.525	380.952	1	0.624671	0.795135	1.11149
CC_1282	1454464	1455782	+	191.619	78.345	263.346	115.405	1	0.408858	1.37432	0.602262
CC_1283	1456001	1457202	+	243.863	263.74	187.079	177.932	1	1.08151	0.767149	0.72964
CC_1284	1457299	1458011	+	128.506	76.8342	243.82	316.495	1	0.597905	1.89735	2.46289
CC_1285	1458098	1458534	+	126.928	81.3666	168.722	81.6326	1	0.641046	1.32927	0.643142
CC_1286	1458795	1459477	+	58.3798	27.6258	81.4403	97.4573	1	0.473208	1.39501	1.66937
CC_1287	1459764	1460344	+	171.282	74.6759	150.531	173.686	1	0.435981	0.878847	1.01403
CC_1288	1460408	1461033	+	121.493	61.9422	92.4548	144.546	1	0.509841	0.760988	1.18974
CC_1290	1461362	1461984	+	174.964	277.769	160.544	192.599	1	1.58758	0.917584	1.10079
CC_1291	1462357	1462667	+	73.1062	83.0932	138.348	121.194	1	1.13661	1.89243	1.65779
CC_1292	1462782	1463050	+	66.9702	43.3811	46.2274	66.0008	1	0.647767	0.690268	0.985525
CC_1293	1463278	1463906	-	238.603	95.6111	131.172	176.388	1	0.400712	0.549751	0.739253
CC_1294	1464007	1465694	-	334.676	143.309	269.354	126.598	1	0.428202	0.80482	0.378271
CC_1295	1465903	1467851	-	491.582	709.206	821.579	598.832	1	1.4427	1.6713	1.21817
idhA	1468262	1469148	-	164.27	176.114	86.4469	184.879	1	1.0721	0.526249	1.12546
iolR	1469416	1470191	+	237.025	314.459	246.991	51.9129	1	1.32669	1.04204	0.219018
iolC	1470420	1472248	+	6168.97	8560.97	4619.23	3004.58	1	1.38775	0.748785	0.487047
iolD	1472350	1474094	+	258.414	188.416	284.707	285.231	1	0.729127	1.10175	1.10378
iolE	1474198	1474997	+	234.396	93.237	156.372	135.282	1	0.397776	0.667129	0.577154
iolB	1475094	1475803	+	179.172	155.395	276.363	125.054	1	0.867297	1.54245	0.697957
iolA	1475934	1477336	+	88.1833	181.294	154.369	147.633	1	2.05588	1.75055	1.67416
CC_1303	1477558	1477865	+	62.2367	25.0359	60.4127	29.9126	1	0.402268	0.970692	0.480627
phoP	1477962	1478530	+	54.3475	34.9639	89.1171	11.5791	1	0.643339	1.63976	0.213056
phoQ	1478627	1479885	+	70.3012	48.1293	78.6033	16.4037	1	0.684616	1.11809	0.233335
CC_1306	1480216	1481141	+	142.706	141.582	112.815	349.302	1	0.992124	0.79054	2.4477
perP	1481246	1481664	-	139.025	207.625	235.142	49.4041	1	1.49344	1.69137	0.355362
CC_1308	1482070	1482194	-	41.1989	9.06471	3.00395	0	1	0.220023	0.0729132	0
CC_1309	1482381	1483171	+	24.7194	55.4674	40.7202	11.1931	1	2.24388	1.6473	0.452808
CC_1310	1483423	1484537	+	259.641	182.589	355.801	264.582	1	0.703237	1.37036	1.01903
CC_1311	1484698	1485803	+	271.562	286.186	330.434	722.342	1	1.05385	1.21679	2.65995
1485880,,1486035	1485930	1485985	+	36.6408	35.6114	36.8818	1.54388	1	0.971905	1.00658	0.0421355
1486421,,1486729	1486471	1486679	-	14.0252	3.45322	7.17609	3.8597	1	0.246216	0.511658	0.275198
CC_1313	1486881	1487389	-	197.755	115.899	135.845	129.879	1	0.586073	0.686937	0.656766
1487512,,1488318	1487562	1488268	+	82.9238	30.4315	72.9291	117.528	1	0.366982	0.879471	1.4173
CC_1314	1488296	1490127	+	262.446	274.747	337.61	188.16	1	1.04687	1.2864	0.716948
CC_1315	1490231	1490625	+	275.77	222.085	350.293	397.742	1	0.805328	1.27024	1.44229
CC_1316	1490759	1491507	+	343.792	266.977	209.442	305.109	1	0.776566	0.609211	0.887481
1492093,,1492314	1492143	1492264	-	48.9128	39.2804	68.0894	60.0183	1	0.80307	1.39206	1.22705
CC_1317	1492585	1493057	+	7.01259	5.17983	16.021	170.406	1	0.738648	2.28461	24.3
rsaFb	1493267	1494633	+	259.992	197.265	170.724	60.9832	1	0.758737	0.656653	0.234558
popZ	1494862	1495295	+	35.7642	23.3093	6.50855	23.3512	1	0.651748	0.181985	0.65292
CC_1320	1495522	1498142	+	2.62972	1.94244	2.3364	0.192985	1	0.738648	0.888461	0.073386
CC_1321	1498537	1500188	+	530.152	361.078	748.483	711.921	1	0.681084	1.41183	1.34286
CC_1322	1500293	1500555	+	82.9238	29.3524	46.7281	26.4389	1	0.353968	0.563506	0.318834
CC_1323	1500749	1502136	-	334.676	334.747	274.027	218.652	1	1.00021	0.818783	0.653324
CC_1324	1502288	1502988	+	998.592	1229.13	764.671	624.885	1	1.23086	0.765749	0.625766
CC_1325	1503156	1503829	-	313.463	164.46	367.817	265.547	1	0.524655	1.1734	0.847141
CC_1326	1503980	1505127	+	111.325	138.992	119.157	219.038	1	1.24853	1.07035	1.96756
CC_1327	1505234	1506201	+	324.507	409.854	327.096	234.862	1	1.263	1.00798	0.723751
CC_1328	1506350	1507263	+	121.493	93.8845	219.288	167.704	1	0.772756	1.80494	1.38036
CC_1329	1507439	1508952	+	341.688	331.941	320.922	337.337	1	0.971473	0.939223	0.987266
CC_1330	1509087	1510099	+	341.688	252.085	313.745	229.073	1	0.737764	0.918221	0.670415
CC_1331	1510355	1510722	+	8.94105	7.98558	17.523	19.4915	1	0.893137	1.95984	2.18
CC_1332	1510853	1512378	-	521.736	240.215	563.908	395.812	1	0.460414	1.08083	0.758643
CC_1333	1512515	1513236	-	10.8695	1.51079	8.84495	9.07029	1	0.138993	0.81374	0.83447
fzeA	1513487	1515063	+	3.85692	5.17983	2.00263	0.771939	1	1.343	0.51923	0.200144
CC_1335	1515238	1516868	+	278.75	262.445	384.839	457.567	1	0.941505	1.38059	1.64149
CC_1336	1517010	1517782	+	3.50629	5.82731	2.00263	2.89477	1	1.66196	0.571153	0.825593
CC_1337	1517890	1518428	+	109.046	67.9853	89.9515	125.44	1	0.623457	0.824897	1.15034
CC_1338	1518606	1520038	-	239.655	172.014	216.618	104.984	1	0.717755	0.903873	0.438062
CC_1339	1520165	1520403	-	31.0307	18.9927	29.205	6.56148	1	0.612062	0.941166	0.211451
1520583,,1520759	1520633	1520709	-	0.701259	2.15826	0.83443	0.192985	1	3.0777	1.1899	0.275198
CC_1340	1520737	1520903	-	26.2972	16.4028	30.707	13.7019	1	0.623747	1.16769	0.521041
glyQ	1520984	1521783	+	47.5103	9.49636	0.667544	4.24566	1	0.19988	0.0140505	0.0893631
glyS	1521890	1523868	+	2.62972	11.6546	2.00263	55.7726	1	4.43189	0.761538	21.2086
CC_1343	1524127	1524353	-	149.017	69.2803	80.2721	117.142	1	0.464914	0.538676	0.786094
CC_1344	1524671	1525428	-	5248.4	9991.25	4865.89	2435.85	1	1.90368	0.92712	0.464114
CC_1345	1525585	1526117	+	120.967	61.0789	53.9041	51.9129	1	0.504921	0.44561	0.429149
CC_1346	1526214	1526509	-	19.1093	40.5754	45.0592	46.5093	1	2.12333	2.35797	2.43386
CC_1347	1526606	1527510	-	2.98035	2.15826	0.333772	0	1	0.724165	0.111991	0
CC_1348	1527669	1529068	-	427.242	361.293	229.802	247.406	1	0.845641	0.537873	0.579078
CC_1349	1529267	1529685	+	217.916	246.042	403.864	269.6	1	1.12907	1.8533	1.23717
CC_1350	1530025	1531070	+	999.118	514.098	723.784	621.99	1	0.514552	0.724423	0.622539
CC_1351	1531178	1531677	+	167.075	256.402	353.965	131.809	1	1.53465	2.1186	0.788919
CC_1352	1531786	1532738	+	152.348	132.733	109.978	314.758	1	0.871248	0.721883	2.06604
CC_1353	1532897	1533594	+	246.843	217.769	240.316	423.409	1	0.882216	0.973557	1.71529
CC_1354	1533766	1534562	+	145.686	40.3595	163.214	103.247	1	0.27703	1.12031	0.708692
CC_1355	1534838	1535964	+	18.934	11.0071	14.0184	0.192985	1	0.581343	0.740384	0.0101925
CC_1356	1536162	1536577	-	336.429	227.265	287.211	227.529	1	0.675522	0.853704	0.676307
CC_1357	1536773	1537959	+	244.564	360.214	330.1	327.495	1	1.47288	1.34975	1.3391
CC_1358	1538092	1538465	+	58.5551	43.1653	69.4245	110.387	1	0.737174	1.18563	1.88519
CC_1359	1538631	1538995	+	100.631	43.8128	65.2524	201.09	1	0.435382	0.648435	1.9983
nusB	1539092	1539441	+	0.701259	1.29496	6.00789	0	1	1.84662	8.5673	0
CC_1361	1539501	1540459	+	2.62972	6.69062	27.7031	0.192985	1	2.54423	10.5346	0.073386
CC_1362	1540701	1541116	+	130.083	90.6471	61.414	54.2287	1	0.696838	0.472112	0.416876
CC_1363	1541459	1543497	+	2508.23	4500.41	2458.23	1557.77	1	1.79426	0.980066	0.621065
CC_1364	1543688	1544142	-	34.7123	35.8272	103.135	45.7374	1	1.03212	2.97115	1.31761
CC_1365	1544508	1544890	-	102.208	45.971	137.514	2.5088	1	0.449777	1.34543	0.0245459
1544876,,1544995	1544926	1544945	-	7.36322	6.69062	16.5217	32.4214	1	0.908654	2.24382	4.40316
CC_1366	1545112	1545542	+	212.306	315.538	267.518	132.195	1	1.48624	1.26006	0.62266
CC_1367	1545627	1546066	+	53.1203	57.4098	30.5401	47.0883	1	1.08075	0.574923	0.886445
CC_1368	1546375	1547324	+	1.57783	0.647479	4.50592	0	1	0.41036	2.85577	0
CC_1369	1547421	1548298	+	12.272	6.47479	9.17872	2.5088	1	0.527606	0.747939	0.204433
CC_1370	1548613	1548815	+	5.61007	0.647479	2.16952	2.12283	1	0.115414	0.386718	0.378397
CC_1371	1548928	1549253	+	47.5103	55.6832	42.0552	99.7731	1	1.17202	0.885182	2.10003
CC_1372	1549559	1549629	-	16.6549	11.4388	18.8581	0.578954	1	0.686813	1.13229	0.0347618
CC_1373	1549704	1549726	+	3.85692	1.07913	1.1682	0	1	0.279791	0.302884	0
1549757,,1550008	1549807	1549958	-	76.2619	57.6257	133.342	267.863	1	0.755628	1.74847	3.51241
CC_1374	1550209	1551140	+	100.105	42.302	98.2958	32.6144	1	0.422577	0.98193	0.325803
CC_1375	1551281	1552629	-	463.357	273.236	382.836	90.3169	1	0.589689	0.826224	0.194919
CC_1376	1552916	1553289	+	0.525944	0	0.500658	0	1	0	0.951922	0
CC_1377	1553393	1553766	+	1.57783	4.1007	7.50987	0.192985	1	2.59895	4.75961	0.12231
CC_1378	1553958	1554811	+	112.552	121.726	189.749	202.441	1	1.08151	1.68588	1.79864
CC_1379	1554919	1555451	-	95.7218	84.1723	124.664	93.4046	1	0.879343	1.30235	0.975792
CC_1380	1555639	1557302	-	332.923	153.237	225.63	611.376	1	0.460277	0.677724	1.83639
CC_1381	1557591	1558087	+	70.8271	24.3884	55.2392	90.7028	1	0.344337	0.779916	1.28062
CC_1382	1558296	1559416	+	515.951	349.423	581.764	717.71	1	0.67724	1.12756	1.39104
CC_1383	1559553	1560742	+	26.1219	31.7265	86.6138	181.406	1	1.21456	3.31576	6.94459
glpX	1560917	1561770	+	272.965	335.61	417.549	208.424	1	1.2295	1.52968	0.763554
CC_1385	1561898	1562808	+	132.012	47.6976	20.8607	0.578954	1	0.361313	0.158022	0.00438562
recJ	1562976	1564696	+	20.3365	30.4315	10.8476	10.0352	1	1.4964	0.533405	0.493458
cspD	1565293	1565783	+	122.896	64.7479	54.7386	13.3159	1	0.526853	0.445407	0.108352
CC_1388	1565852	1566306	+	197.054	138.129	135.678	111.159	1	0.700971	0.688534	0.564106
CC_1389	1566574	1566779	+	51.1919	30.6474	52.0684	55.1936	1	0.598676	1.01712	1.07817
CC_1390	1567147	1567265	-	15.2524	5.17983	8.01052	17.9476	1	0.339608	0.525198	1.17671
1567279,,1567407	1567329	1567357	-	34.8876	10.5755	121.994	35.5092	1	0.30313	3.49676	1.01782
1567607,,1567735	1567657	1567685	-	6.66196	1.07913	1.1682	0	1	0.161984	0.175354	0
CC_1391	1567675	1567826	-	14.7264	10.7913	7.50987	12.737	1	0.732786	0.509958	0.864907
CC_1392	1567929	1568137	+	40.1471	48.9926	29.7057	11.3861	1	1.22033	0.739922	0.28361
CC_1393	1568238	1568395	+	62.5873	15.5395	59.7452	47.0883	1	0.248285	0.954588	0.752361
1568518,,1568736	1568568	1568686	+	6.31133	11.4388	12.1827	0	1	1.81242	1.93029	0
CC_1395	1568904	1569019	+	8.23979	1.07913	7.00921	6.94745	1	0.130966	0.850654	0.843159
CC_1396	1569344	1570419	-	238.954	158.632	307.904	423.409	1	0.663862	1.28855	1.77193
CC_1397	1570717	1571726	-	217.39	119.352	160.044	166.739	1	0.549022	0.736204	0.767003
CC_1398	1572116	1572408	-	64.3405	18.7769	83.1092	92.0537	1	0.291836	1.29171	1.43073
CC_1399	1572656	1574151	+	46.6337	23.0934	56.5743	77.9659	1	0.495209	1.21316	1.67188
CC_1400	1574373	1574677	-	78.8916	34.3164	85.1118	182.371	1	0.434982	1.07884	2.31166
ccoN	1574762	1576308	+	655.151	595.897	710.433	865.923	1	0.909556	1.08438	1.32171
ccoO	1576417	1577060	+	377.102	79.2083	328.598	525.691	1	0.210045	0.871378	1.39403
ccoQ	1577157	1577224	+	4.90881	11.6546	35.7136	37.632	1	2.37423	7.2754	7.66622
ccoP	1577324	1578090	+	157.257	57.194	194.422	91.0888	1	0.363697	1.23633	0.579234
fixG	1578196	1579586	+	349.402	351.365	392.015	283.881	1	1.00562	1.12196	0.812475
fixH	1579683	1580083	+	14.0252	34.1006	13.6846	3.8597	1	2.43138	0.97572	0.275198
fixI	1580180	1582254	+	244.564	166.834	125.498	388.864	1	0.682168	0.513151	1.59003
ccoS	1582351	1582418	+	8.23979	12.0863	36.8818	17.1756	1	1.46682	4.47606	2.08448
ompW	1582649	1583193	+	250.525	211.726	221.291	133.16	1	0.845129	0.883309	0.531523
ftrB	1583475	1584142	+	83.2745	31.2948	181.572	154.002	1	0.375803	2.1804	1.84933
hemN	1584287	1585551	+	214.41	238.488	430.566	198.774	1	1.1123	2.00814	0.927076
CC_1412	1585648	1586294	-	216.338	63.8846	210.944	185.458	1	0.2953	0.975064	0.857261
CC_1413	1586431	1588394	+	384.114	307.984	510.17	573.165	1	0.801803	1.32817	1.49217
1588441,,1588848	1588491	1588798	+	294.879	191.87	156.372	382.689	1	0.650672	0.530292	1.29778
CC_1415	1588908	1590553	+	389.199	260.071	422.388	470.111	1	0.668221	1.08528	1.20789
1590643,,1590948	1590693	1590898	-	15.0771	3.02157	5.34035	0.771939	1	0.200408	0.354204	0.0511996
1590821,,1591087	1590871	1591037	-	6.66196	1.51079	12.3496	2.12283	1	0.226778	1.85374	0.31865
CC_1417	1591161	1591480	+	1.75315	1.29496	1.00132	0.771939	1	0.738648	0.571153	0.440316
CC_1418	1591586	1592622	-	443.546	323.308	356.969	626.815	1	0.728916	0.804807	1.41319
CC_1419	1592763	1593673	-	295.581	155.611	313.912	193.178	1	0.526458	1.06202	0.653554
CC_1420	1593947	1594593	+	83.9757	72.5177	172.226	110.194	1	0.863555	2.0509	1.31222
CC_1421	1594863	1596565	+	341.162	200.719	360.14	485.743	1	0.588337	1.05563	1.42379
CC_1422	1596760	1598228	+	605.888	438.775	638.339	969.749	1	0.724186	1.05356	1.60054
CC_1423	1598399	1599939	+	186.71	169.64	213.113	121.194	1	0.908572	1.14141	0.649105
CC_1424	1600049	1601109	-	123.246	117.841	305.735	113.282	1	0.956145	2.48068	0.919152
CC_1425	1601234	1601991	-	45.7571	151.726	120.992	106.721	1	3.3159	2.64423	2.33233
CC_1426	1602165	1603063	-	688.461	1283.52	612.304	706.71	1	1.86433	0.889382	1.02651
CC_1427	1603340	1604481	-	270.686	168.129	369.152	313.793	1	0.621121	1.36376	1.15925
CC_1428	1604625	1605976	-	204.417	143.956	392.683	272.109	1	0.704228	1.92099	1.33114
CC_1429	1606138	1606901	+	1.75315	1.29496	1.1682	0.192985	1	0.738648	0.666345	0.110079
CC_1430	1607004	1607905	+	93.2674	81.5824	116.82	3.66671	1	0.874715	1.25253	0.039314
CC_1431	1608107	1609473	+	105.715	36.6905	122.661	101.317	1	0.347071	1.1603	0.9584
CC_1432	1609584	1610686	+	322.93	172.661	287.377	211.511	1	0.534671	0.889908	0.654976
CC_1433	1610818	1611872	+	418.126	345.538	289.046	201.862	1	0.826398	0.691291	0.482779
CC_1434	1611937	1612217	-	17.1808	11.0071	12.3496	51.141	1	0.640664	0.718798	2.97663
CC_1435	1612314	1613296	-	184.606	224.028	194.422	195.494	1	1.21354	1.05317	1.05898
CC_1436	1613395	1614239	+	63.1133	90.4313	50.3995	38.211	1	1.43284	0.798557	0.605435
recG	1614348	1616344	-	147.44	111.798	146.86	43.0356	1	0.758263	0.996066	0.291886
CC_1438	1616487	1616689	-	95.0206	76.8342	94.9581	53.8428	1	0.808606	0.999343	0.566643
CC_1439	1616855	1617495	-	76.2619	41.4387	78.1026	66.5798	1	0.543373	1.02414	0.873041
CC_1440	1617592	1618151	-	209.676	66.2587	150.364	153.23	1	0.316005	0.717125	0.730792
CC_1441	1618256	1618965	-	240.882	52.8775	190.417	231.775	1	0.219516	0.790497	0.96219
CC_1442	1619149	1620227	-	79.2422	121.942	116.987	136.44	1	1.53885	1.47632	1.72181
CC_1443	1620533	1620816	+	57.6785	44.2444	30.0395	228.301	1	0.767086	0.520808	3.95816
CC_1444	1620916	1621718	+	427.943	352.229	250.829	433.444	1	0.823074	0.586128	1.01285
CC_1445	1621949	1622514	+	76.4372	99.2802	51.5677	53.4568	1	1.29885	0.674642	0.699356
CC_1446	1622893	1623776	+	244.389	146.114	201.097	191.441	1	0.597878	0.822859	0.783346
CC_1447	1623873	1624273	+	12.798	28.2733	44.8923	62.5271	1	2.2092	3.50777	4.8857
CC_1448	1624364	1625544	+	128.155	67.3378	176.398	176.581	1	0.525441	1.37645	1.37787
CC_1449	1625830	1626362	-	147.44	107.05	231.137	225.985	1	0.726059	1.56767	1.53273
CC_1450	1626598	1627526	-	127.804	101.223	121.66	84.1414	1	0.792012	0.951922	0.65836
CC_1451	1627680	1628095	-	97.2996	55.0357	97.1276	50.562	1	0.565631	0.998232	0.519653
CC_1452	1628316	1629052	+	60.1329	23.0934	23.8647	65.8078	1	0.38404	0.396865	1.09437
CC_1453	1629184	1629458	+	80.4694	46.6185	134.844	107.3	1	0.579332	1.67571	1.33342
CC_1454	1629693	1630408	-	84.151	25.6833	27.8699	88.773	1	0.305205	0.33119	1.05492
CC_1455	1630607	1631376	-	281.38	235.035	333.438	313.407	1	0.835294	1.18501	1.11382
flmH	1631585	1632075	-	385.517	380.502	396.187	575.481	1	0.986992	1.02768	1.49275
flbA	1632327	1634017	-	472.999	285.323	505.998	259.179	1	0.60322	1.06977	0.547947
flbT	1634316	1634641	+	92.7415	63.453	74.4311	426.303	1	0.684192	0.802566	4.59669
flaF	1634701	1634963	+	10.6942	4.1007	11.8489	0.192985	1	0.383451	1.10797	0.0180457
fljL	1635311	1636032	+	117.11	53.9566	142.521	82.7905	1	0.460734	1.21698	0.706945
fljK	1636409	1637130	+	38.7445	59.3523	48.5638	49.5971	1	1.53189	1.25344	1.28011
CC_1462	1637343	1637611	+	199.508	149.999	156.706	467.988	1	0.751846	0.785461	2.34571
1637841,,1638677	1637891	1638627	+	71.5284	94.9636	192.92	144.739	1	1.32764	2.69711	2.02351
CC_1464	1638793	1639247	+	27.3491	34.5322	18.5243	1.54388	1	1.26265	0.677329	0.0564508
flaY	1639427	1642191	+	1045.05	609.494	1167.03	1229.51	1	0.583219	1.11672	1.1765
CC_1466	1642353	1642942	+	36.2901	8.84888	15.3535	66.7727	1	0.243837	0.423076	1.83997
CC_1467	1643060	1643358	+	72.9309	148.704	85.4456	39.7549	1	2.03898	1.1716	0.545103
CC_1468	1643715	1644118	+	22.4403	4.53235	3.17083	0.192985	1	0.201974	0.141301	0.00859993
CC_1469	1644269	1644951	+	120.792	143.093	172.894	195.494	1	1.18462	1.43134	1.61843
CC_1470	1645404	1645840	-	96.7737	137.266	124.497	186.23	1	1.41842	1.28647	1.92439
CC_1471	1646262	1648852	+	3.50629	8.41723	11.5151	2.31582	1	2.40061	3.28413	0.660474
CC_1472	1649508	1650106	-	165.672	271.51	132.174	339.074	1	1.63883	0.797801	2.04666
CC_1473	1650162	1650166	+	14.5511	5.82731	45.393	74.4921	1	0.400472	3.11955	5.11934
CC_1474	1650332	1651128	+	141.304	60.6472	120.659	61.9481	1	0.429198	0.853895	0.438404
CC_1475	1651235	1653405	-	146.388	157.122	96.46	104.212	1	1.07332	0.658935	0.711889
CC_1476	1653595	1654835	-	320.125	175.899	172.56	430.935	1	0.549469	0.53904	1.34615
1654842,,1655063	1654892	1655013	+	2.45441	2.58992	6.17478	0	1	1.05521	2.51579	0
CC_1477	1655089	1656170	+	99.2281	64.9638	84.778	150.528	1	0.654691	0.854375	1.51699
CC_1478	1656402	1658527	-	308.729	159.712	214.949	557.533	1	0.517319	0.696238	1.8059
CC_1480	1659485	1661094	+	20.1612	20.5035	11.0145	18.5265	1	1.01698	0.54632	0.918921
CC_1481	1661196	1662310	+	231.415	268.272	280.201	152.844	1	1.15927	1.21082	0.660474
CC_1482	1662424	1664231	-	383.764	497.696	462.608	615.428	1	1.29688	1.20545	1.60366
CC_1483	1664331	1665211	-	307.151	97.7694	202.099	456.988	1	0.31831	0.657978	1.48783
CC_1484	1665530	1665648	+	17.8821	4.96401	23.5309	48.2462	1	0.277597	1.31589	2.69802
tipN	1665921	1668469	+	141.83	56.1149	47.2287	53.2638	1	0.39565	0.332996	0.375548
CC_1486	1668584	1669044	+	48.3869	33.2373	61.9147	25.088	1	0.686907	1.27958	0.518488
CC_1487	1669141	1670489	-	309.781	156.258	352.296	205.529	1	0.504415	1.13724	0.663465
CC_1488	1670676	1672084	-	114.13	114.82	178.234	169.827	1	1.00604	1.56168	1.48801
CC_1489	1672345	1673318	+	105.715	155.611	132.507	208.81	1	1.47199	1.25344	1.97522
CC_1490	1673526	1674889	+	293.301	173.309	320.588	229.073	1	0.590889	1.09303	0.781015
CC_1491	1675014	1675753	+	308.729	212.373	314.079	293.723	1	0.687895	1.01733	0.951393
CC_1492	1676010	1676677	+	41.5496	90.2155	57.4087	142.616	1	2.17127	1.38169	3.43242
CC_1493	1676964	1679593	+	361.324	130.575	237.145	283.881	1	0.36138	0.656323	0.785669
CC_1494	1679848	1680131	+	17.3562	16.6186	39.8857	74.2991	1	0.957507	2.29807	4.28085
CC_1495	1680225	1680799	+	177.243	182.805	147.861	197.23	1	1.03138	0.834226	1.11277
CC_1496	1680906	1681912	+	149.543	113.093	109.143	339.846	1	0.756256	0.729844	2.27256
1681959,,1682195	1682009	1682145	-	32.9592	67.3378	79.9383	51.7199	1	2.04307	2.42538	1.56921
1682117,,1682677	1682167	1682627	-	35.2383	28.9207	93.9568	22.0003	1	0.82072	2.66633	0.624329
CC_1498	1683046	1683257	-	41.3743	8.63306	9.67938	0.192985	1	0.208658	0.233947	0.00466437
CC_1499	1683617	1684602	+	420.931	283.812	258.84	395.233	1	0.674248	0.614923	0.93895
CC_1500	1684776	1686121	+	284.01	155.395	306.903	296.425	1	0.547147	1.08061	1.04371
CC_1501	1686333	1686955	+	70.3012	78.7766	66.2537	84.5273	1	1.12056	0.942426	1.20236
CC_1502	1687132	1688594	+	349.051	281.006	274.194	477.251	1	0.805056	0.785539	1.36728
CC_1503	1688734	1689047	-	67.8468	19.4244	25.5335	133.545	1	0.286298	0.376341	1.96834
CC_1504	1689144	1689718	-	35.7642	95.8269	79.2708	146.475	1	2.67941	2.21649	4.09559
CC_1505	1689815	1690068	-	81.346	7.55392	34.2116	9.45625	1	0.0928616	0.420569	0.116247
CC_1506	1690223	1690857	+	233.87	164.46	91.4535	195.88	1	0.703211	0.391044	0.837558
CC_1507	1691018	1692144	-	230.714	233.956	355.133	218.845	1	1.01405	1.53928	0.948554
CC_1508	1692359	1693554	-	351.857	215.826	251.831	269.214	1	0.613393	0.71572	0.765124
CC_1509	1693682	1694400	-	87.8327	133.165	93.9568	192.406	1	1.51612	1.06972	2.1906
CC_1510	1694729	1694991	+	95.1959	30.8632	23.0303	1.35089	1	0.324207	0.241925	0.0141907
CC_1511	1695353	1696761	+	336.604	241.294	411.541	256.091	1	0.716848	1.22262	0.760807
CC_1512	1697128	1697483	+	74.1581	49.8559	101.467	305.881	1	0.672292	1.36825	4.12471
CC_1513	1697692	1697924	+	1.40252	1.94244	0.166886	6.17551	1	1.38497	0.11899	4.40316
CC_1514	1698139	1698401	+	95.8971	49.6401	166.886	135.668	1	0.517639	1.74026	1.41473
CC_1515	1698571	1699511	-	25.9466	13.5971	39.2182	14.0879	1	0.524041	1.5115	0.542958
CC_1516	1699736	1702020	-	362.025	259.639	418.55	481.497	1	0.717186	1.15614	1.33001
CC_1517	1702406	1704387	-	608.517	396.905	571.751	674.675	1	0.652249	0.939581	1.10872
CC_1518	1704635	1705260	+	66.269	29.5682	38.5506	48.4392	1	0.446185	0.58173	0.730948
CC_1519	1705357	1706705	+	207.573	184.316	231.137	212.862	1	0.887958	1.11352	1.02548
CC_1520	1706802	1708057	+	351.857	132.086	384.505	384.04	1	0.375397	1.09279	1.09147
CC_1521	1708162	1709198	-	150.946	83.9565	106.473	293.144	1	0.556202	0.705373	1.94205
ligA	1709431	1711682	+	4.38287	4.1007	2.16952	1.15791	1	0.935621	0.494999	0.26419
CC_1523	1711758	1712287	+	183.73	131.438	197.259	208.617	1	0.715389	1.07364	1.13545
CC_1524	1712503	1712831	+	42.6015	37.9855	92.121	57.3165	1	0.891647	2.16239	1.34541
CC_1525	1713070	1714781	-	85.9042	83.7407	192.419	175.423	1	0.974815	2.23993	2.04208
CC_1526	1715085	1715851	-	79.2422	60.2156	192.586	150.914	1	0.759892	2.43035	1.90447
CC_1527	1715991	1716385	-	57.1526	35.8272	45.7267	100.159	1	0.626869	0.800082	1.75249
uvrD	1716528	1718863	-	124.824	106.834	78.6033	342.934	1	0.855877	0.629712	2.74734
1718983,,1719228	1719033	1719178	-	34.8876	79.6399	52.5691	4.63163	1	2.28276	1.50681	0.132759
CC_1529	1719398	1720809	+	253.505	207.409	455.765	206.301	1	0.818166	1.79786	0.813793
CC_1530	1720977	1721053	-	2.80503	7.55392	3.17083	16.0177	1	2.69299	1.13041	5.71035
CC_1531	1721159	1721967	-	260.167	179.568	403.864	508.901	1	0.690201	1.55233	1.95605
CC_1532	1722204	1722340	+	228.435	62.158	119.323	363.969	1	0.272104	0.522352	1.59332
CC_1533	1722567	1723105	+	200.735	125.395	174.73	243.161	1	0.624679	0.870447	1.21135
CC_1534	1723344	1724446	-	196.352	165.971	318.085	410.865	1	0.845268	1.61997	2.09249
CC_1535	1724810	1725303	+	193.898	156.258	174.73	342.162	1	0.805879	0.901141	1.76465
CC_1536	1725400	1725839	-	94.8452	94.532	71.594	141.844	1	0.996697	0.754851	1.49553
CC_1537	1725950	1726512	-	32.9592	26.3308	120.158	60.5972	1	0.798892	3.64566	1.83855
CC_1538	1726831	1727450	+	30.8554	31.2948	34.7123	12.544	1	1.01424	1.125	0.406542
CC_1539	1727513	1728087	-	45.7571	52.23	42.5559	12.158	1	1.14146	0.930039	0.265708
CC_1540	1728237	1730092	+	602.381	669.494	814.737	538.62	1	1.11141	1.35253	0.894152
CC_1541	1730434	1731908	+	325.559	187.769	118.99	226.95	1	0.576758	0.365493	0.697108
CC_1542	1732135	1732913	+	77.4891	219.064	85.6125	179.669	1	2.82703	1.10483	2.31863
mreB	1733367	1734310	+	2.10378	0.863306	1.00132	5.98253	1	0.41036	0.475961	2.84371
mreC	1734460	1735400	+	0.876573	0.431653	0	0.578954	1	0.492432	0	0.660474
CC_1545	1735497	1735912	+	0.701259	1.07913	0.333772	0	1	1.53885	0.475961	0
CC_1546	1736017	1737935	+	1147.26	1748.63	941.737	594.779	1	1.52418	0.820858	0.518435
rodA	1738032	1739089	+	11.5708	1.07913	2.00263	0.771939	1	0.0932636	0.173077	0.0667146
CC_1548	1739189	1739640	+	96.0724	51.1509	110.812	51.9129	1	0.53242	1.15342	0.540352
CC_1549	1739788	1740365	-	15.2524	17.4819	5.17346	2.12283	1	1.14618	0.339191	0.13918
CC_1550	1740468	1740964	-	113.604	120.431	219.789	132.581	1	1.0601	1.93469	1.16704
CC_1551	1741114	1741508	+	8.76573	3.2374	8.84495	9.26327	1	0.369324	1.00904	1.05676
CC_1552	1741737	1741996	+	8.23979	2.80574	1.00132	10.2282	1	0.340512	0.121522	1.24132
spoT	1742198	1744326	+	1615.88	2095.46	1370.63	1102.91	1	1.29679	0.84823	0.682545
CC_1554	1744564	1744883	-	142.356	28.9207	84.778	165.774	1	0.203159	0.595537	1.16451
CC_1555	1745064	1745548	+	49.7894	10.1438	6.17478	4.43865	1	0.203735	0.124018	0.0891485
CC_1556	1745820	1747339	-	356.239	380.502	487.14	500.603	1	1.06811	1.36745	1.40524
CC_1557	1747618	1748282	+	0	0.431653	0	0	#DIV/0!	#DIV/0!	#DIV/0!	#DIV/0!
acpS	1748379	1748680	+	0.876573	1.07913	0	0	1	1.23108	0	0
1748742,,1749035	1748792	1748985	+	57.3279	75.9709	44.2248	40.9128	1	1.3252	0.771435	0.713663
CC_1559	1749209	1749954	+	315.216	276.042	341.282	332.513	1	0.875724	1.08269	1.05487
CC_1560	1750076	1750671	+	15.7783	20.0719	14.1853	7.14044	1	1.27212	0.899037	0.452547
1750823,,1750978	1750873	1750928	-	16.4796	13.1654	37.5493	16.9827	1	0.798892	2.27854	1.03053
1751025,,1751486	1751075	1751436	-	218.091	119.352	140.685	137.984	1	0.547257	0.645073	0.632689
era	1751686	1752536	+	2.80503	4.31653	8.01052	8.29835	1	1.53885	2.85577	2.95838
CC_1563	1752629	1753380	+	140.076	94.1003	172.393	160.563	1	0.671778	1.23071	1.14626
CC_1564	1753483	1754114	+	59.7823	62.8055	111.146	80.8606	1	1.05057	1.85918	1.35258
CC_1565	1754268	1755754	+	403.574	211.726	542.88	583.2	1	0.524626	1.34518	1.44509
CC_1566	1755916	1758095	+	530.502	692.587	383.504	266.126	1	1.30553	0.722907	0.501649
CC_1567	1758192	1759480	+	45.9324	50.7192	141.853	28.5617	1	1.10421	3.0883	0.621821
CC_1568	1759692	1760902	+	140.953	142.877	171.559	175.23	1	1.01365	1.21713	1.24318
CC_1569	1761040	1761902	+	39.7964	45.3235	59.7452	81.6326	1	1.13888	1.50127	2.05125
CC_1570	1762011	1762846	+	60.3083	134.46	67.5888	176.774	1	2.22954	1.12072	2.93118
CC_1571	1762959	1763626	+	300.489	334.531	282.037	238.529	1	1.11329	0.938593	0.793802
CC_1572	1763766	1764505	-	279.452	203.956	312.077	403.724	1	0.729844	1.11675	1.4447
CC_1573	1764706	1765502	-	159.536	85.0356	80.2721	133.931	1	0.533017	0.503159	0.839504
CC_1574	1765717	1766477	+	73.8075	100.143	167.053	157.862	1	1.35682	2.26336	2.13883
CC_1575	1766574	1767133	-	88.1833	23.7409	52.0684	218.652	1	0.269222	0.590457	2.47951
CC_1576	1767230	1768284	-	152.348	103.597	169.222	94.3696	1	0.679998	1.11076	0.619432
CC_1577	1768455	1769617	+	136.745	297.84	117.154	104.019	1	2.17806	0.85673	0.760675
CC_1578	1769714	1770555	+	136.044	58.9206	210.276	96.2994	1	0.433099	1.54565	0.707854
CC_1579	1770705	1771129	-	7.1879	10.7913	17.8568	0.964924	1	1.50132	2.48428	0.134243
CC_1580	1771354	1774013	+	19.6352	27.6258	14.8528	14.8598	1	1.40695	0.756438	0.756794
CC_1581	1774140	1774531	+	1.75315	0.647479	2.16952	53.6498	1	0.369324	1.2375	30.602
CC_1582	1774789	1775522	+	143.758	75.7551	112.648	210.932	1	0.526962	0.783594	1.46727
CC_1583	1775619	1776367	+	266.303	107.697	183.074	492.304	1	0.404417	0.687464	1.84866
CC_1584	1776559	1776926	+	149.193	47.266	60.0789	79.7027	1	0.316811	0.402693	0.534226
CC_1585	1777193	1778070	-	81.5213	46.6185	133.342	80.0887	1	0.571857	1.63567	0.982426
CC_1586	1778212	1778756	-	230.013	200.719	151.032	268.635	1	0.872641	0.656623	1.16791
CC_1587	1778943	1779943	+	76.0866	111.582	89.1171	208.231	1	1.46652	1.17126	2.73676
CC_1588	1780043	1781058	+	95.0206	109.424	172.393	72.5623	1	1.15158	1.81427	0.763648
CC_1589	1781269	1781861	-	58.5551	40.5754	72.9291	198.581	1	0.692943	1.24548	3.39136
1782217,,1782321	1782267	1782271	-	8.23979	8.41723	16.5217	0.38597	1	1.02153	2.00511	0.0468422
CC_1590	1782285	1782499	-	67.1455	38.4171	54.071	34.3513	1	0.572147	0.805281	0.511595
CC_1591	1782701	1784313	+	196.177	111.366	349.96	240.652	1	0.567683	1.7839	1.22671
CC_1592	1784425	1786385	+	165.672	164.46	118.155	73.5272	1	0.99268	0.713186	0.443811
CC_1593	1786513	1787006	+	48.5622	39.7121	41.8884	29.5267	1	0.817757	0.862572	0.608018
CC_1594	1787106	1789684	+	191.093	215.611	374.826	198.195	1	1.1283	1.96148	1.03717
CC_1595	1789792	1790390	+	169.88	91.9421	107.308	296.232	1	0.541218	0.631667	1.74377
CC_1596	1790754	1791526	+	94.8452	44.4602	70.4258	260.915	1	0.468766	0.742534	2.75096
CC_1597	1791626	1792383	+	70.6518	221.654	160.878	503.883	1	3.13727	2.27705	7.13192
CC_1598	1792500	1793419	+	124.999	17.4819	136.513	55.5796	1	0.139856	1.09211	0.444639
CC_1599	1793624	1793880	+	13.4992	6.90645	32.5427	178.511	1	0.511618	2.41071	13.2238
CC_1600	1794079	1794956	-	258.063	76.1867	171.892	232.933	1	0.295225	0.666087	0.902619
CC_1601	1795068	1795915	-	162.166	165.755	262.345	271.916	1	1.02213	1.61775	1.67677
CC_1602	1796012	1797393	-	501.575	517.12	495.818	895.835	1	1.03099	0.988522	1.78604
CC_1603	1797785	1799469	+	107.293	91.7262	149.697	40.1408	1	0.854917	1.39522	0.374125
CC_1604, COG2911	1799641	1803662	+	67.6715	60.4314	108.142	13.5089	1	0.893012	1.59805	0.199625
CC_1605	1803864	1805008	+	79.2422	41.6545	38.2169	103.826	1	0.52566	0.482279	1.31023
CC_1606	1805109	1806013	+	172.51	145.035	120.825	49.7901	1	0.840738	0.700398	0.288622
CC_1607	1806110	1807467	+	188.989	53.525	142.687	402.952	1	0.283217	0.755003	2.13214
CC_1608	1807564	1808804	+	90.2871	45.3235	101.8	157.283	1	0.501994	1.12752	1.74203
CC_1609	1808901	1809307	+	0	15.5395	17.0224	0	#DIV/0!	#DIV/0!	#DIV/0!	#DIV/0!
CC_1610	1809404	1810113	-	139.2	39.2804	152.2	79.5097	1	0.282187	1.09339	0.571191
CC_1611	1810311	1811461	+	191.619	244.315	186.745	210.932	1	1.27501	0.974566	1.10079
CC_1612	1811516	1812300	-	130.259	128.201	314.914	365.32	1	0.984201	2.4176	2.80457
CC_1613	1812565	1812794	-	98.0009	84.3881	50.5664	111.159	1	0.861095	0.515979	1.13427
CC_1614	1812939	1814062	+	217.215	232.013	201.598	153.037	1	1.06813	0.928105	0.704542
CC_1615	1814159	1814769	+	1.40252	0.215826	0.166886	0.38597	1	0.153885	0.11899	0.275198
CC_1616	1814866	1815809	+	194.424	132.086	203.434	334.057	1	0.67937	1.04634	1.71819
CC_1617	1816002	1817365	+	5.9607	3.2374	10.6807	18.1406	1	0.543124	1.79185	3.04336
CC_1618	1817469	1817764	+	97.475	48.7768	188.748	290.249	1	0.500403	1.93637	2.97768
CC_1619	1817864	1819041	+	98.8775	252.301	169.055	268.635	1	2.55165	1.70975	2.71685
CC_1620	1819174	1820636	+	51.8931	25.6833	15.3535	27.4038	1	0.494927	0.295868	0.528082
CC_1621	1820864	1821660	-	127.98	43.5969	111.647	48.0532	1	0.340655	0.872378	0.375475
CC_1622	1821774	1823608	-	407.256	318.128	353.965	449.848	1	0.78115	0.869146	1.10458
CC_1623	1823727	1826539	-	754.73	623.523	850.117	1031.89	1	0.826153	1.12639	1.36723
CC_1624	1826844	1828420	-	334.851	129.28	201.598	244.512	1	0.386082	0.602053	0.73021
CC_1625	1828570	1829594	+	36.1148	10.5755	15.8542	24.7021	1	0.29283	0.438993	0.683987
CC_1626	1829691	1830466	+	188.463	122.805	274.694	230.617	1	0.651614	1.45755	1.22367
CC_1627	1830563	1831470	-	83.4498	54.1724	214.448	183.722	1	0.649162	2.56979	2.20158
CC_1628	1831748	1832889	+	157.783	71.8702	236.811	245.091	1	0.4555	1.50086	1.55334
CC_1629	1832990	1833876	+	105.364	114.82	172.894	86.4572	1	1.08974	1.64092	0.820556
CC_1630	1833976	1835006	+	145.511	140.503	139.85	154.967	1	0.965582	0.961097	1.06498
CC_1631	1835106	1836061	+	244.564	230.718	152.367	332.127	1	0.943387	0.623014	1.35804
CC_1632	1836189	1836451	+	45.7571	37.338	76.6006	44.5795	1	0.816003	1.67407	0.974263
CC_1633	1836771	1837516	-	138.674	99.0643	144.023	112.51	1	0.714369	1.03857	0.811329
CC_1634	1837768	1839407	+	509.289	566.113	498.154	731.798	1	1.11157	0.978137	1.4369
CC_1635	1839507	1839955	+	99.2281	128.848	145.358	94.1766	1	1.29851	1.46488	0.949092
CC_1636	1840160	1840611	+	118.863	126.258	56.7412	81.0536	1	1.06222	0.477365	0.681906
CC_1637	1840795	1841024	-	1.92846	4.96401	8.51118	58.6674	1	2.57408	4.41346	30.4219
CC_1638	1841127	1842556	-	266.128	219.927	286.71	273.845	1	0.826397	1.07734	1.029
CC_1639	1842830	1844205	-	137.096	109.64	145.858	189.125	1	0.79973	1.06391	1.37951
CC_1640	1844295	1844578	-	31.9073	121.294	66.7544	130.651	1	3.80147	2.09214	4.0947
CC_1641	1844802	1845280	+	78.541	48.1293	79.2708	11.9651	1	0.612792	1.00929	0.152342
CC_1642	1845428	1845723	+	105.189	134.46	112.982	110.001	1	1.27827	1.07409	1.04575
CC_1643	1845977	1846515	+	81.5213	42.7336	46.2274	104.598	1	0.524202	0.567059	1.28307
CC_1644	1846652	1846737	+	6649.16	12333.8	5511.57	2938.19	1	1.85495	0.828913	0.441889
CC_1645	1846850	1847160	+	101.683	48.7768	113.816	62.5271	1	0.479697	1.11933	0.614924
CC_1646	1847260	1847675	+	14.2005	14.0287	57.4087	22.7722	1	0.987904	4.04273	1.60362
CC_1647	1847772	1847980	+	0.175315	0.647479	0	0.192985	1	3.69324	0	1.10079
CC_1648	1848085	1848515	-	105.364	126.043	69.0908	18.7195	1	1.19626	0.655733	0.177665
CC_1649	1848599	1849083	+	38.7445	40.3595	72.5954	61.5621	1	1.04168	1.87369	1.58892
CC_1650	1849152	1849456	+	12.0967	1.72661	0.166886	0	1	0.142734	0.013796	0
CC_1651	1849649	1850376	+	3.15566	1.29496	9.17872	8.49133	1	0.41036	2.90865	2.69082
CC_1652, COG4649	1850629	1851281	+	32.0826	13.8129	20.3601	0	1	0.430542	0.634615	0
CC_1653	1851378	1852708	+	3.15566	5.39566	2.50329	0.771939	1	1.70983	0.793268	0.24462
CC_1654	1852934	1854600	+	37.6927	58.7048	27.3693	19.8774	1	1.55746	0.726117	0.527356
CC_1655	1854779	1856223	-	139.025	99.496	264.014	99.9661	1	0.715672	1.89904	0.719054
CC_1656	1856470	1857125	-	16.1289	23.3093	19.6925	54.4217	1	1.44518	1.22094	3.37416
CC_1657	1857274	1858187	-	12455.8	27599	12998.6	5775.07	1	2.21576	1.04358	0.463647
CC_1658	1858307	1859709	-	118.162	116.978	136.346	141.844	1	0.989978	1.15389	1.20042
CC_1659	1859806	1860323	-	116.935	59.5681	64.418	173.3	1	0.509412	0.550887	1.48202
CC_1660	1860420	1861702	-	119.039	22.6618	96.6269	48.2462	1	0.190373	0.811727	0.405299
CC_1661	1861876	1862870	-	143.057	126.906	157.207	264.582	1	0.887102	1.09891	1.84949
CC_1662	1863010	1863596	-	178.12	99.2802	202.933	152.651	1	0.557379	1.13931	0.857013
CC_1663	1863754	1864139	-	17.8821	4.74818	24.3653	0	1	0.265527	1.36256	0
CC_1664	1864337	1864836	+	73.8075	18.3452	53.4035	45.1584	1	0.248555	0.723551	0.611841
CC_1665	1864951	1866374	-	16.3043	6.25897	7.17609	41.2987	1	0.383885	0.440136	2.533
CC_1666	1866684	1869013	-	1148.66	1397.26	796.046	791.431	1	1.21642	0.69302	0.689002
CC_1667	1869318	1869802	-	6.83727	17.2661	65.2524	155.739	1	2.52529	9.54363	22.7779
CC_1668	1869916	1870094	-	4.03224	12.3021	0.166886	0.578954	1	3.05094	0.0413879	0.143581
CC_1669	1870209	1870489	-	0.701259	0	0	0	1	0	0	0
CC_1670	1870858	1871417	+	93.618	15.7553	75.9331	112.124	1	0.168294	0.811095	1.19768
CC_1671	1871492	1872201	-	127.98	76.6184	257.505	228.301	1	0.598676	2.01208	1.78388
CC_1672	1872375	1873387	-	200.034	42.7336	50.2327	116.949	1	0.213632	0.251121	0.584644
CC_1673	1873559	1873992	-	126.402	113.309	123.662	186.423	1	0.896418	0.978328	1.47485
CC_1674	1874260	1875104	+	8.41511	10.5755	3.67149	1.15791	1	1.25673	0.436298	0.137599
CC_1675	1875223	1875863	+	8.06447	31.079	12.6833	29.9126	1	3.85382	1.57274	3.70919
CC_1676	1875985	1876814	+	485.622	103.597	205.77	396.198	1	0.213328	0.423726	0.815857
CC_1677	1877079	1877215	+	0.350629	0.215826	0.166886	0	1	0.61554	0.475961	0
CC_1678	1877482	1878662	+	0	2.37409	0	0.38597	#DIV/0!	#DIV/0!	#DIV/0!	#DIV/0!
CC_1679	1878759	1879759	+	94.8452	172.229	194.589	239.88	1	1.8159	2.05165	2.52917
CC_1680	1879863	1880644	+	63.1133	65.3954	65.0855	43.8075	1	1.03616	1.03125	0.69411
CC_1681	1880737	1881278	+	41.5496	49.4243	16.1879	52.1059	1	1.18952	0.389605	1.25407
CC_1682	1881417	1881622	-	44.1793	47.266	123.496	4.24566	1	1.06987	2.79533	0.0961008
CC_1683	1881835	1883402	-	113.253	94.3161	200.263	255.512	1	0.83279	1.76828	2.25611
CC_1684	1883585	1883604	-	0.175315	0	0.333772	0.192985	1	0	1.90384	1.10079
CC_1685	1883768	1884513	-	49.2634	55.0357	34.5454	51.334	1	1.11717	0.701238	1.04203
CC_1686	1884643	1885544	-	5.43476	5.82731	3.00395	0.578954	1	1.07223	0.552729	0.106528
CC_1688	1885641	1886890	-	15.7783	3.45322	1.50197	0.964924	1	0.218859	0.0951922	0.061155
CC_1689	1887157	1889486	-	8155.29	12064.9	5956.49	3344.04	1	1.4794	0.730384	0.410046
CC_1690	1889579	1890585	-	7.71385	3.02157	23.1971	0	1	0.391707	3.00721	0
CC_1691	1890682	1891721	-	316.092	546.472	244.321	130.072	1	1.72884	0.772942	0.411499
CC_1692	1892049	1893430	+	97.8256	31.7265	191.752	119.072	1	0.324317	1.96014	1.21718
CC_1693	1893651	1894012	+	0	0.431653	0	0	#DIV/0!	#DIV/0!	#DIV/0!	#DIV/0!
CC_1694	1894109	1894350	+	13.6745	1.51079	4.00526	2.89477	1	0.110482	0.292899	0.211691
CC_1695	1894493	1895220	-	224.227	102.949	162.881	351.425	1	0.459128	0.726408	1.56727
CC_1696	1895356	1895771	+	146.388	53.525	99.1302	125.247	1	0.365638	0.677176	0.855585
CC_1697	1895884	1896206	-	27.3491	9.06471	4.67281	10.2282	1	0.331445	0.170858	0.373987
CC_1698	1896360	1898125	-	192.496	106.834	199.262	407.97	1	0.554995	1.03515	2.11937
CC_1699	1898322	1898641	+	0.701259	0.863306	1.83574	0	1	1.23108	2.61779	0
1898688,,1898930	1898738	1898880	-	26.2972	18.7769	10.6807	8.49133	1	0.714027	0.406153	0.322899
1899035,,1899412	1899085	1899362	+	71.7037	21.151	99.9647	79.3167	1	0.294978	1.39414	1.10617
CC_1701	1899459	1899976	-	30.6801	18.7769	87.4482	20.6494	1	0.612023	2.85033	0.673055
CC_1702	1900155	1900636	-	20.5118	22.2301	15.8542	16.2107	1	1.08377	0.772928	0.790311
CC_1703	1900897	1901822	-	49.0881	48.5609	110.645	77.5799	1	0.989261	2.25402	1.58042
CC_1704	1902048	1903117	+	3.68161	4.31653	2.67017	0.38597	1	1.17246	0.725274	0.104837
CC_1705	1903419	1905049	+	151.472	126.043	234.308	259.372	1	0.832119	1.54687	1.71234
CC_1706	1905254	1906446	+	226.507	184.747	191.919	153.809	1	0.815638	0.847299	0.679048
CC_1707	1906579	1906832	-	35.0629	4.53235	44.7254	48.8252	1	0.129263	1.27558	1.3925
ppx1	1907004	1908403	-	115.182	93.0212	179.736	190.09	1	0.807604	1.56046	1.65035
CC_1709	1908594	1908889	-	34.3617	26.115	49.8989	3.66671	1	0.760004	1.45217	0.106709
ppk1	1908986	1911024	-	196.703	176.978	257.338	281.179	1	0.89972	1.30826	1.42946
hdaA	1911408	1912000	-	0	0.215826	0.667544	0	#DIV/0!	#DIV/0!	#DIV/0!	#DIV/0!
CC_1712	1912277	1912569	-	72.5803	137.481	207.94	22.7722	1	1.8942	2.86496	0.313752
CC_1713	1912536	1913047	-	161.465	114.388	255.836	274.231	1	0.708439	1.58447	1.6984
CC_1715	1914046	1914686	+	14.3758	3.02157	21.0276	23.1582	1	0.210184	1.46271	1.61091
1914921,,1915856	1914971	1915806	-	118.337	87.6255	90.7859	72.3693	1	0.740472	0.767179	0.61155
CC_1717	1916161	1916420	-	74.1581	36.2588	56.9081	19.1055	1	0.48894	0.767389	0.257632
CC_1718	1916699	1917114	-	124.123	36.2588	92.6217	157.283	1	0.292121	0.74621	1.26715
CC_1719	1917354	1917721	+	2.27909	1.94244	0.333772	1.35089	1	0.852286	0.14645	0.592733
CC_1720	1917937	1919489	+	8.23979	5.61149	5.34035	3.8597	1	0.681023	0.648117	0.468422
CC_1721	1919704	1919786	+	4.55818	1.94244	6.17478	22.3862	1	0.426143	1.35466	4.91122
CC_1722	1920010	1920908	+	14.0252	14.4604	42.5559	21.0353	1	1.03103	3.03425	1.49983
CC_1723	1921021	1921733	-	99.5787	31.2948	51.0671	129.107	1	0.314272	0.512831	1.29653
CC_1724	1921905	1923085	+	16.4796	4.31653	3.33772	4.82462	1	0.261932	0.202537	0.292763
1923329,,1923436	1923379	1923386	+	7.01259	1.94244	8.84495	14.4739	1	0.276993	1.2613	2.06398
CC_1725	1923539	1923741	+	0.525944	0.431653	0.333772	0.192985	1	0.82072	0.634615	0.36693
1923866,,1924015	1923916	1923965	-	9.29168	0.863306	7.00921	0.192985	1	0.0929117	0.754353	0.0207696
CC_1726	1924007	1924938	-	7.1879	9.49636	21.5283	36.2811	1	1.32116	2.99507	5.04753
CC_1727	1925035	1926287	+	19.9859	11.0071	30.3732	21.0353	1	0.550746	1.51974	1.05251
CC_1728	1926393	1926745	+	52.7697	17.0503	39.0513	45.3514	1	0.323107	0.740032	0.859421
1926792,,1926908	1926842	1926858	+	0	0	0	0	#DIV/0!	#DIV/0!	#DIV/0!	#DIV/0!
CC_1729	1926971	1928157	+	2.27909	2.58992	0.667544	6.56148	1	1.13638	0.292899	2.87899
CC_1730	1928276	1928658	+	116.058	102.086	170.391	255.705	1	0.879609	1.46815	2.20324
CC_1731	1928841	1930141	+	26.2972	11.223	8.84495	120.037	1	0.426774	0.336346	4.56461
CC_1732	1930261	1931618	+	125.701	130.575	137.514	73.7202	1	1.03878	1.09398	0.586474
CC_1733	1931751	1933204	-	251.051	77.4817	212.446	201.283	1	0.30863	0.846227	0.801763
CC_1734	1933393	1934369	-	96.949	118.489	63.2498	158.826	1	1.22218	0.652402	1.63825
CC_1735	1934552	1935429	+	0.876573	1.29496	7.67675	0	1	1.4773	8.75768	0
CC_1736	1935533	1935879	+	6.13601	3.45322	9.67938	1.73686	1	0.562779	1.57747	0.28306
CC_1737	1935976	1936367	-	16.3043	4.31653	65.0855	27.2109	1	0.264748	3.99193	1.66894
CC_1738	1936506	1937554	-	0.350629	1.51079	0.166886	0.771939	1	4.30878	0.475961	2.20158
CC_1739	1937754	1938661	+	103.611	236.762	116.153	102.861	1	2.2851	1.12105	0.99276
CC_1740	1938758	1939779	+	14.7264	13.3812	29.5388	42.2637	1	0.908654	2.00584	2.86992
CC_1741	1939876	1941197	+	6.83727	2.15826	1.66886	2.12283	1	0.315662	0.244083	0.310479
CC_1742	1941362	1943505	+	102.91	155.827	186.078	353.548	1	1.51421	1.80817	3.43552
CC_1743	1943602	1944890	+	177.068	139.856	272.692	310.512	1	0.789841	1.54004	1.75364
CC_1744	1944991	1945754	+	97.1243	116.978	151.532	136.054	1	1.20441	1.56019	1.40083
CC_1745	1946012	1946160	+	5.9607	4.53235	2.3364	8.49133	1	0.760373	0.391968	1.42455
CC_1746	1946273	1947513	+	81.1707	41.8703	87.1144	38.404	1	0.515831	1.07323	0.473126
CC_1747	1947610	1948277	-	44.8806	167.265	102.134	57.7024	1	3.7269	2.27569	1.28569
CC_1748	1948400	1949712	-	361.674	260.718	419.217	697.447	1	0.720865	1.1591	1.92838
1950040,,1950258	1950090	1950208	-	4.38287	15.9712	0.83443	2.5088	1	3.644	0.190384	0.572411
1950334,,1950669	1950384	1950619	-	1.40252	0	0.166886	0	1	0	0.11899	0
1950933,,1951280	1950983	1951230	-	69.7752	13.3812	47.3956	35.1232	1	0.191776	0.679261	0.503377
CC_1750	1951348	1953200	+	628.328	532.012	712.102	358.18	1	0.846711	1.13333	0.570052
CC_1751	1953366	1954720	+	44.1793	105.971	72.9291	169.827	1	2.39865	1.65075	3.84403
CC_1752	1954817	1955292	-	45.5818	56.5465	27.5362	65.8078	1	1.24055	0.604104	1.44373
CC_1753	1955543	1956489	+	112.552	35.1797	125.665	157.862	1	0.312564	1.11651	1.40257
CC_1754	1956724	1959485	+	917.772	387.408	959.427	1001.98	1	0.422118	1.04539	1.09175
CC_1755	1959700	1961123	+	228.084	62.5897	164.216	332.513	1	0.274414	0.719978	1.45785
CC_1756	1961409	1963435	+	382.537	156.474	388.677	491.918	1	0.409044	1.01605	1.28594
CC_1757	1963535	1964844	+	126.928	184.963	292.217	129.3	1	1.45723	2.30223	1.01869
CC_1758	1965059	1967481	-	143.407	60.4314	172.727	159.212	1	0.421397	1.20445	1.11021
CC_1759	1967578	1968164	-	20.6871	8.84888	3.17083	48.0532	1	0.427748	0.153276	2.32285
CC_1760	1968322	1968854	+	35.0629	18.3452	44.7254	48.4392	1	0.523209	1.27558	1.38149
CC_1761	1969103	1970031	-	274.017	181.726	264.681	532.059	1	0.663192	0.96593	1.9417
1970511,,1970780	1970561	1970730	-	27.5244	10.5755	20.527	25.474	1	0.384222	0.745773	0.925506
CC_1762	1970753	1970790	-	11.0448	81.5824	15.8542	9.26327	1	7.38648	1.43544	0.838698
CC_1763	1970932	1972274	-	301.366	152.805	285.375	357.601	1	0.507042	0.946938	1.1866
CC_1764	1972540	1974059	+	300.84	172.661	280.869	366.864	1	0.57393	0.933616	1.21947
1974143,,1974370	1974193	1974320	+	10.3436	1.51079	2.3364	19.2985	1	0.14606	0.22588	1.86575
CC_1765	1974501	1975978	+	291.022	263.092	181.906	204.95	1	0.904028	0.625057	0.704241
CC_1766	1976227	1976753	-	207.923	197.265	130.505	243.161	1	0.948741	0.627659	1.16947
CC_1767	1977136	1977569	-	99.7541	32.1581	59.5783	5.21059	1	0.322374	0.597252	0.0522344
CC_1768	1977662	1978908	-	319.599	278.848	360.974	126.405	1	0.872493	1.12946	0.395512
CC_1769	1979005	1979642	-	130.259	88.4888	137.347	134.124	1	0.679331	1.05442	1.02968
qoxD	1979739	1980028	-	91.8649	23.9567	58.5769	194.529	1	0.260782	0.637642	2.11755
qoxC	1980125	1980651	-	91.6896	52.8775	72.4285	106.142	1	0.576701	0.789931	1.15762
qoxB	1980754	1982651	-	419.353	477.624	741.975	947.169	1	1.13895	1.76933	2.25865
qoxA	1982770	1983731	-	111.675	112.23	171.392	234.669	1	1.00496	1.53473	2.10135
CC_1774	1984042	1985282	+	144.635	195.755	88.7833	188.739	1	1.35344	0.613845	1.30494
CC_1775	1985475	1985779	+	35.4136	12.3021	36.7149	226.564	1	0.347384	1.03675	6.39766
CC_1776	1986024	1986589	+	49.9647	32.8056	70.9265	81.4396	1	0.656576	1.41953	1.62994
CC_1777	1986819	1987435	+	134.466	156.042	243.487	163.651	1	1.16046	1.81076	1.21704
CC_1778	1987478	1989576	+	458.623	337.337	613.973	951.415	1	0.735542	1.33873	2.0745
CC_1779	1989703	1990859	+	149.193	148.273	122.828	157.09	1	0.993833	0.823284	1.05293
CC_1780	1990917	1991719	+	78.3657	17.0503	61.0802	2.70179	1	0.217573	0.779426	0.0344767
CC_1781	1991902	1993835	+	478.083	389.135	513.174	490.374	1	0.813948	1.0734	1.02571
CC_1782	1993938	1994983	+	194.424	103.381	158.875	132.388	1	0.531729	0.817159	0.680922
CC_1783	1995341	1996434	+	397.263	299.999	408.37	445.023	1	0.755164	1.02796	1.12022
CC_1784	1996941	1997134	-	63.2886	61.7264	65.0855	0.578954	1	0.975316	1.02839	0.00914785
CC_1785	1997244	1998580	-	47782.5	60711.8	39144.4	23609.8	1	1.27058	0.81922	0.494108
CC_1786	1998776	1999299	+	76.0866	124.316	114.15	54.8077	1	1.63388	1.50026	0.720333
CC_1787	1999488	2000476	+	100.105	90.6471	95.6256	238.143	1	0.905523	0.955256	2.37894
acrB4	2000573	2003571	+	240.532	264.603	480.798	410.479	1	1.10008	1.9989	1.70655
CC_1789	2003691	2005069	+	95.3712	99.7118	81.7741	112.124	1	1.04551	0.85743	1.17566
CC_1790	2005243	2005937	-	75.7359	17.0503	126.333	176.967	1	0.225128	1.66807	2.33663
CC_1791	2006040	2008621	-	762.444	452.156	839.102	1348.58	1	0.593036	1.10054	1.76876
CC_1792	2008830	2009884	-	192.145	82.4457	344.786	112.703	1	0.429081	1.79441	0.586553
CC_1793	2009996	2010168	-	26.1219	0	1.00132	22.1932	1	0	0.0383324	0.849604
CC_1795	2010291	2010424	+	25.5959	18.5611	12.8502	21.0353	1	0.725157	0.502041	0.821823
CC_1796	2010818	2012163	-	273.316	168.992	254.334	298.161	1	0.618304	0.930551	1.09091
CC_1798	2012888	2013933	+	5015.93	7530.18	3537.48	2191.54	1	1.50125	0.705249	0.436915
CC_1799	2014096	2015666	-	690.389	565.897	721.281	764.799	1	0.819678	1.04475	1.10778
CC_1800	2016076	2016725	+	35.9395	28.4891	13.3509	40.9128	1	0.792696	0.371482	1.13838
CC_1801	2016829	2018327	-	264.199	165.539	165.885	451.777	1	0.626568	0.627877	1.70999
CC_1802	2018650	2019653	+	144.635	200.719	133.342	151.686	1	1.38776	0.921922	1.04875
CC_1803	2019830	2020473	+	62.0614	53.9566	143.856	119.072	1	0.869407	2.31796	1.91861
CC_1804	2020570	2021108	+	48.0362	10.1438	49.3982	25.281	1	0.211171	1.02835	0.52629
CC_1805	2021205	2021986	+	216.864	60.4314	181.739	375.162	1	0.27866	0.83803	1.72994
CC_1806	2022100	2023172	+	223	141.366	306.069	347.18	1	0.633929	1.3725	1.55686
CC_1807	2023280	2024328	+	160.764	106.187	177.567	174.651	1	0.660514	1.10452	1.08639
CC_1808	2024526	2025202	-	30.1541	15.3237	22.3627	36.6671	1	0.508178	0.741614	1.21599
CC_1809	2025476	2028276	-	640.6	477.192	889.836	711.921	1	0.744915	1.38907	1.11133
CC_1810	2028359	2028387	+	37.342	36.6905	43.3903	50.948	1	0.982552	1.16197	1.36436
CC_1811	2028546	2029219	+	116.935	240.646	105.973	168.669	1	2.05795	0.906253	1.44242
CC_1812	2029328	2030862	-	490.881	244.315	451.259	445.988	1	0.497708	0.919285	0.908546
CC_1813	2031205	2032610	+	285.763	139.64	190.417	164.23	1	0.488656	0.666345	0.574707
CC_1814	2032824	2033551	-	132.363	65.1796	106.139	137.019	1	0.492432	0.801884	1.03518
CC_1816	2033729	2035269	+	375.524	171.798	310.575	379.408	1	0.457488	0.827043	1.01034
CC_1817	2035384	2035826	+	103.611	15.5395	23.5309	97.0713	1	0.149979	0.227108	0.936883
CC_1818	2035976	2037507	-	469.668	291.797	341.115	676.991	1	0.621284	0.726289	1.44142
CC_1819	2037707	2039046	+	122.37	104.244	147.193	334.057	1	0.851879	1.20286	2.7299
CC_1820	2039620	2039726	-	51.8931	15.3237	16.5217	13.8949	1	0.295293	0.318379	0.26776
CC_1821	2040097	2040803	-	118.337	116.115	229.969	386.356	1	0.981217	1.94333	3.26486
CC_1822	2040900	2041588	-	72.405	43.5969	59.4114	154.002	1	0.602126	0.820543	2.12695
CC_1823	2041685	2042595	-	12.9733	2.37409	4.00526	1.54388	1	0.182998	0.308731	0.119004
CC_1824	2042692	2043218	-	0.701259	0.431653	0.333772	0.771939	1	0.61554	0.475961	1.10079
CC_1825	2043426	2044315	-	121.142	130.359	101.967	277.898	1	1.07608	0.841714	2.29398
CC_1826	2044977	2045365	+	117.11	30.2157	72.4285	166.16	1	0.258011	0.618464	1.41883
CC_1827	2045462	2046201	+	52.945	56.1149	54.5717	52.6848	1	1.05987	1.03072	0.995086
CC_1828	2046312	2046838	+	64.3405	175.251	100.632	137.791	1	2.72381	1.56406	2.14159
CC_1829	2046949	2050472	+	626.75	398.631	873.815	1083.8	1	0.636029	1.3942	1.72924
CC_1830	2050569	2052253	+	333.449	111.151	212.78	283.495	1	0.333337	0.638118	0.85019
CC_1831	2052394	2053055	-	33.3098	25.2517	62.5822	4.63163	1	0.758086	1.87879	0.139047
CC_1832	2053155	2053870	-	141.304	67.9853	96.46	148.791	1	0.481129	0.682644	1.05299
CC_1833	2054026	2055035	-	248.421	183.452	256.504	509.673	1	0.738474	1.03254	2.05165
2055307,,2055426	2055357	2055376	-	9.64231	6.90645	21.8621	46.3163	1	0.716265	2.26731	4.80345
CC_1834	2055612	2055883	-	131.486	108.561	246.157	246.056	1	0.825644	1.87211	1.87134
CC_1835	2056179	2056414	-	77.6644	25.8992	51.9015	88.773	1	0.333475	0.668279	1.14303
CC_1836	2056592	2056872	+	162.341	39.7121	62.5822	85.6852	1	0.244621	0.385498	0.527809
CC_1837	2057067	2057875	+	126.051	82.014	82.1079	170.213	1	0.65064	0.651385	1.35034
CC_1838	2057972	2058612	+	112.903	83.309	175.23	423.795	1	0.737883	1.55205	3.75363
CC_1840	2058910	2059796	-	104.137	42.302	111.313	191.441	1	0.406215	1.06891	1.83836
CC_1841	2060037	2061064	-	163.393	175.467	314.079	424.952	1	1.07389	1.92223	2.6008
popA	2061393	2062618	+	151.823	65.6112	16.5217	136.054	1	0.432157	0.108822	0.89614
CC_1843	2062800	2063344	+	140.076	92.5895	183.575	176.002	1	0.660993	1.31053	1.25647
CC_1844	2063565	2066932	-	625.698	412.66	779.023	443.865	1	0.65952	1.24505	0.709392
CC_1845	2067037	2067230	-	2.10378	7.12227	16.1879	24.895	1	3.38547	7.6947	11.8335
CC_1846	2067354	2067985	-	171.808	195.323	102.635	345.443	1	1.13686	0.59738	2.01063
CC_1847	2068207	2069660	+	224.578	250.143	282.204	393.11	1	1.11383	1.2566	1.75044
CC_1848	2069835	2070886	-	174.087	90.8629	104.137	255.126	1	0.521938	0.598187	1.4655
CC_1849	2071019	2072376	-	188.989	240.431	189.916	275.196	1	1.27219	1.0049	1.45615
dgcB	2072670	2073631	+	136.395	116.115	200.096	266.512	1	0.851313	1.46704	1.95397
CC_1851	2073868	2074571	+	40.3224	50.935	50.7333	130.072	1	1.2632	1.25819	3.2258
CC_1852	2074658	2074968	-	46.2831	5.39566	13.8515	83.1764	1	0.11658	0.299278	1.79712
CC_1853	2075065	2075369	-	84.8523	20.7193	32.7096	40.1408	1	0.244181	0.385489	0.473067
CC_1854	2075470	2076341	-	163.569	88.7047	103.469	53.2638	1	0.542309	0.632574	0.325636
CC_1855	2076536	2076996	+	71.3531	118.273	104.804	209.774	1	1.65757	1.46881	2.93995
CC_1856	2077093	2077811	+	225.104	62.5897	147.694	149.949	1	0.278048	0.656114	0.666133
CC_1857	2078016	2078116	-	26.6478	2.37409	9.34561	5.59656	1	0.0890913	0.350708	0.210019
CC_1858	2078216	2078517	-	1.75315	2.37409	2.16952	1.54388	1	1.35419	1.2375	0.880633
CC_1859	2078623	2078879	-	1.75315	0.647479	0.166886	0.964924	1	0.369324	0.0951922	0.550395
CC_1860	2078987	2080113	-	14.0252	0.431653	1.66886	0.771939	1	0.030777	0.11899	0.0550395
CC_1861	2080213	2081141	-	0.701259	0.215826	0.166886	0.192985	1	0.30777	0.237981	0.275198
CC_1862	2081238	2081887	-	15.7783	23.7409	11.0145	1.15791	1	1.50465	0.698076	0.0733861
CC_1863	2081980	2082269	-	78.3657	64.7479	35.8805	16.5967	1	0.826228	0.45786	0.211785
CC_1864	2082366	2083735	-	2.80503	4.53235	3.00395	11.1931	1	1.61579	1.07091	3.99037
CC_1865	2083835	2084874	-	1.75315	3.02157	21.1945	0.38597	1	1.72351	12.0894	0.220158
CC_1866	2084971	2085347	-	10.6942	33.8847	46.2274	30.6846	1	3.16852	4.32266	2.86927
CC_1867	2085626	2086176	+	50.3153	34.9639	38.7175	72.9482	1	0.694895	0.769498	1.44982
CC_1868	2086343	2086761	-	193.547	111.151	148.695	179.283	1	0.574281	0.768263	0.926299
CC_1869	2086959	2087992	-	93.7934	35.8272	141.352	215.178	1	0.38198	1.50706	2.29417
CC_1870	2088331	2089490	+	14.7264	7.12227	16.1879	16.9827	1	0.483639	1.09924	1.15321
CC_1871	2089718	2090079	+	223.877	160.143	178.902	181.599	1	0.715318	0.799108	0.811154
CC_1872	2090413	2091464	+	220.371	147.194	343.284	188.546	1	0.667937	1.55776	0.855587
CC_1873	2091545	2091930	+	83.8004	52.0142	82.7754	107.686	1	0.620691	0.987768	1.28502
CC_1874	2092108	2093123	-	15.9536	8.84888	42.8897	93.9836	1	0.554663	2.68839	5.89104
CC_1875	2093302	2095571	-	507.711	336.258	300.728	146.089	1	0.662301	0.592322	0.287741
CC_1876	2095832	2096853	-	38.2186	31.2948	23.0303	1.54388	1	0.818838	0.602593	0.040396
CC_1877	2097530	2100126	+	14.3758	4.53235	1.83574	0.38597	1	0.315277	0.127697	0.0268486
CC_1878	2100369	2101690	+	365.18	94.1003	153.869	59.2463	1	0.257682	0.42135	0.162238
CC_1879	2101815	2102455	+	36.9914	22.6618	25.1998	21.6143	1	0.612623	0.681233	0.584306
thiG	2102666	2103375	-	7.71385	4.53235	25.1998	68.3166	1	0.587561	3.26682	8.85636
thiS	2103620	2103720	-	0	0	0	0	#DIV/0!	#DIV/0!	#DIV/0!	#DIV/0!
CC_1882	2103899	2104239	+	147.089	197.913	137.681	283.881	1	1.34553	0.936038	1.92999
CC_1883	2104400	2104812	+	0	0	0	0.192985	#DIV/0!	#DIV/0!	#DIV/0!	#DIV/0!
CC_1884	2104918	2106164	+	0.525944	1.51079	0.333772	0.38597	1	2.87252	0.634615	0.73386
CC_1885	2106364	2106917	+	60.8342	32.8056	67.4219	75.0711	1	0.539263	1.10829	1.23403
CC_1886	2106954	2107192	+	144.284	76.8342	75.4324	33.0004	1	0.532521	0.522805	0.228718
CC_1887	2107597	2107892	-	8.41511	26.7625	2.00263	0.964924	1	3.18029	0.23798	0.114666
CC_1888	2107992	2108014	-	0	44.4602	1.33509	29.5267	#DIV/0!	#DIV/0!	#DIV/0!	#DIV/0!
CC_1889	2108272	2110895	+	283.309	215.179	294.053	142.23	1	0.759522	1.03792	0.502031
CC_1890	2111067	2111464	+	1486.32	2940.42	1246.47	552.708	1	1.97832	0.83863	0.371864
CC_1891	2111659	2112428	+	49.7894	25.6833	55.0723	8.8773	1	0.51584	1.10611	0.178297
CC_1892	2112606	2114344	-	18.934	27.41	32.209	6.3685	1	1.44766	1.70112	0.336353
CC_1893	2114566	2115227	-	92.3908	137.266	78.2695	38.7899	1	1.48571	0.847156	0.419846
CC_1894	2115467	2117331	+	171.984	66.9062	126.5	7.91238	1	0.389026	0.735532	0.0460065
CC_1895	2117431	2118872	+	371.492	206.546	338.278	343.127	1	0.55599	0.910593	0.923646
CC_1896	2118995	2119104	-	36.1148	14.0287	3.17083	22.3862	1	0.388448	0.0877986	0.619863
CC_1897	2119320	2119816	+	52.4191	27.8416	71.9278	54.0357	1	0.531135	1.37217	1.03084
CC_1898	2119925	2120850	+	119.389	46.4027	34.0447	58.8604	1	0.388667	0.285157	0.493012
CC_1899	2120947	2121635	+	102.91	65.1796	83.2761	132.002	1	0.633367	0.809215	1.28269
CC_1900	2121831	2122321	+	126.402	186.69	123.829	111.352	1	1.47695	0.979648	0.880938
CC_1901	2122472	2123223	+	306.099	247.553	316.249	347.759	1	0.808734	1.03316	1.1361
CC_1902	2123461	2124098	+	9.99294	38.6329	8.01052	36.8601	1	3.86602	0.801618	3.68861
CC_1903	2124269	2124936	-	112.026	197.265	102.969	183.143	1	1.76089	0.919148	1.63482
CC_1904	2125064	2127141	-	220.02	129.928	198.094	105.949	1	0.590526	0.900344	0.481541
CC_1905	2127404	2128716	+	0.701259	3.02157	3.17083	1.15791	1	4.30878	4.52163	1.65119
CC_1906	2128884	2130064	+	58.7304	45.1077	126.5	332.513	1	0.768047	2.1539	5.66168
CC_1907	2130222	2130385	-	39.6211	17.2661	23.8647	9.64924	1	0.435781	0.602322	0.243538
CC_1908	2130482	2132151	-	89.0599	66.6904	61.7478	198.388	1	0.748826	0.693329	2.22758
lpxB	2132337	2133433	-	6.13601	6.25897	10.5138	0	1	1.02004	1.71346	0
lpxI	2133530	2134272	-	10.8695	2.58992	17.6899	7.71939	1	0.238274	1.62748	0.710188
lpxA	2134382	2135073	-	50.3153	37.1221	59.7452	35.8952	1	0.73779	1.18741	0.713405
CC_1912	2135170	2135549	-	0.876573	3.88488	1.33509	0.771939	1	4.43189	1.52308	0.880633
CC_1913	2135652	2136571	-	0.701259	1.29496	2.67017	0.192985	1	1.84662	3.80769	0.275198
CC_1914	2136725	2137263	-	8.06447	3.02157	12.0158	0.578954	1	0.374677	1.48996	0.0717907
CC_1915	2137366	2139629	-	9.29168	34.1006	39.552	0.964924	1	3.67001	4.25671	0.103848
mmpA	2139747	2140924	-	414.619	273.02	325.428	122.545	1	0.658485	0.784883	0.295561
CC_1917	2140966	2142065	-	2.27909	1.72661	0	0.964924	1	0.757588	0	0.423381
CC_1918	2142153	2142898	-	2.27909	3.66905	1.33509	0.38597	1	1.60987	0.585798	0.169352
CC_1919	2142958	2143637	-	0.876573	1.07913	1.00132	0.38597	1	1.23108	1.14231	0.440316
CC_1920	2143789	2144255	-	2.62972	4.1007	12.3496	31.2635	1	1.55937	4.69615	11.8885
CC_1921	2144382	2145022	-	1.2272	11.223	2.67017	0.192985	1	9.14517	2.17582	0.157256
CC_1922	2145300	2146138	-	5.08413	21.3668	10.3469	1.73686	1	4.20265	2.03514	0.341625
CC_1923	2146378	2147084	-	0.876573	0.215826	1.1682	0.964924	1	0.246216	1.33269	1.10079
CC_1924	2147497	2148047	+	43.3027	88.0572	122.661	222.125	1	2.03353	2.83264	5.1296
CC_1925	2148160	2148689	-	246.492	153.453	396.855	504.655	1	0.622545	1.61001	2.04735
CC_1926	2148957	2152288	-	2066.43	3233.08	1612.62	834.852	1	1.56457	0.780387	0.404006
CC_1927	2152424	2152446	-	6.83727	0.431653	0	0	1	0.0631323	0	0
[truncated: 1,871 more rows]

## Sheet: 100bp
				Tn insertion				ratio to the WT
CDS	probe start	probe stop	orientation	WT	∆cpdR	∆tipN	∆tipN; ∆cpdR	WT	∆cpdR	∆tipN	∆tipN; ∆cpdR
	1	100		0.175315	0	0	0	1	0	0	0
	51	150		0.525944	0	0	0	1	0	0	0
	101	200		0.876573	0	0	0	1	0	0	0
CC_0001	151	250	+	14.2005	7.76975	4.67281	2.31582	1	0.547147	0.329059	0.16308
CC_0001	201	300	+	24.5441	11.223	7.17609	2.5088	1	0.457258	0.292376	0.102216
CC_0001	251	350	+	48.3869	19.6402	8.67807	2.70179	1	0.4059	0.179348	0.0558372
CC_0001	301	400	+	54.3475	20.9352	5.00658	0.38597	1	0.385209	0.0921215	0.00710188
CC_0001	351	450	+	43.6534	17.4819	2.83706	0.192985	1	0.400472	0.0649907	0.00442085
CC_0001	401	500	+	19.2846	9.06471	1.33509	0	1	0.470049	0.0692307	0
CC_0001	451	550	+	2.10378	0	0	0	1	0	0	0
CC_0001	501	600	+	11.5708	2.15826	0.333772	0.192985	1	0.186527	0.0288461	0.0166786
CC_0001	551	650	+	20.3365	3.45322	1.1682	0.192985	1	0.169804	0.0574436	0.00948958
CC_0001	601	700	+	18.7587	3.88488	1.50197	0.192985	1	0.207098	0.0800682	0.0102878
CC_0001	651	750	+	18.934	15.1078	15.3535	0.38597	1	0.797922	0.810896	0.020385
CC_0001	701	800	+	15.2524	22.4459	27.2024	0.38597	1	1.47164	1.78349	0.0253055
CC_0001	751	850	+	14.7264	22.0143	26.8686	0.38597	1	1.49488	1.82452	0.0262093
CC_0001	801	900	+	8.94105	11.8705	25.7004	0	1	1.32764	2.87443	0
CC_0001	851	950	+	6.83727	4.74818	25.0329	0	1	0.694455	3.66124	0
CC_0001	901	1000	+	6.83727	4.74818	25.1998	0.192985	1	0.694455	3.68565	0.0282254
CC_0001	951	1050	+	2.98035	1.51079	12.6833	0.192985	1	0.506915	4.25565	0.0647524
CC_0001	1001	1100	+	0.876573	11.4388	5.00658	0.192985	1	13.0495	5.71153	0.220158
CC_0001	1051	1150	+	3.15566	23.9567	8.67807	1.54388	1	7.59166	2.75	0.48924
CC_0001	1101	1200	+	3.15566	23.9567	8.51118	1.73686	1	7.59166	2.69711	0.550395
CC_0002	1151	1250	+	2.27909	12.5179	5.00658	1.73686	1	5.49251	2.19674	0.762086
CC_0002	1201	1300	+	0	0	1.1682	0.192985	#DIV/0!	#DIV/0!	#DIV/0!	#DIV/0!
CC_0002	1251	1350	+	0	0	0.83443	0.192985	#DIV/0!	#DIV/0!	#DIV/0!	#DIV/0!
CC_0002	1301	1400	+	0	0	0	0.192985	#DIV/0!	#DIV/0!	#DIV/0!	#DIV/0!
CC_0002	1351	1450	+	0	0.215826	0	0.192985	#DIV/0!	#DIV/0!	#DIV/0!	#DIV/0!
CC_0002	1401	1500	+	29.8035	27.8416	36.7149	0.38597	1	0.934173	1.2319	0.0129505
CC_0002	1451	1550	+	50.3153	64.3163	83.2761	29.9126	1	1.27826	1.65508	0.594504
CC_0002	1501	1600	+	56.802	67.7695	88.4495	63.492	1	1.19308	1.55716	1.11778
CC_0002	1551	1650	+	39.4458	44.0286	57.4087	67.7377	1	1.11618	1.45538	1.71723
CC_0002	1601	1700	+	18.934	7.55392	10.8476	38.211	1	0.398961	0.572916	2.01812
CC_0002	1651	1750	+	17.3562	5.82731	6.84232	6.56148	1	0.335749	0.39423	0.378049
CC_0002	1701	1800	+	22.0896	12.9496	17.6899	66.5798	1	0.586229	0.800823	3.01407
CC_0003	1751	1850	+	33.4851	18.7769	32.8765	124.475	1	0.560754	0.981825	3.71733
CC_0003	1801	1900	+	33.4851	17.2661	32.8765	124.475	1	0.515636	0.981825	3.71733
CC_0003	1851	1950	+	16.4796	6.25897	16.3548	59.8253	1	0.379801	0.992429	3.63027
CC_0003	1901	2000	+	61.3601	145.683	38.3838	17.1756	1	2.37423	0.625549	0.279915
CC_0003	1951	2050	+	61.7108	160.575	39.8857	17.1756	1	2.60206	0.646333	0.278325
CC_0003	2001	2100	+	61.5355	160.575	39.8857	17.1756	1	2.60947	0.648175	0.279118
CC_0003	2051	2150	+	7.53853	15.9712	14.5191	0.964924	1	2.1186	1.92598	0.127999
CC_0003	2101	2200	+	18.7587	10.3597	30.8739	3.66671	1	0.55226	1.64585	0.195468
CC_0003	2151	2250	+	18.934	17.6978	31.2077	9.45625	1	0.934709	1.64824	0.499433
CC_0003	2201	2300	+	16.6549	17.4819	20.1932	8.49133	1	1.04966	1.21245	0.50984
CC_0003	2251	2350	+	14.2005	16.4028	9.17872	6.17551	1	1.15509	0.646367	0.43488
CC_0003	2301	2400	+	14.5511	13.5971	13.6846	1.15791	1	0.934434	0.940453	0.0795752
CC_0003	2351	2450	+	17.5315	20.7193	16.1879	13.8949	1	1.18184	0.923364	0.792569
CC_0003	2401	2500	+	10.8695	20.5035	10.8476	36.0882	1	1.88633	0.997983	3.32013
CC_0003	2451	2550	+	6.13601	15.1078	4.00526	35.3162	1	2.46216	0.652746	5.75556
CC_0003	2501	2600	+	3.15566	8.84888	1.66886	23.1582	1	2.80413	0.528846	7.3386
CC_0003	2551	2650	+	0.701259	1.51079	0.166886	0.578954	1	2.15439	0.237981	0.825593
CC_0004	2601	2700	+	0	1.94244	0.166886	0.578954	#DIV/0!	#DIV/0!	#DIV/0!	#DIV/0!
CC_0004	2651	2750	+	0	1.51079	0.166886	0	#DIV/0!	#DIV/0!	#DIV/0!	#DIV/0!
CC_0004	2701	2800	+	0	0.863306	0.166886	0	#DIV/0!	#DIV/0!	#DIV/0!	#DIV/0!
CC_0004	2751	2850	+	0	0.431653	0.166886	0	#DIV/0!	#DIV/0!	#DIV/0!	#DIV/0!
CC_0004	2801	2900	+	1381.83	2232.29	943.072	614.85	1	1.61546	0.68248	0.444953
CC_0004	2851	2950	+	1381.83	2232.29	943.239	614.85	1	1.61546	0.682601	0.444953
CC_0004	2901	3000	+	1381.83	2232.29	943.239	614.85	1	1.61546	0.682601	0.444953
CC_0004	2951	3050	+	0.350629	0.215826	0.333772	0	1	0.61554	0.951922	0
CC_0004	3001	3100	+	0.350629	0.215826	0.166886	0	1	0.61554	0.475961	0
CC_0004	3051	3150	+	0.350629	0.215826	0.166886	0	1	0.61554	0.475961	0
CC_0004	3101	3200	+	0	0.215826	0	0	#DIV/0!	#DIV/0!	#DIV/0!	#DIV/0!
CC_0004	3151	3250	+	0	0.215826	0	0	#DIV/0!	#DIV/0!	#DIV/0!	#DIV/0!
dnaQ	3201	3300	+	0	0.215826	0	0	#DIV/0!	#DIV/0!	#DIV/0!	#DIV/0!
dnaQ	3251	3350	+	0.175315	0	0.166886	0.192985	1	0	0.951922	1.10079
dnaQ	3301	3400	+	0.350629	0	0.166886	0.192985	1	0	0.475961	0.550395
dnaQ	3351	3450	+	0.350629	0	0.166886	0.192985	1	0	0.475961	0.550395
dnaQ	3401	3500	+	0.175315	0	0	0	1	0	0	0
dnaQ	3451	3550	+	0	0.863306	0.667544	0	#DIV/0!	#DIV/0!	#DIV/0!	#DIV/0!
dnaQ	3501	3600	+	0.876573	1.07913	1.33509	0.192985	1	1.23108	1.52308	0.220158
dnaQ	3551	3650	+	5.61007	3.2374	1.33509	0.192985	1	0.577069	0.23798	0.0343997
dnaQ	3601	3700	+	10.6942	5.61149	2.16952	0.771939	1	0.524723	0.202869	0.072183
dnaQ	3651	3750	+	10.1683	6.90645	2.16952	0.771939	1	0.679217	0.213362	0.0759166
dnaQ	3701	3800	+	5.61007	6.47479	3.33772	1.15791	1	1.15414	0.594951	0.206398
dnaQ	3751	3850	+	0.525944	3.2374	1.83574	0.578954	1	6.1554	3.49038	1.10079
dnaQ	3801	3900	+	3.50629	1.72661	3.67149	0.38597	1	0.492432	1.04711	0.110079
dnaQ	3851	3950	+	27.6997	30.4315	19.8594	5.21059	1	1.09862	0.716954	0.18811
dnaQ	3901	4000	+	48.5622	72.7335	47.7294	23.5441	1	1.49774	0.982851	0.484825
CC_0006	3951	4050	+	53.1203	78.7766	60.0789	31.8425	1	1.48298	1.131	0.599441
CC_0006	4001	4100	+	28.7516	48.3451	42.7228	26.6319	1	1.68148	1.48593	0.926275
CC_0006	4051	4150	+	5.08413	6.04314	12.3496	8.29835	1	1.18863	2.42904	1.63221
CC_0006	4101	4200	+	0	0	0	0	#DIV/0!	#DIV/0!	#DIV/0!	#DIV/0!
CC_0006	4151	4250	+	3.68161	4.1007	4.83969	7.71939	1	1.11383	1.31456	2.09674
CC_0006	4201	4300	+	9.64231	6.04314	11.5151	15.6318	1	0.626732	1.19423	1.62116
CC_0006	4251	4350	+	11.3955	7.76975	11.5151	23.7371	1	0.681829	1.0105	2.08303
CC_0006	4301	4400	+	7.71385	3.66905	6.67544	16.0177	1	0.475645	0.865384	2.07649
CC_0006	4351	4450	+	1.75315	1.72661	0	8.10536	1	0.984864	0	4.62332
CC_0006	4401	4500	+	0	0	0	0	#DIV/0!	#DIV/0!	#DIV/0!	#DIV/0!
CC_0006	4451	4550	+	0	0	0	0	#DIV/0!	#DIV/0!	#DIV/0!	#DIV/0!
CC_0006	4501	4600	+	0	0	0	0	#DIV/0!	#DIV/0!	#DIV/0!	#DIV/0!
CC_0006	4551	4650	+	0.876573	3.45322	4.67281	19.8774	1	3.93946	5.33076	22.6763
CC_0006	4601	4700	+	0.876573	6.69062	9.5125	26.4389	1	7.6327	10.8519	30.1617
CC_0006	4651	4750	+	2.98035	7.55392	10.8476	27.5968	1	2.53458	3.6397	9.25959
CC_0006	4701	4800	+	3.68161	6.25897	9.01184	9.45625	1	1.70006	2.4478	2.56851
CC_0006	4751	4850	+	3.68161	3.66905	4.67281	2.89477	1	0.996589	1.26923	0.786279
CC_0006	4801	4900	+	1.57783	3.2374	4.00526	2.12283	1	2.0518	2.53846	1.34541
CC_0007	4851	4950	+	0	1.07913	1.1682	0.38597	#DIV/0!	#DIV/0!	#DIV/0!	#DIV/0!
CC_0007	4901	5000	+	0	0.431653	0.667544	0.38597	#DIV/0!	#DIV/0!	#DIV/0!	#DIV/0!
CC_0007	4951	5050	+	0	0	0	0	#DIV/0!	#DIV/0!	#DIV/0!	#DIV/0!
CC_0007	5001	5100	+	0	0	0	0	#DIV/0!	#DIV/0!	#DIV/0!	#DIV/0!
CC_0007	5051	5150	+	0	0	0	0	#DIV/0!	#DIV/0!	#DIV/0!	#DIV/0!
CC_0007	5101	5200	+	0.175315	0	0.333772	1.15791	1	0	1.90384	6.60474
CC_0007	5151	5250	+	0.175315	0.431653	0.333772	1.54388	1	2.46216	1.90384	8.80633
CC_0007	5201	5300	+	0.701259	1.29496	5.00658	1.54388	1	1.84662	7.13942	2.20158
	5251	5350		1.2272	4.74818	18.1906	0.578954	1	3.86911	14.8228	0.471767
	5301	5400		2.10378	7.12227	32.5427	0.192985	1	3.38547	15.4687	0.0917326
	5351	5450		3.33098	8.84888	27.8699	0.192985	1	2.65654	8.36689	0.0579364
	5401	5500		3.85692	6.47479	15.1866	0.578954	1	1.67875	3.9375	0.150108
	5451	5550		2.98035	3.66905	2.00263	0.964924	1	1.23108	0.671945	0.323762
	5501	5600		1.2272	1.07913	2.00263	0.964924	1	0.879343	1.63187	0.786279
dnaA	5551	5650	+	0	0	1.1682	0.38597	#DIV/0!	#DIV/0!	#DIV/0!	#DIV/0!
dnaA	5601	5700	+	0	0	0	0	#DIV/0!	#DIV/0!	#DIV/0!	#DIV/0!
dnaA	5651	5750	+	0	0	0	0	#DIV/0!	#DIV/0!	#DIV/0!	#DIV/0!
dnaA	5701	5800	+	0	0	0	0	#DIV/0!	#DIV/0!	#DIV/0!	#DIV/0!
dnaA	5751	5850	+	0	0	0	0	#DIV/0!	#DIV/0!	#DIV/0!	#DIV/0!
dnaA	5801	5900	+	0	0	0	0	#DIV/0!	#DIV/0!	#DIV/0!	#DIV/0!
dnaA	5851	5950	+	0	0	0	0	#DIV/0!	#DIV/0!	#DIV/0!	#DIV/0!
dnaA	5901	6000	+	0	0	0	0	#DIV/0!	#DIV/0!	#DIV/0!	#DIV/0!
dnaA	5951	6050	+	0	0	0	0	#DIV/0!	#DIV/0!	#DIV/0!	#DIV/0!
dnaA	6001	6100	+	0	0	0.166886	0	#DIV/0!	#DIV/0!	#DIV/0!	#DIV/0!
dnaA	6051	6150	+	0.175315	0	0.500658	0.192985	1	0	2.85577	1.10079
dnaA	6101	6200	+	0.350629	0	0.500658	0.38597	1	0	1.42788	1.10079
dnaA	6151	6250	+	0.350629	0	0.333772	0.38597	1	0	0.951922	1.10079
dnaA	6201	6300	+	0.525944	0.215826	0	0.38597	1	0.41036	0	0.73386
dnaA	6251	6350	+	0.525944	0.215826	0	0.192985	1	0.41036	0	0.36693
dnaA	6301	6400	+	0.525944	0.215826	0	0.192985	1	0.41036	0	0.36693
dnaA	6351	6450	+	0.175315	0	0	0	1	0	0	0
dnaA	6401	6500	+	0	0	0	0	#DIV/0!	#DIV/0!	#DIV/0!	#DIV/0!
dnaA	6451	6550	+	0	0	0	0	#DIV/0!	#DIV/0!	#DIV/0!	#DIV/0!
dnaA	6501	6600	+	0	0	0	0	#DIV/0!	#DIV/0!	#DIV/0!	#DIV/0!
dnaA	6551	6650	+	0	0	0	0	#DIV/0!	#DIV/0!	#DIV/0!	#DIV/0!
dnaA	6601	6700	+	0	0	0.166886	0	#DIV/0!	#DIV/0!	#DIV/0!	#DIV/0!
dnaA	6651	6750	+	0	0	0.166886	0	#DIV/0!	#DIV/0!	#DIV/0!	#DIV/0!
dnaA	6701	6800	+	0	0	0.166886	0	#DIV/0!	#DIV/0!	#DIV/0!	#DIV/0!
dnaA	6751	6850	+	0	0	0	0	#DIV/0!	#DIV/0!	#DIV/0!	#DIV/0!
dnaA	6801	6900	+	0.350629	0.215826	0.166886	0	1	0.61554	0.475961	0
dnaA	6851	6950	+	0.350629	0.215826	0.166886	0	1	0.61554	0.475961	0
dnaA	6901	7000	+	0.350629	0.215826	0.166886	0	1	0.61554	0.475961	0
dnaA	6951	7050	+	0	0	0	0	#DIV/0!	#DIV/0!	#DIV/0!	#DIV/0!
dnaA	7001	7100	+	11.5708	1.72661	3.83838	4.63163	1	0.149222	0.33173	0.400288
dnaA	7051	7150	+	24.7194	2.58992	10.18	13.123	1	0.104773	0.411824	0.530878
dnaA	7101	7200	+	26.1219	2.80574	13.0171	13.8949	1	0.10741	0.498322	0.531926
alkB	7151	7250	-	14.7264	1.07913	9.17872	9.26327	1	0.0732786	0.623282	0.629023
alkB	7201	7300	-	1.57783	0.215826	3.33772	0.771939	1	0.136787	2.11538	0.48924
alkB	7251	7350	-	0.350629	0	0.500658	0	1	0	1.42788	0
alkB	7301	7400	-	0.175315	0.215826	0.500658	0	1	1.23108	2.85577	0
alkB	7351	7450	-	0.350629	0.431653	0.166886	0.38597	1	1.23108	0.475961	1.10079
alkB	7401	7500	-	0.175315	1.07913	0.333772	1.73686	1	6.1554	1.90384	9.90712
alkB	7451	7550	-	4.55818	2.37409	7.00921	6.3685	1	0.520842	1.53772	1.39716
alkB	7501	7600	-	9.46699	3.2374	14.1853	10.0352	1	0.341967	1.4984	1.06002
alkB	7551	7650	-	26.2972	67.7695	55.0723	12.351	1	2.57706	2.09423	0.469671
alkB	7601	7700	-	42.9521	129.28	96.7938	13.7019	1	3.00987	2.25353	0.319005
alkB	7651	7750	-	40.4977	129.928	97.2945	9.64924	1	3.20827	2.40247	0.238266
alkB	7701	7800	-	26.8231	75.7551	89.4508	13.5089	1	2.82424	3.33484	0.50363
alkB	7751	7850	-	5.78538	12.7338	41.0539	7.52641	1	2.20102	7.09615	1.30093
	7801	7900		0.175315	2.37409	11.8489	2.31582	1	13.5419	67.5865	13.2095
	7851	7950		3.68161	4.96401	30.707	4.24566	1	1.34833	8.34065	1.15321
	7901	8000		5.08413	6.90645	37.5493	4.24566	1	1.35843	7.3856	0.835083
	7951	8050		7.1879	4.96401	28.3706	1.92985	1	0.690606	3.94699	0.268486
	8001	8100		6.31133	3.02157	19.6925	0	1	0.478753	3.12019	0
	8051	8150		5.61007	1.29496	23.364	0	1	0.230828	4.16466	0
dnaK	8101	8200	+	3.33098	0.863306	20.6939	0	1	0.259175	6.21254	0
dnaK	8151	8250	+	0.701259	0.215826	10.5138	0	1	0.30777	14.9928	0
dnaK	8201	8300	+	0	0	0	0	#DIV/0!	#DIV/0!	#DIV/0!	#DIV/0!
dnaK	8251	8350	+	0	0	0	0	#DIV/0!	#DIV/0!	#DIV/0!	#DIV/0!
dnaK	8301	8400	+	0	0.215826	0	0.578954	#DIV/0!	#DIV/0!	#DIV/0!	#DIV/0!
dnaK	8351	8450	+	0	0.215826	0.166886	0.578954	#DIV/0!	#DIV/0!	#DIV/0!	#DIV/0!
dnaK	8401	8500	+	0.175315	0.215826	0.166886	0.578954	1	1.23108	0.951922	3.30237
dnaK	8451	8550	+	0.175315	0	0.333772	0	1	0	1.90384	0
dnaK	8501	8600	+	0.175315	0	0.166886	0	1	0	0.951922	0
dnaK	8551	8650	+	0	0	0.166886	0	#DIV/0!	#DIV/0!	#DIV/0!	#DIV/0!
dnaK	8601	8700	+	0	0	0	0	#DIV/0!	#DIV/0!	#DIV/0!	#DIV/0!
dnaK	8651	8750	+	0	0	0	0	#DIV/0!	#DIV/0!	#DIV/0!	#DIV/0!
dnaK	8701	8800	+	0	0	0	0	#DIV/0!	#DIV/0!	#DIV/0!	#DIV/0!
dnaK	8751	8850	+	0	0	0	0	#DIV/0!	#DIV/0!	#DIV/0!	#DIV/0!
dnaK	8801	8900	+	0.525944	0	0.500658	0	1	0	0.951922	0
dnaK	8851	8950	+	0.525944	0	0.500658	0	1	0	0.951922	0
dnaK	8901	9000	+	0.701259	0	0.500658	0	1	0	0.713942	0
dnaK	8951	9050	+	0.175315	0	0	0	1	0	0	0
dnaK	9001	9100	+	0.175315	0.215826	0	0	1	1.23108	0	0
dnaK	9051	9150	+	0	0.215826	0	0	#DIV/0!	#DIV/0!	#DIV/0!	#DIV/0!
dnaK	9101	9200	+	0	0.215826	0	0	#DIV/0!	#DIV/0!	#DIV/0!	#DIV/0!
dnaK	9151	9250	+	0	0	0	0	#DIV/0!	#DIV/0!	#DIV/0!	#DIV/0!
dnaK	9201	9300	+	0	0	0	0	#DIV/0!	#DIV/0!	#DIV/0!	#DIV/0!
dnaK	9251	9350	+	0.350629	0.431653	0	0	1	1.23108	0	0
dnaK	9301	9400	+	0.350629	0.431653	0	0	1	1.23108	0	0
dnaK	9351	9450	+	0.350629	0.431653	0	0	1	1.23108	0	0
dnaK	9401	9500	+	0	0	0	0	#DIV/0!	#DIV/0!	#DIV/0!	#DIV/0!
dnaK	9451	9550	+	0	0	0.333772	0	#DIV/0!	#DIV/0!	#DIV/0!	#DIV/0!
dnaK	9501	9600	+	0	0	0.333772	0	#DIV/0!	#DIV/0!	#DIV/0!	#DIV/0!
dnaK	9551	9650	+	0	0	0.333772	0	#DIV/0!	#DIV/0!	#DIV/0!	#DIV/0!
dnaK	9601	9700	+	0	0	0.166886	0	#DIV/0!	#DIV/0!	#DIV/0!	#DIV/0!
dnaK	9651	9750	+	0	0	0.333772	0	#DIV/0!	#DIV/0!	#DIV/0!	#DIV/0!
dnaK	9701	9800	+	0	0.215826	0.333772	0	#DIV/0!	#DIV/0!	#DIV/0!	#DIV/0!
dnaK	9751	9850	+	0	0.215826	0.166886	0	#DIV/0!	#DIV/0!	#DIV/0!	#DIV/0!
dnaK	9801	9900	+	0.701259	0.431653	0.83443	0	1	0.61554	1.1899	0
dnaK	9851	9950	+	14.7264	12.0863	55.573	2.12283	1	0.82072	3.77369	0.144151
dnaK	9901	10000	+	25.7713	19.4244	106.807	2.89477	1	0.753723	4.14442	0.112326
dnaK	9951	10050	+	25.7713	24.1726	107.475	3.08776	1	0.937966	4.17033	0.119814
dnaK	10001	10100	+	11.7461	17.4819	57.4087	0.964924	1	1.48832	4.88748	0.0821486
dnaK	10051	10150	+	5.08413	11.8705	17.6899	2.5088	1	2.33481	3.47944	0.493458
	10101	10200		11.7461	10.1438	29.5388	5.0176	1	0.863594	2.51478	0.427173
dnaJ	10151	10250	+	13.8499	7.76975	25.3667	5.21059	1	0.560999	1.83155	0.37622
dnaJ	10201	10300	+	9.46699	6.04314	13.8515	2.89477	1	0.638338	1.46314	0.305775
dnaJ	10251	10350	+	2.10378	2.80574	0.500658	0.192985	1	1.33367	0.23798	0.0917326
dnaJ	10301	10400	+	0	0	0	0	#DIV/0!	#DIV/0!	#DIV/0!	#DIV/0!
dnaJ	10351	10450	+	0	0	0	0	#DIV/0!	#DIV/0!	#DIV/0!	#DIV/0!
dnaJ	10401	10500	+	0	0	0	0	#DIV/0!	#DIV/0!	#DIV/0!	#DIV/0!
dnaJ	10451	10550	+	0	0	0	0	#DIV/0!	#DIV/0!	#DIV/0!	#DIV/0!
dnaJ	10501	10600	+	0	0	0.166886	0	#DIV/0!	#DIV/0!	#DIV/0!	#DIV/0!
dnaJ	10551	10650	+	0	0	0.166886	0	#DIV/0!	#DIV/0!	#DIV/0!	#DIV/0!
dnaJ	10601	10700	+	0	0	0.166886	0	#DIV/0!	#DIV/0!	#DIV/0!	#DIV/0!
dnaJ	10651	10750	+	0	0	0	0	#DIV/0!	#DIV/0!	#DIV/0!	#DIV/0!
dnaJ	10701	10800	+	0	0	0	0	#DIV/0!	#DIV/0!	#DIV/0!	#DIV/0!
dnaJ	10751	10850	+	0	0	0	0	#DIV/0!	#DIV/0!	#DIV/0!	#DIV/0!
dnaJ	10801	10900	+	0.175315	0	0	0	1	0	0	0
dnaJ	10851	10950	+	0.525944	0	0	0	1	0	0	0
dnaJ	10901	11000	+	0.701259	1.72661	0.166886	0	1	2.46216	0.237981	0
dnaJ	10951	11050	+	0.525944	4.53235	0.166886	0	1	8.61756	0.317307	0
dnaJ	11001	11100	+	0.175315	4.53235	0.166886	0	1	25.8527	0.951922	0
dnaJ	11051	11150	+	4.55818	3.02157	3.5046	0	1	0.662889	0.76886	0
dnaJ	11101	11200	+	12.6227	0.647479	9.01184	0	1	0.051295	0.713942	0
dnaJ	11151	11250	+	12.6227	0.647479	9.01184	0	1	0.051295	0.713942	0
dnaJ	11201	11300	+	8.06447	0.431653	5.50723	0	1	0.0535252	0.682901	0
dnaJ	11251	11350	+	1.05189	2.37409	3.83838	7.33342	1	2.25698	3.64903	6.97167
dnaJ	11301	11400	+	5.08413	7.12227	10.5138	15.8248	1	1.40088	2.06797	3.11258
dnaJ	11351	11450	+	22.6156	10.7913	19.6925	33.9653	1	0.477163	0.87075	1.50185
mutS	11401	11500	+	31.206	8.63306	23.1971	38.211	1	0.276647	0.743355	1.22448
mutS	11451	11550	+	27.3491	5.61149	16.5217	29.7197	1	0.20518	0.604104	1.08668
mutS	11501	11600	+	16.1289	5.17983	12.3496	11.5791	1	0.321151	0.765676	0.717907
mutS	11551	11650	+	14.5511	15.9712	10.6807	0	1	1.09759	0.734012	0
mutS	11601	11700	+	31.0307	16.4028	28.5375	17.7546	1	0.528599	0.919653	0.572162
mutS	11651	11750	+	32.4332	10.1438	32.209	26.4389	1	0.312761	0.993086	0.81518
mutS	11701	11800	+	25.9466	28.7049	27.0355	26.4389	1	1.10631	1.04197	1.01898
mutS	11751	11850	+	9.64231	39.7121	9.17872	8.68431	1	4.11852	0.951922	0.900647
mutS	11801	11900	+	1.75315	38.2013	0	0	1	21.7901	0	0
mutS	11851	11950	+	0.350629	13.1654	0	0	1	37.5479	0	0
mutS	11901	12000	+	0	0.215826	0	0	#DIV/0!	#DIV/0!	#DIV/0!	#DIV/0!
mutS	11951	12050	+	0	0.215826	0	0	#DIV/0!	#DIV/0!	#DIV/0!	#DIV/0!
mutS	12001	12100	+	0	0.215826	0	0	#DIV/0!	#DIV/0!	#DIV/0!	#DIV/0!
mutS	12051	12150	+	1.75315	5.82731	8.84495	0.578954	1	3.32392	5.04519	0.330237
mutS	12101	12200	+	1.92846	9.92802	17.1892	0.771939	1	5.14815	8.91345	0.400288
mutS	12151	12250	+	1.92846	10.1438	17.1892	0.771939	1	5.26007	8.91345	0.400288
mutS	12201	12300	+	0.175315	4.31653	8.3443	0.192985	1	24.6216	47.5961	1.10079
mutS	12251	12350	+	0	0.215826	0	0	#DIV/0!	#DIV/0!	#DIV/0!	#DIV/0!
mutS	12301	12400	+	0	0.647479	0.166886	0	#DIV/0!	#DIV/0!	#DIV/0!	#DIV/0!
mutS	12351	12450	+	0.175315	0.647479	0.500658	0	1	3.69324	2.85577	0
mutS	12401	12500	+	0.175315	0.647479	0.500658	0	1	3.69324	2.85577	0
mutS	12451	12550	+	0.175315	0	0.333772	0	1	0	1.90384	0
mutS	12501	12600	+	8.59042	4.96401	3.83838	0	1	0.577854	0.44682	0
mutS	12551	12650	+	11.3955	8.41723	9.67938	0	1	0.738648	0.849407	0
mutS	12601	12700	+	11.3955	8.41723	9.84627	0	1	0.738648	0.864052	0
mutS	12651	12750	+	2.80503	3.45322	6.00789	0	1	1.23108	2.14182	0
mutS	12701	12800	+	0.525944	0	0.166886	0	1	0	0.317307	0
mutS	12751	12850	+	0.525944	0	0.166886	0	1	0	0.317307	0
mutS	12801	12900	+	0.350629	0	0.500658	0	1	0	1.42788	0
mutS	12851	12950	+	1.92846	9.06471	2.83706	0.192985	1	4.70049	1.47115	0.100072
mutS	12901	13000	+	2.98035	22.2301	4.50592	0.192985	1	7.4589	1.51188	0.0647524
mutS	12951	13050	+	2.98035	22.2301	4.17215	0.192985	1	7.4589	1.39989	0.0647524
mutS	13001	13100	+	2.45441	16.6186	2.83706	0	1	6.77094	1.15591	0
mutS	13051	13150	+	2.62972	6.04314	1.33509	0	1	2.29802	0.507692	0
mutS	13101	13200	+	2.80503	6.04314	1.33509	0	1	2.15439	0.475961	0
mutS	13151	13250	+	18.7587	3.02157	3.5046	0	1	0.161076	0.186826	0
mutS	13201	13300	+	35.4136	0.863306	7.00921	0	1	0.0243778	0.197924	0
mutS	13251	13350	+	60.4836	7.76975	27.0355	3.28074	1	0.128461	0.446989	0.0542419
mutS	13301	13400	+	68.3727	16.187	43.5572	10.6142	1	0.236746	0.637055	0.15524
mutS	13351	13450	+	50.8413	17.0503	40.7202	12.351	1	0.335363	0.800927	0.242933
mutS	13401	13500	+	33.4851	16.6186	30.5401	9.64924	1	0.496299	0.912051	0.288165
mutS	13451	13550	+	20.5118	14.0287	21.1945	2.70179	1	0.683933	1.03328	0.131719
mutS	13501	13600	+	20.1612	12.7338	20.3601	0.964924	1	0.631598	1.00987	0.0478605
mutS	13551	13650	+	34.3617	25.2517	41.2208	22.3862	1	0.734879	1.19962	0.651488
mutS	13601	13700	+	62.2367	45.7552	61.7478	47.2813	1	0.73518	0.992144	0.759701
mutS	13651	13750	+	69.9506	48.9926	64.9186	52.1059	1	0.700389	0.928064	0.744896
mutS	13701	13800	+	51.8931	32.374	35.2129	30.1056	1	0.623858	0.678566	0.580146
mutS	13751	13850	+	13.4992	5.61149	7.67675	4.82462	1	0.415689	0.568681	0.3574
mutS	13801	13900	+	6.66196	3.45322	5.17346	1.54388	1	0.51835	0.776568	0.231745
mutS	13851	13950	+	4.20755	1.51079	6.84232	1.73686	1	0.359065	1.6262	0.412797
mutS	13901	14000	+	2.45441	1.51079	3.5046	1.73686	1	0.61554	1.42788	0.707651
mutS	13951	14050	+	1.92846	0.431653	2.67017	0.192985	1	0.223833	1.38461	0.100072
mutS	14001	14100	+	0.350629	0.215826	0	0	1	0.61554	0	0
mutS	14051	14150	+	27.875	14.892	41.2208	27.5968	1	0.534242	1.47877	0.990019
mutS	14101	14200	+	55.7501	25.0359	82.7754	54.0357	1	0.449073	1.48476	0.96925
mutS	14151	14250	+	55.7501	25.0359	83.1092	54.2287	1	0.449073	1.49075	0.972711
CC_0013	14201	14300	+	29.4529	13.5971	43.7241	27.2109	1	0.461655	1.48455	0.923878
CC_0013	14251	14350	+	1.2272	3.45322	2.16952	0.771939	1	2.8139	1.76785	0.629023
CC_0013	14301	14400	+	1.2272	3.45322	1.83574	0.578954	1	2.8139	1.49588	0.471767
CC_0013	14351	14450	+	0.350629	0.215826	0	0	1	0.61554	0	0
CC_0013	14401	14500	+	0.350629	0.215826	0	0	1	0.61554	0	0
CC_0013	14451	14550	+	0	19.6402	2.83706	0	#DIV/0!	#DIV/0!	#DIV/0!	#DIV/0!
CC_0013	14501	14600	+	0.175315	47.266	5.67412	0	1	269.607	32.3653	0
CC_0013	14551	14650	+	0.525944	47.266	6.00789	0	1	89.8689	11.4231	0
CC_0013	14601	14700	+	0.525944	27.6258	3.67149	0	1	52.5261	6.98076	0
CC_0013	14651	14750	+	0.350629	0	0.83443	0	1	0	2.3798	0
CC_0013	14701	14800	+	0	0	0.500658	0	#DIV/0!	#DIV/0!	#DIV/0!	#DIV/0!
CC_0013	14751	14850	+	0.175315	0.431653	0.166886	0	1	2.46216	0.951922	0
CC_0013	14801	14900	+	0.175315	0.431653	0.166886	0	1	2.46216	0.951922	0
CC_0013	14851	14950	+	0.175315	0.431653	0.166886	0	1	2.46216	0.951922	0
CC_0013	14901	15000	+	0	0.215826	0.166886	0	#DIV/0!	#DIV/0!	#DIV/0!	#DIV/0!
CC_0013	14951	15050	+	0	0.215826	0.166886	0	#DIV/0!	#DIV/0!	#DIV/0!	#DIV/0!
CC_0013	15001	15100	+	0	0.215826	0.166886	0	#DIV/0!	#DIV/0!	#DIV/0!	#DIV/0!
CC_0013	15051	15150	+	0	0	0	0	#DIV/0!	#DIV/0!	#DIV/0!	#DIV/0!
CC_0013	15101	15200	+	0	0.863306	0	0	#DIV/0!	#DIV/0!	#DIV/0!	#DIV/0!
CC_0013	15151	15250	+	0.175315	0.863306	0	0	1	4.92432	0	0
CC_0013	15201	15300	+	0.175315	0	0	0	1	0	0	0
CC_0013	15251	15350	+	1.05189	2.37409	2.00263	6.17551	1	2.25698	1.90384	5.87088
CC_0013	15301	15400	+	1.57783	2.80574	5.34035	23.7371	1	1.77823	3.38461	15.0441
CC_0013	15351	15450	+	0.701259	1.07913	3.33772	17.7546	1	1.53885	4.75961	25.3182
CC_0013	15401	15500	+	0.701259	1.07913	3.33772	17.9476	1	1.53885	4.75961	25.5934
CC_0013	15451	15550	+	0	0.647479	0.667544	2.31582	#DIV/0!	#DIV/0!	#DIV/0!	#DIV/0!
CC_0013	15501	15600	+	0	0	3.33772	5.0176	#DIV/0!	#DIV/0!	#DIV/0!	#DIV/0!
CC_0013	15551	15650	+	0	0.431653	4.33903	4.82462	#DIV/0!	#DIV/0!	#DIV/0!	#DIV/0!
CC_0013	15601	15700	+	0.175315	1.51079	4.00526	2.89477	1	8.61756	22.8461	16.5119
CC_0013	15651	15750	+	0.175315	1.51079	1.33509	0	1	8.61756	7.61538	0
CC_0013	15701	15800	+	0.175315	1.07913	0.333772	3.66671	1	6.1554	1.90384	20.915
CC_0013	15751	15850	+	3.68161	0	2.00263	3.66671	1	0	0.543955	0.995954
CC_0013	15801	15900	+	3.68161	0	2.83706	3.66671	1	0	0.770604	0.995954
CC_0013	15851	15950	+	4.03224	0	2.83706	0	1	0	0.703595	0
CC_0013	15901	16000	+	0.350629	0	0.83443	0	1	0	2.3798	0
CC_0013	15951	16050	+	0.350629	0	0	0	1	0	0	0
CC_0013	16001	16100	+	0.701259	0.431653	0	0	1	0.61554	0	0
CC_0013	16051	16150	+	1.2272	0.431653	0	0	1	0.351737	0	0
CC_0013	16101	16200	+	1.2272	0.431653	0	0	1	0.351737	0	0
CC_0013	16151	16250	+	0.876573	0	0	0	1	0	0	0
CC_0013	16201	16300	+	0.350629	0	0	0	1	0	0	0
CC_0013	16251	16350	+	1.05189	0	0	0.192985	1	0	0	0.183465
CC_0013	16301	16400	+	0.701259	0	0	0.192985	1	0	0	0.275198
CC_0013	16351	16450	+	0.701259	0	0	0.192985	1	0	0	0.275198
CC_0013	16401	16500	+	0.350629	0	0	0	1	0	0	0
CC_0013	16451	16550	+	0.350629	0	0	0	1	0	0	0
CC_0013	16501	16600	+	0.350629	0	0	0	1	0	0	0
CC_0013	16551	16650	+	0	0	0	0	#DIV/0!	#DIV/0!	#DIV/0!	#DIV/0!
CC_0013	16601	16700	+	0	0	0	0	#DIV/0!	#DIV/0!	#DIV/0!	#DIV/0!
CC_0013	16651	16750	+	0	0	0.166886	0	#DIV/0!	#DIV/0!	#DIV/0!	#DIV/0!
CC_0013	16701	16800	+	0	0	0.166886	0	#DIV/0!	#DIV/0!	#DIV/0!	#DIV/0!
CC_0013	16751	16850	+	0	0	0.667544	0	#DIV/0!	#DIV/0!	#DIV/0!	#DIV/0!
CC_0013	16801	16900	+	0	0	0.500658	0	#DIV/0!	#DIV/0!	#DIV/0!	#DIV/0!
CC_0013	16851	16950	+	0	0	0.500658	0	#DIV/0!	#DIV/0!	#DIV/0!	#DIV/0!
CC_0013	16901	17000	+	0.701259	0	25.3667	0	1	0	36.173	0
CC_0013	16951	17050	+	1.05189	0	50.3995	0	1	0	47.9134	0
CC_0013	17001	17100	+	12.6227	6.69062	60.4127	9.84222	1	0.530048	4.78605	0.779727
moaC	17051	17150	-	20.5118	19.2086	45.393	28.7547	1	0.936463	2.21302	1.40186
moaC	17101	17200	-	20.1612	19.2086	20.6939	28.7547	1	0.952749	1.02642	1.42624
moaC	17151	17250	-	8.59042	12.5179	10.8476	18.9125	1	1.4572	1.26275	2.20158
moaC	17201	17300	-	0	0	0.500658	0	#DIV/0!	#DIV/0!	#DIV/0!	#DIV/0!
moaC	17251	17350	-	0	0.215826	0.166886	0	#DIV/0!	#DIV/0!	#DIV/0!	#DIV/0!
moaC	17301	17400	-	0	0.215826	0	0	#DIV/0!	#DIV/0!	#DIV/0!	#DIV/0!
moaC	17351	17450	-	0	0.215826	0	0	#DIV/0!	#DIV/0!	#DIV/0!	#DIV/0!
moaC	17401	17500	-	0	0	0	0	#DIV/0!	#DIV/0!	#DIV/0!	#DIV/0!
moaC	17451	17550	-	0	1.51079	0	0	#DIV/0!	#DIV/0!	#DIV/0!	#DIV/0!
moaB	17501	17600	-	0	1.51079	0	0	#DIV/0!	#DIV/0!	#DIV/0!	#DIV/0!
moaB	17551	17650	-	5.43476	1.29496	2.16952	0	1	0.238274	0.399193	0
moaB	17601	17700	-	12.272	2.58992	3.83838	0.38597	1	0.211042	0.312774	0.0314512
moaB	17651	17750	-	12.6227	2.58992	3.83838	0.38597	1	0.20518	0.304086	0.0305775
moaB	17701	17800	-	7.1879	1.29496	1.66886	0.38597	1	0.180158	0.232176	0.0536971
moaB	17751	17850	-	0.350629	0	0	0	1	0	0	0
moaB	17801	17900	-	1.05189	0.215826	1.66886	0	1	0.20518	1.58654	0
moaB	17851	17950	-	2.80503	1.29496	5.17346	0	1	0.461655	1.84435	0
moaB	17901	18000	-	3.50629	1.72661	5.17346	0	1	0.492432	1.47548	0
moaB	17951	18050	-	23.6675	1.51079	4.17215	0	1	0.0638338	0.176282	0
moaB	18001	18100	-	37.6927	2.37409	1.33509	0	1	0.0629855	0.0354204	0
moaE	18051	18150	-	63.8145	11.0071	4.00526	2.5088	1	0.172487	0.0627641	0.039314
moaE	18101	18200	-	65.0417	15.5395	7.67675	4.24566	1	0.238916	0.118028	0.065276
moaE	18151	18250	-	49.2634	13.5971	7.00921	4.24566	1	0.276007	0.14228	0.0861829
moaE	18201	18300	-	23.4922	4.96401	4.50592	1.73686	1	0.211305	0.191805	0.0739337
moaE	18251	18350	-	1.2272	2.58992	0.333772	0	1	2.11042	0.271978	0
moaE	18301	18400	-	1.2272	3.02157	0.333772	0	1	2.46216	0.271978	0
moaE	18351	18450	-	0.175315	2.58992	0.166886	0	1	14.773	0.951922	0
moaE	18401	18500	-	0.175315	0.431653	0	0	1	2.46216	0	0
moaE	18451	18550	-	0.175315	0	0	0	1	0	0	0
moaD	18501	18600	-	0.701259	0.215826	0	0.192985	1	0.30777	0	0.275198
moaD	18551	18650	-	0.525944	0.215826	0	0.192985	1	0.41036	0	0.36693
moaD	18601	18700	-	0.525944	0.215826	0	0.192985	1	0.41036	0	0.36693
moaD	18651	18750	-	0	0	0	0	#DIV/0!	#DIV/0!	#DIV/0!	#DIV/0!
moaD	18701	18800	-	0	0	0	0	#DIV/0!	#DIV/0!	#DIV/0!	#DIV/0!
moaA	18751	18850	-	0	0	0	0	#DIV/0!	#DIV/0!	#DIV/0!	#DIV/0!
moaA	18801	18900	-	0	0	0	0	#DIV/0!	#DIV/0!	#DIV/0!	#DIV/0!
moaA	18851	18950	-	0	0	0	0	#DIV/0!	#DIV/0!	#DIV/0!	#DIV/0!
moaA	18901	19000	-	20.3365	54.1724	25.0329	9.64924	1	2.6638	1.23093	0.474479
moaA	18951	19050	-	29.8035	78.9925	55.2392	19.8774	1	2.65044	1.85345	0.66695
moaA	19001	19100	-	36.6408	84.3881	56.9081	19.8774	1	2.30312	1.55314	0.542495
moaA	19051	19150	-	22.265	30.6474	31.8752	10.2282	1	1.37648	1.43163	0.459385
moaA	19101	19200	-	15.0771	5.82731	1.66886	0	1	0.386502	0.110689	0
moaA	19151	19250	-	8.23979	0.431653	0	0	1	0.0523864	0	0
moaA	19201	19300	-	2.27909	0	0	0	1	0	0	0
moaA	19251	19350	-	1.92846	0	0.83443	0	1	0	0.432692	0
moaA	19301	19400	-	4.7335	4.53235	2.67017	0.38597	1	0.957507	0.564102	0.0815401
moaA	19351	19450	-	5.9607	7.98558	3.33772	2.70179	1	1.3397	0.559954	0.453267
moaA	19401	19500	-	4.03224	8.41723	2.50329	2.70179	1	2.08748	0.620819	0.670047
moaA	19451	19550	-	1.57783	3.88488	0.667544	2.31582	1	2.46216	0.423076	1.46772
moaA	19501	19600	-	0.701259	12.7338	2.00263	0	1	18.1584	2.85577	0
moaA	19551	19650	-	11.7461	27.41	8.01052	1.92985	1	2.33354	0.681974	0.164297
moaA	19601	19700	-	16.1289	29.9999	8.84495	4.24566	1	1.86	0.54839	0.263233
moaA	19651	19750	-	30.3294	28.2733	21.8621	28.1758	1	0.932205	0.72082	0.928991
moaA	19701	19800	-	35.5889	22.2301	27.5362	46.5093	1	0.624637	0.77373	1.30685
moaA	19751	19850	-	39.9718	20.0719	27.3693	45.7374	1	0.502151	0.684716	1.14424
CC_0019	19801	19900	+	25.4206	9.49636	12.3496	21.8073	1	0.373569	0.485808	0.857858
CC_0019	19851	19950	+	9.11636	0.431653	0.667544	1.54388	1	0.0473492	0.0732248	0.169352
CC_0019	19901	20000	+	0	0.215826	0	0	#DIV/0!	#DIV/0!	#DIV/0!	#DIV/0!
CC_0019	19951	20050	+	0.876573	0.215826	3.33772	0	1	0.246216	3.80769	0
CC_0019	20001	20100	+	2.98035	0.863306	4.67281	0	1	0.289666	1.56787	0
CC_0019	20051	20150	+	2.98035	0.863306	4.67281	0	1	0.289666	1.56787	0
CC_0019	20101	20200	+	10.5189	18.3452	30.0395	28.1758	1	1.74403	2.85577	2.67859
CC_0019	20151	20250	+	16.1289	36.9063	68.757	74.1062	1	2.2882	4.26296	4.59461
CC_0019	20201	20300	+	19.4599	36.9063	69.5914	74.2991	1	1.89653	3.57614	3.81806
CC_0019	20251	20350	+	11.9214	19.4244	42.2221	46.1234	1	1.62937	3.54171	3.86896
CC_0019	20301	20400	+	5.08413	18.7769	4.33903	0.192985	1	3.69324	0.853447	0.0379583
CC_0019	20351	20450	+	2.45441	34.9639	5.34035	0.192985	1	14.2454	2.17582	0.0786279
CC_0019	20401	20500	+	1.57783	34.9639	4.00526	0.192985	1	22.1594	2.53846	0.12231
CC_0020	20451	20550	-	3.15566	19.4244	3.83838	0.771939	1	6.1554	1.21634	0.24462
CC_0020	20501	20600	-	16.8302	4.96401	8.51118	0.771939	1	0.294946	0.505709	0.0458663
CC_0020	20551	20650	-	31.732	6.04314	13.0171	0.771939	1	0.190443	0.410221	0.0243269
CC_0020	20601	20700	-	29.2776	3.02157	11.0145	0.192985	1	0.103204	0.376209	0.00659156
CC_0020	20651	20750	-	15.603	16.187	12.5164	4.24566	1	1.03743	0.802181	0.272106
	20701	20800		7.88916	26.5466	21.3614	9.45625	1	3.36495	2.70769	1.19864
CC_0021	20751	20850	-	12.272	26.5466	21.6952	9.45625	1	2.16318	1.76786	0.770553
CC_0021	20801	20900	-	11.5708	11.4388	13.6846	5.21059	1	0.988595	1.18269	0.450323
CC_0021	20851	20950	-	5.25944	0.863306	2.00263	0	1	0.164144	0.380769	0
CC_0021	20901	21000	-	1.40252	1.29496	2.00263	0	1	0.92331	1.42788	0
CC_0021	20951	21050	-	5.08413	6.69062	4.50592	74.8781	1	1.31598	0.886272	14.7278
CC_0021	21001	21100	-	5.25944	14.892	6.50855	166.546	1	2.83148	1.2375	31.6661
CC_0021	21051	21150	-	4.7335	14.4604	6.17478	166.546	1	3.0549	1.30449	35.1845
CC_0021	21101	21200	-	1.05189	9.06471	3.67149	91.6678	1	8.61756	3.49038	87.1459
CC_0021	21151	21250	-	0	1.51079	0	0	#DIV/0!	#DIV/0!	#DIV/0!	#DIV/0!
CC_0021	21201	21300	-	0.350629	1.72661	1.50197	0.192985	1	4.92432	4.28365	0.550395
CC_0021	21251	21350	-	5.61007	5.61149	5.34035	0.192985	1	1.00025	0.951922	0.0343997
CC_0021	21301	21400	-	8.23979	13.5971	7.00921	0.192985	1	1.65017	0.850654	0.0234211
CC_0021	21351	21450	-	7.88916	12.9496	6.00789	0	1	1.64144	0.761538	0
CC_0021	21401	21500	-	5.61007	9.92802	3.00395	0	1	1.76968	0.535456	0
CC_0021	21451	21550	-	7.1879	0.431653	2.16952	0	1	0.0600527	0.301829	0
CC_0021	21501	21600	-	10.6942	0.215826	3.83838	3.08776	1	0.0201816	0.358921	0.288732
CC_0021	21551	21650	-	9.64231	0.215826	5.84101	26.0529	1	0.0223833	0.605769	2.70194
CC_0021	21601	21700	-	5.61007	0.647479	7.50987	48.6322	1	0.115414	1.33864	8.66873
CC_0021	21651	21750	-	16.3043	0.647479	12.5164	56.7375	1	0.0397123	0.767679	3.47992
CC_0021	21701	21800	-	31.9073	1.07913	16.3548	41.6847	1	0.0338209	0.512573	1.30643
CC_0021	21751	21850	-	31.732	0.647479	14.0184	19.2985	1	0.0204046	0.441776	0.608172
CC_0021	21801	21900	-	17.5315	0.647479	7.00921	8.10536	1	0.0369324	0.399807	0.462332
CC_0021	21851	21950	-	5.78538	11.0071	11.0145	1.35089	1	1.90258	1.90384	0.233501
CC_0021	21901	22000	-	7.1879	17.6978	11.0145	1.54388	1	2.46216	1.53236	0.214788
CC_0021	21951	22050	-	14.5511	19.2086	22.8634	1.73686	1	1.32007	1.57124	0.119363
CC_0021	22001	22100	-	8.76573	8.63306	12.1827	0.578954	1	0.984864	1.38981	0.0660474
CC_0021	22051	22150	-	0.701259	0.647479	0.333772	0	1	0.92331	0.475961	0
CC_0021	22101	22200	-	14.7264	9.06471	12.0158	3.8597	1	0.61554	0.815933	0.262093
CC_0021	22151	22250	-	20.8624	15.9712	23.0303	5.78954	1	0.765546	1.10391	0.27751
CC_0021	22201	22300	-	20.3365	16.187	23.0303	5.78954	1	0.795957	1.13246	0.284687
CC_0021	22251	22350	-	9.64231	16.187	42.0552	2.31582	1	1.67875	4.36153	0.240173
CC_0021	22301	22400	-	8.76573	16.187	69.0908	0.38597	1	1.84662	7.88191	0.0440316
CC_0021	22351	22450	-	8.76573	15.7553	69.0908	0.38597	1	1.79738	7.88191	0.0440316
CC_0021	22401	22500	-	11.2201	25.6833	48.7307	18.7195	1	2.28904	4.34314	1.66839
CC_0021	22451	22550	-	9.29168	39.2804	18.6912	34.3513	1	4.22748	2.01161	3.697
CC_0021	22501	22600	-	9.29168	39.4962	18.6912	34.3513	1	4.25071	2.01161	3.697
CC_0021	22551	22650	-	7.01259	23.5251	28.3706	16.5967	1	3.35469	4.04567	2.3667
CC_0021	22601	22700	-	12.272	4.74818	42.8897	2.70179	1	0.386911	3.49491	0.220158
CC_0021	22651	22750	-	15.4277	4.74818	46.5612	2.89477	1	0.30777	3.01803	0.187635
CC_0021	22701	22800	-	11.9214	2.80574	26.2011	1.92985	1	0.235354	2.19782	0.161881
CC_0021	22751	22850	-	3.50629	0.647479	3.67149	0.192985	1	0.184662	1.04711	0.0550395
CC_0021	22801	22900	-	0.350629	0.647479	0	0	1	1.84662	0	0
CC_0021	22851	22950	-	2.62972	1.94244	0.83443	4.24566	1	0.738648	0.317307	1.61449
CC_0021	22901	23000	-	3.50629	3.02157	3.00395	13.8949	1	0.861756	0.85673	3.96285
CC_0021	22951	23050	-	4.03224	2.80574	3.00395	14.0879	1	0.695828	0.744982	3.49381
CC_0021	23001	23100	-	1.92846	4.31653	3.83838	9.84222	1	2.23833	1.99038	5.10367
CC_0022	23051	23150	-	1.40252	6.90645	4.67281	0.38597	1	4.92432	3.33173	0.275198
CC_0022	23101	23200	-	4.90881	20.7193	38.5506	12.93	1	4.22085	7.85336	2.63404
CC_0022	23151	23250	-	4.55818	17.9136	37.7162	14.0879	1	3.92999	8.2744	3.09068
CC_0022	23201	23300	-	7.36322	19.4244	74.7649	26.8249	1	2.63803	10.1538	3.64309
CC_0022	23251	23350	-	4.38287	8.63306	41.2208	14.4739	1	1.96973	9.40499	3.30237
CC_0022	23301	23400	-	7.1879	10.3597	75.7662	15.2458	1	1.44126	10.5408	2.12104
CC_0022	23351	23450	-	10.8695	7.98558	71.7609	3.8597	1	0.734677	6.60204	0.355094
CC_0022	23401	23500	-	11.9214	4.96401	71.2603	3.47373	1	0.416395	5.97751	0.291386
CC_0022	23451	23550	-	11.3955	3.02157	37.0487	1.54388	1	0.265156	3.25118	0.135482
CC_0022	23501	23600	-	6.66196	3.45322	8.3443	0	1	0.51835	1.25253	0
CC_0022	23551	23650	-	6.48664	3.88488	15.1866	0	1	0.598904	2.34121	0
CC_0023	23601	23700	+	9.46699	3.66905	20.0263	16.0177	1	0.387562	2.11538	1.69196
CC_0023	23651	23750	+	14.2005	3.45322	17.1892	38.211	1	0.243176	1.21047	2.69082
CC_0023	23701	23800	+	15.4277	4.31653	11.5151	42.8426	1	0.279791	0.746393	2.77699
CC_0023	23751	23850	+	14.5511	5.82731	16.6886	29.3337	1	0.400472	1.14689	2.01591
CC_0023	23801	23900	+	15.603	3.45322	23.8647	9.26327	1	0.221318	1.52949	0.593685
CC_0023	23851	23950	+	13.3239	9.92802	26.2011	6.75447	1	0.745128	1.96647	0.506943
CC_0023	23901	24000	+	14.2005	23.0934	23.364	11.7721	1	1.62624	1.6453	0.828991
CC_0023	23951	24050	+	8.94105	25.8992	23.1971	16.5967	1	2.89666	2.59445	1.85624
CC_0023	24001	24100	+	9.11636	20.5035	34.7123	21.6143	1	2.24909	3.80769	2.37093
CC_0023	24051	24150	+	2.45441	3.88488	22.8634	14.0879	1	1.58282	9.31524	5.73984
CC_0024	24101	24200	+	14.0252	8.84888	21.3614	28.3688	1	0.630929	1.52308	2.0227
CC_0024	24151	24250	+	22.6156	14.6762	9.67938	33.7723	1	0.648942	0.427996	1.49332
CC_0024	24201	24300	+	22.6156	14.6762	9.67938	33.7723	1	0.648942	0.427996	1.49332
CC_0024	24251	24350	+	10.5189	11.223	5.84101	14.8598	1	1.06694	0.555288	1.41268
CC_0024	24301	24400	+	1.2272	4.74818	3.67149	4.43865	1	3.86911	2.99175	3.61688
CC_0024	24351	24450	+	1.2272	4.74818	3.67149	4.43865	1	3.86911	2.99175	3.61688
CC_0024	24401	24500	+	0.350629	1.72661	1.50197	2.12283	1	4.92432	4.28365	6.05435
CC_0024	24451	24550	+	0	0	0	0	#DIV/0!	#DIV/0!	#DIV/0!	#DIV/0!
CC_0024	24501	24600	+	0	0	0	0	#DIV/0!	#DIV/0!	#DIV/0!	#DIV/0!
CC_0024	24551	24650	+	0	0	0.166886	0	#DIV/0!	#DIV/0!	#DIV/0!	#DIV/0!
CC_0024	24601	24700	+	0	0	0.166886	0	#DIV/0!	#DIV/0!	#DIV/0!	#DIV/0!
CC_0024	24651	24750	+	0	0	0.166886	0	#DIV/0!	#DIV/0!	#DIV/0!	#DIV/0!
CC_0024	24701	24800	+	0	0	0	0	#DIV/0!	#DIV/0!	#DIV/0!	#DIV/0!
CC_0024	24751	24850	+	0	0	0	0	#DIV/0!	#DIV/0!	#DIV/0!	#DIV/0!
CC_0024	24801	24900	+	0	0	0.166886	0	#DIV/0!	#DIV/0!	#DIV/0!	#DIV/0!
CC_0024	24851	24950	+	5.61007	17.4819	0.500658	0.38597	1	3.11617	0.0892427	0.0687994
CC_0024	24901	25000	+	10.3436	37.338	1.50197	0.38597	1	3.60978	0.145208	0.0373149
CC_0024	24951	25050	+	20.8624	45.7552	16.021	35.5092	1	2.19318	0.767937	1.70206
CC_0025	25001	25100	-	26.1219	33.2373	34.0447	71.0184	1	1.27239	1.3033	2.71873
CC_0025	25051	25150	-	27.3491	65.6112	40.7202	92.8257	1	2.39903	1.4889	3.3941
CC_0025	25101	25200	-	26.4725	121.51	33.0434	81.0536	1	4.59005	1.24822	3.0618
CC_0025	25151	25250	-	15.603	116.762	14.686	45.1584	1	7.48331	0.941226	2.89421
CC_0025	25201	25300	-	10.3436	64.7479	7.00921	23.3512	1	6.25973	0.677639	2.25755
CC_0025	25251	25350	-	0.701259	0.431653	0	0	1	0.61554	0	0
CC_0025	25301	25400	-	0.701259	0.431653	0	0	1	0.61554	0	0
CC_0025	25351	25450	-	4.03224	1.07913	3.67149	3.8597	1	0.267626	0.910534	0.957209
CC_0025	25401	25500	-	10.8695	4.1007	16.5217	8.68431	1	0.377267	1.52	0.798961
CC_0025	25451	25550	-	10.8695	3.88488	30.8739	8.68431	1	0.35741	2.84041	0.798961
CC_0025	25501	25600	-	6.83727	3.02157	27.2024	5.0176	1	0.441926	3.97855	0.733861
CC_0025	25551	25650	-	0	14.6762	21.5283	3.08776	#DIV/0!	#DIV/0!	#DIV/0!	#DIV/0!
CC_0025	25601	25700	-	0.175315	32.8056	13.8515	5.78954	1	187.124	79.0095	33.0237
CC_0025	25651	25750	-	12.272	45.1077	23.1971	53.2638	1	3.67565	1.89025	4.34026
CC_0025	25701	25800	-	25.2453	52.23	23.364	146.668	1	2.0689	0.92548	5.80973
CC_0025	25751	25850	-	27.1738	32.5898	16.3548	108.264	1	1.19931	0.60186	3.98415
CC_0025	25801	25900	-	19.6352	26.5466	12.3496	106.721	1	1.35199	0.628948	5.43515
CC_0025	25851	25950	-	6.66196	6.04314	5.67412	10.6142	1	0.907112	0.85172	1.59325
CC_0025	25901	26000	-	1.75315	3.45322	2.3364	0.771939	1	1.96973	1.33269	0.440316
CC_0025	25951	26050	-	0	1.29496	0.500658	0	#DIV/0!	#DIV/0!	#DIV/0!	#DIV/0!
CC_0025	26001	26100	-	2.98035	3.2374	13.8515	26.4389	1	1.08625	4.64762	8.87108
CC_0025	26051	26150	-	7.36322	6.47479	31.7083	62.913	1	0.879343	4.30631	8.54423
CC_0025	26101	26200	-	18.408	29.5682	40.887	75.65	1	1.60627	2.22115	4.10962
CC_0025	26151	26250	-	29.2776	47.9135	36.0474	63.878	1	1.63653	1.23123	2.18181
CC_0025	26201	26300	-	34.3617	48.9926	22.8634	28.3688	1	1.42579	0.665374	0.825593
CC_0025	26251	26350	-	29.1022	31.9423	15.8542	16.4037	1	1.09759	0.544775	0.563658
CC_0025	26301	26400	-	15.2524	10.3597	6.84232	1.73686	1	0.679217	0.448607	0.113875
CC_0025	26351	26450	-	7.1879	12.3021	6.50855	0.964924	1	1.7115	0.905487	0.134243
CC_0025	26401	26500	-	2.10378	11.223	8.3443	0.192985	1	5.33468	3.96634	0.0917326
CC_0025	26451	26550	-	4.7335	13.1654	18.6912	0.192985	1	2.78133	3.94871	0.04077
CC_0025	26501	26600	-	5.9607	9.28054	19.5256	0	1	1.55695	3.27573	0
CC_0025	26551	26650	-	5.43476	4.31653	15.8542	0	1	0.794245	2.91718	0
CC_0025	26601	26700	-	9.11636	2.37409	6.34166	0	1	0.260421	0.695635	0
CC_0026	26651	26750	-	9.46699	0	1.1682	0	1	0	0.123397	0
CC_0026	26701	26800	-	9.29168	0	1.66886	0	1	0	0.179608	0
CC_0026	26751	26850	-	3.50629	0	1.00132	0	1	0	0.285577	0
CC_0026	26801	26900	-	0.525944	1.07913	1.00132	0	1	2.0518	1.90384	0
CC_0026	26851	26950	-	2.10378	4.74818	0.166886	0	1	2.25698	0.0793268	0
CC_0026	26901	27000	-	1.57783	5.17983	0	0	1	3.28288	0	0
CC_0026	26951	27050	-	1.75315	4.1007	0	0	1	2.33905	0	0
CC_0026	27001	27100	-	0.350629	0.863306	0	0	1	2.46216	0	0
CC_0026	27051	27150	-	0.350629	0.431653	0.166886	0	1	1.23108	0.475961	0
CC_0026	27101	27200	-	0.175315	0.431653	0.166886	0	1	2.46216	0.951922	0
CC_0026	27151	27250	-	0	0	0.166886	0	#DIV/0!	#DIV/0!	#DIV/0!	#DIV/0!
CC_0026	27201	27300	-	0	0	0	0	#DIV/0!	#DIV/0!	#DIV/0!	#DIV/0!
CC_0026	27251	27350	-	6.31133	1.72661	4.17215	1.54388	1	0.273573	0.661057	0.24462
CC_0026	27301	27400	-	9.29168	1.94244	4.83969	2.70179	1	0.209051	0.520863	0.290775
CC_0026	27351	27450	-	9.29168	2.15826	4.33903	2.70179	1	0.232279	0.466981	0.290775
CC_0026	27401	27500	-	2.98035	0.431653	0.667544	1.15791	1	0.144833	0.223982	0.388514
CC_0026	27451	27550	-	0	0.431653	0.166886	0.192985	#DIV/0!	#DIV/0!	#DIV/0!	#DIV/0!
CC_0026	27501	27600	-	6.31133	0.863306	5.17346	24.1231	1	0.136787	0.819711	3.82219
CC_0026	27551	27650	-	11.5708	2.37409	8.51118	49.5971	1	0.20518	0.735576	4.28641
CC_0026	27601	27700	-	11.0448	2.15826	4.83969	59.4393	1	0.19541	0.438186	5.38164
CC_0026	27651	27750	-	7.88916	1.51079	4.00526	39.5619	1	0.191501	0.507692	5.01471
CC_0026	27701	27800	-	4.7335	4.53235	12.8502	17.9476	1	0.957507	2.71474	3.79161
CC_0026	27751	27850	-	7.88916	14.2445	36.548	13.8949	1	1.80558	4.63269	1.76127
CC_0026	27801	27900	-	7.53853	12.9496	30.8739	28.9477	1	1.71779	4.09548	3.83997
CC_0026	27851	27950	-	7.53853	12.9496	30.5401	28.9477	1	1.71779	4.0512	3.83997
CC_0026	27901	28000	-	1.92846	3.88488	6.34166	18.9125	1	2.01449	3.28846	9.80705
CC_0026	27951	28050	-	0.525944	0.647479	1.00132	3.47373	1	1.23108	1.90384	6.60474
CC_0026	28001	28100	-	3.33098	11.223	4.33903	7.91238	1	3.36927	1.30263	2.37539
CC_0026	28051	28150	-	9.29168	26.9783	7.00921	9.64924	1	2.90349	0.754353	1.03848
CC_0026	28101	28200	-	12.272	27.1941	6.34166	8.10536	1	2.21594	0.516758	0.660474
CC_0026	28151	28250	-	42.6015	49.6401	63.0829	23.3512	1	1.16522	1.48077	0.54813
CC_0026	28201	28300	-	62.5873	65.6112	117.988	45.7374	1	1.04831	1.88518	0.730777
CC_0026	28251	28350	-	62.5873	70.1436	123.162	43.8075	1	1.12073	1.96784	0.699943
CC_0026	28301	28400	-	36.2901	42.0862	68.2563	24.1231	1	1.15971	1.88085	0.664729
CC_0026	28351	28450	-	10.1683	9.71219	10.5138	0	1	0.955148	1.03398	0
CC_0026	28401	28500	-	7.88916	5.39566	7.67675	0.192985	1	0.683933	0.973076	0.024462
CC_0026	28451	28550	-	7.36322	4.74818	7.00921	2.5088	1	0.644852	0.951922	0.340721
CC_0026	28501	28600	-	14.9017	6.90645	12.1827	5.0176	1	0.463465	0.817533	0.336712
CC_0026	28551	28650	-	13.8499	6.47479	9.67938	4.82462	1	0.467499	0.698879	0.348352
CC_0026	28601	28700	-	8.06447	4.53235	11.0145	22.3862	1	0.562015	1.3658	2.77591
CC_0026	28651	28750	-	2.10378	6.04314	9.84627	52.1059	1	2.87252	4.68028	24.7678
CC_0026	28701	28800	-	2.80503	6.04314	9.84627	54.2287	1	2.15439	3.51021	19.3326
CC_0026	28751	28850	-	2.27909	3.66905	4.00526	34.3513	1	1.60987	1.75739	15.0724
CC_0026	28801	28900	-	1.57783	1.72661	12.3496	5.0176	1	1.09429	7.82691	3.18006
CC_0026	28851	28950	-	2.45441	2.15826	23.6978	5.21059	1	0.879343	9.65521	2.12295
CC_0026	28901	29000	-	31.5566	4.74818	56.5743	14.0879	1	0.150465	1.79279	0.446432
CC_0026	28951	29050	-	67.4962	5.39566	77.2682	21.4213	1	0.0799403	1.14478	0.317371
CC_0026	29001	29100	-	66.6196	4.96401	65.9199	19.2985	1	0.0745128	0.989498	0.289682
CC_0026	29051	29150	-	38.2186	4.53235	33.3772	13.3159	1	0.11859	0.873323	0.348415
CC_0026	29101	29200	-	1.57783	4.74818	0.500658	5.98253	1	3.00931	0.317307	3.79161
CC_0026	29151	29250	-	7.53853	13.5971	3.17083	8.8773	1	1.80368	0.420617	1.17759
CC_0026	29201	29300	-	342.916	867.191	486.305	242.775	1	2.52888	1.41815	0.707973
CC_0026	29251	29350	-	342.74	864.601	486.139	239.88	1	2.52261	1.41839	0.699889
CC_0026	29301	29400	-	342.916	856.615	483.969	236.792	1	2.49804	1.41134	0.690527
CC_0026	29351	29450	-	32.4332	30.6474	20.1932	5.78954	1	0.944937	0.622608	0.178507
CC_0026	29401	29500	-	46.1078	35.1797	33.8778	13.5089	1	0.762989	0.734754	0.292986
CC_0027	29451	29550	-	50.6659	35.1797	38.7175	18.5265	1	0.694346	0.764173	0.365661
CC_0027	29501	29600	-	25.07	5.39566	19.025	12.737	1	0.215224	0.758875	0.508057
CC_0027	29551	29650	-	11.7461	0.863306	5.34035	5.0176	1	0.0734973	0.454649	0.427173
CC_0027	29601	29700	-	0.350629	1.51079	0.166886	0	1	4.30878	0.475961	0
CC_0027	29651	29750	-	4.90881	28.9207	10.0132	0	1	5.8916	2.03983	0
CC_0027	29701	29800	-	14.3758	67.5537	23.1971	27.2109	1	4.69912	1.61362	1.89282
CC_0027	29751	29850	-	16.3043	83.0932	28.8713	66.0008	1	5.09641	1.77078	4.04807
CC_0027	29801	29900	-	11.7461	70.5752	19.1919	66.0008	1	6.00841	1.6339	5.61896
CC_0027	29851	29950	-	1.92846	31.5107	6.00789	38.7899	1	16.3398	3.11538	20.1144
CC_0027	29901	30000	-	0	14.892	0.166886	0	#DIV/0!	#DIV/0!	#DIV/0!	#DIV/0!
CC_0027	29951	30050	-	0.701259	0.647479	0.166886	0	1	0.92331	0.237981	0
CC_0027	30001	30100	-	0.701259	0.863306	0.166886	0.38597	1	1.23108	0.237981	0.550395
CC_0027	30051	30150	-	0.701259	0.863306	0.500658	0.38597	1	1.23108	0.713942	0.550395
CC_0027	30101	30200	-	2.27909	0.215826	0.83443	0.38597	1	0.0946985	0.366124	0.169352
CC_0027	30151	30250	-	5.78538	0.215826	1.00132	0	1	0.0373055	0.173077	0
	30201	30300		33.6604	10.1438	8.3443	40.9128	1	0.301358	0.247896	1.21546
CC_0028	30251	30350	-	59.7823	23.0934	18.1906	93.4046	1	0.386292	0.30428	1.56241
CC_0028	30301	30400	-	71.879	26.5466	40.3864	101.317	1	0.369324	0.561866	1.40955
CC_0028	30351	30450	-	61.1848	23.0934	57.2419	70.6324	1	0.377437	0.935557	1.15441
CC_0028	30401	30500	-	37.1667	15.7553	53.0697	19.6844	1	0.42391	1.42788	0.529626
CC_0028	30451	30550	-	28.2257	13.8129	42.0552	30.4916	1	0.489373	1.48996	1.08028
CC_0028	30501	30600	-	16.6549	9.28054	27.7031	46.5093	1	0.557226	1.66336	2.79253
CC_0028	30551	30650	-	19.8106	5.61149	36.0474	56.9305	1	0.283257	1.8196	2.87375
CC_0028	30601	30700	-	68.0221	29.5682	63.5835	42.2637	1	0.434686	0.934748	0.621323
CC_0028	30651	30750	-	107.468	44.2444	102.635	20.0704	1	0.411699	0.955028	0.186757
CC_0028	30701	30800	-	115.532	43.3811	89.7846	13.7019	1	0.375489	0.777138	0.118598
CC_0028	30751	30850	-	79.2422	18.5611	51.7346	21.2283	1	0.234232	0.652867	0.267892
CC_0028	30801	30900	-	34.1864	2.15826	2.50329	17.1756	1	0.0631323	0.0732248	0.502412
CC_0028	30851	30950	-	18.5834	1.07913	0.83443	11.5791	1	0.0580698	0.044902	0.623089
CC_0028	30901	31000	-	25.5959	15.3237	18.0237	19.4915	1	0.598676	0.704162	0.761506
CC_0028	30951	31050	-	50.3153	29.9999	42.5559	40.1408	1	0.596237	0.845784	0.797786
CC_0028	31001	31100	-	62.412	34.3164	52.5691	44.1935	1	0.549836	0.842291	0.708093
CC_0028	31051	31150	-	41.1989	19.4244	35.3798	29.9126	1	0.471477	0.858755	0.726053
CC_0028	31101	31200	-	16.6549	4.74818	11.1814	17.7546	1	0.285092	0.671356	1.06603
CC_0028	31151	31250	-	8.41511	0.647479	2.50329	17.1756	1	0.0769425	0.297476	2.04105
CC_0028	31201	31300	-	10.8695	6.69062	8.17741	23.1582	1	0.61554	0.752325	2.13056
CC_0028	31251	31350	-	13.3239	8.84888	11.0145	21.8073	1	0.664135	0.826669	1.6367
CC_0028	31301	31400	-	16.4796	20.2877	12.6833	28.5617	1	1.23108	0.769639	1.73316
CC_0028	31351	31450	-	15.2524	24.6042	9.67938	25.667	1	1.61314	0.634615	1.68282
CC_0028	31401	31500	-	12.6227	22.4459	6.50855	18.5265	1	1.77823	0.515624	1.46772
CC_0028	31451	31550	-	6.13601	10.7913	3.5046	8.29835	1	1.75869	0.571153	1.3524
CC_0028	31501	31600	-	6.13601	2.58992	12.8502	2.70179	1	0.422085	2.09423	0.440316
CC_0028	31551	31650	-	17.5315	3.02157	28.8713	7.91238	1	0.172351	1.64683	0.451324
CC_0028	31601	31700	-	24.7194	5.39566	39.2182	7.91238	1	0.218277	1.58654	0.320088
CC_0028	31651	31750	-	19.6352	3.45322	28.7044	5.40357	1	0.175869	1.46188	0.275198
CC_0028	31701	31800	-	11.7461	15.5395	20.0263	1.54388	1	1.32295	1.70493	0.131438
CC_0028	31751	31850	-	18.0574	36.043	87.782	33.7723	1	1.99602	4.86127	1.87028
CC_0028	31801	31900	-	25.2453	44.2444	147.36	56.3516	1	1.75258	5.83713	2.23216
CC_0028	31851	31950	-	21.9143	31.7265	140.017	55.0007	1	1.44775	6.3893	2.5098
CC_0028	31901	32000	-	7.88916	8.84888	61.9147	22.7722	1	1.12165	7.84807	2.88652
CC_0028	31951	32050	-	9.99294	13.8129	12.0158	11.0001	1	1.38227	1.20243	1.10079
CC_0028	32001	32100	-	17.1808	25.0359	22.1958	22.0003	1	1.4572	1.29189	1.28051
CC_0028	32051	32150	-	25.2453	35.1797	42.5559	25.281	1	1.39351	1.6857	1.00141
CC_0028	32101	32200	-	20.8624	29.3524	45.393	16.7897	1	1.40695	2.17582	0.80478
CC_0028	32151	32250	-	13.6745	18.1294	49.5651	5.98253	1	1.32578	3.62463	0.437494
CC_0028	32201	32300	-	5.61007	7.98558	35.8805	3.8597	1	1.42344	6.39573	0.687994
CC_0028	32251	32350	-	0.175315	0.215826	21.0276	1.35089	1	1.23108	119.942	7.70553
CC_0028	32301	32400	-	0	2.37409	7.84364	1.15791	#DIV/0!	#DIV/0!	#DIV/0!	#DIV/0!
CC_0028	32351	32450	-	0.175315	3.02157	1.1682	0	1	17.2351	6.66345	0
CC_0028	32401	32500	-	0.701259	3.45322	1.1682	0	1	4.92432	1.66586	0
CC_0028	32451	32550	-	0.876573	1.51079	0	0	1	1.72351	0	0
CC_0028	32501	32600	-	7.36322	14.892	3.33772	2.12283	1	2.02249	0.453296	0.288302
CC_0028	32551	32650	-	28.2257	35.1797	14.8528	11.0001	1	1.24637	0.526218	0.389721
CC_0028	32601	32700	-	39.4458	37.338	25.8673	11.0001	1	0.946564	0.655768	0.278867
CC_0028	32651	32750	-	33.1345	24.6042	27.5362	8.8773	1	0.742556	0.831043	0.267917
CC_0028	32701	32800	-	12.6227	8.41723	20.0263	0	1	0.666835	1.58654	0
CC_0028	32751	32850	-	2.10378	10.5755	15.0197	0.192985	1	5.02691	7.13941	0.0917326
CC_0028	32801	32900	-	3.85692	15.5395	17.8568	0.192985	1	4.02899	4.6298	0.0500359
CC_0028	32851	32950	-	15.2524	19.2086	16.6886	0.38597	1	1.25938	1.09416	0.0253055
CC_0029	32901	33000	+	24.5441	20.9352	14.3522	0.192985	1	0.852963	0.584752	0.00786279
CC_0029	32951	33050	+	22.9662	25.4675	21.5283	0.192985	1	1.10891	0.937389	0.00840298
CC_0029	33001	33100	+	15.7783	30.2157	35.046	0.38597	1	1.91501	2.22115	0.024462
CC_0029	33051	33150	+	8.41511	25.8992	35.2129	6.75447	1	3.0777	4.18449	0.80266
CC_0029	33101	33200	+	8.59042	17.4819	23.8647	14.2809	1	2.03505	2.77806	1.66242
CC_0029	33151	33250	+	3.50629	4.53235	8.17741	13.8949	1	1.29263	2.33221	3.96285
CC_0029	33201	33300	+	8.59042	9.06471	12.6833	11.3861	1	1.05521	1.47645	1.32544
CC_0029	33251	33350	+	10.5189	16.187	16.021	7.14044	1	1.53885	1.52308	0.678821
CC_0029	33301	33400	+	10.6942	15.9712	15.3535	7.71939	1	1.49344	1.43569	0.72183
CC_0029	33351	33450	+	2.80503	9.49636	7.00921	4.24566	1	3.38547	2.4988	1.51359
CC_0029	33401	33500	+	0.175315	0	0	0.964924	1	0	0	5.50395
CC_0029	33451	33550	+	0	0	11.3482	0.38597	#DIV/0!	#DIV/0!	#DIV/0!	#DIV/0!
CC_0029	33501	33600	+	0	0	17.3561	0	#DIV/0!	#DIV/0!	#DIV/0!	#DIV/0!
CC_0030	33551	33650	+	0	0.215826	18.0237	15.2458	#DIV/0!	#DIV/0!	#DIV/0!	#DIV/0!
CC_0030	33601	33700	+	0	0.215826	7.34298	38.211	#DIV/0!	#DIV/0!	#DIV/0!	#DIV/0!
CC_0030	33651	33750	+	24.8947	7.55392	22.0289	23.3512	1	0.303435	0.884885	0.937998
CC_0030	33701	33800	+	59.607	13.8129	44.0579	23.5441	1	0.231733	0.739139	0.39499
CC_0030	33751	33850	+	59.607	13.8129	43.3903	0.578954	1	0.231733	0.72794	0.00971286
CC_0030	33801	33900	+	34.7123	6.25897	35.046	0.192985	1	0.18031	1.00961	0.00555955
CC_0030	33851	33950	+	0.175315	0.431653	24.6991	0	1	2.46216	140.884	0
CC_0030	33901	34000	+	8.94105	5.61149	27.7031	0.964924	1	0.627609	3.09841	0.107921
CC_0030	33951	34050	+	21.9143	9.28054	18.1906	1.35089	1	0.423492	0.830076	0.0616443
CC_0030	34001	34100	+	21.739	8.84888	6.50855	1.35089	1	0.407051	0.299395	0.0621414
CC_0030	34051	34150	+	12.9733	3.66905	3.5046	0.38597	1	0.282816	0.27014	0.0297511
CC_0030	34101	34200	+	0	0	0	0	#DIV/0!	#DIV/0!	#DIV/0!	#DIV/0!
CC_0030	34151	34250	+	0	0	0	0	#DIV/0!	#DIV/0!	#DIV/0!	#DIV/0!
CC_0030	34201	34300	+	0.175315	11.223	4.50592	67.3517	1	64.0162	25.7019	384.176
CC_0030	34251	34350	+	0.876573	25.8992	9.34561	149.563	1	29.5459	10.6615	170.623
CC_0030	34301	34400	+	2.27909	26.3308	12.6833	159.791	1	11.5532	5.56508	70.1119
vapC	34351	34450	-	4.03224	16.187	13.0171	104.791	1	4.01439	3.22826	25.9882
vapC	34401	34500	-	14.7264	11.0071	19.5256	24.5091	1	0.747442	1.32589	1.66429
vapC	34451	34550	-	24.8947	15.9712	36.0474	16.4037	1	0.641549	1.44799	0.658924
vapC	34501	34600	-	22.9662	15.1078	47.2287	4.05268	1	0.657829	2.05644	0.176463
vapC	34551	34650	-	13.4992	6.04314	38.3838	66.7727	1	0.447666	2.8434	4.94641
vapC	34601	34700	-	4.03224	1.72661	20.3601	148.019	1	0.428202	5.04933	36.709
vapC	34651	34750	-	4.03224	1.51079	4.33903	148.019	1	0.374677	1.07609	36.709
vapB	34701	34800	-	3.50629	19.856	7.50987	92.2467	1	5.66297	2.14182	26.3089
vapB	34751	34850	-	2.62972	41.2228	14.3522	15.2458	1	15.6758	5.45769	5.7975
vapB	34801	34900	-	2.98035	43.5969	21.6952	15.2458	1	14.6281	7.2794	5.11544
vapB	34851	34950	-	2.45441	24.82	19.6925	8.68431	1	10.1124	8.02334	3.53826
vapB	34901	35000	-	2.27909	2.37409	12.0158	3.8597	1	1.04168	5.27218	1.69352
	34951	35050		2.27909	0	1.83574	3.8597	1	0	0.805472	1.69352
	35001	35100		4.7335	6.25897	8.67807	1.54388	1	1.32227	1.83333	0.32616
	35051	35150		8.41511	20.2877	16.1879	0	1	2.41087	1.92368	0
	35101	35200		32.0826	30.6474	28.2037	7.91238	1	0.955264	0.879097	0.246625
	35151	35250		38.3939	26.7625	27.0355	9.64924	1	0.69705	0.704161	0.251322
	35201	35300		35.0629	15.5395	20.8607	10.4212	1	0.443189	0.594951	0.297214
	35251	35350		18.408	15.5395	25.0329	11.7721	1	0.844169	1.35989	0.639507
	35301	35400		12.798	31.9423	34.2116	23.1582	1	2.49589	2.67321	1.80952
	35351	35450		33.4851	71.0069	74.0973	44.5795	1	2.12055	2.21284	1.33132
	35401	35500		56.1007	115.467	113.316	56.1586	1	2.05821	2.01986	1.00103
	35451	35550		64.6911	103.597	108.476	44.5795	1	1.6014	1.67683	0.689113
	35501	35600		56.276	54.6041	72.4285	23.9301	1	0.970291	1.28702	0.425228
	35551	35650		34.011	21.151	25.5335	3.08776	1	0.621886	0.750743	0.0907869
	35601	35700		21.3884	14.2445	15.1866	1.73686	1	0.665994	0.71004	0.0812059
	35651	35750		7.53853	6.04314	12.0158	0.192985	1	0.801634	1.59392	0.0255998
	35701	35800		2.62972	7.76975	15.8542	0.578954	1	2.95459	6.02884	0.220158
CC_0034	35751	35850	-	4.38287	10.1438	17.1892	0.38597	1	2.31443	3.92192	0.0880633
CC_0034	35801	35900	-	3.68161	7.12227	11.5151	0.38597	1	1.93455	3.12774	0.104837
CC_0034	35851	35950	-	1.75315	2.80574	1.50197	0	1	1.6004	0.85673	0
CC_0034	35901	36000	-	0.175315	0.431653	0.166886	0	1	2.46216	0.951922	0
CC_0034	35951	36050	-	0.175315	0.431653	0.83443	1.15791	1	2.46216	4.75961	6.60474
CC_0034	36001	36100	-	0.350629	2.37409	2.67017	5.40357	1	6.77094	7.61538	15.4111
CC_0034	36051	36150	-	0.350629	2.37409	2.50329	5.40357	1	6.77094	7.13941	15.4111
CC_0034	36101	36200	-	0.350629	2.37409	1.83574	4.24566	1	6.77094	5.23557	12.1087
CC_0034	36151	36250	-	0.175315	0	0	0	1	0	0	0
CC_0034	36201	36300	-	0	0	0	0	#DIV/0!	#DIV/0!	#DIV/0!	#DIV/0!
CC_0034	36251	36350	-	0	0	0	0	#DIV/0!	#DIV/0!	#DIV/0!	#DIV/0!
CC_0034	36301	36400	-	0	0.431653	0	0	#DIV/0!	#DIV/0!	#DIV/0!	#DIV/0!
CC_0034	36351	36450	-	0	0.431653	0	0	#DIV/0!	#DIV/0!	#DIV/0!	#DIV/0!
CC_0034	36401	36500	-	0.350629	0.431653	0	0	1	1.23108	0	0
CC_0034	36451	36550	-	0.350629	0.431653	0.83443	0.38597	1	1.23108	2.3798	1.10079
CC_0034	36501	36600	-	0.350629	0.431653	0.83443	0.38597	1	1.23108	2.3798	1.10079
CC_0034	36551	36650	-	0	0.431653	0.83443	0.38597	#DIV/0!	#DIV/0!	#DIV/0!	#DIV/0!
CC_0034	36601	36700	-	0	0	0	0	#DIV/0!	#DIV/0!	#DIV/0!	#DIV/0!
CC_0034	36651	36750	-	0	0	0.500658	0.192985	#DIV/0!	#DIV/0!	#DIV/0!	#DIV/0!
CC_0034	36701	36800	-	0	0	0.500658	0.192985	#DIV/0!	#DIV/0!	#DIV/0!	#DIV/0!
CC_0034	36751	36850	-	0	0.215826	0.500658	0.192985	#DIV/0!	#DIV/0!	#DIV/0!	#DIV/0!
CC_0034	36801	36900	-	0.175315	0.431653	0	0	1	2.46216	0	0
CC_0034	36851	36950	-	0.175315	0.431653	0	0	1	2.46216	0	0
CC_0034	36901	37000	-	0.175315	0.215826	0	0	1	1.23108	0	0
CC_0034	36951	37050	-	0	0	0	0	#DIV/0!	#DIV/0!	#DIV/0!	#DIV/0!
CC_0034	37001	37100	-	0	0	0	0	#DIV/0!	#DIV/0!	#DIV/0!	#DIV/0!
CC_0034	37051	37150	-	0	0	0	0	#DIV/0!	#DIV/0!	#DIV/0!	#DIV/0!
CC_0034	37101	37200	-	0.701259	0	0	0	1	0	0	0
CC_0034	37151	37250	-	0.701259	0	0	0	1	0	0	0
CC_0034	37201	37300	-	1.2272	0	0	0	1	0	0	0
CC_0034	37251	37350	-	0.525944	0	0.166886	0	1	0	0.317307	0
CC_0034	37301	37400	-	0.525944	0	0.166886	0	1	0	0.317307	0
CC_0034	37351	37450	-	0	0	0.166886	0	#DIV/0!	#DIV/0!	#DIV/0!	#DIV/0!
CC_0034	37401	37500	-	0	0	0	0	#DIV/0!	#DIV/0!	#DIV/0!	#DIV/0!
CC_0034	37451	37550	-	0	0	0	0	#DIV/0!	#DIV/0!	#DIV/0!	#DIV/0!
CC_0034	37501	37600	-	0	0	0	0	#DIV/0!	#DIV/0!	#DIV/0!	#DIV/0!
CC_0034	37551	37650	-	0.175315	0	0	0	1	0	0	0
CC_0034	37601	37700	-	0.175315	0	0	0	1	0	0	0
CC_0034	37651	37750	-	0.175315	0	0	0	1	0	0	0
CC_0034	37701	37800	-	0	0	0	0	#DIV/0!	#DIV/0!	#DIV/0!	#DIV/0!
CC_0034	37751	37850	-	0	0	0	0	#DIV/0!	#DIV/0!	#DIV/0!	#DIV/0!
CC_0034	37801	37900	-	0	0	0	0	#DIV/0!	#DIV/0!	#DIV/0!	#DIV/0!
CC_0034	37851	37950	-	0	0	0	0.578954	#DIV/0!	#DIV/0!	#DIV/0!	#DIV/0!
CC_0034	37901	38000	-	2.80503	0.863306	0	0.771939	1	0.30777	0	0.275198
CC_0034	37951	38050	-	7.53853	1.29496	0	0.771939	1	0.171779	0	0.102399
	38001	38100		8.94105	4.1007	0.166886	0.192985	1	0.458638	0.0186651	0.0215841
	38051	38150		9.11636	5.17983	3.33772	0	1	0.568191	0.366124	0
	38101	38200		6.48664	5.82731	5.67412	0	1	0.898356	0.874739	0
CC_0035	38151	38250	-	5.08413	3.02157	5.50723	0	1	0.594315	1.08322	0
CC_0035	38201	38300	-	2.27909	1.07913	2.3364	0	1	0.473492	1.02515	0
CC_0035	38251	38350	-	0.175315	0	0	0	1	0	0	0
CC_0035	38301	38400	-	0.175315	0	0	0	1	0	0	0
CC_0035	38351	38450	-	0.701259	0	0.166886	0	1	0	0.237981	0
CC_0035	38401	38500	-	0.701259	0.215826	0.166886	0	1	0.30777	0.237981	0
CC_0035	38451	38550	-	0.701259	0.215826	0.333772	0	1	0.30777	0.475961	0
CC_0036	38501	38600	-	1.75315	2.37409	0.500658	0.38597	1	1.35419	0.285577	0.220158
CC_0036	38551	38650	-	1.75315	2.15826	0.500658	0.38597	1	1.23108	0.285577	0.220158
CC_0036	38601	38700	-	1.75315	2.15826	0.333772	0.38597	1	1.23108	0.190384	0.220158
CC_0036	38651	38750	-	0.175315	2.80574	0	0	1	16.004	0	0
CC_0036	38701	38800	-	0.175315	4.31653	0	0	1	24.6216	0	0
CC_0036	38751	38850	-	7.36322	7.98558	14.1853	17.5616	1	1.08452	1.92651	2.38505
CC_0036	38801	38900	-	14.0252	8.41723	31.5414	33.5793	1	0.600152	2.24892	2.39422
CC_0036	38851	38950	-	14.2005	6.90645	31.5414	33.5793	1	0.486353	2.22115	2.36466
CC_0036	38901	39000	-	7.88916	4.96401	22.6965	18.5265	1	0.629219	2.87692	2.34835
CC_0036	38951	39050	-	4.55818	2.15826	11.3482	4.05268	1	0.473492	2.48964	0.8891
CC_0036	39001	39100	-	4.38287	2.15826	11.3482	4.05268	1	0.492432	2.58923	0.924664
CC_0036	39051	39150	-	3.50629	0.431653	6.00789	1.54388	1	0.123108	1.71346	0.440316
CC_0036	39101	39200	-	0	0.863306	0.83443	25.474	#DIV/0!	#DIV/0!	#DIV/0!	#DIV/0!
CC_0036	39151	39250	-	0	2.15826	1.50197	64.0709	#DIV/0!	#DIV/0!	#DIV/0!	#DIV/0!
CC_0036	39201	39300	-	0	2.15826	1.50197	64.0709	#DIV/0!	#DIV/0!	#DIV/0!	#DIV/0!
CC_0036	39251	39350	-	4.55818	3.2374	2.50329	39.5619	1	0.710238	0.549186	8.67931
CC_0036	39301	39400	-	5.43476	3.45322	3.67149	2.5088	1	0.635396	0.675558	0.461622
CC_0036	39351	39450	-	5.61007	3.45322	3.67149	2.5088	1	0.61554	0.654446	0.447196
CC_0036	39401	39500	-	4.03224	9.71219	22.0289	7.91238	1	2.40864	5.4632	1.96228
CC_0037	39451	39550	-	9.29168	16.187	38.05	13.3159	1	1.74209	4.09506	1.4331
CC_0037	39501	39600	-	10.6942	19.4244	38.3838	13.3159	1	1.81635	3.58921	1.24516
CC_0037	39551	39650	-	9.29168	12.7338	19.025	6.94745	1	1.37045	2.04753	0.747707
CC_0037	39601	39700	-	3.33098	4.74818	1.1682	0	1	1.42546	0.350708	0
CC_0037	39651	39750	-	1.75315	1.51079	0.83443	0	1	0.861756	0.475961	0
CC_0037	39701	39800	-	0.175315	0.215826	0	0	1	1.23108	0	0
CC_0037	39751	39850	-	0	0.431653	0	0	#DIV/0!	#DIV/0!	#DIV/0!	#DIV/0!
CC_0037	39801	39900	-	0.525944	0.431653	0	0	1	0.82072	0	0
CC_0037	39851	39950	-	5.25944	0.431653	9.67938	0	1	0.082072	1.84038	0
CC_0038	39901	40000	-	6.66196	0.647479	19.1919	0.192985	1	0.0971905	2.88082	0.0289682
CC_0038	39951	40050	-	6.13601	0.863306	19.1919	0.192985	1	0.140695	3.12774	0.0314512
CC_0038	40001	40100	-	1.40252	0.647479	9.5125	0.192985	1	0.461655	6.78244	0.137599
CC_0038	40051	40150	-	0	0.215826	0	0	#DIV/0!	#DIV/0!	#DIV/0!	#DIV/0!
CC_0038	40101	40200	-	0	0	0	0	#DIV/0!	#DIV/0!	#DIV/0!	#DIV/0!
CC_0038	40151	40250	-	0	0	0.333772	0	#DIV/0!	#DIV/0!	#DIV/0!	#DIV/0!
CC_0038	40201	40300	-	0	0	0.333772	0	#DIV/0!	#DIV/0!	#DIV/0!	#DIV/0!
CC_0038	40251	40350	-	0	0	0.333772	0	#DIV/0!	#DIV/0!	#DIV/0!	#DIV/0!
CC_0038	40301	40400	-	0	0	0	0	#DIV/0!	#DIV/0!	#DIV/0!	#DIV/0!
CC_0038	40351	40450	-	0	0	0	0	#DIV/0!	#DIV/0!	#DIV/0!	#DIV/0!
CC_0038	40401	40500	-	0.175315	0	2.83706	0	1	0	16.1827	0
CC_0038	40451	40550	-	0.701259	7.98558	5.34035	1.15791	1	11.3875	7.61538	1.65119
CC_0038	40501	40600	-	1.2272	14.6762	5.67412	1.35089	1	11.9591	4.62362	1.10079
CC_0038	40551	40650	-	8.94105	18.7769	6.50855	2.89477	1	2.10008	0.72794	0.323762
CC_0038	40601	40700	-	16.8302	21.151	6.84232	4.43865	1	1.25673	0.40655	0.263731
CC_0038	40651	40750	-	17.1808	30.2157	7.00921	4.24566	1	1.75869	0.407967	0.247116
CC_0038	40701	40800	-	14.2005	38.6329	12.6833	8.10536	1	2.72054	0.893161	0.57078
CC_0038	40751	40850	-	10.3436	30.6474	19.1919	12.93	1	2.96294	1.85544	1.25005
CC_0039	40801	40900	-	19.4599	14.892	20.0263	13.7019	1	0.765266	1.0291	0.704109
CC_0039	40851	40950	-	26.6478	2.37409	11.682	13.123	1	0.0890913	0.438385	0.492459
CC_0039	40901	41000	-	22.0896	0.215826	2.3364	5.59656	1	0.00977048	0.105769	0.253357
CC_0039	40951	41050	-	17.3562	9.71219	16.1879	5.0176	1	0.559582	0.932691	0.289097
CC_0039	41001	41100	-	9.46699	16.6186	36.7149	0.38597	1	1.75543	3.8782	0.04077
CC_0039	41051	41150	-	11.2201	16.4028	37.3824	0.38597	1	1.46191	3.33173	0.0343997
CC_0039	41101	41200	-	6.48664	7.12227	22.3627	0.192985	1	1.09799	3.4475	0.0297511
CC_0039	41151	41250	-	4.38287	4.31653	2.50329	1.35089	1	0.984864	0.571153	0.308221
CC_0039	41201	41300	-	4.20755	5.17983	15.0197	3.28074	1	1.23108	3.56971	0.779727
CC_0039	41251	41350	-	1.75315	1.51079	25.3667	4.24566	1	0.861756	14.4692	2.42174
CC_0039	41301	41400	-	6.48664	5.39566	51.234	10.6142	1	0.831811	7.89838	1.63631
CC_0039	41351	41450	-	7.88916	9.49636	53.2366	15.6318	1	1.20372	6.74807	1.98142
CC_0039	41401	41500	-	7.71385	8.84888	41.0539	13.3159	1	1.14714	5.32211	1.72624
CC_0040	41451	41550	-	11.9214	13.3812	24.1985	13.123	1	1.12246	2.02983	1.10079
CC_0040	41501	41600	-	15.4277	14.2445	16.5217	10.4212	1	0.92331	1.07091	0.675485
CC_0040	41551	41650	-	15.4277	14.2445	16.5217	10.4212	1	0.92331	1.07091	0.675485
CC_0040	41601	41700	-	6.66196	5.82731	7.50987	4.24566	1	0.874715	1.12728	0.6373
CC_0040	41651	41750	-	0.175315	8.41723	2.83706	0	1	48.0121	16.1827	0
CC_0040	41701	41800	-	0.525944	16.6186	4.33903	0.38597	1	31.5977	8.24999	0.73386
CC_0040	41751	41850	-	0.350629	8.2014	1.50197	0.38597	1	23.3905	4.28365	1.10079
CC_0040	41801	41900	-	2.10378	8.84888	1.66886	0.38597	1	4.20619	0.793268	0.183465
CC_0040	41851	41950	-	6.83727	2.58992	7.84364	5.59656	1	0.378794	1.14719	0.818537
CC_0040	41901	42000	-	11.2201	4.31653	15.3535	14.0879	1	0.384713	1.36839	1.25559
CC_0041	41951	42050	-	26.2972	30.2157	66.2537	18.1406	1	1.14901	2.51942	0.689829
CC_0041	42001	42100	-	31.9073	49.8559	119.323	16.2107	1	1.56252	3.73969	0.508057
CC_0041	42051	42150	-	28.0503	50.7192	121.326	7.91238	1	1.80815	4.3253	0.282078
CC_0041	42101	42200	-	12.272	59.9997	72.2616	7.71939	1	4.88915	5.88832	0.629023
CC_0041	42151	42250	-	3.50629	59.3523	18.5243	5.59656	1	16.9274	5.28317	1.59615
CC_0041	42201	42300	-	6.31133	59.1364	19.3588	5.40357	1	9.36989	3.0673	0.856171
CC_0041	42251	42350	-	8.23979	24.3884	22.0289	2.70179	1	2.95983	2.67348	0.327895
CC_0041	42301	42400	-	14.2005	18.9927	31.3745	26.2459	1	1.33747	2.2094	1.84824
CC_0041	42351	42450	-	16.6549	27.41	32.5427	44.5795	1	1.64576	1.95395	2.67666
CC_0041	42401	42500	-	14.3758	32.374	16.3548	31.2635	1	2.25198	1.13766	2.17473
CC_0041	42451	42550	-	6.83727	41.4387	13.0171	37.825	1	6.0607	1.90384	5.53218
CC_0041	42501	42600	-	1.05189	33.2373	1.50197	19.6844	1	31.5977	1.42788	18.7134
CC_0042	42551	42650	-	0.525944	17.4819	1.1682	7.14044	1	33.2392	2.22115	13.5764
CC_0042	42601	42700	-	0.175315	2.58992	0	0.192985	1	14.773	0	1.10079
CC_0042	42651	42750	-	0.525944	0	0	0.192985	1	0	0	0.36693
CC_0042	42701	42800	-	0.350629	0.431653	0	0.192985	1	1.23108	0	0.550395
CC_0042	42751	42850	-	0.350629	0.431653	0	0.192985	1	1.23108	0	0.550395
CC_0042	42801	42900	-	0	0.647479	0	0	#DIV/0!	#DIV/0!	#DIV/0!	#DIV/0!
CC_0042	42851	42950	-	0	0.215826	0	0	#DIV/0!	#DIV/0!	#DIV/0!	#DIV/0!
CC_0042	42901	43000	-	0	0.215826	0	0	#DIV/0!	#DIV/0!	#DIV/0!	#DIV/0!
CC_0042	42951	43050	-	0	0	0	0	#DIV/0!	#DIV/0!	#DIV/0!	#DIV/0!
CC_0042	43001	43100	-	0	0	0	0	#DIV/0!	#DIV/0!	#DIV/0!	#DIV/0!
CC_0042	43051	43150	-	0.175315	0	0	0	1	0	0	0
CC_0042	43101	43200	-	0.175315	0	0	0	1	0	0	0
CC_0042	43151	43250	-	0.175315	0	0.166886	0	1	0	0.951922	0
CC_0042	43201	43300	-	0	0	0.166886	0	#DIV/0!	#DIV/0!	#DIV/0!	#DIV/0!
CC_0042	43251	43350	-	0	0	0.166886	0.192985	#DIV/0!	#DIV/0!	#DIV/0!	#DIV/0!
CC_0042	43301	43400	-	0	0	0	0.192985	#DIV/0!	#DIV/0!	#DIV/0!	#DIV/0!
CC_0042	43351	43450	-	0	0	0	0.192985	#DIV/0!	#DIV/0!	#DIV/0!	#DIV/0!
CC_0042	43401	43500	-	0	0	0	0	#DIV/0!	#DIV/0!	#DIV/0!	#DIV/0!
CC_0042	43451	43550	-	0.525944	0	0	0	1	0	0	0
CC_0042	43501	43600	-	0.525944	0.431653	0	0	1	0.82072	0	0
CC_0042	43551	43650	-	0.525944	0.431653	0	0	1	0.82072	0	0
CC_0042	43601	43700	-	0	0.431653	0	0	#DIV/0!	#DIV/0!	#DIV/0!	#DIV/0!
CC_0042	43651	43750	-	0	0	0	0	#DIV/0!	#DIV/0!	#DIV/0!	#DIV/0!
CC_0042	43701	43800	-	0.350629	1.29496	0.667544	0.771939	1	3.69324	1.90384	2.20158
CC_0042	43751	43850	-	0.350629	1.29496	0.667544	0.771939	1	3.69324	1.90384	2.20158
CC_0042	43801	43900	-	0.350629	1.29496	0.83443	0.771939	1	3.69324	2.3798	2.20158
CC_0042	43851	43950	-	0	0	0.166886	0	#DIV/0!	#DIV/0!	#DIV/0!	#DIV/0!
CC_0042	43901	44000	-	0.701259	2.37409	1.33509	1.35089	1	3.38547	1.90384	1.92638
CC_0042	43951	44050	-	0.701259	2.37409	1.1682	1.35089	1	3.38547	1.66586	1.92638
CC_0042	44001	44100	-	0.701259	2.37409	1.1682	1.35089	1	3.38547	1.66586	1.92638
CC_0042	44051	44150	-	0	0	0	0	#DIV/0!	#DIV/0!	#DIV/0!	#DIV/0!
CC_0042	44101	44200	-	0	0	0	0	#DIV/0!	#DIV/0!	#DIV/0!	#DIV/0!
CC_0042	44151	44250	-	0	0	0.166886	0	#DIV/0!	#DIV/0!	#DIV/0!	#DIV/0!
CC_0042	44201	44300	-	0	0	0.166886	0	#DIV/0!	#DIV/0!	#DIV/0!	#DIV/0!
CC_0042	44251	44350	-	0.701259	3.02157	1.50197	1.15791	1	4.30878	2.14182	1.65119
CC_0042	44301	44400	-	0.701259	3.02157	1.33509	1.15791	1	4.30878	1.90384	1.65119
CC_0042	44351	44450	-	0.701259	3.02157	1.33509	1.15791	1	4.30878	1.90384	1.65119
CC_0042	44401	44500	-	0.350629	0	0	0	1	0	0	0
CC_0042	44451	44550	-	0.350629	0	0	0	1	0	0	0
CC_0042	44501	44600	-	0.350629	0	0	0	1	0	0	0
CC_0042	44551	44650	-	0	0	0	0	#DIV/0!	#DIV/0!	#DIV/0!	#DIV/0!
CC_0042	44601	44700	-	0	0	0	0	#DIV/0!	#DIV/0!	#DIV/0!	#DIV/0!
CC_0042	44651	44750	-	0	0.215826	0	0	#DIV/0!	#DIV/0!	#DIV/0!	#DIV/0!
CC_0042	44701	44800	-	0	0.215826	0	0.192985	#DIV/0!	#DIV/0!	#DIV/0!	#DIV/0!
CC_0042	44751	44850	-	0	0.215826	0.166886	0.192985	#DIV/0!	#DIV/0!	#DIV/0!	#DIV/0!
CC_0042	44801	44900	-	0	0	0.333772	0.192985	#DIV/0!	#DIV/0!	#DIV/0!	#DIV/0!
CC_0042	44851	44950	-	0	0.431653	0.333772	0	#DIV/0!	#DIV/0!	#DIV/0!	#DIV/0!
CC_0042	44901	45000	-	0	0.431653	0.166886	0	#DIV/0!	#DIV/0!	#DIV/0!	#DIV/0!
CC_0042	44951	45050	-	0	0.431653	0	0	#DIV/0!	#DIV/0!	#DIV/0!	#DIV/0!
CC_0042	45001	45100	-	0	0	0	0	#DIV/0!	#DIV/0!	#DIV/0!	#DIV/0!
CC_0042	45051	45150	-	0	0	0	0	#DIV/0!	#DIV/0!	#DIV/0!	#DIV/0!
CC_0042	45101	45200	-	0	0	0	0	#DIV/0!	#DIV/0!	#DIV/0!	#DIV/0!
CC_0042	45151	45250	-	0	0	0	0	#DIV/0!	#DIV/0!	#DIV/0!	#DIV/0!
CC_0042	45201	45300	-	0	0	0	0	#DIV/0!	#DIV/0!	#DIV/0!	#DIV/0!
CC_0042	45251	45350	-	0	0	0	0	#DIV/0!	#DIV/0!	#DIV/0!	#DIV/0!
CC_0042	45301	45400	-	0	0	0	0	#DIV/0!	#DIV/0!	#DIV/0!	#DIV/0!
CC_0042	45351	45450	-	0	0	0	0	#DIV/0!	#DIV/0!	#DIV/0!	#DIV/0!
CC_0042	45401	45500	-	0	0	0.500658	0	#DIV/0!	#DIV/0!	#DIV/0!	#DIV/0!
CC_0042	45451	45550	-	0	0	0.500658	0	#DIV/0!	#DIV/0!	#DIV/0!	#DIV/0!
CC_0042	45501	45600	-	7.53853	0.647479	1.00132	2.12283	1	0.0858893	0.132826	0.281598
CC_0042	45551	45650	-	13.3239	2.80574	2.50329	7.91238	1	0.21058	0.187879	0.593848
CC_0042	45601	45700	-	19.9859	3.2374	4.83969	11.0001	1	0.161984	0.242156	0.550395
CC_0042	45651	45750	-	12.4473	2.58992	5.34035	21.2283	1	0.20807	0.429035	1.70545
	45701	45800		8.41511	1.72661	6.50855	31.4565	1	0.20518	0.773437	3.7381
	45751	45850		4.55818	1.29496	8.17741	28.3688	1	0.284095	1.79401	6.2237
CC_0043	45801	45900	-	5.43476	1.72661	8.51118	16.0177	1	0.317698	1.56607	2.94728
CC_0043	45851	45950	-	3.68161	0.431653	5.34035	0	1	0.117246	1.45055	0
CC_0043	45901	46000	-	0.876573	0.431653	1.33509	0	1	0.492432	1.52308	0
CC_0043	45951	46050	-	0	0	0	0	#DIV/0!	#DIV/0!	#DIV/0!	#DIV/0!
CC_0043	46001	46100	-	0	0.431653	0.500658	0	#DIV/0!	#DIV/0!	#DIV/0!	#DIV/0!
CC_0043	46051	46150	-	0	1.07913	0.500658	0	#DIV/0!	#DIV/0!	#DIV/0!	#DIV/0!
CC_0043	46101	46200	-	0.350629	1.29496	0.500658	0	1	3.69324	1.42788	0
CC_0043	46151	46250	-	0.350629	0.863306	0	0	1	2.46216	0	0
CC_0043	46201	46300	-	0.350629	0.215826	0.333772	0.192985	1	0.61554	0.951922	0.550395
CC_0043	46251	46350	-	0	0	0.333772	0.192985	#DIV/0!	#DIV/0!	#DIV/0!	#DIV/0!
CC_0043	46301	46400	-	0	0	0.333772	0.192985	#DIV/0!	#DIV/0!	#DIV/0!	#DIV/0!
CC_0043	46351	46450	-	0	0	0	0	#DIV/0!	#DIV/0!	#DIV/0!	#DIV/0!
CC_0043	46401	46500	-	0	0	0	0	#DIV/0!	#DIV/0!	#DIV/0!	#DIV/0!
CC_0043	46451	46550	-	0	0	0	0	#DIV/0!	#DIV/0!	#DIV/0!	#DIV/0!
CC_0043	46501	46600	-	3.15566	8.63306	3.83838	3.66671	1	2.73573	1.21634	1.16195
CC_0044	46551	46650	-	4.90881	15.9712	5.00658	14.6668	1	3.25357	1.01992	2.98786
CC_0044	46601	46700	-	4.90881	15.9712	5.00658	14.6668	1	3.25357	1.01992	2.98786
CC_0044	46651	46750	-	2.62972	8.84888	1.66886	11.3861	1	3.36495	0.634615	4.32978
CC_0044	46701	46800	-	0.876573	1.51079	0.667544	0.38597	1	1.72351	0.761538	0.440316
CC_0044	46751	46850	-	0.876573	1.51079	0.667544	0.38597	1	1.72351	0.761538	0.440316
CC_0044	46801	46900	-	0	0	0.166886	0	#DIV/0!	#DIV/0!	#DIV/0!	#DIV/0!
CC_0044	46851	46950	-	0	0	0	0	#DIV/0!	#DIV/0!	#DIV/0!	#DIV/0!
CC_0044	46901	47000	-	0	0	0	0	#DIV/0!	#DIV/0!	#DIV/0!	#DIV/0!
CC_0044	46951	47050	-	0	0	0	0	#DIV/0!	#DIV/0!	#DIV/0!	#DIV/0!
CC_0044	47001	47100	-	0	0	0	0	#DIV/0!	#DIV/0!	#DIV/0!	#DIV/0!
CC_0044	47051	47150	-	0.175315	0	0	0	1	0	0	0
CC_0044	47101	47200	-	0.350629	0	0	0	1	0	0	0
CC_0044	47151	47250	-	0.350629	0	0.166886	0	1	0	0.475961	0
CC_0044	47201	47300	-	0.175315	0	0.166886	0	1	0	0.951922	0
CC_0044	47251	47350	-	0	0.215826	0.166886	0	#DIV/0!	#DIV/0!	#DIV/0!	#DIV/0!
CC_0044	47301	47400	-	0	0.215826	0	0	#DIV/0!	#DIV/0!	#DIV/0!	#DIV/0!
CC_0044	47351	47450	-	0	0.215826	0.333772	0	#DIV/0!	#DIV/0!	#DIV/0!	#DIV/0!
CC_0044	47401	47500	-	0	0	0.333772	0	#DIV/0!	#DIV/0!	#DIV/0!	#DIV/0!
CC_0044	47451	47550	-	0	0	0.333772	0.38597	#DIV/0!	#DIV/0!	#DIV/0!	#DIV/0!
CC_0044	47501	47600	-	151.297	246.258	129.003	70.0535	1	1.62765	0.852648	0.463021
CC_0044	47551	47650	-	151.472	246.258	129.003	70.0535	1	1.62577	0.851662	0.462485
CC_0044	47601	47700	-	151.472	246.258	129.003	69.6675	1	1.62577	0.851662	0.459937
CC_0044	47651	47750	-	0.175315	0	0	0	1	0	0	0
CC_0044	47701	47800	-	0	0	0.166886	0	#DIV/0!	#DIV/0!	#DIV/0!	#DIV/0!
CC_0044	47751	47850	-	0	0	0.166886	0	#DIV/0!	#DIV/0!	#DIV/0!	#DIV/0!
CC_0044	47801	47900	-	0.175315	0	0.166886	0	1	0	0.951922	0
CC_0044	47851	47950	-	0.175315	0	0	0	1	0	0	0
CC_0044	47901	48000	-	0.175315	0	0	0	1	0	0	0
CC_0044	47951	48050	-	0	0.431653	0	0	#DIV/0!	#DIV/0!	#DIV/0!	#DIV/0!
CC_0044	48001	48100	-	0.350629	0.431653	0	0	1	1.23108	0	0
CC_0044	48051	48150	-	0.350629	0.431653	0	0	1	1.23108	0	0
CC_0044	48101	48200	-	0.350629	0	0	0	1	0	0	0
CC_0044	48151	48250	-	0	0	0	0	#DIV/0!	#DIV/0!	#DIV/0!	#DIV/0!
CC_0044	48201	48300	-	0	0	0	0	#DIV/0!	#DIV/0!	#DIV/0!	#DIV/0!
CC_0044	48251	48350	-	0	0	0	0	#DIV/0!	#DIV/0!	#DIV/0!	#DIV/0!
CC_0045	48301	48400	-	0.525944	0	11.3482	2.5088	1	0	21.5769	4.77009
CC_0045	48351	48450	-	1.57783	2.37409	17.3561	7.52641	1	1.50465	11	4.77009
CC_0045	48401	48500	-	1.57783	3.88488	7.00921	12.544	1	2.46216	4.4423	7.95016
CC_0045	48451	48550	-	2.80503	5.17983	7.50987	27.5968	1	1.84662	2.67728	9.83832
CC_0045	48501	48600	-	1.75315	2.80574	1.50197	22.5792	1	1.6004	0.85673	12.8793
CC_0045	48551	48650	-	3.15566	3.02157	1.66886	18.5265	1	0.957507	0.528846	5.87088
CC_0045	48601	48700	-	2.45441	1.72661	1.1682	3.47373	1	0.703474	0.475961	1.4153
CC_0045	48651	48750	-	3.50629	3.66905	1.83574	9.07029	1	1.04642	0.523557	2.58686
CC_0045	48701	48800	-	1.57783	3.2374	0.667544	5.98253	1	2.0518	0.423076	3.79161
CC_0045	48751	48850	-	1.40252	3.2374	0.667544	5.98253	1	2.30828	0.475961	4.26556
CC_0045	48801	48900	-	15.9536	5.61149	0	0.38597	1	0.351737	0	0.0241932
	48851	48950		28.401	8.63306	0.500658	0.964924	1	0.30397	0.0176282	0.033975
	48901	49000		37.1667	18.3452	2.83706	28.1758	1	0.493593	0.0763334	0.758092
	48951	49050		25.4206	20.0719	21.3614	34.9302	1	0.789589	0.840317	1.37409
	49001	49100		26.4725	33.8847	37.2156	66.9657	1	1.28	1.40582	2.52963
CC_0047	49051	49150	+	14.2005	17.2661	16.5217	32.6144	1	1.21588	1.16346	2.29671
CC_0047	49101	49200	+	5.61007	6.90645	14.3522	6.56148	1	1.23108	2.55829	1.16959
CC_0047	49151	49250	+	0	0	0	0	#DIV/0!	#DIV/0!	#DIV/0!	#DIV/0!
CC_0047	49201	49300	+	0.525944	0	0	0	1	0	0	0
CC_0047	49251	49350	+	0.876573	0	0	0	1	0	0	0
CC_0047	49301	49400	+	0.876573	0	0	0	1	0	0	0
CC_0047	49351	49450	+	0.350629	0	0	0	1	0	0	0
CC_0047	49401	49500	+	0	0	0	0	#DIV/0!	#DIV/0!	#DIV/0!	#DIV/0!
CC_0047	49451	49550	+	0	0	0	0	#DIV/0!	#DIV/0!	#DIV/0!	#DIV/0!
CC_0047	49501	49600	+	1.05189	6.69062	6.50855	13.8949	1	6.36058	6.18749	13.2095
CC_0047	49551	49650	+	1.40252	12.5179	15.1866	32.6144	1	8.92533	10.8281	23.2542
CC_0047	49601	49700	+	2.80503	12.7338	29.0381	44.3865	1	4.53961	10.3522	15.8239
CC_0048	49651	49750	-	3.85692	6.90645	35.8805	40.1408	1	1.79066	9.30287	10.4075
CC_0048	49701	49800	-	3.50629	1.07913	27.3693	21.4213	1	0.30777	7.80576	6.10939
CC_0048	49751	49850	-	2.10378	0.863306	13.5178	9.64924	1	0.41036	6.42547	4.58663
CC_0048	49801	49900	-	0	0	0.166886	0	#DIV/0!	#DIV/0!	#DIV/0!	#DIV/0!
CC_0048	49851	49950	-	4.7335	1.94244	6.84232	13.3159	1	0.41036	1.44551	2.81313
CC_0048	49901	50000	-	14.5511	10.7913	11.0145	17.9476	1	0.741615	0.75695	1.23342
CC_0048	49951	50050	-	28.401	20.9352	17.1892	33.5793	1	0.737128	0.605234	1.18233
CC_0048	50001	50100	-	32.6085	36.2588	23.364	22.3862	1	1.11194	0.7165	0.686515
CC_0049	50051	50150	-	24.5441	35.6114	37.2156	6.56148	1	1.45092	1.51628	0.267335
CC_0049	50101	50200	-	14.9017	29.9999	44.8923	3.8597	1	2.01318	3.01255	0.25901
CC_0049	50151	50250	-	7.88916	13.3812	33.5441	2.89477	1	1.69615	4.25192	0.36693
CC_0049	50201	50300	-	4.7335	3.45322	16.021	1.54388	1	0.729529	3.38461	0.32616
CC_0049	50251	50350	-	3.68161	2.80574	3.5046	1.54388	1	0.762097	0.951922	0.419349
CC_0049	50301	50400	-	2.10378	2.15826	1.83574	0.38597	1	1.0259	0.872595	0.183465
CC_0049	50351	50450	-	0.876573	0	0	0	1	0	0	0
CC_0049	50401	50500	-	0.876573	0	0	0	1	0	0	0
CC_0049	50451	50550	-	0.525944	0	0	0	1	0	0	0
CC_0049	50501	50600	-	2.10378	6.04314	0.83443	0.192985	1	2.87252	0.396634	0.0917326
CC_0049	50551	50650	-	2.10378	6.04314	0.83443	0.192985	1	2.87252	0.396634	0.0917326
CC_0049	50601	50700	-	2.45441	6.04314	1.00132	0.192985	1	2.46216	0.407967	0.0786279
CC_0049	50651	50750	-	0.350629	0.215826	0.166886	0	1	0.61554	0.475961	0
CC_0049	50701	50800	-	8.76573	5.82731	4.50592	1.92985	1	0.664783	0.514038	0.220158
CC_0049	50751	50850	-	16.6549	17.4819	30.5401	2.70179	1	1.04966	1.8337	0.162222
CC_0049	50801	50900	-	24.3687	27.8416	78.7701	3.28074	1	1.14251	3.23243	0.134629
metK	50851	50950	-	25.07	25.4675	93.1223	1.54388	1	1.01586	3.71449	0.0615827
metK	50901	51000	-	16.8302	14.0287	66.9212	0.771939	1	0.833544	3.97626	0.0458663
metK	50951	51050	-	9.11636	3.45322	18.6912	0.192985	1	0.378794	2.05029	0.0211691
metK	51001	51100	-	0	0.215826	0	0	#DIV/0!	#DIV/0!	#DIV/0!	#DIV/0!
metK	51051	51150	-	0	0	0	0	#DIV/0!	#DIV/0!	#DIV/0!	#DIV/0!
metK	51101	51200	-	0.175315	0	0	0	1	0	0	0
metK	51151	51250	-	0.175315	0	0	0	1	0	0	0
metK	51201	51300	-	0.175315	0	0	0	1	0	0	0
metK	51251	51350	-	0	0	0	0	#DIV/0!	#DIV/0!	#DIV/0!	#DIV/0!
metK	51301	51400	-	0	0	0	0	#DIV/0!	#DIV/0!	#DIV/0!	#DIV/0!
metK	51351	51450	-	0	0	0	0	#DIV/0!	#DIV/0!	#DIV/0!	#DIV/0!
metK	51401	51500	-	0.175315	0	0	0	1	0	0	0
metK	51451	51550	-	0.350629	0	0	0	1	0	0	0
metK	51501	51600	-	0.350629	0	0	0	1	0	0	0
metK	51551	51650	-	0.175315	0	0.333772	0	1	0	1.90384	0
metK	51601	51700	-	0	0	0.333772	0	#DIV/0!	#DIV/0!	#DIV/0!	#DIV/0!
metK	51651	51750	-	0	0	0.333772	0	#DIV/0!	#DIV/0!	#DIV/0!	#DIV/0!
metK	51701	51800	-	0	0	0	0	#DIV/0!	#DIV/0!	#DIV/0!	#DIV/0!
metK	51751	51850	-	0	0	0	0	#DIV/0!	#DIV/0!	#DIV/0!	#DIV/0!
metK	51801	51900	-	0	0.215826	0	0	#DIV/0!	#DIV/0!	#DIV/0!	#DIV/0!
metK	51851	51950	-	0	0.215826	0	0	#DIV/0!	#DIV/0!	#DIV/0!	#DIV/0!
metK	51901	52000	-	0	0.215826	0	0	#DIV/0!	#DIV/0!	#DIV/0!	#DIV/0!
metK	51951	52050	-	0	0	0	0	#DIV/0!	#DIV/0!	#DIV/0!	#DIV/0!
metK	52001	52100	-	0.350629	0.215826	11.3482	9.64924	1	0.61554	32.3653	27.5198
metK	52051	52150	-	2.62972	9.92802	29.205	24.895	1	3.77531	11.1058	9.4668
metK	52101	52200	-	11.2201	28.2733	58.5769	33.3864	1	2.51987	5.2207	2.97558
hipB	52151	52250	-	24.3687	48.5609	93.9568	30.6846	1	1.99276	3.85563	1.25918
hipB	52201	52300	-	22.7909	39.4962	76.6006	15.4388	1	1.73298	3.36102	0.67741
hipB	52251	52350	-	13.1486	20.5035	41.8884	6.75447	1	1.55937	3.18577	0.513702
hipB	52301	52400	-	5.08413	0.647479	2.16952	5.98253	1	0.127353	0.426724	1.17671
hipB	52351	52450	-	9.29168	1.07913	2.3364	5.98253	1	0.11614	0.251451	0.643859
hipB	52401	52500	-	14.5511	2.58992	19.025	10.8071	1	0.177987	1.30746	0.742702
hipB	52451	52550	-	14.0252	2.58992	29.0381	4.82462	1	0.184662	2.07043	0.343997
hipB	52501	52600	-	9.11636	1.51079	28.3706	4.82462	1	0.165722	3.11205	0.529226
hipB	52551	52650	-	4.38287	0	11.682	36.6671	1	0	2.66538	8.36601
hipB	52601	52700	-	2.62972	4.74818	0.500658	80.8606	1	1.80558	0.190384	30.7488
hipB	52651	52750	-	6.66196	10.7913	3.83838	80.8606	1	1.61984	0.576163	12.1377
CC_0052	52701	52800	-	7.88916	13.5971	6.34166	44.1935	1	1.72351	0.803845	5.6018
CC_0052	52751	52850	-	6.31133	12.0863	6.00789	0	1	1.91501	0.951922	0
CC_0052	52801	52900	-	2.62972	6.04314	2.83706	0	1	2.29802	1.07884	0
CC_0052	52851	52950	-	1.40252	3.45322	1.00132	0	1	2.46216	0.713942	0
CC_0052	52901	53000	-	1.92846	0.215826	1.00132	0	1	0.111916	0.51923	0
CC_0052	52951	53050	-	1.2272	0.215826	1.00132	0	1	0.175869	0.815933	0
CC_0052	53001	53100	-	0.701259	0	0.166886	0	1	0	0.237981	0
CC_0052	53051	53150	-	0	0.647479	0.83443	0	#DIV/0!	#DIV/0!	#DIV/0!	#DIV/0!
CC_0052	53101	53200	-	1.57783	1.94244	1.83574	0	1	1.23108	1.16346	0
CC_0052	53151	53250	-	4.20755	6.69062	4.50592	0.192985	1	1.59015	1.07091	0.0458663
CC_0052	53201	53300	-	8.41511	26.5466	6.34166	0.964924	1	3.15464	0.753605	0.114666
CC_0052	53251	53350	-	10.3436	38.6329	8.3443	1.15791	1	3.73497	0.806714	0.111945
CC_0052	53301	53400	-	8.06447	34.1006	7.00921	0.964924	1	4.22849	0.869146	0.119651
CC_0052	53351	53450	-	3.85692	14.0287	4.50592	0.192985	1	3.63728	1.16827	0.0500359
CC_0052	53401	53500	-	8.59042	9.92802	3.5046	0	1	1.15571	0.407967	0
CC_0052	53451	53550	-	18.2327	15.9712	3.33772	0.771939	1	0.875961	0.183062	0.0423381
CC_0052	53501	53600	-	23.3169	19.856	3.5046	0.771939	1	0.851574	0.150303	0.0331065
CC_0052	53551	53650	-	24.7194	13.5971	2.50329	1.15791	1	0.550057	0.101268	0.0468422
CC_0052	53601	53700	-	17.1808	8.2014	2.16952	0.38597	1	0.477358	0.126275	0.0224651
CC_0052	53651	53750	-	11.5708	4.31653	2.00263	0.38597	1	0.373055	0.173077	0.0333573
CC_0052	53701	53800	-	2.45441	1.29496	0.83443	0	1	0.527606	0.339972	0
CC_0052	53751	53850	-	0.175315	0.431653	0	0	1	2.46216	0	0
CC_0052	53801	53900	-	0.350629	0	0	0	1	0	0	0
CC_0052	53851	53950	-	1.05189	0	0	0.192985	1	0	0	0.183465
CC_0052	53901	54000	-	0.876573	0	0.333772	0.192985	1	0	0.380769	0.220158
CC_0052	53951	54050	-	1.05189	0	0.333772	0.192985	1	0	0.317307	0.183465
CC_0052	54001	54100	-	0.701259	0	0.333772	0	1	0	0.475961	0
CC_0052	54051	54150	-	0.701259	0.215826	0	0	1	0.30777	0	0
CC_0052	54101	54200	-	0.701259	0.215826	0	0	1	0.30777	0	0
CC_0052	54151	54250	-	0.350629	0.215826	0	0	1	0.61554	0	0
CC_0052	54201	54300	-	8.06447	13.3812	12.6833	1.73686	1	1.65928	1.57274	0.215372
CC_0052	54251	54350	-	17.1808	31.9423	24.5322	3.08776	1	1.85918	1.42788	0.179721
corC	54301	54400	-	17.3562	31.9423	24.866	3.08776	1	1.8404	1.43269	0.177906
corC	54351	54450	-	9.99294	18.7769	12.3496	1.35089	1	1.87902	1.23583	0.135185
corC	54401	54500	-	0.525944	0.647479	0.500658	0	1	1.23108	0.951922	0
corC	54451	54550	-	0.350629	0.647479	0.166886	0	1	1.84662	0.475961	0
corC	54501	54600	-	0.876573	0.863306	0.333772	0	1	0.984864	0.380769	0
corC	54551	54650	-	2.27909	1.51079	0.333772	0	1	0.662889	0.14645	0
corC	54601	54700	-	2.27909	1.51079	0.333772	0	1	0.662889	0.14645	0
corC	54651	54750	-	41.0236	5.61149	8.84495	12.158	1	0.136787	0.215606	0.296367
corC	54701	54800	-	75.7359	13.3812	17.0224	28.9477	1	0.176683	0.224759	0.382219
corC	54751	54850	-	75.7359	13.3812	17.0224	28.9477	1	0.176683	0.224759	0.382219
corC	54801	54900	-	36.2901	8.84888	9.34561	27.2109	1	0.243837	0.257525	0.749814
corC	54851	54950	-	0.175315	1.29496	2.50329	16.9827	1	7.38648	14.2788	96.8696
corC	54901	55000	-	3.15566	4.1007	10.3469	30.2986	1	1.29947	3.27884	9.60134
corC	54951	55050	-	11.0448	8.41723	20.8607	28.5617	1	0.762097	1.88873	2.58598
corC	55001	55100	-	46.9843	10.1438	23.0303	22.1932	1	0.215898	0.490169	0.472354
corC	55051	55150	-	44.004	7.3381	15.1866	8.8773	1	0.16676	0.345119	0.201739
corC	55101	55200	-	75.3853	6.90645	6.34166	0.38597	1	0.0916153	0.0841233	0.00511996
corC	55151	55250	-	43.478	7.76975	4.67281	0.578954	1	0.178705	0.107475	0.013316
corC	55201	55300	-	43.6534	8.84888	5.17346	1.15791	1	0.202708	0.118512	0.0265251
CC_0054	55251	55350	-	4.7335	6.25897	2.3364	0.964924	1	1.32227	0.493589	0.20385
CC_0054	55301	55400	-	1.40252	2.37409	1.00132	0.578954	1	1.69274	0.713942	0.412797
CC_0054	55351	55450	-	1.2272	1.29496	0.500658	0	1	1.05521	0.407967	0
CC_0054	55401	55500	-	0.876573	0	0.667544	0	1	0	0.761538	0
CC_0054	55451	55550	-	0.525944	0	0.333772	0	1	0	0.634615	0
CC_0054	55501	55600	-	0.525944	0	0.333772	0	1	0	0.634615	0
CC_0054	55551	55650	-	4.7335	10.3597	4.17215	0	1	2.18859	0.881409	0
CC_0054	55601	55700	-	24.8947	33.0214	21.0276	0	1	1.32645	0.844663	0
phoH	55651	55750	-	41.3743	52.8775	32.0421	0.38597	1	1.27803	0.774445	0.00932874
phoH	55701	55800	-	52.945	66.2587	50.9002	3.28074	1	1.25146	0.961378	0.061965
phoH	55751	55850	-	42.6015	60.8631	52.7359	4.82462	1	1.42866	1.23789	0.11325
phoH	55801	55900	-	26.1219	41.007	41.7215	4.43865	1	1.56983	1.59718	0.169921
phoH	55851	55950	-	11.9214	17.2661	21.8621	1.73686	1	1.44833	1.83385	0.145693
phoH	55901	56000	-	3.85692	0.215826	4.17215	0.192985	1	0.0559582	1.08173	0.0500359
phoH	55951	56050	-	3.85692	0.215826	4.50592	0.192985	1	0.0559582	1.16827	0.0500359
phoH	56001	56100	-	24.3687	12.0863	19.8594	22.1932	1	0.495975	0.814955	0.910726
phoH	56051	56150	-	46.4584	26.115	41.5546	61.9481	1	0.562116	0.894447	1.33341
phoH	56101	56200	-	46.6337	27.1941	43.5572	61.9481	1	0.583143	0.934029	1.3284
phoH	56151	56250	-	24.8947	16.6186	25.7004	39.7549	1	0.667558	1.03237	1.59692
phoH	56201	56300	-	7.71385	7.12227	9.17872	2.89477	1	0.92331	1.1899	0.37527
phoH	56251	56350	-	12.798	14.4604	11.3482	5.40357	1	1.1299	0.886722	0.422221
phoH	56301	56400	-	12.272	13.1654	10.8476	5.40357	1	1.0728	0.883928	0.440316
phoH	56351	56450	-	5.25944	8.63306	6.17478	2.5088	1	1.64144	1.17404	0.477009
phoH	56401	56500	-	0	0.215826	1.66886	0.192985	#DIV/0!	#DIV/0!	#DIV/0!	#DIV/0!
phoH	56451	56550	-	0.876573	0.215826	1.66886	0.192985	1	0.246216	1.90384	0.220158
phoH	56501	56600	-	0.876573	0	0	0.192985	1	0	0	0.220158
phoH	56551	56650	-	0.876573	0	0	0	1	0	0	0
phoH	56601	56700	-	0.525944	0	0	2.5088	1	0	0	4.77009
phoH	56651	56750	-	0.525944	1.07913	2.50329	11.3861	1	2.0518	4.75961	21.6489
CC_0056	56701	56800	-	0.525944	1.72661	3.67149	14.0879	1	3.28288	6.98076	26.7859
CC_0056	56751	56850	-	0.350629	4.1007	4.33903	11.7721	1	11.6953	12.375	33.5741
CC_0056	56801	56900	-	0.350629	3.02157	2.00263	2.89477	1	8.61756	5.71153	8.25593
CC_0056	56851	56950	-	6.31133	6.04314	1.33509	0.192985	1	0.957507	0.211538	0.0305775
CC_0056	56901	57000	-	9.64231	4.96401	1.00132	0	1	0.514815	0.103846	0
CC_0056	56951	57050	-	9.64231	4.96401	0.83443	0	1	0.514815	0.0865384	0
CC_0056	57001	57100	-	18.5834	25.4675	26.368	1.73686	1	1.37045	1.4189	0.0934634
CC_0056	57051	57150	-	23.4922	60.8631	45.5598	23.5441	1	2.59078	1.93936	1.00221
CC_0056	57101	57200	-	28.2257	88.9205	52.2353	52.2989	1	3.15034	1.85063	1.85288
CC_0056	57151	57250	-	15.603	78.1292	33.8778	58.0884	1	5.00732	2.17124	3.7229
CC_0056	57201	57300	-	8.59042	41.4387	15.3535	37.2461	1	4.82382	1.78728	4.33577
CC_0056	57251	57350	-	5.9607	13.3812	10.6807	10.4212	1	2.24491	1.79185	1.74831
CC_0056	57301	57400	-	5.43476	0.431653	5.17346	4.63163	1	0.0794245	0.951922	0.852225
CC_0056	57351	57450	-	10.3436	6.69062	10.3469	25.088	1	0.646839	1.00032	2.42547
CC_0056	57401	57500	-	13.6745	15.1078	13.6846	42.4567	1	1.10482	1.00074	3.10479
CC_0056	57451	57550	-	11.9214	14.6762	11.5151	40.9128	1	1.23108	0.965921	3.43188
CC_0056	57501	57600	-	5.43476	8.41723	6.67544	19.4915	1	1.54878	1.22829	3.58645
CC_0056	57551	57650	-	1.75315	5.39566	11.0145	1.15791	1	3.0777	6.28268	0.660474
CC_0056	57601	57700	-	3.85692	10.3597	19.8594	3.08776	1	2.68599	5.14903	0.800575
CC_0056	57651	57750	-	4.55818	10.3597	19.5256	3.08776	1	2.27276	4.28365	0.67741
CC_0056	57701	57800	-	9.11636	8.84888	16.1879	3.66671	1	0.970659	1.7757	0.402212
CC_0056	57751	57850	-	12.4473	6.69062	14.686	3.47373	1	0.537514	1.17985	0.279074
CC_0056	57801	57900	-	16.6549	13.5971	16.6886	8.49133	1	0.816401	1.00202	0.50984
CC_0056	57851	57950	-	22.9662	19.6402	26.2011	41.4917	1	0.855178	1.14085	1.80664
CC_0056	57901	58000	-	47.5103	31.079	39.552	77.0009	1	0.654153	0.832493	1.62072
CC_0056	57951	58050	-	42.9521	25.2517	37.5493	71.9833	1	0.587904	0.874214	1.6759
CC_0056	58001	58100	-	30.3294	15.3237	21.8621	39.7549	1	0.505241	0.72082	1.31077
	58051	58150		0.350629	1.07913	0.333772	5.40357	1	3.0777	0.951922	15.4111
	58101	58200		4.55818	0.431653	9.67938	5.40357	1	0.0946985	2.12352	1.18547
CC_0057	58151	58250	-	10.1683	2.37409	21.3614	3.08776	1	0.233481	2.10079	0.303666
CC_0057	58201	58300	-	10.3436	2.37409	21.6952	0.38597	1	0.229523	2.09746	0.0373149
CC_0057	58251	58350	-	5.78538	1.94244	12.3496	0.38597	1	0.335749	2.13461	0.0667146
CC_0057	58301	58400	-	1.05189	0	0.500658	0.192985	1	0	0.475961	0.183465
CC_0057	58351	58450	-	0.876573	0.215826	0	0	1	0.246216	0	0
CC_0057	58401	58500	-	0.876573	0.215826	0	0	1	0.246216	0	0
CC_0057	58451	58550	-	0	0.215826	0	0	#DIV/0!	#DIV/0!	#DIV/0!	#DIV/0!
CC_0057	58501	58600	-	3.15566	4.74818	0.83443	3.47373	1	1.50465	0.264423	1.10079
CC_0057	58551	58650	-	11.5708	16.8345	20.1932	7.52641	1	1.45491	1.74519	0.650467
CC_0057	58601	58700	-	24.1934	25.4675	52.5691	20.0704	1	1.05266	2.17287	0.829581
CC_0058	58651	58750	-	31.206	23.7409	69.9252	35.7022	1	0.76078	2.24076	1.14408
CC_0058	58701	58800	-	25.5959	12.3021	50.9002	31.6495	1	0.480627	1.9886	1.2365
CC_0058	58751	58850	-	12.9733	3.66905	18.8581	19.1055	1	0.282816	1.45361	1.47268
CC_0058	58801	58900	-	2.80503	0.647479	2.67017	0	1	0.230828	0.951922	0
CC_0058	58851	58950	-	0	0	2.3364	0	#DIV/0!	#DIV/0!	#DIV/0!	#DIV/0!
CC_0058	58901	59000	-	0	0.215826	2.00263	0.38597	#DIV/0!	#DIV/0!	#DIV/0!	#DIV/0!
CC_0058	58951	59050	-	0	0.215826	0	0.38597	#DIV/0!	#DIV/0!	#DIV/0!	#DIV/0!
CC_0058	59001	59100	-	2.10378	21.151	14.5191	5.0176	1	10.0538	6.90143	2.38505
CC_0058	59051	59150	-	5.78538	35.8272	29.3719	24.895	1	6.19271	5.07692	4.30309
CC_0058	59101	59200	-	7.53853	36.4747	31.2077	36.6671	1	4.83843	4.13975	4.86396
CC_0059	59151	59250	-	5.43476	15.5395	16.6886	31.6495	1	2.85928	3.07072	5.82354
CC_0059	59201	59300	-	1.75315	0.647479	1.83574	11.7721	1	0.369324	1.04711	6.71482
CC_0059	59251	59350	-	0.525944	2.58992	0.500658	44.5795	1	4.92432	0.951922	84.7609
CC_0059	59301	59400	-	1.57783	5.82731	1.33509	93.2117	1	3.69324	0.846153	59.0758
CC_0059	59351	59450	-	1.92846	5.82731	1.33509	93.2117	1	3.02174	0.692307	48.3347
CC_0059	59401	59500	-	1.75315	3.2374	0.83443	48.6322	1	1.84662	0.475961	27.7399
CC_0059	59451	59550	-	0.701259	0	0	0	1	0	0	0
CC_0059	59501	59600	-	0.525944	0	0	0	1	0	0	0
CC_0059	59551	59650	-	0.175315	0	0	0	1	0	0	0
CC_0059	59601	59700	-	0.175315	0	0.166886	0	1	0	0.951922	0
CC_0059	59651	59750	-	0	0	0.166886	0	#DIV/0!	#DIV/0!	#DIV/0!	#DIV/0!
CC_0059	59701	59800	-	3.15566	0.215826	0.166886	0	1	0.0683933	0.0528846	0
CC_0060	59751	59850	-	14.7264	5.17983	1.33509	15.6318	1	0.351737	0.0906592	1.06148
CC_0060	59801	59900	-	64.6911	99.2802	40.5533	60.4042	1	1.53468	0.626875	0.933733
CC_0060	59851	59950	-	61.7108	99.9276	40.887	60.4042	1	1.61929	0.662559	0.978828
CC_0060	59901	60000	-	58.2045	98.201	42.7228	51.9129	1	1.68717	0.734012	0.891906
CC_0060	59951	60050	-	18.7587	8.2014	7.17609	19.1055	1	0.437206	0.382548	1.01849
CC_0060	60001	60100	-	18.934	7.98558	7.00921	19.1055	1	0.421759	0.370192	1.00906
CC_0060	60051	60150	-	19.9859	6.90645	13.3509	24.1231	1	0.345566	0.668015	1.20701
CC_0060	60101	60200	-	17.8821	3.45322	14.8528	23.5441	1	0.193111	0.830599	1.31663
CC_0060	60151	60250	-	17.7068	2.80574	15.1866	23.5441	1	0.158456	0.857672	1.32967
CC_0060	60201	60300	-	8.59042	0.647479	6.50855	11.5791	1	0.0753723	0.757652	1.34791
CC_0060	60251	60350	-	23.6675	4.53235	3.83838	0.192985	1	0.191501	0.162179	0.00815401
CC_0060	60301	60400	-	49.4387	9.71219	4.83969	0.578954	1	0.196449	0.0978927	0.0117105
CC_0060	60351	60450	-	49.4387	9.71219	4.00526	0.38597	1	0.196449	0.0810146	0.00780703
	60401	60500		27.5244	5.61149	2.50329	0.38597	1	0.203873	0.090948	0.0140228
CC_0061	60451	60550	-	1.75315	1.29496	1.1682	0.192985	1	0.738648	0.666345	0.110079
CC_0061	60501	60600	-	1.75315	1.29496	1.1682	0.192985	1	0.738648	0.666345	0.110079
CC_0061	60551	60650	-	0.350629	0.863306	0	0.192985	1	2.46216	0	0.550395
CC_0061	60601	60700	-	6.13601	4.1007	4.50592	1.54388	1	0.668301	0.73434	0.251609
CC_0061	60651	60750	-	14.0252	11.6546	11.1814	2.70179	1	0.830979	0.797235	0.192638
CC_0061	60701	60800	-	14.0252	11.6546	11.1814	3.08776	1	0.830979	0.797235	0.220158
CC_0061	60751	60850	-	11.9214	9.49636	18.5243	18.1406	1	0.796581	1.55387	1.52168
CC_0061	60801	60900	-	6.66196	4.53235	28.3706	29.9126	1	0.680334	4.2586	4.49007
CC_0061	60851	60950	-	6.83727	10.3597	29.7057	29.5267	1	1.51518	4.34467	4.31849
CC_0061	60901	61000	-	5.78538	22.2301	23.364	12.93	1	3.84246	4.03846	2.23494
CC_0061	60951	61050	-	5.9607	26.3308	9.34561	0	1	4.41741	1.56787	0
CC_0061	61001	61100	-	7.1879	20.5035	8.01052	0	1	2.8525	1.11445	0
CC_0061	61051	61150	-	4.55818	6.69062	2.67017	0	1	1.46783	0.585798	0
CC_0061	61101	61200	-	2.45441	0	1.83574	0	1	0	0.747939	0
CC_0062	61151	61250	-	0.876573	0	1.83574	0	1	0	2.09423	0
CC_0062	61201	61300	-	1.05189	0	1.83574	0	1	0	1.74519	0
CC_0062	61251	61350	-	0.350629	0	0.166886	0	1	0	0.475961	0
CC_0062	61301	61400	-	0.350629	0	0.667544	0	1	0	1.90384	0
CC_0062	61351	61450	-	0	0	1.33509	0	#DIV/0!	#DIV/0!	#DIV/0!	#DIV/0!
CC_0062	61401	61500	-	0	0	1.33509	0	#DIV/0!	#DIV/0!	#DIV/0!	#DIV/0!
CC_0062	61451	61550	-	0	0	0.83443	0	#DIV/0!	#DIV/0!	#DIV/0!	#DIV/0!
CC_0062	61501	61600	-	0	0	0	0.192985	#DIV/0!	#DIV/0!	#DIV/0!	#DIV/0!
CC_0062	61551	61650	-	0	0	0	0.192985	#DIV/0!	#DIV/0!	#DIV/0!	#DIV/0!
CC_0062	61601	61700	-	0	0	0	0.192985	#DIV/0!	#DIV/0!	#DIV/0!	#DIV/0!
CC_0062	61651	61750	-	0	0	0.333772	0	#DIV/0!	#DIV/0!	#DIV/0!	#DIV/0!
CC_0062	61701	61800	-	0	0	0.500658	1.92985	#DIV/0!	#DIV/0!	#DIV/0!	#DIV/0!
CC_0062	61751	61850	-	0	0	0.500658	4.24566	#DIV/0!	#DIV/0!	#DIV/0!	#DIV/0!
CC_0063	61801	61900	+	1.2272	2.37409	0.83443	4.43865	1	1.93455	0.679944	3.61688
CC_0063	61851	61950	+	25.9466	16.187	13.5178	4.24566	1	0.623858	0.520984	0.163631
CC_0063	61901	62000	+	53.2957	25.8992	26.7017	12.93	1	0.485953	0.501012	0.242608
CC_0063	61951	62050	+	56.276	26.9783	35.3798	22.5792	1	0.479393	0.628684	0.401223
CC_0063	62001	62100	+	33.6604	15.3237	25.7004	20.8424	1	0.455243	0.763521	0.619195
CC_0063	62051	62150	+	6.31133	5.61149	12.5164	9.84222	1	0.889113	1.98317	1.55945
CC_0063	62101	62200	+	2.10378	2.15826	3.17083	0	1	1.0259	1.50721	0
CC_0063	62151	62250	+	0.175315	0	0	0	1	0	0	0
CC_0063	62201	62300	+	0.175315	0	0	0	1	0	0	0
CC_0063	62251	62350	+	0.175315	0.431653	0	0	1	2.46216	0	0
CC_0063	62301	62400	+	326.962	632.587	309.74	168.09	1	1.93474	0.947328	0.514096
CC_0063	62351	62450	+	326.962	632.587	309.74	168.09	1	1.93474	0.947328	0.514096
CC_0063	62401	62500	+	327.137	633.882	320.922	168.476	1	1.93766	0.981	0.515
CC_0063	62451	62550	+	0.175315	4.31653	20.0263	0.578954	1	24.6216	114.231	3.30237
CC_0063	62501	62600	+	5.61007	4.74818	29.5388	0.578954	1	0.846368	5.26532	0.103199
CC_0063	62551	62650	+	15.4277	3.02157	35.046	0.192985	1	0.195854	2.27163	0.012509
CC_0063	62601	62700	+	20.8624	1.51079	26.5349	4.43865	1	0.0724165	1.2719	0.212758
CC_0063	62651	62750	+	21.739	3.66905	18.0237	9.45625	1	0.168777	0.829093	0.43499
CC_0063	62701	62800	+	17.5315	32.374	18.0237	5.40357	1	1.84662	1.02808	0.308221
CC_0063	62751	62850	+	44.004	71.2227	46.3943	6.17551	1	1.61855	1.05432	0.14034
CC_0063	62801	62900	+	46.809	72.9493	51.9015	1.15791	1	1.55845	1.10879	0.0247369
CC_0063	62851	62950	+	36.1148	43.1653	35.046	0.771939	1	1.19522	0.970406	0.0213746
CC_0063	62901	63000	+	9.64231	4.31653	6.67544	0	1	0.447666	0.692307	0
CC_0063	62951	63050	+	2.80503	0.647479	7.50987	0	1	0.230828	2.67728	0
CC_0063	63001	63100	+	7.88916	2.37409	11.3482	18.3336	1	0.300931	1.43846	2.32389
CC_0063	63051	63150	+	8.23979	2.37409	11.682	30.8776	1	0.288125	1.41776	3.74737
CC_0063	63101	63200	+	5.9607	1.72661	4.33903	30.8776	1	0.289666	0.72794	5.18019
CC_0063	63151	63250	+	25.2453	3.2374	5.17346	25.474	1	0.128238	0.204928	1.00906
	63201	63300		63.9899	7.98558	17.3561	27.2109	1	0.124794	0.271233	0.425237
trpS	63251	63350	-	64.3405	11.0071	25.5335	28.7547	1	0.171077	0.39685	0.446915
trpS	63301	63400	-	39.4458	7.76975	20.6939	15.8248	1	0.196973	0.524615	0.401177
trpS	63351	63450	-	0.350629	3.02157	8.17741	1.54388	1	8.61756	23.3221	4.40316
trpS	63401	63500	-	0	0	0	0	#DIV/0!	#DIV/0!	#DIV/0!	#DIV/0!
trpS	63451	63550	-	1.2272	3.2374	1.66886	0.192985	1	2.63803	1.35989	0.157256
trpS	63501	63600	-	1.40252	3.2374	1.66886	0.192985	1	2.30828	1.1899	0.137599
trpS	63551	63650	-	1.40252	3.2374	1.66886	0.578954	1	2.30828	1.1899	0.412797
trpS	63601	63700	-	0.175315	0	0	0.38597	1	0	0	2.20158
trpS	63651	63750	-	0	0	0	0.38597	#DIV/0!	#DIV/0!	#DIV/0!	#DIV/0!
trpS	63701	63800	-	0.175315	0	0	0	1	0	0	0
trpS	63751	63850	-	0.175315	0	0	0	1	0	0	0
trpS	63801	63900	-	0.350629	0	0	0	1	0	0	0
trpS	63851	63950	-	0.175315	0	0	0	1	0	0	0
trpS	63901	64000	-	0.350629	0	0.333772	0	1	0	0.951922	0
trpS	63951	64050	-	0.175315	0	0.83443	0	1	0	4.75961	0
trpS	64001	64100	-	0.175315	0.215826	0.83443	0	1	1.23108	4.75961	0
trpS	64051	64150	-	0	0.215826	0.500658	0	#DIV/0!	#DIV/0!	#DIV/0!	#DIV/0!
trpS	64101	64200	-	0	0.215826	0	0	#DIV/0!	#DIV/0!	#DIV/0!	#DIV/0!
trpS	64151	64250	-	0	0	0	0	#DIV/0!	#DIV/0!	#DIV/0!	#DIV/0!
trpS	64201	64300	-	1.40252	1.29496	0.667544	0	1	0.92331	0.475961	0
trpS	64251	64350	-	2.27909	1.29496	1.1682	0	1	0.568191	0.512573	0
trpS	64301	64400	-	7.53853	1.72661	2.3364	0	1	0.229038	0.309928	0
trpS	64351	64450	-	9.64231	1.94244	7.00921	7.33342	1	0.201449	0.726922	0.760546
	64401	64500		9.29168	2.37409	9.5125	15.2458	1	0.255507	1.02377	1.6408
mviN	64451	64550	-	4.03224	1.94244	8.51118	15.2458	1	0.481727	2.11078	3.78098
mviN	64501	64600	-	0.525944	0.431653	3.17083	7.91238	1	0.82072	6.02884	15.0441
mviN	64551	64650	-	0	0	0.166886	0	#DIV/0!	#DIV/0!	#DIV/0!	#DIV/0!
mviN	64601	64700	-	0	0	0	0	#DIV/0!	#DIV/0!	#DIV/0!	#DIV/0!
mviN	64651	64750	-	0	0	0	0	#DIV/0!	#DIV/0!	#DIV/0!	#DIV/0!
mviN	64701	64800	-	0	0	0	0	#DIV/0!	#DIV/0!	#DIV/0!	#DIV/0!
mviN	64751	64850	-	0	0	0	0	#DIV/0!	#DIV/0!	#DIV/0!	#DIV/0!
mviN	64801	64900	-	0	0	0	0.192985	#DIV/0!	#DIV/0!	#DIV/0!	#DIV/0!
mviN	64851	64950	-	0	0	0	0.192985	#DIV/0!	#DIV/0!	#DIV/0!	#DIV/0!
mviN	64901	65000	-	0	0	0	0.192985	#DIV/0!	#DIV/0!	#DIV/0!	#DIV/0!
mviN	64951	65050	-	0.350629	0	0	0	1	0	0	0
mviN	65001	65100	-	0.350629	0	0	0	1	0	0	0
mviN	65051	65150	-	0.350629	0	0	0	1	0	0	0
mviN	65101	65200	-	0	0	0	0	#DIV/0!	#DIV/0!	#DIV/0!	#DIV/0!
mviN	65151	65250	-	0	0	0	0	#DIV/0!	#DIV/0!	#DIV/0!	#DIV/0!
mviN	65201	65300	-	0	0	0	0	#DIV/0!	#DIV/0!	#DIV/0!	#DIV/0!
mviN	65251	65350	-	0	0	0.166886	0	#DIV/0!	#DIV/0!	#DIV/0!	#DIV/0!
mviN	65301	65400	-	0	0.431653	0.500658	0	#DIV/0!	#DIV/0!	#DIV/0!	#DIV/0!
mviN	65351	65450	-	0	0.431653	0.500658	0	#DIV/0!	#DIV/0!	#DIV/0!	#DIV/0!
mviN	65401	65500	-	0.175315	0.431653	0.333772	0	1	2.46216	1.90384	0
mviN	65451	65550	-	0.175315	0	0	0	1	0	0	0
mviN	65501	65600	-	0.175315	0	0	0	1	0	0	0
mviN	65551	65650	-	0	0.215826	0	0	#DIV/0!	#DIV/0!	#DIV/0!	#DIV/0!
mviN	65601	65700	-	0	0.215826	0	0	#DIV/0!	#DIV/0!	#DIV/0!	#DIV/0!
mviN	65651	65750	-	0	0.215826	0	0	#DIV/0!	#DIV/0!	#DIV/0!	#DIV/0!
mviN	65701	65800	-	0.175315	0.215826	0	0	1	1.23108	0	0
mviN	65751	65850	-	0.175315	0.431653	0	0	1	2.46216	0	0
mviN	65801	65900	-	931.096	1630.14	589.107	393.303	1	1.75077	0.632703	0.422409
mviN	65851	65950	-	930.921	1630.14	589.107	393.303	1	1.7511	0.632822	0.422488
mviN	65901	66000	-	930.921	1630.57	589.107	393.303	1	1.75157	0.632822	0.422488
mviN	65951	66050	-	0.175315	0.863306	0	0	1	4.92432	0	0
mviN	66001	66100	-	0.525944	3.02157	0	0	1	5.74504	0	0
mviN	66051	66150	-	1.92846	4.74818	4.17215	0	1	2.46216	2.16346	0
	66101	66200		2.45441	8.41723	5.67412	0.192985	1	3.42944	2.31181	0.0786279
	66151	66250		7.53853	11.6546	10.18	1.73686	1	1.54601	1.3504	0.230398
	66201	66300		6.13601	9.28054	8.84495	2.12283	1	1.51247	1.44148	0.345963
CC_0066	66251	66350	-	5.43476	5.82731	7.34298	3.08776	1	1.07223	1.35112	0.56815
CC_0066	66301	66400	-	0	0.431653	13.184	6.17551	#DIV/0!	#DIV/0!	#DIV/0!	#DIV/0!
CC_0066	66351	66450	-	17.1808	1.07913	27.2024	40.9128	1	0.0628102	1.5833	2.3813
CC_0066	66401	66500	-	30.8554	3.45322	45.2261	82.9835	1	0.111916	1.46574	2.68943
CC_0066	66451	66550	-	30.8554	3.2374	34.8792	78.3518	1	0.104922	1.13041	2.53932
CC_0066	66501	66600	-	16.6549	29.784	22.6965	44.5795	1	1.78831	1.36275	2.67666
CC_0066	66551	66650	-	7.36322	47.4818	10.6807	1.54388	1	6.44851	1.45055	0.209674
CC_0066	66601	66700	-	7.36322	47.4818	10.6807	1.54388	1	6.44851	1.45055	0.209674
CC_0066	66651	66750	-	4.90881	23.3093	7.84364	0.192985	1	4.74845	1.59787	0.039314
CC_0066	66701	66800	-	0.525944	3.45322	5.00658	0	1	6.56576	9.51922	0
CC_0066	66751	66850	-	0.525944	3.45322	5.00658	0	1	6.56576	9.51922	0
CC_0066	66801	66900	-	0	0.431653	3.17083	0	#DIV/0!	#DIV/0!	#DIV/0!	#DIV/0!
CC_0066	66851	66950	-	0	0	0	0	#DIV/0!	#DIV/0!	#DIV/0!	#DIV/0!
CC_0066	66901	67000	-	0	0.215826	0	0	#DIV/0!	#DIV/0!	#DIV/0!	#DIV/0!
CC_0066	66951	67050	-	0	0.215826	0	0	#DIV/0!	#DIV/0!	#DIV/0!	#DIV/0!
CC_0066	67001	67100	-	0	0.215826	0	0	#DIV/0!	#DIV/0!	#DIV/0!	#DIV/0!
CC_0066	67051	67150	-	0.525944	0.647479	0	0	1	1.23108	0	0
CC_0066	67101	67200	-	0.525944	0.863306	2.50329	0	1	1.64144	4.75961	0
CC_0066	67151	67250	-	1.40252	1.07913	3.33772	0	1	0.769425	2.37981	0
CC_0066	67201	67300	-	0.876573	0.431653	3.33772	0	1	0.492432	3.80769	0
CC_0066	67251	67350	-	0.876573	0.215826	0.83443	0.192985	1	0.246216	0.951922	0.220158
CC_0066	67301	67400	-	0	0	0	0.192985	#DIV/0!	#DIV/0!	#DIV/0!	#DIV/0!
CC_0066	67351	67450	-	1.40252	7.98558	1.50197	3.47373	1	5.69375	1.07091	2.47678
CC_0066	67401	67500	-	1.75315	18.7769	2.83706	6.75447	1	10.7104	1.61827	3.85277
CC_0066	67451	67550	-	1.75315	19.4244	2.83706	6.75447	1	11.0797	1.61827	3.85277
CC_0066	67501	67600	-	0.350629	11.4388	1.33509	3.47373	1	32.6236	3.80769	9.90712
CC_0066	67551	67650	-	0	0.647479	0	0	#DIV/0!	#DIV/0!	#DIV/0!	#DIV/0!
CC_0066	67601	67700	-	0	0	0	0	#DIV/0!	#DIV/0!	#DIV/0!	#DIV/0!
CC_0066	67651	67750	-	3.68161	0.647479	5.50723	0	1	0.175869	1.49588	0
CC_0066	67701	67800	-	7.88916	0.647479	8.3443	0	1	0.082072	1.05769	0
CC_0066	67751	67850	-	7.88916	0.647479	8.3443	0	1	0.082072	1.05769	0
CC_0066	67801	67900	-	4.20755	0	2.83706	0	1	0	0.674278	0
CC_0066	67851	67950	-	15.7783	15.3237	79.6046	5.0176	1	0.971185	5.04519	0.318006
CC_0066	67901	68000	-	31.0307	32.5898	152.701	9.07029	1	1.05024	4.92095	0.2923
CC_0066	67951	68050	-	31.0307	32.5898	152.701	9.07029	1	1.05024	4.92095	0.2923
CC_0066	68001	68100	-	23.4922	17.9136	73.4298	4.05268	1	0.762535	3.12571	0.172512
CC_0066	68051	68150	-	17.5315	1.94244	10.8476	3.8597	1	0.110797	0.618749	0.220158
CC_0066	68101	68200	-	18.408	4.96401	24.6991	9.07029	1	0.269665	1.34176	0.492735
	68151	68250		10.1683	5.82731	30.2063	9.07029	1	0.573089	2.97065	0.89202
CC_0067	68201	68300	-	0.876573	4.53235	22.5296	6.17551	1	5.17054	25.7019	7.04506
CC_0067	68251	68350	-	0.876573	1.72661	11.1814	2.89477	1	1.96973	12.7558	3.30237
CC_0067	68301	68400	-	5.08413	7.3381	18.5243	2.89477	1	1.44334	3.64356	0.569375
CC_0067	68351	68450	-	12.798	14.0287	27.5362	1.92985	1	1.09617	2.1516	0.150793
CC_0067	68401	68500	-	19.9859	16.187	38.3838	3.8597	1	0.809921	1.92054	0.193121
CC_0067	68451	68550	-	28.7516	20.7193	56.4074	16.2107	1	0.720632	1.96189	0.56382
CC_0067	68501	68600	-	27.5244	22.4459	60.5796	26.0529	1	0.815493	2.20094	0.94654
CC_0067	68551	68650	-	20.5118	24.3884	49.3982	30.6846	1	1.18899	2.40828	1.49595
CC_0067	68601	68700	-	10.3436	16.187	19.3588	24.5091	1	1.56493	1.87158	2.3695
CC_0067	68651	68750	-	5.08413	14.4604	25.1998	20.0704	1	2.84422	4.95656	3.94766
CC_0067	68701	68800	-	7.71385	16.6186	39.0513	20.0704	1	2.15439	5.06249	2.60187
CC_0067	68751	68850	-	4.90881	13.1654	37.8831	13.8949	1	2.682	7.71737	2.8306
CC_0067	68801	68900	-	3.68161	6.47479	16.021	8.49133	1	1.75869	4.35164	2.30642
CC_0067	68851	68950	-	0	0	0	0	#DIV/0!	#DIV/0!	#DIV/0!	#DIV/0!
CC_0067	68901	69000	-	0	0.431653	0	0	#DIV/0!	#DIV/0!	#DIV/0!	#DIV/0!
CC_0067	68951	69050	-	0	0.431653	1.33509	0	#DIV/0!	#DIV/0!	#DIV/0!	#DIV/0!
CC_0067	69001	69100	-	7.71385	7.3381	3.5046	55.7726	1	0.951289	0.454326	7.23019
CC_0067	69051	69150	-	18.5834	10.5755	7.34298	120.037	1	0.569084	0.395137	6.45936
CC_0068	69101	69200	-	18.5834	10.5755	6.00789	120.037	1	0.569084	0.323294	6.45936
CC_0068	69151	69250	-	11.9214	3.66905	8.17741	64.2639	1	0.30777	0.685944	5.39064
CC_0068	69201	69300	-	1.2272	1.51079	9.34561	36.0882	1	1.23108	7.61538	29.4068
CC_0068	69251	69350	-	2.27909	3.2374	11.1814	36.0882	1	1.42048	4.90606	15.8345
CC_0068	69301	69400	-	1.2272	3.2374	6.84232	36.0882	1	2.63803	5.57554	29.4068
CC_0068	69351	69450	-	1.40252	28.4891	3.5046	0	1	20.3128	2.4988	0
CC_0068	69401	69500	-	0.701259	52.23	3.00395	0	1	74.4804	4.28365	0
CC_0068	69451	69550	-	0.701259	52.6616	3.00395	0	1	75.0959	4.28365	0
CC_0069	69501	69600	-	0.350629	25.8992	1.33509	0	1	73.8648	3.80769	0
CC_0069	69551	69650	-	1.75315	42.302	1.66886	17.1756	1	24.1292	0.951922	9.79704
CC_0069	69601	69700	-	2.62972	76.8342	2.83706	34.1583	1	29.2176	1.07884	12.9893
CC_0069	69651	69750	-	2.62972	76.8342	2.83706	34.1583	1	29.2176	1.07884	12.9893
CC_0069	69701	69800	-	1.05189	34.9639	1.1682	16.9827	1	33.2392	1.11058	16.1449
CC_0069	69751	69850	-	0.175315	0	0	0	1	0	0	0
gpsA	69801	69900	-	0.175315	0.215826	0	0	1	1.23108	0	0
gpsA	69851	69950	-	0	0.215826	0	0	#DIV/0!	#DIV/0!	#DIV/0!	#DIV/0!
gpsA	69901	70000	-	0	0.215826	0	0	#DIV/0!	#DIV/0!	#DIV/0!	#DIV/0!
gpsA	69951	70050	-	0	0	0	0	#DIV/0!	#DIV/0!	#DIV/0!	#DIV/0!
gpsA	70001	70100	-	0	0	0	0	#DIV/0!	#DIV/0!	#DIV/0!	#DIV/0!
gpsA	70051	70150	-	0.350629	0	0	0	1	0	0	0
gpsA	70101	70200	-	0.350629	0	0	0	1	0	0	0
gpsA	70151	70250	-	0.350629	0	0	0	1	0	0	0
gpsA	70201	70300	-	0	0	0.333772	0	#DIV/0!	#DIV/0!	#DIV/0!	#DIV/0!
gpsA	70251	70350	-	0.175315	0.215826	0.333772	0	1	1.23108	1.90384	0
gpsA	70301	70400	-	0.175315	0.215826	0.333772	0	1	1.23108	1.90384	0
gpsA	70351	70450	-	0	0.215826	0	0	#DIV/0!	#DIV/0!	#DIV/0!	#DIV/0!
gpsA	70401	70500	-	0	0.215826	0	0	#DIV/0!	#DIV/0!	#DIV/0!	#DIV/0!
gpsA	70451	70550	-	0	0.215826	0	0	#DIV/0!	#DIV/0!	#DIV/0!	#DIV/0!
gpsA	70501	70600	-	0	0.215826	0	0	#DIV/0!	#DIV/0!	#DIV/0!	#DIV/0!
gpsA	70551	70650	-	0	0.215826	0	0	#DIV/0!	#DIV/0!	#DIV/0!	#DIV/0!
gpsA	70601	70700	-	0.175315	0.431653	0	0	1	2.46216	0	0
gpsA	70651	70750	-	0.350629	0.431653	0	0	1	1.23108	0	0
gpsA	70701	70800	-	0.350629	0.215826	4.00526	0	1	0.61554	11.4231	0
gpsA	70751	70850	-	0.175315	0	9.5125	0	1	0	54.2596	0
gpsA	70801	70900	-	0	0	9.5125	0	#DIV/0!	#DIV/0!	#DIV/0!	#DIV/0!
CC_0071	70851	70950	-	0	0	5.50723	0.192985	#DIV/0!	#DIV/0!	#DIV/0!	#DIV/0!
CC_0071	70901	71000	-	0	0	0	0.192985	#DIV/0!	#DIV/0!	#DIV/0!	#DIV/0!
CC_0071	70951	71050	-	0	0	0	0.192985	#DIV/0!	#DIV/0!	#DIV/0!	#DIV/0!
CC_0071	71001	71100	-	0	0	0	0	#DIV/0!	#DIV/0!	#DIV/0!	#DIV/0!
CC_0071	71051	71150	-	0	0.215826	0	0	#DIV/0!	#DIV/0!	#DIV/0!	#DIV/0!
CC_0071	71101	71200	-	0	0.215826	0	0	#DIV/0!	#DIV/0!	#DIV/0!	#DIV/0!
CC_0071	71151	71250	-	0.525944	0.215826	0	0	1	0.41036	0	0
CC_0071	71201	71300	-	0.525944	0	0	0	1	0	0	0
CC_0071	71251	71350	-	0.525944	0	0	0	1	0	0	0
CC_0071	71301	71400	-	0	0	0	0	#DIV/0!	#DIV/0!	#DIV/0!	#DIV/0!
CC_0071	71351	71450	-	0	0	0	0	#DIV/0!	#DIV/0!	#DIV/0!	#DIV/0!
CC_0071	71401	71500	-	0.175315	0	0	0	1	0	0	0
CC_0071	71451	71550	-	0.175315	0	0	0	1	0	0	0
CC_0071	71501	71600	-	0.175315	0	0	0	1	0	0	0
CC_0071	71551	71650	-	0	0	0	0	#DIV/0!	#DIV/0!	#DIV/0!	#DIV/0!
CC_0071	71601	71700	-	0	0	0	0	#DIV/0!	#DIV/0!	#DIV/0!	#DIV/0!
CC_0071	71651	71750	-	0.350629	2.37409	1.50197	0	1	6.77094	4.28365	0
CC_0071	71701	71800	-	0.350629	2.37409	1.50197	0	1	6.77094	4.28365	0
CC_0071	71751	71850	-	0.350629	2.37409	1.83574	2.31582	1	6.77094	5.23557	6.60474
CC_0071	71801	71900	-	2.45441	3.2374	3.00395	5.59656	1	1.31901	1.2239	2.28021
CC_0071	71851	71950	-	2.45441	5.39566	35.8805	5.59656	1	2.19836	14.6188	2.28021
CC_0071	71901	72000	-	2.62972	6.47479	70.9265	3.28074	1	2.46216	26.9711	1.24756
CC_0072	71951	72050	+	0.350629	3.2374	68.2563	0	1	9.2331	194.668	0
CC_0072	72001	72100	+	0.350629	1.07913	35.3798	0	1	3.0777	100.904	0
CC_0072	72051	72150	+	0	0	0	0	#DIV/0!	#DIV/0!	#DIV/0!	#DIV/0!
CC_0072	72101	72200	+	0	0	0.333772	0	#DIV/0!	#DIV/0!	#DIV/0!	#DIV/0!
CC_0072	72151	72250	+	0	0	0.333772	0	#DIV/0!	#DIV/0!	#DIV/0!	#DIV/0!
CC_0072	72201	72300	+	0	0	0.333772	0	#DIV/0!	#DIV/0!	#DIV/0!	#DIV/0!
CC_0072	72251	72350	+	0	0	0	0	#DIV/0!	#DIV/0!	#DIV/0!	#DIV/0!
CC_0072	72301	72400	+	0	0	0.166886	0	#DIV/0!	#DIV/0!	#DIV/0!	#DIV/0!
CC_0072	72351	72450	+	0	0	0.166886	0	#DIV/0!	#DIV/0!	#DIV/0!	#DIV/0!
CC_0072	72401	72500	+	0	0	0.166886	0	#DIV/0!	#DIV/0!	#DIV/0!	#DIV/0!
CC_0072	72451	72550	+	0	0	0	0	#DIV/0!	#DIV/0!	#DIV/0!	#DIV/0!
CC_0072	72501	72600	+	0	0	0	0	#DIV/0!	#DIV/0!	#DIV/0!	#DIV/0!
CC_0072	72551	72650	+	0	0	0	0	#DIV/0!	#DIV/0!	#DIV/0!	#DIV/0!
CC_0072	72601	72700	+	0	0	0	0	#DIV/0!	#DIV/0!	#DIV/0!	#DIV/0!
CC_0072	72651	72750	+	0	0	0	0	#DIV/0!	#DIV/0!	#DIV/0!	#DIV/0!
CC_0072	72701	72800	+	0	0	0	0	#DIV/0!	#DIV/0!	#DIV/0!	#DIV/0!
CC_0072	72751	72850	+	0	0	0	0	#DIV/0!	#DIV/0!	#DIV/0!	#DIV/0!
CC_0072	72801	72900	+	0.350629	0	0	0	1	0	0	0
CC_0072	72851	72950	+	1.05189	0	0	0	1	0	0	0
CC_0072	72901	73000	+	1.05189	0	0	0	1	0	0	0
CC_0073	72951	73050	+	0.701259	0	0.166886	0	1	0	0.237981	0
CC_0073	73001	73100	+	0	0	0.166886	0	#DIV/0!	#DIV/0!	#DIV/0!	#DIV/0!
CC_0073	73051	73150	+	0	0	0.166886	0	#DIV/0!	#DIV/0!	#DIV/0!	#DIV/0!
CC_0073	73101	73200	+	0	0.215826	0	0	#DIV/0!	#DIV/0!	#DIV/0!	#DIV/0!
CC_0073	73151	73250	+	0	0.215826	0	0	#DIV/0!	#DIV/0!	#DIV/0!	#DIV/0!
CC_0073	73201	73300	+	0.350629	0.215826	0	0	1	0.61554	0	0
CC_0073	73251	73350	+	0.350629	0	0	0	1	0	0	0
CC_0073	73301	73400	+	0.350629	0	0	0	1	0	0	0
CC_0073	73351	73450	+	0.175315	0	0	0	1	0	0	0
CC_0073	73401	73500	+	0.175315	0	0	0	1	0	0	0
CC_0073	73451	73550	+	0.175315	0	0	0	1	0	0	0
CC_0073	73501	73600	+	0	0	0	0	#DIV/0!	#DIV/0!	#DIV/0!	#DIV/0!
CC_0073	73551	73650	+	0	0	0	0	#DIV/0!	#DIV/0!	#DIV/0!	#DIV/0!
CC_0073	73601	73700	+	0	1.29496	2.50329	19.6844	#DIV/0!	#DIV/0!	#DIV/0!	#DIV/0!
CC_0074	73651	73750	+	0.525944	1.72661	3.83838	30.1056	1	3.28288	7.29807	57.2411
CC_0074	73701	73800	+	0.525944	1.72661	3.83838	30.1056	1	3.28288	7.29807	57.2411
CC_0074	73751	73850	+	0.525944	0.431653	1.33509	10.4212	1	0.82072	2.53846	19.8142
CC_0074	73801	73900	+	0.350629	0	0	0	1	0	0	0
CC_0074	73851	73950	+	0.350629	0	0	0	1	0	0	0
CC_0074	73901	74000	+	0.350629	0	0	0	1	0	0	0
CC_0074	73951	74050	+	0	0	0	0	#DIV/0!	#DIV/0!	#DIV/0!	#DIV/0!
CC_0074	74001	74100	+	0	0	0	0	#DIV/0!	#DIV/0!	#DIV/0!	#DIV/0!
CC_0074	74051	74150	+	0	0	0	0	#DIV/0!	#DIV/0!	#DIV/0!	#DIV/0!
CC_0074	74101	74200	+	0	0	0	0	#DIV/0!	#DIV/0!	#DIV/0!	#DIV/0!
CC_0074	74151	74250	+	0.876573	1.29496	0.500658	1.15791	1	1.4773	0.571153	1.32095
CC_0074	74201	74300	+	1.2272	3.2374	3.33772	1.15791	1	2.63803	2.71978	0.943535
CC_0074	74251	74350	+	1.2272	6.69062	5.34035	1.15791	1	5.45193	4.35164	0.943535
CC_0074	74301	74400	+	0.350629	5.39566	4.83969	0	1	15.3885	13.8029	0
CC_0074	74351	74450	+	0	3.45322	2.3364	0.192985	#DIV/0!	#DIV/0!	#DIV/0!	#DIV/0!
CC_0074	74401	74500	+	0	0	0.333772	0.192985	#DIV/0!	#DIV/0!	#DIV/0!	#DIV/0!
CC_0074	74451	74550	+	0	0.215826	0.333772	0.192985	#DIV/0!	#DIV/0!	#DIV/0!	#DIV/0!
CC_0074	74501	74600	+	0	0.431653	0	0	#DIV/0!	#DIV/0!	#DIV/0!	#DIV/0!
CC_0074	74551	74650	+	0.525944	0.431653	0	0	1	0.82072	0	0
CC_0075	74601	74700	+	0.525944	0.215826	0	0	1	0.41036	0	0
CC_0075	74651	74750	+	4.55818	6.25897	0.83443	2.89477	1	1.37313	0.183062	0.635072
CC_0075	74701	74800	+	4.03224	6.25897	0.83443	2.89477	1	1.55223	0.20694	0.717907
CC_0075	74751	74850	+	4.03224	6.25897	0.83443	2.89477	1	1.55223	0.20694	0.717907
CC_0075	74801	74900	+	0	0	0	0	#DIV/0!	#DIV/0!	#DIV/0!	#DIV/0!
CC_0075	74851	74950	+	1.2272	6.25897	0.667544	1.92985	1	5.10019	0.543955	1.57256
CC_0075	74901	75000	+	4.55818	17.4819	1.66886	10.4212	1	3.83529	0.366124	2.28626
CC_0075	74951	75050	+	4.55818	17.4819	1.66886	10.4212	1	3.83529	0.366124	2.28626
CC_0075	75001	75100	+	4.20755	13.3812	1.33509	8.49133	1	3.18029	0.317307	2.01812
CC_0075	75051	75150	+	2.45441	3.02157	0.83443	0	1	1.23108	0.339972	0
CC_0075	75101	75200	+	2.45441	3.02157	0.83443	0	1	1.23108	0.339972	0
CC_0075	75151	75250	+	1.57783	1.29496	0.667544	0	1	0.82072	0.423076	0
CC_0075	75201	75300	+	0	0.431653	0.166886	0	#DIV/0!	#DIV/0!	#DIV/0!	#DIV/0!
CC_0075	75251	75350	+	1.2272	3.88488	6.00789	15.4388	1	3.16563	4.8956	12.5805
CC_0075	75301	75400	+	1.2272	3.88488	9.34561	39.7549	1	3.16563	7.61538	32.3947
CC_0075	75351	75450	+	4.7335	4.31653	9.34561	41.1058	1	0.911911	1.97436	8.68402
CC_0075	75401	75500	+	4.38287	0.863306	3.5046	26.0529	1	0.196973	0.799614	5.94427
CC_0075	75451	75550	+	2.62972	0.431653	0	1.73686	1	0.164144	0	0.660474
CC_0075	75501	75600	+	0.876573	0	0	0.38597	1	0	0	0.440316
CC_0075	75551	75650	+	0	0	0	0	#DIV/0!	#DIV/0!	#DIV/0!	#DIV/0!
CC_0075	75601	75700	+	0	0	0	0	#DIV/0!	#DIV/0!	#DIV/0!	#DIV/0!
CC_0075	75651	75750	+	0	0	0	0	#DIV/0!	#DIV/0!	#DIV/0!	#DIV/0!
CC_0075	75701	75800	+	5.43476	0.431653	0.500658	0	1	0.0794245	0.0921215	0
CC_0075	75751	75850	+	27.1738	2.37409	2.3364	0.578954	1	0.087367	0.0859801	0.0213056
CC_0075	75801	75900	+	27.5244	4.74818	3.17083	0.578954	1	0.172508	0.115201	0.0210342
CC_0075	75851	75950	+	22.0896	6.47479	2.67017	0.578954	1	0.293114	0.120879	0.0262093
CC_0075	75901	76000	+	11.7461	18.3452	10.0132	21.4213	1	1.56182	0.852467	1.8237
CC_0075	75951	76050	+	32.4332	17.6978	20.0263	52.2989	1	0.545668	0.617463	1.61251
CC_0075	76001	76100	+	32.4332	15.5395	21.0276	52.2989	1	0.479123	0.648336	1.61251
CC_0075	76051	76150	+	21.0378	1.72661	11.8489	30.8776	1	0.082072	0.563221	1.46772
CC_0075	76101	76200	+	11.5708	15.3237	6.17478	7.71939	1	1.32434	0.533653	0.667146
	76151	76250		33.6604	33.4531	10.6807	11.3861	1	0.993841	0.317307	0.338264
	76201	76300		67.3208	47.4818	24.0316	19.8774	1	0.705306	0.356971	0.295264
	76251	76350		63.1133	34.5322	23.8647	12.737	1	0.547147	0.378125	0.201812
	76301	76400		42.6015	16.4028	18.5243	9.07029	1	0.385029	0.434829	0.21291
	76351	76450		13.1486	2.37409	6.00789	0.578954	1	0.180558	0.456923	0.0440316
CC_0076	76401	76500	-	14.7264	3.45322	5.84101	0	1	0.234491	0.396634	0
CC_0076	76451	76550	-	23.6675	8.41723	8.67807	12.158	1	0.355645	0.366666	0.513702
CC_0076	76501	76600	-	25.5959	9.06471	8.67807	21.6143	1	0.354146	0.339041	0.844442
CC_0076	76551	76650	-	16.6549	5.61149	3.83838	21.6143	1	0.336927	0.230465	1.29777
CC_0076	76601	76700	-	6.13601	0.647479	0.667544	9.45625	1	0.105521	0.108791	1.54111
CC_0076	76651	76750	-	0	5.17983	0.500658	5.98253	#DIV/0!	#DIV/0!	#DIV/0!	#DIV/0!
CC_0076	76701	76800	-	0	8.41723	0.500658	12.93	#DIV/0!	#DIV/0!	#DIV/0!	#DIV/0!
CC_0076	76751	76850	-	6.48664	26.115	17.3561	13.123	1	4.02596	2.67567	2.02307
CC_0076	76801	76900	-	15.603	43.3811	45.0592	7.14044	1	2.7803	2.88785	0.457632
CC_0076	76851	76950	-	15.603	40.1437	45.0592	0.192985	1	2.57282	2.88785	0.0123684
CC_0076	76901	77000	-	10.3436	28.0574	29.0381	1.54388	1	2.71255	2.80736	0.14926
CC_0076	76951	77050	-	2.45441	7.98558	2.50329	3.08776	1	3.25357	1.01992	1.25805
CC_0076	77001	77100	-	2.45441	7.98558	2.50329	3.08776	1	3.25357	1.01992	1.25805
CC_0076	77051	77150	-	3.85692	6.25897	15.3535	1.54388	1	1.62279	3.98076	0.400288
CC_0076	77101	77200	-	10.8695	13.8129	54.9055	0	1	1.27079	5.05133	0
CC_0076	77151	77250	-	13.8499	22.2301	84.2774	0.192985	1	1.60508	6.08507	0.0139341
CC_0076	77201	77300	-	11.2201	18.3452	70.7596	0.192985	1	1.63503	6.30648	0.0171999
CC_0076	77251	77350	-	2.98035	8.63306	29.5388	0.192985	1	2.89666	9.91119	0.0647524
CC_0076	77301	77400	-	0	0.215826	0.166886	0	#DIV/0!	#DIV/0!	#DIV/0!	#DIV/0!
CC_0076	77351	77450	-	1.57783	2.58992	33.8778	0	1	1.64144	21.4711	0
CC_0076	77401	77500	-	4.55818	4.74818	60.9134	0	1	1.04168	13.3635	0
CC_0076	77451	77550	-	5.9607	5.82731	61.7478	0	1	0.977622	10.3592	0
CC_0076	77501	77600	-	4.55818	5.17983	28.0368	0	1	1.13638	6.15088	0
CC_0076	77551	77650	-	11.9214	5.82731	13.6846	1.73686	1	0.488811	1.14791	0.145693
CC_0076	77601	77700	-	22.7909	7.3381	25.3667	2.70179	1	0.321975	1.11302	0.118547
CC_0076	77651	77750	-	36.1148	24.6042	31.7083	7.33342	1	0.681277	0.877986	0.203058
CC_0076	77701	77800	-	26.4725	21.5826	28.0368	5.59656	1	0.815285	1.05909	0.21141
CC_0076	77751	77850	-	22.4403	26.3308	47.7294	4.63163	1	1.17337	2.12695	0.206398
CC_0076	77801	77900	-	17.1808	17.2661	68.4232	4.05268	1	1.00496	3.98253	0.235884
CC_0076	77851	77950	-	26.2972	23.5251	76.1	7.91238	1	0.894585	2.89384	0.300883
CC_0076	77901	78000	-	21.0378	16.8345	53.0697	7.91238	1	0.800202	2.52259	0.376104
CC_0076	77951	78050	-	12.798	6.90645	25.7004	3.8597	1	0.539652	2.00816	0.301586
CC_0076	78001	78100	-	3.68161	2.37409	9.34561	0.38597	1	0.644852	2.53846	0.104837
CC_0076	78051	78150	-	0.701259	6.90645	3.5046	0.38597	1	9.84864	4.99759	0.550395
CC_0076	78101	78200	-	1.05189	7.55392	10.6807	0.578954	1	7.1813	10.1538	0.550395
CC_0076	78151	78250	-	0.701259	5.82731	10.5138	0.192985	1	8.30979	14.9928	0.275198
CC_0076	78201	78300	-	0.701259	0.863306	7.17609	0.192985	1	1.23108	10.2332	0.275198
CC_0076	78251	78350	-	0.350629	0.215826	0	0	1	0.61554	0	0
CC_0076	78301	78400	-	0	0.215826	0	0	#DIV/0!	#DIV/0!	#DIV/0!	#DIV/0!
CC_0076	78351	78450	-	0.175315	0	0	0	1	0	0	0
CC_0076	78401	78500	-	0.175315	0	0	0	1	0	0	0
CC_0076	78451	78550	-	0.175315	0	0	0	1	0	0	0
CC_0076	78501	78600	-	0	0.215826	0	0	#DIV/0!	#DIV/0!	#DIV/0!	#DIV/0!
CC_0076	78551	78650	-	3.33098	4.1007	3.5046	7.91238	1	1.23108	1.05212	2.37539
CC_0076	78601	78700	-	19.1093	10.3597	16.8555	21.6143	1	0.542127	0.882056	1.13109
CC_0076	78651	78750	-	28.5763	10.3597	21.5283	21.6143	1	0.362527	0.753362	0.756372
CC_0077	78701	78800	-	25.2453	6.47479	18.0237	13.7019	1	0.256475	0.713942	0.542751
CC_0077	78751	78850	-	9.46699	0.215826	4.67281	0	1	0.0227978	0.493589	0
CC_0077	78801	78900	-	3.15566	19.6402	3.67149	0	1	6.22379	1.16346	0
CC_0077	78851	78950	-	5.25944	42.0862	8.84495	0	1	8.00202	1.68173	0
CC_0077	78901	79000	-	5.25944	42.0862	8.84495	0	1	8.00202	1.68173	0
CC_0077	78951	79050	-	2.10378	22.4459	5.17346	0	1	10.6694	2.45913	0
CC_0077	79001	79100	-	0	0	0	0	#DIV/0!	#DIV/0!	#DIV/0!	#DIV/0!
CC_0077	79051	79150	-	0	0	0	0	#DIV/0!	#DIV/0!	#DIV/0!	#DIV/0!
CC_0077	79101	79200	-	0	0.215826	0	0.192985	#DIV/0!	#DIV/0!	#DIV/0!	#DIV/0!
CC_0077	79151	79250	-	0.175315	0.215826	0	0.192985	1	1.23108	0	1.10079
CC_0077	79201	79300	-	0.175315	0.215826	0	0.192985	1	1.23108	0	1.10079
CC_0077	79251	79350	-	0.175315	0	0	0	1	0	0	0
CC_0077	79301	79400	-	5.43476	4.74818	6.17478	21.8073	1	0.87367	1.13616	4.01256
CC_0077	79351	79450	-	11.5708	8.84888	13.0171	47.6672	1	0.764762	1.125	4.11963
CC_0077	79401	79500	-	14.2005	10.5755	15.0197	47.6672	1	0.744728	1.05769	3.35673
CC_0077	79451	79550	-	8.76573	5.82731	8.84495	25.86	1	0.664783	1.00904	2.95012
CC_0077	79501	79600	-	2.62972	1.72661	2.00263	0	1	0.656576	0.761538	0
CC_0077	79551	79650	-	2.27909	1.29496	0.166886	0	1	0.568191	0.0732248	0
CC_0077	79601	79700	-	4.55818	1.51079	0.166886	0	1	0.331445	0.0366124	0
CC_0077	79651	79750	-	4.7335	1.51079	0.166886	0	1	0.319169	0.0352564	0
CC_0077	79701	79800	-	2.45441	0.215826	0	0	1	0.0879343	0	0
CC_0077	79751	79850	-	32.6085	3.88488	18.8581	15.0528	1	0.119137	0.578318	0.461622
CC_0077	79801	79900	-	73.4569	11.0071	39.552	29.1407	1	0.149845	0.538438	0.396705
CC_0077	79851	79950	-	75.3853	15.3237	42.7228	29.1407	1	0.203271	0.566726	0.386557
CC_0077	79901	80000	-	43.1274	15.9712	25.7004	14.0879	1	0.370325	0.595919	0.326657
CC_0078	79951	80050	-	15.2524	11.223	23.5309	1.54388	1	0.735818	1.54277	0.101222
CC_0078	80001	80100	-	22.6156	10.1438	32.0421	1.73686	1	0.448533	1.41681	0.0767994
CC_0078	80051	80150	-	20.3365	3.88488	14.0184	0.964924	1	0.19103	0.689323	0.0474479
CC_0078	80101	80200	-	9.29168	3.66905	11.682	0.192985	1	0.394875	1.25726	0.0207696
CC_0078	80151	80250	-	0	0.431653	0	0	#DIV/0!	#DIV/0!	#DIV/0!	#DIV/0!
CC_0078	80201	80300	-	0	20.2877	1.33509	1.54388	#DIV/0!	#DIV/0!	#DIV/0!	#DIV/0!
CC_0078	80251	80350	-	18.408	24.6042	7.17609	25.86	1	1.3366	0.389835	1.40482
CC_0078	80301	80400	-	37.6927	47.266	15.0197	55.0007	1	1.25398	0.398479	1.45919
CC_0078	80351	80450	-	48.0362	33.0214	15.8542	54.2287	1	0.687428	0.330046	1.12891
CC_0079	80401	80500	-	36.4655	29.9999	12.0158	34.9302	1	0.822693	0.329511	0.9579
CC_0079	80451	80550	-	20.3365	9.28054	7.67675	9.07029	1	0.456349	0.377486	0.44601
CC_0079	80501	80600	-	8.41511	5.17983	5.67412	8.29835	1	0.61554	0.674278	0.986125
CC_0079	80551	80650	-	16.3043	9.71219	3.67149	3.28074	1	0.595684	0.225186	0.20122
CC_0079	80601	80700	-	25.5959	12.7338	0.500658	0.192985	1	0.497491	0.01956	0.00753966
CC_0079	80651	80750	-	25.07	10.7913	0.333772	0.192985	1	0.430448	0.0133136	0.00769784
CC_0079	80701	80800	-	12.4473	4.96401	0.333772	0.192985	1	0.398801	0.0268147	0.0155041
CC_0079	80751	80850	-	0	1.29496	0.333772	0	#DIV/0!	#DIV/0!	#DIV/0!	#DIV/0!
CC_0079	80801	80900	-	0.175315	1.51079	0.667544	0	1	8.61756	3.80769	0
CC_0079	80851	80950	-	0.175315	0.215826	0.333772	0.38597	1	1.23108	1.90384	2.20158
CC_0079	80901	81000	-	10.5189	19.856	8.3443	4.43865	1	1.88766	0.793268	0.42197
CC_0079	80951	81050	-	17.7068	21.3668	12.0158	4.43865	1	1.2067	0.678598	0.250675
CC_0079	81001	81100	-	25.5959	21.7985	16.8555	4.24566	1	0.851638	0.658521	0.165873
CC_0079	81051	81150	-	15.0771	2.15826	8.84495	0.192985	1	0.143149	0.58665	0.0127999
CC_0079	81101	81200	-	41.5496	4.31653	13.184	56.5445	1	0.103889	0.317307	1.36089
CC_0079	81151	81250	-	50.4906	7.98558	18.1906	117.142	1	0.15816	0.360276	2.32007
CC_0079	81201	81300	-	53.2957	8.84888	20.0263	117.142	1	0.166034	0.375759	2.19796
CC_0079	81251	81350	-	22.6156	6.47479	11.8489	60.7902	1	0.286298	0.523926	2.68798
CC_0079	81301	81400	-	5.9607	2.37409	2.00263	0	1	0.398291	0.335972	0
CC_0079	81351	81450	-	3.15566	1.51079	0.166886	0	1	0.478753	0.0528846	0
CC_0079	81401	81500	-	0.175315	0	0	0	1	0	0	0
CC_0079	81451	81550	-	0	0	0	0	#DIV/0!	#DIV/0!	#DIV/0!	#DIV/0!
CC_0079	81501	81600	-	57.3279	1.07913	0.500658	0	1	0.0188239	0.00873323	0
CC_0080	81551	81650	-	109.396	2.37409	1.00132	0.192985	1	0.0217017	0.0091531	0.00176409
CC_0080	81601	81700	-	118.162	12.7338	56.2405	0.192985	1	0.107765	0.475961	0.00163322
CC_0080	81651	81750	-	71.7037	27.1941	114.317	2.5088	1	0.379257	1.59429	0.0349885
CC_0080	81701	81800	-	24.0181	29.9999	127	4.43865	1	1.24905	5.28768	0.184804
CC_0080	81751	81850	-	19.6352	23.0934	75.5993	4.43865	1	1.17612	3.85018	0.226055
CC_0080	81801	81900	-	12.6227	11.223	20.3601	2.12283	1	0.889113	1.61298	0.168176
CC_0080	81851	81950	-	8.23979	7.12227	7.17609	0.192985	1	0.864375	0.870907	0.0234211
CC_0080	81901	82000	-	12.9733	9.92802	11.1814	17.9476	1	0.765266	0.861875	1.38343
CC_0080	81951	82050	-	20.5118	11.6546	14.0184	40.1408	1	0.568191	0.683431	1.95696
CC_0080	82001	82100	-	21.0378	11.8705	14.686	52.8778	1	0.564245	0.698076	2.51347
CC_0080	82051	82150	-	26.6478	27.41	31.0408	83.9484	1	1.0286	1.16485	3.15029
CC_0080	82101	82200	-	33.1345	41.007	41.8884	104.791	1	1.23759	1.26419	3.16259
CC_0080	82151	82250	-	32.7838	40.7912	41.2208	91.8608	1	1.24425	1.25735	2.80201
CC_0080	82201	82300	-	18.2327	18.9927	17.0224	43.0356	1	1.04168	0.933616	2.36035
CC_0080	82251	82350	-	1.2272	0.863306	0	0.38597	1	0.703474	0	0.314512
CC_0080	82301	82400	-	1.05189	1.07913	0	0.38597	1	1.0259	0	0.36693
CC_0080	82351	82450	-	0.876573	1.07913	1.50197	0.38597	1	1.23108	1.71346	0.440316
CC_0080	82401	82500	-	1.2272	0.863306	9.17872	0	1	0.703474	7.47939	0
CC_0080	82451	82550	-	5.43476	0.863306	16.3548	0	1	0.158849	3.0093	0
CC_0080	82501	82600	-	7.71385	1.29496	15.1866	0.38597	1	0.167875	1.96875	0.0500359
CC_0080	82551	82650	-	6.48664	0.647479	7.67675	0.38597	1	0.0998173	1.18347	0.0595022
CC_0080	82601	82700	-	2.27909	0.431653	0.500658	1.15791	1	0.189397	0.219674	0.508057
CC_0080	82651	82750	-	26.1219	1.51079	4.83969	1.54388	1	0.057836	0.185273	0.0591029
CC_0080	82701	82800	-	55.0488	3.2374	10.3469	1.54388	1	0.0588096	0.187959	0.0280456
CC_0080	82751	82850	-	55.0488	3.2374	10.3469	0.771939	1	0.0588096	0.187959	0.0140228
CC_0080	82801	82900	-	30.3294	4.1007	10.0132	0	1	0.135205	0.330146	0
CC_0080	82851	82950	-	2.10378	4.31653	7.34298	0.192985	1	2.0518	3.49038	0.0917326
CC_0080	82901	83000	-	2.45441	22.2301	7.84364	0.192985	1	9.05723	3.19574	0.0786279
CC_0080	82951	83050	-	4.90881	32.8056	10.6807	11.7721	1	6.68301	2.17582	2.39815
CC_0080	83001	83100	-	10.8695	31.2948	15.1866	23.5441	1	2.87914	1.39718	2.16607
CC_0080	83051	83150	-	10.5189	13.3812	14.686	23.5441	1	1.27212	1.39615	2.23827
CC_0080	83101	83200	-	6.66196	0.431653	7.50987	11.9651	1	0.0647937	1.12728	1.79603
CC_0080	83151	83250	-	0.350629	0.647479	0	1.54388	1	1.84662	0	4.40316
CC_0080	83201	83300	-	11.9214	21.151	6.00789	3.08776	1	1.7742	0.503959	0.25901
CC_0080	83251	83350	-	17.3562	29.1366	7.50987	3.08776	1	1.67875	0.432692	0.177906
CC_0080	83301	83400	-	18.934	29.1366	9.5125	1.54388	1	1.53885	0.502403	0.0815401
CC_0081	83351	83450	-	9.29168	10.3597	7.34298	0	1	1.11494	0.790275	0
CC_0081	83401	83500	-	4.20755	2.37409	6.00789	0	1	0.564245	1.42788	0
CC_0081	83451	83550	-	2.27909	1.72661	4.33903	0	1	0.757588	1.90384	0
CC_0081	83501	83600	-	0.350629	0	1.1682	0	1	0	3.33173	0
CC_0081	83551	83650	-	10.5189	3.88488	1.66886	1.92985	1	0.369324	0.158654	0.183465
CC_0081	83601	83700	-	19.4599	5.82731	1.66886	3.47373	1	0.299452	0.0857587	0.178507
CC_0081	83651	83750	-	25.7713	6.25897	1.1682	3.66671	1	0.242866	0.0453296	0.142279
CC_0081	83701	83800	-	21.739	3.45322	3.5046	2.12283	1	0.158849	0.161213	0.0976508
CC_0081	83751	83850	-	14.7264	2.58992	3.83838	0.578954	1	0.175869	0.260645	0.039314
CC_0081	83801	83900	-	8.41511	2.15826	4.17215	0.38597	1	0.256475	0.495793	0.0458663
CC_0081	83851	83950	-	3.33098	4.1007	3.67149	0	1	1.23108	1.10223	0
	83901	84000		15.2524	4.1007	6.34166	1.92985	1	0.268857	0.415782	0.126528
	83951	84050		24.8947	4.31653	7.34298	3.08776	1	0.173392	0.294962	0.124033
CC_0082	84001	84100	+	26.2972	1.72661	5.50723	3.08776	1	0.0656576	0.209423	0.117418
CC_0082	84051	84150	+	12.4473	0.647479	2.16952	1.15791	1	0.0520175	0.174296	0.0930246
CC_0082	84101	84200	+	2.80503	0.431653	0.667544	0	1	0.153885	0.23798	0
CC_0082	84151	84250	+	0.350629	0.863306	2.16952	0	1	2.46216	6.18749	0
CC_0082	84201	84300	+	0.350629	1.07913	4.83969	0	1	3.0777	13.8029	0
CC_0082	84251	84350	+	0.701259	1.07913	4.83969	0	1	1.53885	6.90143	0
CC_0082	84301	84400	+	0.350629	0.215826	2.67017	0	1	0.61554	7.61538	0
CC_0082	84351	84450	+	0.350629	0	0	0	1	0	0	0
CC_0082	84401	84500	+	0	0	0	0	#DIV/0!	#DIV/0!	#DIV/0!	#DIV/0!
CC_0082	84451	84550	+	0.350629	0.215826	0	0	1	0.61554	0	0
CC_0082	84501	84600	+	0.701259	0.215826	0	0	1	0.30777	0	0
CC_0082	84551	84650	+	0.701259	0.215826	0	0	1	0.30777	0	0
CC_0082	84601	84700	+	0.876573	0.647479	0.500658	0	1	0.738648	0.571153	0
CC_0082	84651	84750	+	3.15566	1.51079	2.00263	0	1	0.478753	0.634615	0
CC_0082	84701	84800	+	3.15566	1.51079	2.00263	0	1	0.478753	0.634615	0
CC_0083	84751	84850	-	3.15566	1.29496	1.50197	13.7019	1	0.41036	0.475961	4.34201
CC_0083	84801	84900	-	0.876573	1.94244	0	43.4216	1	2.21594	0	49.5356
CC_0083	84851	84950	-	4.55818	5.82731	5.00658	29.7197	1	1.27843	1.09837	6.52007
CC_0083	84901	85000	-	13.4992	13.8129	15.8542	31.4565	1	1.02324	1.17445	2.33025
CC_0083	84951	85050	-	19.8106	13.3812	19.5256	3.28074	1	0.67546	0.985618	0.165606
	85001	85100		15.603	9.06471	14.5191	3.66671	1	0.580959	0.930531	0.235
	85051	85150		6.66196	1.07913	3.67149	1.92985	1	0.161984	0.551113	0.289682
	85101	85200		0	0	0	0.38597	#DIV/0!	#DIV/0!	#DIV/0!	#DIV/0!
lysS	85151	85250	-	0	0	0	0	#DIV/0!	#DIV/0!	#DIV/0!	#DIV/0!
lysS	85201	85300	-	0	0	0	0	#DIV/0!	#DIV/0!	#DIV/0!	#DIV/0!
lysS	85251	85350	-	0.175315	0	0.166886	0	1	0	0.951922	0
lysS	85301	85400	-	0.175315	0.431653	0.166886	0	1	2.46216	0.951922	0
lysS	85351	85450	-	0.175315	0.431653	0.166886	0	1	2.46216	0.951922	0
lysS	85401	85500	-	0	0.431653	0	0	#DIV/0!	#DIV/0!	#DIV/0!	#DIV/0!
lysS	85451	85550	-	0	0.215826	0	0	#DIV/0!	#DIV/0!	#DIV/0!	#DIV/0!
lysS	85501	85600	-	0	0.215826	0	0	#DIV/0!	#DIV/0!	#DIV/0!	#DIV/0!
lysS	85551	85650	-	0	0.215826	0	0	#DIV/0!	#DIV/0!	#DIV/0!	#DIV/0!
lysS	85601	85700	-	0	0	0	0	#DIV/0!	#DIV/0!	#DIV/0!	#DIV/0!
lysS	85651	85750	-	0	0	0	0	#DIV/0!	#DIV/0!	#DIV/0!	#DIV/0!
lysS	85701	85800	-	0	0	0	0	#DIV/0!	#DIV/0!	#DIV/0!	#DIV/0!
lysS	85751	85850	-	0	0	0	0	#DIV/0!	#DIV/0!	#DIV/0!	#DIV/0!
lysS	85801	85900	-	0	0	0	0	#DIV/0!	#DIV/0!	#DIV/0!	#DIV/0!
lysS	85851	85950	-	0	0	0	0	#DIV/0!	#DIV/0!	#DIV/0!	#DIV/0!
lysS	85901	86000	-	0	0	0	0	#DIV/0!	#DIV/0!	#DIV/0!	#DIV/0!
lysS	85951	86050	-	0	0	0	0	#DIV/0!	#DIV/0!	#DIV/0!	#DIV/0!
lysS	86001	86100	-	0	0	0	0	#DIV/0!	#DIV/0!	#DIV/0!	#DIV/0!
lysS	86051	86150	-	0	0	0	0	#DIV/0!	#DIV/0!	#DIV/0!	#DIV/0!
lysS	86101	86200	-	0	0	0	0	#DIV/0!	#DIV/0!	#DIV/0!	#DIV/0!
lysS	86151	86250	-	0	0	0	0	#DIV/0!	#DIV/0!	#DIV/0!	#DIV/0!
lysS	86201	86300	-	0.701259	0.647479	0	0	1	0.92331	0	0
lysS	86251	86350	-	0.701259	0.647479	0	0	1	0.92331	0	0
lysS	86301	86400	-	0.876573	0.647479	0	0	1	0.738648	0	0
lysS	86351	86450	-	0.175315	1.07913	0.500658	0.192985	1	6.1554	2.85577	1.10079
lysS	86401	86500	-	0.175315	1.07913	0.500658	0.192985	1	6.1554	2.85577	1.10079
lysS	86451	86550	-	0	1.07913	0.500658	0.192985	#DIV/0!	#DIV/0!	#DIV/0!	#DIV/0!
lysS	86501	86600	-	0	0.215826	0	0	#DIV/0!	#DIV/0!	#DIV/0!	#DIV/0!
lysS	86551	86650	-	0	0.215826	0	0	#DIV/0!	#DIV/0!	#DIV/0!	#DIV/0!
lysS	86601	86700	-	0	0.215826	0	0	#DIV/0!	#DIV/0!	#DIV/0!	#DIV/0!
lysS	86651	86750	-	0	0	0	0	#DIV/0!	#DIV/0!	#DIV/0!	#DIV/0!
lysS	86701	86800	-	0.175315	0	0	0	1	0	0	0
lysS	86751	86850	-	11.2201	22.4459	8.01052	2.31582	1	2.00051	0.713941	0.206398
lysS	86801	86900	-	38.3939	45.971	19.3588	16.2107	1	1.19735	0.504214	0.422221
lysS	86851	86950	-	49.6141	48.1293	21.3614	26.4389	1	0.970074	0.430551	0.532892
	86901	87000		38.5692	25.6833	13.3509	24.1231	1	0.665902	0.346153	0.625449
CC_0085	86951	87050	-	11.3955	2.15826	2.00263	10.2282	1	0.189397	0.175739	0.897568
CC_0085	87001	87100	-	11.2201	8.41723	22.1958	49.5971	1	0.75019	1.97821	4.42036
CC_0085	87051	87150	-	16.8302	16.187	42.8897	97.2643	1	0.961781	2.54837	5.77915
CC_0085	87101	87200	-	16.8302	16.187	42.8897	97.2643	1	0.961781	2.54837	5.77915
CC_0085	87151	87250	-	5.61007	7.76975	20.6939	47.8602	1	1.38497	3.6887	8.53113
CC_0085	87201	87300	-	1.57783	13.1654	0	0.192985	1	8.34399	0	0.12231
CC_0085	87251	87350	-	7.36322	23.9567	3.17083	0.192985	1	3.25357	0.430631	0.0262093
CC_0085	87301	87400	-	15.7783	29.9999	6.67544	1.15791	1	1.90133	0.423076	0.0733861
CC_0085	87351	87450	-	14.3758	21.3668	7.17609	1.15791	1	1.4863	0.499179	0.0805457
CC_0085	87401	87500	-	8.76573	10.5755	4.00526	1.15791	1	1.20646	0.456923	0.132095
CC_0085	87451	87550	-	1.05189	17.0503	11.3482	15.6318	1	16.2092	10.7884	14.8607
CC_0085	87501	87600	-	1.75315	23.3093	22.6965	40.3338	1	13.2957	12.9461	23.0065
CC_0085	87551	87650	-	6.83727	72.7335	27.8699	40.9128	1	10.6378	4.07618	5.98379
CC_0085	87601	87700	-	12.4473	120.647	33.2103	25.281	1	9.69259	2.66806	2.03104
CC_0085	87651	87750	-	12.6227	114.82	30.2063	0.771939	1	9.09631	2.39303	0.061155
CC_0085	87701	87800	-	7.88916	65.8271	27.0355	0.192985	1	8.34399	3.42692	0.024462
CC_0085	87751	87850	-	1.75315	5.39566	10.8476	0.192985	1	3.0777	6.18749	0.110079
CC_0085	87801	87900	-	0.701259	0.431653	2.00263	0	1	0.61554	2.85577	0
CC_0085	87851	87950	-	0.525944	6.25897	0.166886	1.73686	1	11.9004	0.317307	3.30237
CC_0085	87901	88000	-	0.701259	9.28054	0.166886	2.70179	1	13.2341	0.237981	3.85277
CC_0085	87951	88050	-	6.83727	18.7769	4.17215	15.0528	1	2.74626	0.610206	2.20158
CC_0085	88001	88100	-	11.3955	18.7769	7.00921	26.2459	1	1.64775	0.615088	2.30319
CC_0085	88051	88150	-	11.0448	16.187	7.00921	25.281	1	1.46557	0.634615	2.28895
CC_0085	88101	88200	-	8.76573	9.71219	13.0171	14.0879	1	1.10797	1.485	1.60715
CC_0085	88151	88250	-	7.01259	8.41723	22.0289	2.12283	1	1.2003	3.14134	0.302717
CC_0085	88201	88300	-	7.01259	7.98558	22.0289	2.12283	1	1.13875	3.14134	0.302717
CC_0085	88251	88350	-	3.15566	4.96401	12.0158	0.964924	1	1.57305	3.80769	0.305775
CC_0085	88301	88400	-	0	0	0	0	#DIV/0!	#DIV/0!	#DIV/0!	#DIV/0!
CC_0085	88351	88450	-	0	0	0	0	#DIV/0!	#DIV/0!	#DIV/0!	#DIV/0!
CC_0085	88401	88500	-	0	0	0	0	#DIV/0!	#DIV/0!	#DIV/0!	#DIV/0!
CC_0085	88451	88550	-	0	0	0	0	#DIV/0!	#DIV/0!	#DIV/0!	#DIV/0!
CC_0085	88501	88600	-	0.701259	4.53235	1.00132	2.89477	1	6.46317	1.42788	4.12797
CC_0085	88551	88650	-	3.15566	10.3597	4.67281	25.86	1	3.28288	1.48077	8.19478
CC_0085	88601	88700	-	9.29168	16.6186	9.67938	37.0531	1	1.78855	1.04173	3.98777
CC_0085	88651	88750	-	34.011	20.2877	19.025	36.2811	1	0.596503	0.559377	1.06675
	88701	88800		43.8287	21.3668	21.3614	15.8248	1	0.487508	0.487384	0.361059
	88751	88850		37.6927	15.3237	16.3548	4.63163	1	0.406543	0.433899	0.122879
	88801	88900		14.2005	8.63306	6.84232	2.5088	1	0.607941	0.481837	0.17667
	88851	88950		3.85692	1.72661	1.50197	0	1	0.447666	0.389423	0
	88901	89000		28.0503	3.88488	17.8568	18.1406	1	0.138497	0.636598	0.646715
	88951	89050		48.7375	5.17983	31.2077	26.4389	1	0.10628	0.640322	0.542476
purH	89001	89100	+	46.809	5.17983	30.707	26.4389	1	0.110659	0.656006	0.564825
purH	89051	89150	+	22.6156	2.80574	14.3522	8.29835	1	0.124062	0.634615	0.36693
purH	89101	89200	+	0.350629	0	0.166886	0	1	0	0.475961	0
purH	89151	89250	+	0.350629	0	0	0	1	0	0	0
purH	89201	89300	+	1.2272	0	0	0	1	0	0	0
purH	89251	89350	+	4.90881	6.04314	33.0434	0.771939	1	1.23108	6.73145	0.157256
purH	89301	89400	+	6.31133	10.7913	72.4285	1.54388	1	1.70983	11.4759	0.24462
purH	89351	89450	+	5.43476	11.223	72.9291	1.54388	1	2.06504	13.419	0.284075
purH	89401	89500	+	2.45441	15.5395	52.5691	1.54388	1	6.33127	21.4182	0.629023
purH	89451	89550	+	1.75315	23.3093	26.2011	1.35089	1	13.2957	14.9452	0.770553
purH	89501	89600	+	1.92846	28.4891	27.2024	1.35089	1	14.773	14.1058	0.700503
purH	89551	89650	+	1.92846	22.6618	16.5217	0.578954	1	11.7512	8.5673	0.300216
purH	89601	89700	+	1.40252	11.0071	3.5046	0	1	7.84814	2.4988	0
purH	89651	89750	+	16.4796	6.90645	5.00658	8.29835	1	0.419091	0.303805	0.503553
purH	89701	89800	+	30.6801	4.31653	7.00921	16.5967	1	0.140695	0.228461	0.54096
purH	89751	89850	+	31.206	4.1007	7.84364	20.2634	1	0.131407	0.25135	0.649343
purH	89801	89900	+	15.9536	2.58992	4.83969	11.9651	1	0.16234	0.30336	0.749989
purH	89851	89950	+	3.50629	9.06471	3.83838	4.05268	1	2.58527	1.09471	1.15583
purH	89901	90000	+	4.38287	16.187	4.50592	1.15791	1	3.69324	1.02808	0.26419
purH	89951	90050	+	4.38287	16.187	4.50592	1.15791	1	3.69324	1.02808	0.26419
purH	90001	90100	+	1.57783	7.76975	1.50197	0.771939	1	4.92432	0.951922	0.48924
purH	90051	90150	+	0.175315	0	0	0	1	0	0	0
purH	90101	90200	+	0.175315	0.863306	0	0	1	4.92432	0	0
purH	90151	90250	+	0	1.07913	0	0	#DIV/0!	#DIV/0!	#DIV/0!	#DIV/0!
purH	90201	90300	+	0.350629	1.29496	0	0	1	3.69324	0	0
purH	90251	90350	+	0.350629	0.431653	0	0	1	1.23108	0	0
purH	90301	90400	+	0.350629	0.647479	0	0	1	1.84662	0	0
purH	90351	90450	+	0.525944	0.431653	0	0	1	0.82072	0	0
purH	90401	90500	+	0.525944	0.431653	0	0	1	0.82072	0	0
purH	90451	90550	+	0.525944	0.215826	0	0	1	0.41036	0	0
purH	90501	90600	+	7.36322	2.80574	56.7412	9.84222	1	0.381049	7.70603	1.33667
purH	90551	90650	+	10.8695	4.1007	103.469	23.7371	1	0.377267	9.51922	2.18383
purH	90601	90700	+	11.0448	3.88488	103.469	23.7371	1	0.351737	9.36812	2.14916
CC_0087	90651	90750	+	12.798	1.94244	51.234	13.8949	1	0.151777	4.00329	1.08571
CC_0087	90701	90800	+	21.5637	1.07913	7.34298	0	1	0.0500439	0.340525	0
CC_0087	90751	90850	+	21.3884	1.07913	7.34298	0	1	0.0504541	0.343316	0
CC_0087	90801	90900	+	15.2524	5.61149	6.17478	1.35089	1	0.367909	0.40484	0.0885694
CC_0087	90851	90950	+	2.98035	5.17983	3.33772	1.35089	1	1.738	1.11991	0.453267
CC_0087	90901	91000	+	4.20755	7.12227	6.84232	4.05268	1	1.69274	1.6262	0.963192
CC_0087	90951	91050	+	2.98035	3.66905	7.34298	5.78954	1	1.23108	2.4638	1.94257
CC_0087	91001	91100	+	7.1879	19.856	12.3496	10.8071	1	2.76242	1.7181	1.50352
CC_0087	91051	91150	+	8.23979	26.9783	13.8515	11.7721	1	3.27415	1.68105	1.42869
CC_0087	91101	91200	+	6.48664	25.2517	10.0132	8.68431	1	3.89288	1.54366	1.3388
CC_0087	91151	91250	+	2.27909	9.06471	5.00658	3.66671	1	3.97734	2.19674	1.60885
CC_0087	91201	91300	+	0	0	0	0	#DIV/0!	#DIV/0!	#DIV/0!	#DIV/0!
CC_0087	91251	91350	+	0	0.647479	3.00395	6.17551	#DIV/0!	#DIV/0!	#DIV/0!	#DIV/0!
CC_0087	91301	91400	+	1.05189	3.02157	4.50592	9.45625	1	2.87252	4.28365	8.98979
CC_0087	91351	91450	+	2.45441	4.96401	5.84101	9.45625	1	2.02249	2.3798	3.85277
CC_0087	91401	91500	+	2.98035	4.31653	2.83706	3.28074	1	1.44833	0.951922	1.10079
CC_0088	91451	91550	-	2.27909	2.15826	1.50197	0	1	0.946985	0.659023	0
CC_0088	91501	91600	-	0.876573	0.215826	0.166886	0	1	0.246216	0.190384	0
CC_0088	91551	91650	-	0.350629	0.215826	0.166886	0.192985	1	0.61554	0.475961	0.550395
CC_0088	91601	91700	-	1.75315	1.72661	0.166886	0.192985	1	0.984864	0.0951922	0.110079
CC_0088	91651	91750	-	2.98035	2.80574	0.500658	0.192985	1	0.941414	0.167986	0.0647524
CC_0088	91701	91800	-	4.90881	4.1007	2.50329	0.771939	1	0.835376	0.509958	0.157256
CC_0088	91751	91850	-	4.7335	3.02157	4.00526	0.964924	1	0.638338	0.846153	0.20385
CC_0088	91801	91900	-	4.38287	3.45322	4.00526	1.15791	1	0.787891	0.913845	0.26419
CC_0088	91851	91950	-	4.38287	3.02157	2.67017	0.578954	1	0.689405	0.60923	0.132095
CC_0088	91901	92000	-	2.80503	2.37409	1.1682	0.771939	1	0.846368	0.416466	0.275198
CC_0088	91951	92050	-	1.92846	0.863306	0.83443	0.771939	1	0.447666	0.432692	0.400288
CC_0088	92001	92100	-	0.525944	0	0.166886	1.15791	1	0	0.317307	2.20158
CC_0088	92051	92150	-	1.05189	0.431653	0.166886	0.771939	1	0.41036	0.158654	0.73386
CC_0088	92101	92200	-	1.05189	0.431653	0.166886	0.578954	1	0.41036	0.158654	0.550395
CC_0088	92151	92250	-	0.525944	0.431653	0.166886	0	1	0.82072	0.317307	0
CC_0088	92201	92300	-	0.175315	0	0	0	1	0	0	0
CC_0088	92251	92350	-	0.525944	2.37409	0.83443	0	1	4.51396	1.58654	0
CC_0088	92301	92400	-	0.701259	4.53235	2.00263	0	1	6.46317	2.85577	0
CC_0088	92351	92450	-	0.876573	4.53235	2.00263	0.192985	1	5.17054	2.28461	0.220158
CC_0088	92401	92500	-	0.525944	2.15826	1.1682	0.192985	1	4.1036	2.22115	0.36693
CC_0088	92451	92550	-	0.350629	0	0	0.192985	1	0	0	0.550395
CC_0088	92501	92600	-	0.701259	0	0.500658	0	1	0	0.713942	0
CC_0088	92551	92650	-	0.876573	0.431653	1.33509	2.89477	1	0.492432	1.52308	3.30237
CC_0088	92601	92700	-	0.350629	1.07913	1.66886	3.66671	1	3.0777	4.75961	10.4575
CC_0088	92651	92750	-	0.350629	1.07913	1.1682	3.66671	1	3.0777	3.33173	10.4575
CC_0088	92701	92800	-	0.175315	0.647479	0.333772	0.771939	1	3.69324	1.90384	4.40316
CC_0088	92751	92850	-	0	0	0	0	#DIV/0!	#DIV/0!	#DIV/0!	#DIV/0!
CC_0088	92801	92900	-	0	0	0	0	#DIV/0!	#DIV/0!	#DIV/0!	#DIV/0!
CC_0088	92851	92950	-	0	0	0	0	#DIV/0!	#DIV/0!	#DIV/0!	#DIV/0!
CC_0088	92901	93000	-	0	0	0	0.578954	#DIV/0!	#DIV/0!	#DIV/0!	#DIV/0!
CC_0088	92951	93050	-	0	0.215826	0	1.15791	#DIV/0!	#DIV/0!	#DIV/0!	#DIV/0!
CC_0088	93001	93100	-	0	0.215826	0	1.15791	#DIV/0!	#DIV/0!	#DIV/0!	#DIV/0!
CC_0088	93051	93150	-	0.175315	0.215826	0	0.578954	1	1.23108	0	3.30237
CC_0088	93101	93200	-	0.701259	0	0	0	1	0	0	0
CC_0088	93151	93250	-	1.2272	0	0	0	1	0	0	0
CC_0088	93201	93300	-	1.75315	0.431653	0.166886	0	1	0.246216	0.0951922	0
CC_0088	93251	93350	-	1.2272	0.647479	0.166886	0	1	0.527606	0.135989	0
CC_0088	93301	93400	-	0.701259	0.863306	0.333772	0	1	1.23108	0.475961	0
CC_0088	93351	93450	-	0.525944	0.431653	0.166886	0	1	0.82072	0.317307	0
CC_0088	93401	93500	-	1.05189	0.215826	0.166886	0	1	0.20518	0.158654	0
CC_0088	93451	93550	-	1.05189	0	0.333772	0	1	0	0.317307	0
CC_0088	93501	93600	-	0.701259	0	0.333772	0	1	0	0.475961	0
CC_0088	93551	93650	-	1.92846	0.431653	0.500658	0	1	0.223833	0.259615	0
CC_0088	93601	93700	-	2.10378	0.431653	0.166886	0	1	0.20518	0.0793268	0
CC_0088	93651	93750	-	2.45441	0.863306	0.166886	0	1	0.351737	0.0679944	0
CC_0088	93701	93800	-	0.701259	0.647479	0.333772	0	1	0.92331	0.475961	0
CC_0088	93751	93850	-	0.525944	0.647479	0.333772	0	1	1.23108	0.634615	0
CC_0088	93801	93900	-	0.350629	1.29496	0.333772	0.578954	1	3.69324	0.951922	1.65119
CC_0088	93851	93950	-	0.350629	1.29496	0.333772	1.15791	1	3.69324	0.951922	3.30237
CC_0088	93901	94000	-	1.2272	1.72661	0.500658	1.35089	1	1.40695	0.407967	1.10079
CC_0088	93951	94050	-	0.876573	1.51079	0.667544	0.771939	1	1.72351	0.761538	0.880633
CC_0088	94001	94100	-	0.876573	1.29496	0.333772	0.192985	1	1.4773	0.380769	0.220158
CC_0088	94051	94150	-	0	1.07913	0.166886	0	#DIV/0!	#DIV/0!	#DIV/0!	#DIV/0!
CC_0088	94101	94200	-	0.350629	1.51079	0.500658	0.578954	1	4.30878	1.42788	1.65119
CC_0088	94151	94250	-	0.350629	1.51079	0.500658	0.578954	1	4.30878	1.42788	1.65119
CC_0088	94201	94300	-	0.701259	1.29496	0.500658	0.578954	1	1.84662	0.713942	0.825593
CC_0088	94251	94350	-	0.350629	0.215826	0	0	1	0.61554	0	0
CC_0088	94301	94400	-	0.350629	0.215826	0	0.192985	1	0.61554	0	0.550395
CC_0088	94351	94450	-	0	0.215826	0	0.192985	#DIV/0!	#DIV/0!	#DIV/0!	#DIV/0!
CC_0088	94401	94500	-	0	0	0	0.192985	#DIV/0!	#DIV/0!	#DIV/0!	#DIV/0!
CC_0088	94451	94550	-	0	0	0	0	#DIV/0!	#DIV/0!	#DIV/0!	#DIV/0!
CC_0088	94501	94600	-	0.175315	1.29496	0	0.192985	1	7.38648	0	1.10079
CC_0088	94551	94650	-	0.350629	1.29496	0	0.192985	1	3.69324	0	0.550395
CC_0088	94601	94700	-	0.350629	1.29496	0.83443	0.192985	1	3.69324	2.3798	0.550395
CC_0088	94651	94750	-	0.701259	0	1.1682	0.38597	1	0	1.66586	0.550395
CC_0088	94701	94800	-	1.92846	0.215826	1.33509	0.964924	1	0.111916	0.692307	0.500359
CC_0088	94751	94850	-	1.92846	0.215826	0.500658	0.964924	1	0.111916	0.259615	0.500359
CC_0088	94801	94900	-	1.40252	0.215826	0.166886	0.578954	1	0.153885	0.11899	0.412797
CC_0088	94851	94950	-	0.350629	0.215826	0.500658	0	1	0.61554	1.42788	0
CC_0088	94901	95000	-	1.57783	0.431653	0.667544	0	1	0.273573	0.423076	0
CC_0088	94951	95050	-	1.57783	0.647479	1.00132	0	1	0.41036	0.634615	0
CC_0088	95001	95100	-	1.75315	0.647479	0.83443	0	1	0.369324	0.475961	0
CC_0088	95051	95150	-	2.10378	1.72661	1.00132	0	1	0.82072	0.475961	0
CC_0088	95101	95200	-	2.10378	1.51079	0.667544	0	1	0.71813	0.317307	0
CC_0088	95151	95250	-	1.57783	1.29496	0.333772	0	1	0.82072	0.211538	0
CC_0088	95201	95300	-	0	0	0	0.38597	#DIV/0!	#DIV/0!	#DIV/0!	#DIV/0!
CC_0088	95251	95350	-	0	0	0	0.38597	#DIV/0!	#DIV/0!	#DIV/0!	#DIV/0!
CC_0088	95301	95400	-	1.40252	0.215826	0	1.54388	1	0.153885	0	1.10079
CC_0088	95351	95450	-	1.40252	0.215826	0	1.35089	1	0.153885	0	0.963192
CC_0088	95401	95500	-	1.40252	0.215826	0.166886	1.35089	1	0.153885	0.11899	0.963192
CC_0088	95451	95550	-	0.175315	1.29496	0.500658	0.192985	1	7.38648	2.85577	1.10079
CC_0088	95501	95600	-	0.175315	1.29496	1.1682	0	1	7.38648	6.66345	0
CC_0088	95551	95650	-	1.05189	1.29496	1.33509	0	1	1.23108	1.26923	0
CC_0088	95601	95700	-	0.876573	0	1.00132	0	1	0	1.14231	0
CC_0088	95651	95750	-	0.876573	0.431653	0.333772	0	1	0.492432	0.380769	0
CC_0088	95701	95800	-	0	0.431653	0	0	#DIV/0!	#DIV/0!	#DIV/0!	#DIV/0!
CC_0088	95751	95850	-	0	0.431653	0	0	#DIV/0!	#DIV/0!	#DIV/0!	#DIV/0!
CC_0088	95801	95900	-	0	0.215826	0	0	#DIV/0!	#DIV/0!	#DIV/0!	#DIV/0!
CC_0088	95851	95950	-	0	0.647479	0	0	#DIV/0!	#DIV/0!	#DIV/0!	#DIV/0!
CC_0088	95901	96000	-	0	0.647479	0.166886	0	#DIV/0!	#DIV/0!	#DIV/0!	#DIV/0!
CC_0088	95951	96050	-	0.350629	0.431653	0.166886	0	1	1.23108	0.475961	0
CC_0088	96001	96100	-	0.350629	0	0.166886	0.192985	1	0	0.475961	0.550395
CC_0088	96051	96150	-	0.350629	0	0	0.192985	1	0	0	0.550395
CC_0088	96101	96200	-	0.350629	0	0	0.192985	1	0	0	0.550395
CC_0088	96151	96250	-	0.350629	0.431653	0	0.38597	1	1.23108	0	1.10079
CC_0088	96201	96300	-	10.3436	5.17983	6.17478	0.964924	1	0.500778	0.596968	0.0932873
CC_0088	96251	96350	-	26.4725	12.3021	13.3509	12.93	1	0.464712	0.50433	0.48843
	96301	96400		66.0936	42.302	17.8568	26.4389	1	0.640031	0.270174	0.400022
	96351	96450		68.1974	52.6616	14.0184	25.86	1	0.772194	0.205556	0.379193
	96401	96500		51.7178	45.971	6.84232	13.8949	1	0.888882	0.132301	0.268668
	96451	96550		15.603	19.2086	5.34035	0.192985	1	1.23108	0.342264	0.0123684
	96501	96600		10.1683	10.7913	7.67675	1.54388	1	1.06128	0.754973	0.151833
CC_0089	96551	96650	-	10.1683	12.3021	8.01052	1.54388	1	1.20985	0.787798	0.151833
CC_0089	96601	96700	-	7.36322	8.84888	5.00658	1.35089	1	1.20177	0.679944	0.183465
CC_0089	96651	96750	-	3.33098	2.15826	0.500658	0	1	0.647937	0.150303	0
CC_0089	96701	96800	-	3.33098	0.215826	0.500658	0	1	0.0647937	0.150303	0
CC_0089	96751	96850	-	2.62972	0	0.500658	0	1	0	0.190384	0
CC_0089	96801	96900	-	0	0	0.333772	0	#DIV/0!	#DIV/0!	#DIV/0!	#DIV/0!
CC_0089	96851	96950	-	0.350629	3.45322	0	3.28074	1	9.84864	0	9.35672
CC_0089	96901	97000	-	20.6871	15.7553	11.5151	25.474	1	0.7616	0.556632	1.23139
CC_0089	96951	97050	-	44.1793	19.856	20.8607	45.5444	1	0.449442	0.472184	1.0309
CC_0089	97001	97100	-	48.9128	25.6833	49.732	53.0708	1	0.525084	1.01675	1.08501
CC_0089	97051	97150	-	33.4851	22.4459	74.7649	42.0707	1	0.670326	2.23278	1.2564
CC_0089	97101	97200	-	9.99294	18.3452	66.2537	22.0003	1	1.83582	6.63005	2.20158
CC_0089	97151	97250	-	14.2005	11.0071	41.7215	27.0179	1	0.775125	2.93803	1.9026
CC_0089	97201	97300	-	23.3169	9.92802	9.67938	38.597	1	0.425787	0.415124	1.65532
CC_0089	97251	97350	-	38.2186	14.6762	9.17872	39.1759	1	0.384007	0.240164	1.02505
CC_0089	97301	97400	-	39.2705	31.2948	15.5204	23.3512	1	0.796904	0.395218	0.594624
CC_0089	97351	97450	-	35.9395	44.4602	20.527	5.40357	1	1.23709	0.571153	0.150352
CC_0089	97401	97500	-	21.0378	39.7121	20.1932	12.544	1	1.88766	0.959855	0.596262
CC_0089	97451	97550	-	11.3955	21.151	9.5125	12.544	1	1.85609	0.834762	1.10079
CC_0089	97501	97600	-	4.7335	0	0.83443	8.68431	1	0	0.176282	1.83465
CC_0089	97551	97650	-	7.01259	1.07913	1.83574	3.66671	1	0.153885	0.261779	0.522876
CC_0089	97601	97700	-	6.31133	1.07913	2.50329	3.66671	1	0.170983	0.396634	0.580973
CC_0089	97651	97750	-	5.08413	1.94244	4.50592	2.89477	1	0.382059	0.886272	0.569375
CC_0089	97701	97800	-	11.3955	11.223	14.3522	26.8249	1	0.984864	1.25947	2.354
CC_0090	97751	97850	+	21.2131	17.2661	19.6925	57.3165	1	0.813937	0.928321	2.70194
CC_0090	97801	97900	+	18.408	16.4028	17.0224	57.1235	1	0.891067	0.924724	3.10318
CC_0090	97851	97950	+	9.99294	6.04314	6.17478	37.0531	1	0.604741	0.617914	3.70793
CC_0090	97901	98000	+	0.175315	0	0.166886	6.75447	1	0	0.951922	38.5277
CC_0090	97951	98050	+	0.525944	0	0	6.75447	1	0	0	12.8426
CC_0090	98001	98100	+	0.350629	0	1.00132	0.192985	1	0	2.85577	0.550395
CC_0090	98051	98150	+	0.350629	0	1.00132	0.38597	1	0	2.85577	1.10079
CC_0090	98101	98200	+	0	0.215826	1.00132	0.38597	#DIV/0!	#DIV/0!	#DIV/0!	#DIV/0!
CC_0090	98151	98250	+	0	0.215826	0	0.38597	#DIV/0!	#DIV/0!	#DIV/0!	#DIV/0!
CC_0090	98201	98300	+	5.08413	9.71219	11.0145	0	1	1.9103	2.16644	0
CC_0090	98251	98350	+	14.0252	18.1294	24.0316	1.15791	1	1.29263	1.71346	0.0825593
CC_0090	98301	98400	+	20.6871	18.1294	25.7004	1.15791	1	0.876362	1.24234	0.0559724
CC_0090	98351	98450	+	15.603	8.63306	14.686	1.15791	1	0.553294	0.941226	0.0742106
CC_0090	98401	98500	+	8.41511	4.1007	6.34166	0.192985	1	0.487303	0.753605	0.0229331
CC_0090	98451	98550	+	14.2005	9.06471	13.5178	8.49133	1	0.638338	0.951922	0.59796
CC_0090	98501	98600	+	28.9269	10.5755	19.1919	19.8774	1	0.365594	0.663461	0.68716
CC_0090	98551	98650	+	28.5763	8.63306	15.1866	20.0704	1	0.302106	0.531441	0.702345
CC_0090	98601	98700	+	40.4977	8.63306	23.8647	11.7721	1	0.213174	0.589285	0.290685
CC_0090	98651	98750	+	45.5818	11.223	31.3745	39.7549	1	0.246216	0.688313	0.872165
CC_0090	98701	98800	+	51.8931	15.7553	52.7359	100.931	1	0.303611	1.01624	1.94498
CC_0090	98751	98850	+	29.8035	15.1078	52.4022	111.931	1	0.506915	1.75826	3.75564
CC_0090	98801	98900	+	9.99294	11.0071	39.2182	72.5623	1	1.10149	3.92459	7.26136
CC_0090	98851	98950	+	2.27909	4.31653	17.523	11.0001	1	1.89397	7.6886	4.82654
CC_0090	98901	99000	+	0	0	0.333772	0	#DIV/0!	#DIV/0!	#DIV/0!	#DIV/0!
CC_0090	98951	99050	+	0.525944	12.0863	5.84101	0.578954	1	22.9802	11.1058	1.10079
CC_0090	99001	99100	+	1.2272	26.9783	13.6846	0.771939	1	21.9836	11.1511	0.629023
CC_0090	99051	99150	+	1.2272	30.6474	16.5217	0.771939	1	24.9733	13.4629	0.629023
CC_0090	99101	99200	+	1.05189	15.9712	6.50855	0.192985	1	15.1833	6.18749	0.183465
CC_0090	99151	99250	+	0.701259	4.31653	4.83969	0	1	6.1554	6.90143	0
CC_0090	99201	99300	+	1.05189	3.02157	4.00526	0	1	2.87252	3.80769	0
CC_0090	99251	99350	+	0.701259	3.02157	4.00526	0	1	4.30878	5.71153	0
CC_0090	99301	99400	+	0.350629	2.37409	2.00263	0.192985	1	6.77094	5.71153	0.550395
CC_0090	99351	99450	+	0.175315	0	0	0.192985	1	0	0	1.10079
CC_0091	99401	99500	-	0.175315	0	0.166886	0.192985	1	0	0.951922	1.10079
CC_0091	99451	99550	-	2.45441	29.1366	1.83574	0	1	11.8711	0.747939	0
CC_0091	99501	99600	-	6.31133	65.6112	13.184	7.71939	1	10.3958	2.08894	1.2231
CC_0091	99551	99650	-	9.81762	78.7766	22.0289	14.2809	1	8.024	2.24382	1.45462
CC_0091	99601	99700	-	7.53853	50.0717	23.8647	14.4739	1	6.64211	3.16569	1.91998
CC_0091	99651	99750	-	4.03224	16.6186	13.8515	6.75447	1	4.12144	3.4352	1.67512
CC_0091	99701	99800	-	6.31133	5.39566	4.83969	0.192985	1	0.854917	0.766826	0.0305775
CC_0091	99751	99850	-	15.0771	41.4387	5.84101	5.0176	1	2.74846	0.38741	0.332797
CC_0091	99801	99900	-	21.9143	84.604	8.17741	11.3861	1	3.86067	0.373153	0.519573
CC_0091	99851	99950	-	27.6997	88.0572	13.184	30.8776	1	3.17899	0.475961	1.11472
[truncated: 78,861 more rows]

## Sheet: Feuil2
				Tn insertion				ratio to the WT
CDS	CDS start	CDS stop	orientation	WT	∆cpdR	∆tipN	∆tipN; ∆cpdR	WT	∆cpdR	∆tipN	∆tipN; ∆cpdR
popZ	1494862	1495295	+	35.7642	23.3093	6.50855	23.3512	1	0.651748	0.181985	0.65292
divJ	1220540	1222242	+	11.9214	18.3452	112.314	3.47373	1	1.53885	9.42123	0.291386
pleC	2716719	2719147	+	179.873	249.28	79.7715	468.181	1	1.38587	0.443488	2.60284
cpdR	841888	842144	+	7.71385	0	0	0	1	0	0	0
rcdA	3572720	3573129	+	110.273	163.812	38.8844	564.095	1	1.48552	0.35262	5.11544
popA	2061393	2062618	+	151.823	65.6112	16.5217	136.054	1	0.432157	0.108822	0.89614
tipN	1665921	1668469	+	141.83	56.1149	47.2287	53.2638	1	0.39565	0.332996	0.375548
