# Supplementary material for: Bacterial cell cycle control by citrate synthase independent of enzymatic activity
Source: eLife. 2020 Mar 9;9:e52272. doi: 10.7554/eLife.52272 (PMC7083601; doi:10.7554/eLife.52272)
Supplement: Figure 3—source data 1. [file elife-52272-fig3-data1.xlsx]

## Sheet: raw
Accepted Description	Max Fold Change	raw data									median			ratio compared to WT
		WT			citA::Tn			∆citA			WT	citA::Tn	∆citA	WT	citA::Tn	∆citA
CYTIDINE 2',3'-CYCLIC MONO-PHOSPHATE, 2',3' Cyclic CMP, cCMP	1.96124	1419.51	968.112	1316.59	1309.19	1419.15	815.554	1219.68	1011.9	1400.86	1316.59	1309.19	1219.68	1	1.00565	1.07945
PI 32:2 :: Glycerophospholipids :: Lipids :: [(2R)-1-[hydroxy-[(5R)-2,3,4,5,6-pentahydroxycyclohexyl]oxyphosphoryl]oxy-3-tetradecanoyloxypropan-2-yl] (9Z,12Z)-octadeca-9,12-dienoate	2.50181	100.948	131.995	133.725	34.0026	154.354	44.8437	104.597	113.417	53.3526	131.995	44.8437	104.597	1	2.94345	1.26195
PI 32:1 :: Glycerophospholipids :: Lipids :: [(2R)-2-[(Z)-hexadec-9-enoyl]oxy-3-[hydroxy-[(5R)-2,3,4,5,6-pentahydroxycyclohexyl]oxyphosphoryl]oxypropyl] hexadecanoate	2.27446	13950.8	12913.6	14245.4	8771.79	10471	7622.74	12264.9	9561.76	8771.2	13950.8	8771.79	9561.76	1	1.59041	1.45902
PG 36:2 :: Glycerophospholipids :: Lipids :: [(2R)-3-[[(2S)-2,3-dihydroxypropoxy]-hydroxyphosphoryl]oxy-2-[(Z)-octadec-9-enoyl]oxypropyl] (Z)-octadec-9-enoate	5.14708	415995	333359	488143	350430	297178	233339	317589	272769	399492	415995	297178	317589	1	1.39982	1.30985
PG 34:2 :: Glycerophospholipids :: Lipids :: [(2R)-1-[[(2S)-2,3-dihydroxypropoxy]-hydroxyphosphoryl]oxy-3-hexadecanoyloxypropan-2-yl] (9Z,12Z)-octadeca-9,12-dienoate	3.52292	1.61185e+06	1.23518e+06	1.6413e+06	710212	745478	485999	642648	460119	653315	1.61185e+06	710212	642648	1	2.26954	2.50814
Ophthalmic Acid :: Amino Acids :: Polar Metabolites :: (2S)-2-amino-5-[[(2S)-1-(carboxymethylamino)-1-oxobutan-2-yl]amino]-5-oxopentanoic acid	2.15081	1925.32	1809.47	1806.35	1450.56	1586.57	1528.17	1303.02	1376.59	1432.23	1809.47	1528.17	1376.59	1	1.18408	1.31446
URIDINE 5'-DIPHOSPHOGALACTOSE (UDP-D-Galactose)	4.6171	868.338	771.805	1266.93	910.667	716.137	553.232	933.955	701.793	740.225	868.338	716.137	740.225	1	1.21253	1.17307
PI 34:1 :: Glycerophospholipids :: Lipids :: [(2R)-1-hexadecanoyloxy-3-[hydroxy-[(3R)-2,3,4,5,6-pentahydroxycyclohexyl]oxyphosphoryl]oxypropan-2-yl] (Z)-octadec-9-enoate	27.1738	0	149.34	8.01368	6.47266	32.8517	19.0879	0	24.2232	30.2955	8.01368	19.0879	24.2232	1	0.41983	0.330827
ROSMARINIC ACID	1.73926	142.946	153.778	144.616	190.221	180.386	143.449	166.835	166.218	189.928	144.616	180.386	166.835	1	0.801701	0.866819
D-GALACTARIC ACID	2.04893	53.8814	67.0371	59.4886	93.0792	73.3287	87.9881	96.0091	96.1622	159.556	59.4886	87.9881	96.1622	1	0.676098	0.618627
FAD :: Flavin Nucleotides :: Polar Metabolites :: [[(2R,3S,4R,5R)-5-(6-aminopurin-9-yl)-3,4-dihydroxyoxolan-2-yl]methoxy-hydroxyphosphoryl] [(2R,3S,4S)-5-(7,8-dimethyl-2,4-dioxobenzo[g]pteridin-10-yl)-2,3,4-trihydroxypentyl] hydrogen phosphate	1.93759	1718.34	1645.47	1597.7	1156.41	1047.41	738.485	1212.58	974.773	1245.93	1645.47	1047.41	1212.58	1	1.57099	1.357
PG 32:0 :: Glycerophospholipids :: Lipids :: [(2R)-3-[[(2S)-2,3-dihydroxypropoxy]-hydroxyphosphoryl]oxy-2-hexadecanoyloxypropyl] hexadecanoate	10.0487	135500	84325.7	102842	49154.4	57034.9	36917.6	61552.4	39972	56672.2	102842	49154.4	56672.2	1	2.09223	1.81469
9Z-Octadecenoic Acid :: Fatty Acyls :: Lipids :: (Z)-octadec-9-enoic acid	9.08662	66157.5	42774.8	63500.6	44477.1	39752.8	24376.8	29755.2	13189.8	30554.1	63500.6	39752.8	29755.2	1	1.59739	2.1341
9Z-Octadecenoic Acid :: Fatty Acyls :: Lipids :: (Z)-octadec-9-enoic acid	2.00715	14510.1	13551.1	17526.4	14328.5	14752	9256.88	13233.1	11391.4	8196.29	14510.1	14328.5	11391.4	1	1.01268	1.27379
PALMITOLEIC ACID	2.69902	7625.34	5840.5	7433.36	3434.95	3201.05	2128.41	2929.16	2558.47	1920.67	7433.36	3201.05	2558.47	1	2.32217	2.90539
Dethiobiotin :: Azoles :: Polar Metabolites :: 6-[(4R,5S)-5-methyl-2-oxoimidazolidin-4-yl]hexanoic acid	2.20709	210.936	212.17	188.149	342.424	277.194	369.116	300.531	369.692	312.932	210.936	342.424	312.932	1	0.616007	0.674063
Trans-Cinnamate :: Carboxylic Acids :: Polar Metabolites :: (E)-3-phenylprop-2-enoic acid	1.46077	286.742	279.637	276.669	328.716	335.013	333.521	297.83	293.503	318.628	279.637	333.521	297.83	1	0.838439	0.938915
ACETYL-COA	4.97607	1924.22	1610.65	1965.48	4861.49	4829.66	2978.79	3750.55	3246.02	3686.95	1924.22	4829.66	3686.95	1	0.398417	0.5219
(R,R)-Tartaric Acid :: Sugar Acids :: Polar Metabolites :: (2R,3R)-2,3-dihydroxybutanedioic acid	2.15932	118.024	136.038	140.326	139.49	120.567	153.189	163.836	149.426	106.49	136.038	139.49	149.426	1	0.975254	0.910405
5-Oxo-D-Proline :: Carboxylic Acids :: Polar Metabolites :: (2R)-5-oxopyrrolidine-2-carboxylic acid	1.22507	494.45	354.236	401.544	325.576	484.282	292.899	350.963	288.455	340.878	401.544	325.576	340.878	1	1.23333	1.17797
Palatinose :: Mono- and Disaccharides :: Polar Metabolites :: (2R,3S,4S,5R,6S)-2-(hydroxymethyl)-6-[[(2R,3S,4S)-3,4,5-trihydroxy-5-(hydroxymethyl)oxolan-2-yl]methoxy]oxane-3,4,5-triol	8.2172	7.83898	2.06746	4.89279	9.1036	18.1662	7.66754	4.58877	4.48353	11.6632	4.89279	9.1036	4.58877	1	0.537456	1.06625
Allose :: Mono- and Disaccharides :: Polar Metabolites :: (3R,4R,5S,6R)-6-(hydroxymethyl)oxane-2,3,4,5-tetrol	2.39927	15.1188	14.5898	10.9874	27.4012	20.3525	22.9775	33.2055	28.4518	27.0339	14.5898	22.9775	28.4518	1	0.63496	0.51279
LL-2,6-Diaminoheptanedioate :: Carboxylic Acids :: Polar Metabolites :: (2S,6S)-2,6-diaminoheptanedioic acid	6.64291	237.265	398.523	374.828	158.202	171.778	207.053	110.02	57.0208	28.2708	374.828	171.778	57.0208	1	2.18205	6.57353
2-DEOXY-D-GLUCOSE	1.61686	318.618	115.321	87.7973	275.272	79.5333	21.9391	370.887	24.002	51.9949	115.321	79.5333	51.9949	1	1.44996	2.21792
2'-DEOXYGUANOSINE 5'-DIPHOSPHATE (dGDP)	4.29398	754.619	681.472	777.492	378.854	364.171	276.631	350.053	207.617	93.9916	754.619	364.171	207.617	1	2.07216	3.63466
D-GLUCOSAMINE 6-PHOSPHATE	4.28571	358.459	306.369	346.172	162.824	205.111	208.247	114.242	117.858	112.56	346.172	205.111	114.242	1	1.68773	3.03015
N-ACETYLNEURAMINIC ACID	1.43647	424.899	418.074	409.11	527.026	504.97	517.398	513.257	558.597	552.16	418.074	517.398	552.16	1	0.808032	0.75716
MALTOSE	1.35199	37877.6	32584.6	34251.8	39445	38498.8	36077.9	38928	38884.8	42095.2	34251.8	38498.8	38928	1	0.889685	0.879876
Glycerol Monophosphate :: Sugar Phosphates :: Polar Metabolites :: [(2R)-2,3-dihydroxypropyl] dihydrogen phosphate	2.8827	319.134	268.501	290.459	193.069	175.682	139.48	231.279	153.497	178.765	290.459	175.682	178.765	1	1.65332	1.62481
URIDINE 5'-DIPHOSPHOGLUCOSE, UDP-glucose	50.2688	229.786	114.164	219.139	61.1212	49.5783	17.2326	85.6458	63.3674	0.749725	219.139	49.5783	63.3674	1	4.42007	3.45823
S-(5'-ADENOSYL)-L-HOMOCYSTEINE	5.16331	383.411	337.422	317.596	329.752	282.412	200.45	405.649	326.91	354.522	337.422	282.412	354.522	1	1.19479	0.951767
Taurochenodeoxycholic Acid :: Steroids :: Lipids :: 2-[[(4R)-4-[(3R,5S,7R,8R,9S,10S,13R,14S,17R)-3,7-dihydroxy-10,13-dimethyl-2,3,4,5,6,7,8,9,11,12,14,15,16,17-tetradecahydro-1H-cyclopenta[a]phenanthren-17-yl]pentanoyl]amino]ethanesulfonic acid	1.36353	707894	555003	570823	580616	600570	796842	653097	743274	508273	570823	600570	653097	1	0.950469	0.874025
CHOLIC ACID	2.71891	5190.85	2832.42	3937.1	3766.29	4325.44	3010.55	4785.15	4954.85	2930.75	3937.1	3766.29	4785.15	1	1.04535	0.822774
2'-DEOXYCYTIDINE 5'-DIPHOSPHATE (dCDP)	13.3834	232.888	320.422	434.631	147.954	129.092	82.7767	129.342	62.2082	96.2237	320.422	129.092	96.2237	1	2.48212	3.32997
Glutathione Reduced :: Carboxylic Acids :: Polar Metabolites :: (2S)-2-amino-5-[[(2R)-1-(carboxymethylamino)-1-oxo-3-sulfanylpropan-2-yl]amino]-5-oxopentanoic acid	29.4399	14087.9	10551.5	10684.5	12608.9	12274.3	9354.13	10364.2	7719.3	15188	10684.5	12274.3	10364.2	1	0.870476	1.0309
Methyl Beta-D-Galactoside :: Mono- and Disaccharides :: Polar Metabolites :: (2R,3R,4S,5R,6R)-2-(hydroxymethyl)-6-methoxyoxane-3,4,5-triol	1.69532	360.109	428.148	379.999	586.558	564.623	623.564	589.292	653.169	596.861	379.999	586.558	596.861	1	0.647845	0.636663
Nalpha-Acetyl-L-Lysine :: Amino Acids :: Polar Metabolites :: (2S)-2-acetamido-6-aminohexanoic acid	2.01299	1002.79	825.486	861.168	947.148	1001.67	948.475	871.091	810.703	893.268	861.168	948.475	871.091	1	0.90795	0.988609
Alpha-Aminoadipate :: Carboxylic Acids :: Polar Metabolites :: (2S)-2-aminohexanedioic acid	25.2916	31.0123	12.145	5.24096	329.613	349.809	249.81	339.156	317.741	432.547	12.145	329.613	339.156	1	0.0368463	0.0358096
D-RIBOSE 5-PHOSPHATE	Infinity	231.187	88.616	99.7974	71.1081	67.7247	12.5697	60.4203	12.2275	22.4373	99.7974	67.7247	22.4373	1	1.47358	4.44783
Pterin :: Pteridines :: Polar Metabolites :: 2-amino-1H-pteridin-4-one	7.1291	430.747	322.314	310.299	239.001	273.707	163.81	218.158	149.794	229.906	322.314	239.001	218.158	1	1.34859	1.47744
N-ACETYL-DL-GLUTAMIC ACID	3.29058	3489.8	2385.22	2913.1	1197.2	1563.09	1035.19	1214.27	986.957	1190.73	2913.1	1197.2	1190.73	1	2.43327	2.44648
Cystine :: Carboxylic Acids :: Polar Metabolites :: (2R)-2-amino-3-[[(2R)-2-amino-2-carboxyethyl]disulfanyl]propanoic acid	1.7403	28.9093	32.0342	28.473	38.168	22.3006	26.69	41.8375	29.1248	38.8038	28.9093	26.69	38.8038	1	1.08315	0.745011
3'-CMP **** PEUT ETRE LE PRODUIT SIGMA EST LE 5'	3.2185	2010.77	2358.69	3480	1861.85	1650.52	1465.31	1649.78	1442.18	1668.43	2358.69	1650.52	1649.78	1	1.42906	1.4297
D-MANNOSE 6-PHOSPHATE	8.30087	267.237	188.952	172.71	169.414	172.966	132.683	166.348	164.05	191.454	188.952	169.414	166.348	1	1.11532	1.13588
3-Nitro-L-Tyrosine :: Amino Acids :: Polar Metabolites :: (2S)-2-amino-3-(4-hydroxy-3-nitrophenyl)propanoic acid	2.16296	144.009	150.515	161.768	193.076	210.962	250.341	178.634	200.915	177.435	150.515	210.962	178.634	1	0.713469	0.842587
5-AMINOIMIDAZOLE-4-CARBOXAMIDE-1-BETA-D-RIBOFURANOSYL 5'-MONOPHOSPHATE	2.1846	506.202	331.03	481.036	375.478	464.219	248.479	342.486	217.298	368.841	481.036	375.478	342.486	1	1.28113	1.40454
N-Acetyl-L-Aspartic Acid :: Amino Acids :: Polar Metabolites :: (2S)-2-acetamidobutanedioic acid	2.09437	311.884	279.862	303.502	276.193	210.752	173.253	305.011	244.379	273.586	303.502	210.752	273.586	1	1.4401	1.10935
ADENOSINE	5.64041	7834.36	5253.02	6655.83	2497.14	3292.57	2300.45	2155.21	1572.9	1715.69	6655.83	2497.14	1715.69	1	2.66538	3.87939
N-ACETYL-D-GALACTOSAMINE	20.6331	25.4081	15.172	23.9299	159.595	84.0618	84.79	227.69	193.273	206.95	23.9299	84.79	206.95	1	0.282225	0.115631
ADENOSINE 5'-DIPHOSPHORIBOSE (ADP-ribose)	3.86677	9807.04	8501.08	9641.94	9805.84	9832.17	6866.61	9645.96	8327.3	9623.14	9641.94	9805.84	9623.14	1	0.983286	1.00195
D-SACCHARIC ACID, D-glucaric acid	1.95545	1024.49	396.419	382.769	422.455	396.133	512.075	389.7	322.536	104.993	396.419	422.455	322.536	1	0.938372	1.22907
L-GLUTAMIC ACID	1.17781	1030.91	747.359	839.84	729.818	1075.97	652.043	881.011	625.022	783.239	839.84	729.818	783.239	1	1.15075	1.07226
Ursodeoxycholic Acid :: Steroids :: Lipids :: (4R)-4-[(3R,5S,7S,8R,9S,10S,13R,14S,17R)-3,7-dihydroxy-10,13-dimethyl-2,3,4,5,6,7,8,9,11,12,14,15,16,17-tetradecahydro-1H-cyclopenta[a]phenanthren-17-yl]pentanoic acid	2.53917	1569.87	980.945	967.911	1011.7	1199.76	1514.62	1666.27	2575.08	1224.83	980.945	1199.76	1666.27	1	0.817619	0.588708
GUANOSINE 3',5'-CYCLIC MONOPHOSPHATE (3',5'-cyclic GMP) cGMP	6.02882	1597.89	1133	1385.48	748.127	988.215	749.895	788.8	891.461	955.362	1385.48	749.895	891.461	1	1.84756	1.55417
L-NORLEUCINE	1.54094	651.945	358.832	574.463	764.542	746.995	595.39	991.045	713.97	708.722	574.463	746.995	713.97	1	0.769033	0.804604
4-Acetamidobutanoate :: Carboxylic Acids :: Polar Metabolites :: 4-acetamidobutanoic acid	3.95621	16.8088	13.2077	19.1415	4.56535	7.1396	2.51683	3.43592	5.19027	8.56361	16.8088	4.56535	5.19027	1	3.68183	3.23852
Uridine 5'-Diphosphoglucuronic Acid :: Nucleotides :: Polar Metabolites :: (2S,3S,4S,5R,6R)-6-[[[(2R,3S,4R,5R)-5-(2,4-dioxopyrimidin-1-yl)-3,4-dihydroxyoxolan-2-yl]methoxy-hydroxyphosphoryl]oxy-hydroxyphosphoryl]oxy-3,4,5-trihydroxyoxane-2-carboxylic acid	20.4476	586.654	1162.36	1661.3	480.018	274.007	725.759	451.08	223.43	254.242	1162.36	480.018	254.242	1	2.4215	4.57188
ADENOSINE-5'-DIPHOSPHOGLUCOSE (ADP alpha-D-glucoside)	6.08074	80.0665	63.744	62.6939	75.0872	110.451	61.1249	47.1215	21.2449	18.1628	63.744	75.0872	21.2449	1	0.848933	3.00044
Deoxyuridine :: Nucleotides :: Polar Metabolites :: 1-[(2R,4S,5R)-4-hydroxy-5-(hydroxymethyl)oxolan-2-yl]pyrimidine-2,4-dione	2.7966	23.2897	20.6791	24.3778	23.3909	23.4608	10.3681	26.025	27.6132	26.3033	23.2897	23.3909	26.3033	1	0.995671	0.885429
DAMP	34.2671	111.335	180.05	159.966	70.2326	49.1958	43.6776	65.9489	43.7359	48.6058	159.966	49.1958	48.6058	1	3.25162	3.29109
Glycochenodeoxycholic Acid :: Steroids :: Lipids :: 2-[[(4R)-4-[(3R,5S,7R,8R,9S,10S,13R,14S,17R)-3,7-dihydroxy-10,13-dimethyl-2,3,4,5,6,7,8,9,11,12,14,15,16,17-tetradecahydro-1H-cyclopenta[a]phenanthren-17-yl]pentanoyl]amino]acetic acid	6.76842	734.845	499.922	396.014	613.973	553.952	1464.52	677.628	1050.39	320.015	499.922	613.973	677.628	1	0.814242	0.737753
Gluconic Acid :: Carbohydrates :: Polar Metabolites :: (2R,3S,4R,5R)-2,3,4,5,6-pentahydroxyhexanoic acid	1.28862	312.244	286.406	299.984	287.559	288.043	269.808	287.157	269.871	279.425	299.984	287.559	279.425	1	1.04321	1.07358
Glycocholic Acid :: Steroids :: Lipids :: 2-[[(4R)-4-[(3R,5S,7R,8R,9S,10S,12S,13R,14S,17R)-3,7,12-trihydroxy-10,13-dimethyl-2,3,4,5,6,7,8,9,11,12,14,15,16,17-tetradecahydro-1H-cyclopenta[a]phenanthren-17-yl]pentanoyl]amino]acetic acid	2.04222	59244.4	39487.2	41180.3	67329.9	53478	66453.1	61179.7	84027.3	61366	41180.3	66453.1	61366	1	0.61969	0.671062
THYMIDINE 5'-MONOPHOSPHATE (dTMP)	18.394	745.769	972.023	1106.2	537.867	583.21	553.628	630.467	624.938	750.051	972.023	553.628	630.467	1	1.75573	1.54175
GUANOSINE 5'-DIPHOSPHATE (GDP)	6.89923	606.232	710.107	679.023	247.764	217.03	284.096	162.734	57.3696	21.2651	679.023	247.764	57.3696	1	2.74061	11.8359
INOSINE 5'-MONOPHOSPHATE (IMP)	128.598	1165.62	1187.26	878.536	286.102	298.421	230.358	291.664	258.005	292.223	1165.62	286.102	291.664	1	4.07415	3.99647
Trehalose :: Carbohydrates :: Polar Metabolites :: (2R,3S,4S,5R,6R)-2-(hydroxymethyl)-6-[(2R,3R,4S,5S,6R)-3,4,5-trihydroxy-6-(hydroxymethyl)oxan-2-yl]oxyoxane-3,4,5-triol	1.66066	4799.37	3388.55	3846.11	4180.27	4924.91	3277.55	3983.58	3326.17	4355.38	3846.11	4180.27	3983.58	1	0.920062	0.96549
5-Oxoproline :: Carboxylic Acids :: Polar Metabolites :: (2S)-5-oxopyrrolidine-2-carboxylic acid	1.47162	516.417	487.569	675.402	573.664	552.875	429.1	603.016	467.665	555.648	516.417	552.875	555.648	1	0.934057	0.929396
D-GLUCONO-1,5-LACTONE	15.4831	1.3755	4.4195	5.07698	3.7646	29.5691	8.88536	4.59933	1.20532	0.361385	4.4195	8.88536	1.20532	1	0.497391	3.66665
GUANOSINE 5'-MONOPHOSPHATE (GMP)	5.23347	2758.21	2718.19	3452.24	1533.87	1522.83	1447.41	1524.19	1405.25	1562.13	2758.21	1522.83	1524.19	1	1.81123	1.80962
Guanosine :: Purine Nucleosides :: Polar Metabolites :: 2-amino-9-[(2R,3R,4S,5R)-3,4-dihydroxy-5-(hydroxymethyl)oxolan-2-yl]-3H-purin-6-one	11.2262	2880.41	2124.16	2799.22	632.745	804.727	713.515	471.033	297.856	347.584	2799.22	713.515	347.584	1	3.92314	8.05336
Taurocholic Acid :: Steroids :: Lipids :: 2-[[(4R)-4-[(3R,5S,7R,8R,9S,10S,12S,13R,14S,17R)-3,7,12-trihydroxy-10,13-dimethyl-2,3,4,5,6,7,8,9,11,12,14,15,16,17-tetradecahydro-1H-cyclopenta[a]phenanthren-17-yl]pentanoyl]amino]ethanesulfonic acid	1.16269	982511	737205	818381	870490	848220	799673	902707	894049	653333	818381	848220	894049	1	0.964821	0.915365
L-Arginine :: Amino Acids :: Polar Metabolites :: (2S)-2-amino-5-(diaminomethylideneamino)pentanoic acid	2.82443	6263.72	5375.79	3581.24	5140.09	3653.27	2102.7	6132.49	4049.71	4257.2	5375.79	3653.27	4257.2	1	1.4715	1.26275
L-TRYPTOPHAN	1.23587	3395.5	2780.17	3043.03	2957.95	3075.27	2652.98	2870.57	2598.11	2969.99	3043.03	2957.95	2870.57	1	1.02876	1.06008
L-HISTIDINE	1.49536	1191.15	1073.5	1150.27	1007.87	1081.82	905.469	925.208	867.878	959.978	1150.27	1007.87	925.208	1	1.14128	1.24325
CYTIDINE	2.85997	161.46	180.739	136.942	350.488	302.028	345.385	355.335	408.721	385.337	161.46	345.385	385.337	1	0.467479	0.419011
Phenylalanine :: Phenylpropanoic Acids :: Polar Metabolites :: (2S)-2-amino-3-phenylpropanoic acid	1.32006	6508.18	5874.22	6337.93	7125.6	7409.62	6606.98	6916.42	6419.38	6724.41	6337.93	7125.6	6724.41	1	0.889459	0.942525
Uridine 5'-Triphosphate :: Nucleotides :: Polar Metabolites :: [[(2R,3S,4R,5R)-5-(2,4-dioxopyrimidin-1-yl)-3,4-dihydroxyoxolan-2-yl]methoxy-hydroxyphosphoryl] phosphono hydrogen phosphate	15.6292	124.875	337.129	312.625	165.074	95.6898	156.358	92.0367	9.00186	5.97744	312.625	156.358	9.00186	1	1.99941	34.729
Leucine :: Carboxylic Acids :: Polar Metabolites :: (2S)-2-amino-4-methylpentanoic acid	1.26586	1219.66	1034.33	1041.57	1266.85	1395.82	1134.3	1070.3	1107.07	1326.61	1041.57	1266.85	1107.07	1	0.82217	0.940832
AMP :: Purine Nucleotides :: Polar Metabolites :: [(2R,3S,4R,5R)-5-(6-aminopurin-9-yl)-3,4-dihydroxyoxolan-2-yl]methyl dihydrogen phosphate	7.27383	17662.7	17850.8	19582.6	9670.04	8386.52	7652.03	9707.23	8782.87	9841.98	17850.8	8386.52	9707.23	1	2.12851	1.83892
ADENOSINE 3',5'-CYCLIC MONOPHOSPHATE (3',5'-cyclic AMP), cAMP	2.2413	67.726	63.395	130.42	65.614	42.2087	84.5201	64.844	74.6848	45.2519	67.726	65.614	64.844	1	1.03219	1.04445
Tyrosine :: Phenylpropanoic Acids :: Polar Metabolites :: (2S)-2-amino-3-(4-hydroxyphenyl)propanoic acid	1.36841	5173.34	4425.73	4580.74	5734.63	6335.85	5584.17	5813.46	5667.98	6369.74	4580.74	5734.63	5813.46	1	0.798786	0.787954
URIDINE 5'-DIPHOSPHATE (UDP)	9.32815	6272.71	7057.56	10855.9	5801.43	4604.62	4014.12	5564.99	3472.31	3386.7	7057.56	4604.62	3472.31	1	1.53271	2.03252
URIDINE-5-MONOPHOSPHATE	3.32664	5219.94	6220.09	5937.31	3798.97	3687.11	3283.05	3672.51	3403.64	3669.03	5937.31	3687.11	3669.03	1	1.61029	1.61822
Uridine :: Pyrimidine Nucleosides :: Polar Metabolites :: 1-[(2R,3R,4S,5R)-3,4-dihydroxy-5-(hydroxymethyl)oxolan-2-yl]pyrimidine-2,4-dione	4.12913	9808.88	8288.12	9867.14	4236.25	5793.77	4484.23	3840.15	2213.12	2301.69	9808.88	4484.23	2301.69	1	2.18742	4.2616
ADP :: Purine Nucleotides :: Polar Metabolites :: [(2R,3S,4R,5R)-5-(6-aminopurin-9-yl)-3,4-dihydroxyoxolan-2-yl]methyl phosphono hydrogen phosphate	2.5645	6788.92	5555.95	5837.35	3363.05	2952.56	2212.37	3127.69	2330.76	2571.71	5837.35	2952.56	2571.71	1	1.97705	2.26983
Inosine :: Purine Nucleosides :: Polar Metabolites :: 9-[(2R,3R,4S,5R)-3,4-dihydroxy-5-(hydroxymethyl)oxolan-2-yl]-3H-purin-6-one	11.2667	1434.65	1306.55	1338.23	369.619	493.8	469.299	287.531	176.287	154.968	1338.23	469.299	176.287	1	2.85155	7.5912
Lysine :: Carboxylic Acids :: Polar Metabolites :: (2S)-2,6-diaminohexanoic acid	5.19782	215.756	127.84	78.9516	312.68	346.798	176.575	299.766	210.689	300.715	127.84	312.68	299.766	1	0.408853	0.426467
Glutamine :: Carboxylic Acids :: Polar Metabolites :: (2S)-2,5-diamino-5-oxopentanoic acid	2.15831	106.032	77.4203	92.1814	97.9878	109.38	71.0911	87.6397	70.7288	88.6995	92.1814	97.9878	87.6397	1	0.940744	1.05182
L-ASPARTIC ACID	2.25817	23.725	28.1932	39.5701	55.0685	80.7503	54.8271	44.5888	51.1189	59.1002	28.1932	55.0685	51.1189	1	0.511965	0.551521
D-GLUCOSE 6-PHOSPHATE	8.84756	822.397	336.388	460.435	464.827	376.968	287.538	576.339	502.231	584.705	460.435	376.968	576.339	1	1.22141	0.798896
ADENOSINE 5'-TRIPHOSPHATE (ATP)	4.72852	2038.3	1562.59	1485.03	958.37	1049.36	549.529	629.659	294.193	35.2496	1562.59	958.37	294.193	1	1.63047	5.31145
4-HYDROXY-L-PROLINE	3.95834	412.336	429.841	366.14	889.456	624.942	545.658	875.178	686.85	835.299	412.336	624.942	835.299	1	0.659798	0.493638
4-HYDROXY-2-QUINOLINECARBOXYLIC ACID	65.3104	3.00788	5.57901	1.00527	24.7179	13.5379	9.84659	12.3398	55.7351	27.0554	3.00788	13.5379	27.0554	1	0.222182	0.111175
ISOCITRIC ACID	10.4376	47.4252	17.8642	11.0019	8.15661	5.54143	16.4913	2.67663	2.88119	0	17.8642	8.15661	2.67663	1	2.19015	6.67412
Xanthine :: Alkaloids and Derivatives :: Polar Metabolites :: 3,7-dihydropurine-2,6-dione	2.02294	5465.16	5840.06	5201.43	9731.83	8939.38	9581.72	9980.43	10720.7	10628.8	5465.16	9581.72	10628.8	1	0.570374	0.514185
URIC ACID	2.058	1616.95	1780.51	1390.12	2025.37	1943.93	1861	1923.14	1871.61	2020.14	1616.95	1943.93	1923.14	1	0.831793	0.840788
D-PANTOTHENIC ACID	2.8019	1218.67	976.806	913.774	1778.98	1540.58	1624.66	1782.82	2077.45	1886.02	976.806	1624.66	1886.02	1	0.601236	0.51792
PALMITIC ACID	1.83843	13079.8	9455.12	11880.3	15026.1	15559.1	11646.6	12410.7	9744.99	9886.35	11880.3	15026.1	9886.35	1	0.790643	1.20168
Indole :: Indoles :: Polar Metabolites :: 1H-indole	1.57545	18.1068	17.8963	25.045	14.3909	21.8269	11.0358	21.4022	16.4125	17.2409	18.1068	14.3909	17.2409	1	1.25821	1.05023
Hypoxanthine :: Imidazopyrimidines :: Polar Metabolites :: 3,7-dihydropurin-6-one	1.46286	2279.93	2425.82	2607.8	3078.8	2950.64	2804.5	3490.83	3342.52	3111.52	2425.82	2950.64	3342.52	1	0.822136	0.725746
Citrate :: Carboxylic Acids :: Polar Metabolites :: 2-hydroxypropane-1,2,3-tricarboxylic acid	4.81639	1492.71	357.912	217.706	220.694	217.288	232.551	253.819	314.338	130.319	357.912	220.694	253.819	1	1.62176	1.41011
ADENINE	2.1838	4727.06	3921.66	4604.99	2434.94	2617.45	2232.59	6048.73	5238.48	4990.53	4604.99	2434.94	5238.48	1	1.89121	0.87907

## Sheet: volcano citATn
Accepted Description	ratio citA::Tn/WT
	Score	p-Value	Fold	Log fold
URIDINE 5'-DIPHOSPHOGLUCOSE, UDP-glucose	0.768548	0.046295	0.227197	-2.13799
INOSINE 5'-MONOPHOSPHATE (IMP)	0.0974265	0.0121174	0.252175	-1.98751
Guanosine :: Purine Nucleosides :: Polar Metabolites :: 2-amino-9-[(2R,3R,4S,5R)-3,4-dihydroxy-5-(hydroxymethyl)oxolan-2-yl]-3H-purin-6-one	0.607368	0.0129735	0.275634	-1.85918
4-Acetamidobutanoate :: Carboxylic Acids :: Polar Metabolites :: 4-acetamidobutanoic acid	0.243559	0.00704525	0.289308	-1.78932
Inosine :: Purine Nucleosides :: Polar Metabolites :: 9-[(2R,3R,4S,5R)-3,4-dihydroxy-5-(hydroxymethyl)oxolan-2-yl]-3H-purin-6-one	0.302808	7.15364e-05	0.326692	-1.614
DAMP	0.284247	0.0291476	0.361373	-1.46844
GUANOSINE 5'-DIPHOSPHATE (GDP)	1.32315	0.000822635	0.375315	-1.41382
ADENOSINE	0.238502	0.022579	0.409769	-1.28712
PALMITOLEIC ACID	0.080184	0.00590018	0.419366	-1.25372
N-ACETYL-DL-GLUTAMIC ACID	0.23268	0.019704	0.431886	-1.21128
PG 34:2 :: Glycerophospholipids :: Lipids :: [(2R)-1-[[(2S)-2,3-dihydroxypropoxy]-hydroxyphosphoryl]oxy-3-hexadecanoyloxypropan-2-yl] (9Z,12Z)-octadeca-9,12-dienoate	0.0950826	0.00876731	0.432608	-1.20887
PG 32:0 :: Glycerophospholipids :: Lipids :: [(2R)-3-[[(2S)-2,3-dihydroxypropoxy]-hydroxyphosphoryl]oxy-2-hexadecanoyloxypropyl] hexadecanoate	0.365335	0.0428578	0.443512	-1.17296
2'-DEOXYGUANOSINE 5'-DIPHOSPHATE (dGDP)	1.30449	0.000798199	0.460636	-1.1183
AMP :: Purine Nucleotides :: Polar Metabolites :: [(2R,3S,4R,5R)-5-(6-aminopurin-9-yl)-3,4-dihydroxyoxolan-2-yl]methyl dihydrogen phosphate	0.283439	0.000324794	0.466614	-1.0997
ADP :: Purine Nucleotides :: Polar Metabolites :: [(2R,3S,4R,5R)-5-(6-aminopurin-9-yl)-3,4-dihydroxyoxolan-2-yl]methyl phosphono hydrogen phosphate	0.149798	0.00316408	0.469029	-1.09225
CYTIDINE	0.319795	0.00113734	2.08269	1.05845
L-ASPARTIC ACID	0.836675	0.041284	2.08383	1.05924
Alpha-Aminoadipate :: Carboxylic Acids :: Polar Metabolites :: (2S)-2-aminohexanedioic acid	1.83972	0.00761169	19.1997	4.26301

## Sheet: volcano ∆citA
Accepted Description	ratio ∆citA/WT
	Score	p-Value	Fold	Log fold
GUANOSINE 5'-DIPHOSPHATE (GDP)	2.76057	0.000598357	0.120965	-3.04734
Guanosine :: Purine Nucleosides :: Polar Metabolites :: 2-amino-9-[(2R,3R,4S,5R)-3,4-dihydroxy-5-(hydroxymethyl)oxolan-2-yl]-3H-purin-6-one	2.35797	0.00893885	0.143068	-2.80523
Inosine :: Purine Nucleosides :: Polar Metabolites :: 9-[(2R,3R,4S,5R)-3,4-dihydroxy-5-(hydroxymethyl)oxolan-2-yl]-3H-purin-6-one	3.57176	3.46849e-05	0.151685	-2.72085
ADENOSINE 5'-TRIPHOSPHATE (ATP)	1.60952	0.00486991	0.18858	-2.40675
LL-2,6-Diaminoheptanedioate :: Carboxylic Acids :: Polar Metabolites :: (2S,6S)-2,6-diaminoheptanedioic acid	1.24713	0.0183179	0.19326	-2.37139
INOSINE 5'-MONOPHOSPHATE (IMP)	2.47392	0.0143349	0.260533	-1.94046
URIDINE 5'-DIPHOSPHOGLUCOSE, UDP-glucose	2.3713	0.0434936	0.265967	-1.91068
ADENOSINE	1.80495	0.0191887	0.27573	-1.85867
2'-DEOXYCYTIDINE 5'-DIPHOSPHATE (dCDP)	1.74022	0.045878	0.291286	-1.77949
2'-DEOXYGUANOSINE 5'-DIPHOSPHATE (dGDP)	2.63064	0.011135	0.294393	-1.76419
Uridine :: Pyrimidine Nucleosides :: Polar Metabolites :: 1-[(2R,3R,4S,5R)-3,4-dihydroxy-5-(hydroxymethyl)oxolan-2-yl]pyrimidine-2,4-dione	2.13592	0.000904211	0.298774	-1.74287
D-GLUCOSAMINE 6-PHOSPHATE	2.15055	0.00464088	0.340911	-1.55253
4-Acetamidobutanoate :: Carboxylic Acids :: Polar Metabolites :: 4-acetamidobutanoic acid	2.43678	0.0100679	0.349685	-1.51587
DAMP	1.88389	0.0308756	0.350704	-1.51167
PALMITOLEIC ACID	2.12307	0.0057983	0.354478	-1.49623
N-ACETYL-DL-GLUTAMIC ACID	1.7848	0.0252981	0.38597	-1.37344
PG 34:2 :: Glycerophospholipids :: Lipids :: [(2R)-1-[[(2S)-2,3-dihydroxypropoxy]-hydroxyphosphoryl]oxy-3-hexadecanoyloxypropan-2-yl] (9Z,12Z)-octadeca-9,12-dienoate	1.99033	0.00924922	0.391255	-1.35382
ADENOSINE-5'-DIPHOSPHOGLUCOSE (ADP alpha-D-glucoside)	0.361363	0.0286034	0.419019	-1.25491
9Z-Octadecenoic Acid :: Fatty Acyls :: Lipids :: (Z)-octadec-9-enoic acid	1.03689	0.0267101	0.426248	-1.23024
ADP :: Purine Nucleotides :: Polar Metabolites :: [(2R,3S,4R,5R)-5-(6-aminopurin-9-yl)-3,4-dihydroxyoxolan-2-yl]methyl phosphono hydrogen phosphate	2.21013	0.0029954	0.441649	-1.17903
Allose :: Mono- and Disaccharides :: Polar Metabolites :: (3R,4R,5S,6R)-6-(hydroxymethyl)oxane-2,3,4,5-tetrol	1.52119	0.00326095	2.17936	1.12391
CYTIDINE	2.49821	0.000445845	2.39886	1.26235
N-ACETYL-D-GALACTOSAMINE	2.50997	0.00129395	9.73358	3.28297
Alpha-Aminoadipate :: Carboxylic Acids :: Polar Metabolites :: (2S)-2-aminohexanedioic acid	4.56341	0.00784308	22.5099	4.49249
