# Supplementary material for: Bacterial cell cycle control by citrate synthase independent of enzymatic activity
Source: eLife. 2020 Mar 9;9:e52272. doi: 10.7554/eLife.52272 (PMC7083601; doi:10.7554/eLife.52272)
Supplement: Figure 5—source data 1. [file elife-52272-fig5-data1.xlsx]

## Sheet: 20bp
Chromosome	Start	End	Feature	Strand	WT (AIYT-161)	∆citA (AIYT-162)	xylX::relA'-FLAG (AIYT-163)
gi|221232939|ref|NC_011916.1|	1	20	null		6.7332406	5.6009727	7.8589807
gi|221232939|ref|NC_011916.1|	21	40	null		12.7710285	10.910228	14.55179
gi|221232939|ref|NC_011916.1|	41	60	null		19.75716	17.619726	22.968504
gi|221232939|ref|NC_011916.1|	61	80	null		24.846605	24.679287	28.900768
gi|221232939|ref|NC_011916.1|	81	100	null		25.225943	26.079529	31.38522
gi|221232939|ref|NC_011916.1|	101	120	null		33.286865	37.339817	41.32303
gi|221232939|ref|NC_011916.1|	121	140	null		35.689335	40.256992	42.33709
gi|221232939|ref|NC_011916.1|	141	160	null		42.7703	48.716793	48.674976
gi|221232939|ref|NC_011916.1|	161	180	null		44.540543	49.1252	48.320057
gi|221232939|ref|NC_011916.1|	181	200	null		37.775692	42.649075	40.35967
gi|221232939|ref|NC_011916.1|	201	220	CC_0001	+	33.79265	36.756382	37.216076
gi|221232939|ref|NC_011916.1|	221	240	CC_0001	+	25.352388	27.246399	27.886705
gi|221232939|ref|NC_011916.1|	241	260	CC_0001	+	22.444136	22.22886	24.844519
gi|221232939|ref|NC_011916.1|	261	280	CC_0001	+	20.19972	19.486717	21.295301
gi|221232939|ref|NC_011916.1|	281	300	CC_0001	+	21.527403	19.253344	20.179834
gi|221232939|ref|NC_011916.1|	301	320	CC_0001	+	22.602192	19.545061	21.90374
gi|221232939|ref|NC_011916.1|	321	340	CC_0001	+	24.372435	21.237022	24.743113
gi|221232939|ref|NC_011916.1|	341	360	CC_0001	+	24.846605	21.587082	26.213503
gi|221232939|ref|NC_011916.1|	361	380	CC_0001	+	22.98153	20.303526	24.945925
gi|221232939|ref|NC_011916.1|	381	400	CC_0001	+	23.550535	21.120335	24.286785
gi|221232939|ref|NC_011916.1|	401	420	CC_0001	+	21.211288	17.969788	20.636162
gi|221232939|ref|NC_011916.1|	421	440	CC_0001	+	22.949919	19.195	20.737568
gi|221232939|ref|NC_011916.1|	441	460	CC_0001	+	19.030098	18.378191	16.985538
gi|221232939|ref|NC_011916.1|	461	480	CC_0001	+	20.041664	19.253344	17.948898
gi|221232939|ref|NC_011916.1|	481	500	CC_0001	+	18.208199	17.211323	16.17429
gi|221232939|ref|NC_011916.1|	501	520	CC_0001	+	18.01853	16.102797	16.529211
gi|221232939|ref|NC_011916.1|	521	540	CC_0001	+	18.777206	16.33617	14.856009
gi|221232939|ref|NC_011916.1|	541	560	CC_0001	+	16.91213	15.811079	13.588431
gi|221232939|ref|NC_011916.1|	561	580	CC_0001	+	17.828861	15.344332	14.247571
gi|221232939|ref|NC_011916.1|	581	600	CC_0001	+	17.892084	14.760897	16.072884
gi|221232939|ref|NC_011916.1|	601	620	CC_0001	+	16.121843	13.185623	15.261633
gi|221232939|ref|NC_011916.1|	621	640	CC_0001	+	16.659239	14.294149	15.971477
gi|221232939|ref|NC_011916.1|	641	660	CC_0001	+	16.279902	14.702554	15.160227
gi|221232939|ref|NC_011916.1|	661	680	CC_0001	+	15.868952	14.352492	14.247571
gi|221232939|ref|NC_011916.1|	681	700	CC_0001	+	15.742506	13.827401	13.841947
gi|221232939|ref|NC_011916.1|	701	720	CC_0001	+	16.311512	12.835563	14.146165
gi|221232939|ref|NC_011916.1|	721	740	CC_0001	+	14.952219	12.660532	13.0814
gi|221232939|ref|NC_011916.1|	741	760	CC_0001	+	18.176588	15.519362	16.02218
gi|221232939|ref|NC_011916.1|	761	780	CC_0001	+	17.449524	13.535685	15.109524
gi|221232939|ref|NC_011916.1|	781	800	CC_0001	+	19.061708	14.8775835	15.36304
gi|221232939|ref|NC_011916.1|	801	820	CC_0001	+	18.524315	14.352492	13.689837
gi|221232939|ref|NC_011916.1|	821	840	CC_0001	+	17.923697	14.002432	13.284212
gi|221232939|ref|NC_011916.1|	841	860	CC_0001	+	18.113365	14.64421	14.044759
gi|221232939|ref|NC_011916.1|	861	880	CC_0001	+	17.038576	14.702554	13.436321
gi|221232939|ref|NC_011916.1|	881	900	CC_0001	+	17.670805	14.819241	14.196868
gi|221232939|ref|NC_011916.1|	901	920	CC_0001	+	18.23981	15.227645	16.377102
gi|221232939|ref|NC_011916.1|	921	940	CC_0001	+	19.693937	17.444696	18.15171
gi|221232939|ref|NC_011916.1|	941	960	CC_0001	+	21.780294	19.370031	19.419287
gi|221232939|ref|NC_011916.1|	961	980	CC_0001	+	23.898262	20.18684	20.534756
gi|221232939|ref|NC_011916.1|	981	1000	CC_0001	+	20.642282	17.152979	16.83343
gi|221232939|ref|NC_011916.1|	1001	1020	CC_0001	+	19.75716	16.277826	16.83343
gi|221232939|ref|NC_011916.1|	1021	1040	CC_0001	+	19.472658	15.927766	15.9207735
gi|221232939|ref|NC_011916.1|	1041	1060	CC_0001	+	19.820383	15.752736	16.123587
gi|221232939|ref|NC_011916.1|	1061	1080	CC_0001	+	19.377823	14.8775835	15.971477
gi|221232939|ref|NC_011916.1|	1081	1100	CC_0001	+	17.417913	11.668694	13.0814
gi|221232939|ref|NC_011916.1|	1101	1120	CC_0001	+	17.449524	12.310472	13.334915
gi|221232939|ref|NC_011916.1|	1121	1140	CC_0002	+	15.805729	10.910228	11.611011
gi|221232939|ref|NC_011916.1|	1141	1160	CC_0002	+	16.596016	13.30231	15.008118
gi|221232939|ref|NC_011916.1|	1161	1180	CC_0002	+	17.165022	13.652371	16.326399
gi|221232939|ref|NC_011916.1|	1181	1200	CC_0002	+	17.070187	15.577705	16.579914
gi|221232939|ref|NC_011916.1|	1201	1220	CC_0002	+	18.081753	15.461019	16.427805
gi|221232939|ref|NC_011916.1|	1221	1240	CC_0002	+	18.587538	16.744576	15.717961
gi|221232939|ref|NC_011916.1|	1241	1260	CC_0002	+	18.303034	16.219484	14.602493
gi|221232939|ref|NC_011916.1|	1261	1280	CC_0002	+	18.01853	16.802917	14.501087
gi|221232939|ref|NC_011916.1|	1281	1300	CC_0002	+	18.808817	16.33617	14.399681
gi|221232939|ref|NC_011916.1|	1301	1320	CC_0002	+	18.682371	13.185623	11.864526
gi|221232939|ref|NC_011916.1|	1321	1340	CC_0002	+	19.09332	13.710714	13.334915
gi|221232939|ref|NC_011916.1|	1341	1360	CC_0002	+	18.524315	14.119119	12.777182
gi|221232939|ref|NC_011916.1|	1361	1380	CC_0002	+	18.87204	16.102797	14.8053055
gi|221232939|ref|NC_011916.1|	1381	1400	CC_0002	+	18.492702	17.386353	15.717961
gi|221232939|ref|NC_011916.1|	1401	1420	CC_0002	+	18.587538	17.911444	15.261633
gi|221232939|ref|NC_011916.1|	1421	1440	CC_0002	+	19.061708	17.328009	16.529211
gi|221232939|ref|NC_011916.1|	1441	1460	CC_0002	+	18.745594	17.036293	15.464446
gi|221232939|ref|NC_011916.1|	1461	1480	CC_0002	+	19.409435	17.619726	14.754602
gi|221232939|ref|NC_011916.1|	1481	1500	CC_0002	+	19.377823	17.50304	15.160227
gi|221232939|ref|NC_011916.1|	1501	1520	CC_0002	+	18.334646	15.752736	14.095462
gi|221232939|ref|NC_011916.1|	1521	1540	CC_0002	+	20.673893	16.744576	17.137648
gi|221232939|ref|NC_011916.1|	1541	1560	CC_0002	+	18.366257	14.410836	15.667258
gi|221232939|ref|NC_011916.1|	1561	1580	CC_0002	+	19.662327	15.285988	16.83343
gi|221232939|ref|NC_011916.1|	1581	1600	CC_0002	+	19.3146	14.760897	16.934835
gi|221232939|ref|NC_011916.1|	1601	1620	CC_0002	+	17.670805	14.060776	15.008118
gi|221232939|ref|NC_011916.1|	1621	1640	CC_0002	+	19.662327	15.285988	15.819367
gi|221232939|ref|NC_011916.1|	1641	1660	CC_0002	+	17.923697	14.002432	13.334915
gi|221232939|ref|NC_011916.1|	1661	1680	CC_0002	+	18.208199	15.811079	14.146165
gi|221232939|ref|NC_011916.1|	1681	1700	CC_0002	+	19.061708	16.16114	13.994056
gi|221232939|ref|NC_011916.1|	1701	1720	CC_0002	+	19.788773	18.319849	14.348977
gi|221232939|ref|NC_011916.1|	1721	1740	CC_0003	+	20.38939	19.428375	15.261633
gi|221232939|ref|NC_011916.1|	1741	1760	CC_0003	+	21.148066	19.895123	14.8053055
gi|221232939|ref|NC_011916.1|	1761	1780	CC_0003	+	21.969963	19.311687	16.072884
gi|221232939|ref|NC_011916.1|	1781	1800	CC_0003	+	19.946829	16.569544	15.971477
gi|221232939|ref|NC_011916.1|	1801	1820	CC_0003	+	21.432568	18.319849	17.64468
gi|221232939|ref|NC_011916.1|	1821	1840	CC_0003	+	21.337734	17.911444	16.123587
gi|221232939|ref|NC_011916.1|	1841	1860	CC_0003	+	20.737116	18.319849	15.819367
gi|221232939|ref|NC_011916.1|	1861	1880	CC_0003	+	20.926785	18.378191	16.072884
gi|221232939|ref|NC_011916.1|	1881	1900	CC_0003	+	15.995398	14.702554	13.537728
gi|221232939|ref|NC_011916.1|	1901	1920	CC_0003	+	18.619148	16.452858	16.884132
gi|221232939|ref|NC_011916.1|	1921	1940	CC_0003	+	18.303034	14.64421	15.261633
gi|221232939|ref|NC_011916.1|	1941	1960	CC_0003	+	18.87204	16.802917	15.21093
gi|221232939|ref|NC_011916.1|	1961	1980	CC_0003	+	17.57597	15.811079	14.399681
gi|221232939|ref|NC_011916.1|	1981	2000	CC_0003	+	16.374735	14.935927	12.27015
gi|221232939|ref|NC_011916.1|	2001	2020	CC_0003	+	14.478047	12.485502	10.799761
gi|221232939|ref|NC_011916.1|	2021	2040	CC_0003	+	14.256767	11.843723	9.734995
gi|221232939|ref|NC_011916.1|	2041	2060	CC_0003	+	13.719373	10.560167	9.126558
gi|221232939|ref|NC_011916.1|	2061	2080	CC_0003	+	11.885908	9.860045	8.112496
gi|221232939|ref|NC_011916.1|	2081	2100	CC_0003	+	10.431781	9.218267	7.8082776
gi|221232939|ref|NC_011916.1|	2101	2120	CC_0003	+	8.218979	6.8261857	5.374529
gi|221232939|ref|NC_011916.1|	2121	2140	CC_0003	+	7.270635	6.7094984	6.2871847
gi|221232939|ref|NC_011916.1|	2141	2160	CC_0003	+	7.7448072	6.7678423	6.439294
gi|221232939|ref|NC_011916.1|	2161	2180	CC_0003	+	9.641495	7.8180246	7.8589807
gi|221232939|ref|NC_011916.1|	2181	2200	CC_0003	+	11.348514	9.043238	8.771636
gi|221232939|ref|NC_011916.1|	2201	2220	CC_0003	+	11.506571	8.984894	8.873043
gi|221232939|ref|NC_011916.1|	2221	2240	CC_0003	+	13.245201	9.685016	10.089917
gi|221232939|ref|NC_011916.1|	2241	2260	CC_0003	+	13.940653	9.918389	10.647651
gi|221232939|ref|NC_011916.1|	2261	2280	CC_0003	+	14.446436	11.260289	11.408197
gi|221232939|ref|NC_011916.1|	2281	2300	CC_0003	+	15.426392	12.485502	11.76312
gi|221232939|ref|NC_011916.1|	2301	2320	CC_0003	+	14.730939	12.835563	11.661714
gi|221232939|ref|NC_011916.1|	2321	2340	CC_0003	+	15.268334	12.310472	11.357494
gi|221232939|ref|NC_011916.1|	2341	2360	CC_0003	+	15.268334	12.485502	10.749058
gi|221232939|ref|NC_011916.1|	2361	2380	CC_0003	+	14.794162	12.310472	9.988511
gi|221232939|ref|NC_011916.1|	2381	2400	CC_0003	+	14.509659	11.902067	9.025152
gi|221232939|ref|NC_011916.1|	2401	2420	CC_0003	+	13.43487	11.376976	8.923746
gi|221232939|ref|NC_011916.1|	2421	2440	CC_0003	+	13.814207	13.243967	9.177261
gi|221232939|ref|NC_011916.1|	2441	2460	CC_0003	+	15.363169	14.294149	11.154682
gi|221232939|ref|NC_011916.1|	2461	2480	CC_0003	+	14.952219	14.060776	11.661714
gi|221232939|ref|NC_011916.1|	2481	2500	CC_0003	+	16.185066	13.944089	12.726479
gi|221232939|ref|NC_011916.1|	2501	2520	CC_0003	+	14.98383	13.12728	12.371556
gi|221232939|ref|NC_011916.1|	2521	2540	CC_0003	+	15.2051115	13.068936	13.030697
gi|221232939|ref|NC_011916.1|	2541	2560	CC_0003	+	15.900563	13.068936	13.385618
gi|221232939|ref|NC_011916.1|	2561	2580	CC_0004	+	16.69085	14.294149	14.196868
gi|221232939|ref|NC_011916.1|	2581	2600	CC_0004	+	17.57597	14.352492	13.791244
gi|221232939|ref|NC_011916.1|	2601	2620	CC_0004	+	19.061708	15.98611	14.348977
gi|221232939|ref|NC_011916.1|	2621	2640	CC_0004	+	18.461092	15.227645	13.233509
gi|221232939|ref|NC_011916.1|	2641	2660	CC_0004	+	19.851995	16.102797	15.768664
gi|221232939|ref|NC_011916.1|	2661	2680	CC_0004	+	21.274511	17.911444	17.948898
gi|221232939|ref|NC_011916.1|	2681	2700	CC_0004	+	18.903652	14.994271	16.579914
gi|221232939|ref|NC_011916.1|	2701	2720	CC_0004	+	19.251377	14.585867	17.086945
gi|221232939|ref|NC_011916.1|	2721	2740	CC_0004	+	19.28299	12.893906	14.298274
gi|221232939|ref|NC_011916.1|	2741	2760	CC_0004	+	19.441046	14.060776	14.247571
gi|221232939|ref|NC_011916.1|	2761	2780	CC_0004	+	20.104887	14.994271	14.196868
gi|221232939|ref|NC_011916.1|	2781	2800	CC_0004	+	19.377823	14.8775835	14.298274
gi|221232939|ref|NC_011916.1|	2801	2820	CC_0004	+	19.377823	15.577705	15.008118
gi|221232939|ref|NC_011916.1|	2821	2840	CC_0004	+	18.682371	14.352492	15.058821
gi|221232939|ref|NC_011916.1|	2841	2860	CC_0004	+	18.176588	13.5940275	16.377102
gi|221232939|ref|NC_011916.1|	2861	2880	CC_0004	+	18.492702	12.427158	15.413743
gi|221232939|ref|NC_011916.1|	2881	2900	CC_0004	+	18.208199	12.835563	14.501087
gi|221232939|ref|NC_011916.1|	2901	2920	CC_0004	+	16.975353	12.368814	13.233509
gi|221232939|ref|NC_011916.1|	2921	2940	CC_0004	+	17.481136	12.135441	12.016635
gi|221232939|ref|NC_011916.1|	2941	2960	CC_0004	+	16.627626	13.5940275	11.408197
gi|221232939|ref|NC_011916.1|	2961	2980	CC_0004	+	17.923697	15.927766	11.560307
gi|221232939|ref|NC_011916.1|	2981	3000	CC_0004	+	17.57597	15.344332	12.168744
gi|221232939|ref|NC_011916.1|	3001	3020	CC_0004	+	19.251377	16.452858	14.856009
gi|221232939|ref|NC_011916.1|	3021	3040	CC_0004	+	20.673893	16.919605	15.87007
gi|221232939|ref|NC_011916.1|	3041	3060	CC_0004	+	22.254467	16.569544	17.086945
gi|221232939|ref|NC_011916.1|	3061	3080	CC_0004	+	23.360867	19.136658	17.948898
gi|221232939|ref|NC_011916.1|	3081	3100	CC_0004	+	24.72016	20.011808	19.31788
gi|221232939|ref|NC_011916.1|	3101	3120	CC_0004	+	23.297644	22.462234	19.216475
gi|221232939|ref|NC_011916.1|	3121	3140	CC_0004	+	30.283775	27.94652	25.098036
gi|221232939|ref|NC_011916.1|	3141	3160	CC_0004	+	30.979229	27.888178	24.03327
gi|221232939|ref|NC_011916.1|	3161	3180	null		31.168898	27.888178	24.083973
gi|221232939|ref|NC_011916.1|	3181	3200	dnaQ	+	31.706291	27.129711	24.337488
gi|221232939|ref|NC_011916.1|	3201	3220	dnaQ	+	32.68625	29.405107	25.300848
gi|221232939|ref|NC_011916.1|	3221	3240	dnaQ	+	35.78417	33.722523	27.683893
gi|221232939|ref|NC_011916.1|	3241	3260	dnaQ	+	35.08872	33.430805	26.467018
gi|221232939|ref|NC_011916.1|	3261	3280	dnaQ	+	38.40792	35.647858	28.495142
gi|221232939|ref|NC_011916.1|	3281	3300	dnaQ	+	37.396355	31.855532	28.241627
gi|221232939|ref|NC_011916.1|	3301	3320	dnaQ	+	41.252953	33.430805	30.87819
gi|221232939|ref|NC_011916.1|	3321	3340	dnaQ	+	38.56598	30.280258	28.444439
gi|221232939|ref|NC_011916.1|	3341	3360	dnaQ	+	36.416397	29.346764	27.379675
gi|221232939|ref|NC_011916.1|	3361	3380	dnaQ	+	35.057106	26.60462	25.706472
gi|221232939|ref|NC_011916.1|	3381	3400	dnaQ	+	32.306908	23.74579	23.931864
gi|221232939|ref|NC_011916.1|	3401	3420	dnaQ	+	29.08254	21.645426	21.39671
gi|221232939|ref|NC_011916.1|	3421	3440	dnaQ	+	26.838127	20.595243	19.824913
gi|221232939|ref|NC_011916.1|	3441	3460	dnaQ	+	25.763338	19.486717	20.027725
gi|221232939|ref|NC_011916.1|	3461	3480	dnaQ	+	24.688549	20.420214	19.92632
gi|221232939|ref|NC_011916.1|	3481	3500	dnaQ	+	24.593714	20.886961	20.636162
gi|221232939|ref|NC_011916.1|	3501	3520	dnaQ	+	24.625326	21.645426	20.78827
gi|221232939|ref|NC_011916.1|	3521	3540	dnaQ	+	24.08793	20.36187	19.267178
gi|221232939|ref|NC_011916.1|	3541	3560	dnaQ	+	24.53049	19.136658	19.31788
gi|221232939|ref|NC_011916.1|	3561	3580	dnaQ	+	23.771816	19.253344	18.15171
gi|221232939|ref|NC_011916.1|	3581	3600	dnaQ	+	22.538969	18.028131	18.608038
gi|221232939|ref|NC_011916.1|	3601	3620	dnaQ	+	22.538969	20.245182	19.31788
gi|221232939|ref|NC_011916.1|	3621	3640	dnaQ	+	21.811905	20.18684	19.165771
gi|221232939|ref|NC_011916.1|	3641	3660	dnaQ	+	21.274511	19.603405	16.326399
gi|221232939|ref|NC_011916.1|	3661	3680	dnaQ	+	22.633804	20.770273	17.948898
gi|221232939|ref|NC_011916.1|	3681	3700	dnaQ	+	23.171198	19.01997	17.492569
gi|221232939|ref|NC_011916.1|	3701	3720	dnaQ	+	22.3493	19.195	17.593975
gi|221232939|ref|NC_011916.1|	3721	3740	dnaQ	+	22.886696	19.195	16.83343
gi|221232939|ref|NC_011916.1|	3741	3760	dnaQ	+	20.737116	17.094635	15.058821
gi|221232939|ref|NC_011916.1|	3761	3780	dnaQ	+	21.211288	17.736414	15.819367
gi|221232939|ref|NC_011916.1|	3781	3800	dnaQ	+	21.05323	17.211323	16.224993
gi|221232939|ref|NC_011916.1|	3801	3820	dnaQ	+	22.001574	18.436535	18.709444
gi|221232939|ref|NC_011916.1|	3821	3840	dnaQ	+	20.484224	19.195	18.30382
gi|221232939|ref|NC_011916.1|	3841	3860	dnaQ	+	21.68546	19.253344	18.202414
gi|221232939|ref|NC_011916.1|	3861	3880	dnaQ	+	19.346212	16.861261	15.768664
gi|221232939|ref|NC_011916.1|	3881	3900	dnaQ	+	19.630714	16.569544	15.616555
gi|221232939|ref|NC_011916.1|	3901	3920	dnaQ	+	20.452614	17.211323	17.543272
gi|221232939|ref|NC_011916.1|	3921	3940	null		18.334646	15.402675	15.819367
gi|221232939|ref|NC_011916.1|	3941	3960	null		18.808817	15.402675	15.413743
gi|221232939|ref|NC_011916.1|	3961	3980	null		18.366257	14.294149	15.109524
gi|221232939|ref|NC_011916.1|	3981	4000	null		20.863562	16.044453	17.948898
gi|221232939|ref|NC_011916.1|	4001	4020	null		20.326168	16.452858	19.267178
gi|221232939|ref|NC_011916.1|	4021	4040	CC_0006	+	20.673893	16.394514	20.484053
gi|221232939|ref|NC_011916.1|	4041	4060	CC_0006	+	21.46418	17.269667	19.672804
gi|221232939|ref|NC_011916.1|	4061	4080	CC_0006	+	22.823473	19.136658	20.991083
gi|221232939|ref|NC_011916.1|	4081	4100	CC_0006	+	24.878218	22.40389	21.346006
gi|221232939|ref|NC_011916.1|	4101	4120	CC_0006	+	26.522013	23.512417	21.802334
gi|221232939|ref|NC_011916.1|	4121	4140	CC_0006	+	28.039362	25.146034	22.106552
gi|221232939|ref|NC_011916.1|	4141	4160	CC_0006	+	27.3123	22.928982	21.75163
gi|221232939|ref|NC_011916.1|	4161	4180	CC_0006	+	24.024708	20.36187	20.78827
gi|221232939|ref|NC_011916.1|	4181	4200	CC_0006	+	22.697027	21.295364	20.889677
gi|221232939|ref|NC_011916.1|	4201	4220	CC_0006	+	21.843517	20.886961	19.977022
gi|221232939|ref|NC_011916.1|	4221	4240	CC_0006	+	23.740204	23.2207	19.824913
gi|221232939|ref|NC_011916.1|	4241	4260	CC_0006	+	22.31769	20.711931	19.165771
gi|221232939|ref|NC_011916.1|	4261	4280	CC_0006	+	21.432568	21.003649	18.506632
gi|221232939|ref|NC_011916.1|	4281	4300	CC_0006	+	21.46418	20.245182	17.847492
gi|221232939|ref|NC_011916.1|	4301	4320	CC_0006	+	21.432568	18.378191	16.326399
gi|221232939|ref|NC_011916.1|	4321	4340	CC_0006	+	22.855083	19.486717	17.79679
gi|221232939|ref|NC_011916.1|	4341	4360	CC_0006	+	21.432568	17.211323	17.593975
gi|221232939|ref|NC_011916.1|	4361	4380	CC_0006	+	21.05323	16.861261	18.405226
gi|221232939|ref|NC_011916.1|	4381	4400	CC_0006	+	18.42948	16.744576	16.782726
gi|221232939|ref|NC_011916.1|	4401	4420	CC_0006	+	17.765638	15.636049	15.058821
gi|221232939|ref|NC_011916.1|	4421	4440	CC_0006	+	19.978441	16.802917	16.377102
gi|221232939|ref|NC_011916.1|	4441	4460	CC_0006	+	19.409435	14.527523	14.754602
gi|221232939|ref|NC_011916.1|	4461	4480	CC_0006	+	19.535881	14.994271	15.36304
gi|221232939|ref|NC_011916.1|	4481	4500	CC_0006	+	21.527403	17.444696	16.02218
gi|221232939|ref|NC_011916.1|	4501	4520	CC_0006	+	21.49579	16.277826	15.768664
gi|221232939|ref|NC_011916.1|	4521	4540	CC_0006	+	20.38939	15.752736	15.160227
gi|221232939|ref|NC_011916.1|	4541	4560	CC_0006	+	19.788773	15.869423	15.413743
gi|221232939|ref|NC_011916.1|	4561	4580	CC_0006	+	18.935263	17.794758	14.146165
gi|221232939|ref|NC_011916.1|	4581	4600	CC_0006	+	20.863562	19.136658	15.87007
gi|221232939|ref|NC_011916.1|	4601	4620	CC_0006	+	23.740204	23.04567	18.354523
gi|221232939|ref|NC_011916.1|	4621	4640	CC_0006	+	25.13111	23.104013	20.94038
gi|221232939|ref|NC_011916.1|	4641	4660	CC_0006	+	24.593714	21.295364	21.75163
gi|221232939|ref|NC_011916.1|	4661	4680	CC_0006	+	24.562103	23.104013	24.134676
gi|221232939|ref|NC_011916.1|	4681	4700	CC_0006	+	26.774904	24.679287	24.641706
gi|221232939|ref|NC_011916.1|	4701	4720	CC_0006	+	28.19742	28.93836	27.176863
gi|221232939|ref|NC_011916.1|	4721	4740	CC_0006	+	35.468056	42.24067	32.34858
gi|221232939|ref|NC_011916.1|	4741	4760	CC_0006	+	38.18664	48.075016	34.83303
gi|221232939|ref|NC_011916.1|	4761	4780	CC_0006	+	47.006237	64.002785	43.85818
gi|221232939|ref|NC_011916.1|	4781	4800	CC_0006	+	56.363228	78.88036	57.75083
gi|221232939|ref|NC_011916.1|	4801	4820	CC_0006	+	62.527462	85.35649	67.68864
gi|221232939|ref|NC_011916.1|	4821	4840	null		69.29231	89.20716	75.59832
gi|221232939|ref|NC_011916.1|	4841	4860	null		87.721794	114.41154	104.49909
gi|221232939|ref|NC_011916.1|	4861	4880	null		94.391815	119.89582	114.18338
gi|221232939|ref|NC_011916.1|	4881	4900	null		111.71489	149.5343	150.74033
gi|221232939|ref|NC_011916.1|	4901	4920	null		123.537575	162.54489	176.39609
gi|221232939|ref|NC_011916.1|	4921	4940	null		121.482834	162.77827	177.96788
gi|221232939|ref|NC_011916.1|	4941	4960	CC_0007	+	123.6008	161.0863	175.78764
gi|221232939|ref|NC_011916.1|	4961	4980	CC_0007	+	108.99631	147.72566	150.5375
gi|221232939|ref|NC_011916.1|	4981	5000	CC_0007	+	98.59614	133.78157	130.9154
gi|221232939|ref|NC_011916.1|	5001	5020	CC_0007	+	89.492035	121.93784	116.0087
gi|221232939|ref|NC_011916.1|	5021	5040	CC_0007	+	84.90837	112.19449	108.91026
gi|221232939|ref|NC_011916.1|	5041	5060	CC_0007	+	78.17513	104.43481	100.594955
gi|221232939|ref|NC_011916.1|	5061	5080	CC_0007	+	75.99394	103.85137	102.16675
gi|221232939|ref|NC_011916.1|	5081	5100	CC_0007	+	64.70866	83.31447	89.33887
gi|221232939|ref|NC_011916.1|	5101	5120	CC_0007	+	62.21135	77.88853	86.04316
gi|221232939|ref|NC_011916.1|	5121	5140	CC_0007	+	55.414886	60.035427	73.21528
gi|221232939|ref|NC_011916.1|	5141	5160	CC_0007	+	55.067158	56.943222	69.20973
gi|221232939|ref|NC_011916.1|	5161	5180	CC_0007	+	52.66469	56.359787	67.232315
gi|221232939|ref|NC_011916.1|	5181	5200	CC_0007	+	49.535152	49.358574	59.728252
gi|221232939|ref|NC_011916.1|	5201	5220	CC_0007	+	38.755646	38.39	48.776382
gi|221232939|ref|NC_011916.1|	5221	5240	CC_0007	+	31.89596	29.696825	38.483654
gi|221232939|ref|NC_011916.1|	5241	5260	null		28.102585	24.095852	31.131704
gi|221232939|ref|NC_011916.1|	5261	5280	null		30.536669	23.39573	32.145767
gi|221232939|ref|NC_011916.1|	5281	5300	null		27.881306	21.120335	33.109123
gi|221232939|ref|NC_011916.1|	5301	5320	null		28.60837	22.520578	34.63022
gi|221232939|ref|NC_011916.1|	5321	5340	null		32.52819	27.363085	42.083572
gi|221232939|ref|NC_011916.1|	5341	5360	null		39.545933	33.722523	49.23271
gi|221232939|ref|NC_011916.1|	5361	5380	null		48.14425	42.007298	63.7338
gi|221232939|ref|NC_011916.1|	5381	5400	null		52.85436	44.57441	73.51949
gi|221232939|ref|NC_011916.1|	5401	5420	null		63.697086	59.62702	98.1105
gi|221232939|ref|NC_011916.1|	5421	5440	null		68.53364	65.81143	110.73557
gi|221232939|ref|NC_011916.1|	5441	5460	null		73.08569	72.69596	118.18893
gi|221232939|ref|NC_011916.1|	5461	5480	null		75.36172	77.94687	125.18596
gi|221232939|ref|NC_011916.1|	5481	5500	null		92.02095	106.301796	166.35687
gi|221232939|ref|NC_011916.1|	5501	5520	null		110.92461	125.78851	196.47452
gi|221232939|ref|NC_011916.1|	5521	5540	null		112.82129	129.52249	200.42935
gi|221232939|ref|NC_011916.1|	5541	5560	null		123.34791	143.17487	217.567
gi|221232939|ref|NC_011916.1|	5561	5580	null		111.90456	124.9717	183.0382
gi|221232939|ref|NC_011916.1|	5581	5600	null		112.91612	126.54698	181.97343
gi|221232939|ref|NC_011916.1|	5601	5620	null		107.953125	120.30423	172.99898
gi|221232939|ref|NC_011916.1|	5621	5640	dnaA	+	77.54291	81.85588	130.96611
gi|221232939|ref|NC_011916.1|	5641	5660	dnaA	+	68.438805	72.69596	113.92987
gi|221232939|ref|NC_011916.1|	5661	5680	dnaA	+	58.923756	62.13579	101.10198
gi|221232939|ref|NC_011916.1|	5681	5700	dnaA	+	52.316963	53.617645	94.611984
gi|221232939|ref|NC_011916.1|	5701	5720	dnaA	+	47.132683	51.16722	84.268555
gi|221232939|ref|NC_011916.1|	5721	5740	dnaA	+	45.014717	48.95017	78.691216
gi|221232939|ref|NC_011916.1|	5741	5760	dnaA	+	37.649246	42.06564	66.62387
gi|221232939|ref|NC_011916.1|	5761	5780	dnaA	+	37.206684	44.45772	65.10278
gi|221232939|ref|NC_011916.1|	5781	5800	dnaA	+	33.508144	36.87307	58.20716
gi|221232939|ref|NC_011916.1|	5801	5820	dnaA	+	35.81578	38.03994	55.92552
gi|221232939|ref|NC_011916.1|	5821	5840	dnaA	+	34.993885	37.339817	50.55099
gi|221232939|ref|NC_011916.1|	5841	5860	dnaA	+	34.772602	37.86491	47.965134
gi|221232939|ref|NC_011916.1|	5861	5880	dnaA	+	33.16042	34.247616	45.024353
gi|221232939|ref|NC_011916.1|	5881	5900	dnaA	+	32.49658	35.414486	43.50326
gi|221232939|ref|NC_011916.1|	5901	5920	dnaA	+	31.706291	32.263935	40.10615
gi|221232939|ref|NC_011916.1|	5921	5940	dnaA	+	30.852783	31.680502	37.976624
gi|221232939|ref|NC_011916.1|	5941	5960	dnaA	+	29.777992	32.380623	36.10061
gi|221232939|ref|NC_011916.1|	5961	5980	dnaA	+	31.611458	33.78087	38.331543
gi|221232939|ref|NC_011916.1|	5981	6000	dnaA	+	29.430267	31.15541	36.65834
gi|221232939|ref|NC_011916.1|	6001	6020	dnaA	+	32.433357	33.080746	37.317482
gi|221232939|ref|NC_011916.1|	6021	6040	dnaA	+	33.697815	33.9559	37.672405
gi|221232939|ref|NC_011916.1|	6041	6060	dnaA	+	34.51971	35.18111	37.875217
gi|221232939|ref|NC_011916.1|	6061	6080	dnaA	+	33.79265	34.072586	33.971077
gi|221232939|ref|NC_011916.1|	6081	6100	dnaA	+	34.67777	34.247616	32.55139
gi|221232939|ref|NC_011916.1|	6101	6120	dnaA	+	34.140373	31.097067	31.486626
gi|221232939|ref|NC_011916.1|	6121	6140	dnaA	+	34.361652	29.11339	33.565453
gi|221232939|ref|NC_011916.1|	6141	6160	dnaA	+	31.737904	27.713146	35.897797
gi|221232939|ref|NC_011916.1|	6161	6180	dnaA	+	30.947617	27.59646	35.035843
gi|221232939|ref|NC_011916.1|	6181	6200	dnaA	+	32.33852	30.980381	34.985138
gi|221232939|ref|NC_011916.1|	6201	6220	dnaA	+	33.88748	32.84737	37.723106
gi|221232939|ref|NC_011916.1|	6221	6240	dnaA	+	36.953793	38.273315	42.083572
gi|221232939|ref|NC_011916.1|	6241	6260	dnaA	+	35.08872	34.83105	39.59912
gi|221232939|ref|NC_011916.1|	6261	6280	dnaA	+	33.097195	33.722523	36.759747
gi|221232939|ref|NC_011916.1|	6281	6300	dnaA	+	31.168898	31.738846	33.15983
gi|221232939|ref|NC_011916.1|	6301	6320	dnaA	+	33.697815	33.722523	33.464046
gi|221232939|ref|NC_011916.1|	6321	6340	dnaA	+	33.539757	32.32228	31.486626
gi|221232939|ref|NC_011916.1|	6341	6360	dnaA	+	33.097195	31.388784	32.652798
gi|221232939|ref|NC_011916.1|	6361	6380	dnaA	+	29.746382	28.821672	31.942953
gi|221232939|ref|NC_011916.1|	6381	6400	dnaA	+	29.96766	31.33044	33.311935
gi|221232939|ref|NC_011916.1|	6401	6420	dnaA	+	27.565191	29.521793	30.928892
gi|221232939|ref|NC_011916.1|	6421	6440	dnaA	+	30.441833	33.022404	32.85561
gi|221232939|ref|NC_011916.1|	6441	6460	dnaA	+	27.565191	27.77149	30.320454
gi|221232939|ref|NC_011916.1|	6461	6480	dnaA	+	30.220552	32.14725	32.247173
gi|221232939|ref|NC_011916.1|	6481	6500	dnaA	+	30.884394	32.67234	32.500687
gi|221232939|ref|NC_011916.1|	6501	6520	dnaA	+	30.188942	32.380623	30.979595
gi|221232939|ref|NC_011916.1|	6521	6540	dnaA	+	31.737904	34.364304	31.435923
gi|221232939|ref|NC_011916.1|	6541	6560	dnaA	+	30.694725	32.380623	30.776783
gi|221232939|ref|NC_011916.1|	6561	6580	dnaA	+	29.999273	31.15541	28.596548
gi|221232939|ref|NC_011916.1|	6581	6600	dnaA	+	29.430267	29.521793	28.74866
gi|221232939|ref|NC_011916.1|	6601	6620	dnaA	+	29.777992	30.280258	30.117641
gi|221232939|ref|NC_011916.1|	6621	6640	dnaA	+	26.269121	27.829834	27.430378
gi|221232939|ref|NC_011916.1|	6641	6660	dnaA	+	28.260643	28.529955	27.988111
gi|221232939|ref|NC_011916.1|	6661	6680	dnaA	+	29.999273	30.163572	28.495142
gi|221232939|ref|NC_011916.1|	6681	6700	dnaA	+	31.074062	28.646643	28.951471
gi|221232939|ref|NC_011916.1|	6701	6720	dnaA	+	34.10876	30.80535	29.661314
gi|221232939|ref|NC_011916.1|	6721	6740	dnaA	+	35.910614	33.83921	32.754204
gi|221232939|ref|NC_011916.1|	6741	6760	dnaA	+	33.3817	31.855532	30.371157
gi|221232939|ref|NC_011916.1|	6761	6780	dnaA	+	32.306908	29.871855	29.204987
gi|221232939|ref|NC_011916.1|	6781	6800	dnaA	+	28.924484	25.9045	26.872643
gi|221232939|ref|NC_011916.1|	6801	6820	dnaA	+	25.447224	21.8788	25.199442
gi|221232939|ref|NC_011916.1|	6821	6840	dnaA	+	28.956095	26.137873	26.771236
gi|221232939|ref|NC_011916.1|	6841	6860	dnaA	+	29.335432	28.880016	27.12616
gi|221232939|ref|NC_011916.1|	6861	6880	dnaA	+	32.401745	31.213755	27.988111
gi|221232939|ref|NC_011916.1|	6881	6900	dnaA	+	35.78417	34.364304	28.900768
gi|221232939|ref|NC_011916.1|	6901	6920	dnaA	+	32.907528	33.9559	26.872643
gi|221232939|ref|NC_011916.1|	6921	6940	dnaA	+	35.56289	35.939575	28.799362
gi|221232939|ref|NC_011916.1|	6941	6960	dnaA	+	34.330044	35.414486	30.26975
gi|221232939|ref|NC_011916.1|	6961	6980	dnaA	+	31.990795	30.863693	27.937408
gi|221232939|ref|NC_011916.1|	6981	7000	dnaA	+	32.623024	29.988543	27.481081
gi|221232939|ref|NC_011916.1|	7001	7020	dnaA	+	31.990795	29.638481	28.444439
gi|221232939|ref|NC_011916.1|	7021	7040	dnaA	+	32.654636	29.81351	29.357096
gi|221232939|ref|NC_011916.1|	7041	7060	dnaA	+	32.717857	29.521793	29.712017
gi|221232939|ref|NC_011916.1|	7061	7080	dnaA	+	30.536669	28.93836	27.075457
gi|221232939|ref|NC_011916.1|	7081	7100	dnaA	+	26.174286	24.971004	23.88116
gi|221232939|ref|NC_011916.1|	7101	7120	dnaA	+	25.384	23.454073	22.461473
gi|221232939|ref|NC_011916.1|	7121	7140	null		23.297644	20.770273	20.991083
gi|221232939|ref|NC_011916.1|	7141	7160	null		24.08793	18.086475	21.244598
gi|221232939|ref|NC_011916.1|	7161	7180	alkB	-	26.42718	20.303526	24.438894
gi|221232939|ref|NC_011916.1|	7181	7200	alkB	-	25.320778	18.728252	22.664286
gi|221232939|ref|NC_011916.1|	7201	7220	alkB	-	26.300732	19.311687	22.816395
gi|221232939|ref|NC_011916.1|	7221	7240	alkB	-	26.522013	19.253344	19.46999
gi|221232939|ref|NC_011916.1|	7241	7260	alkB	-	26.01623	19.661749	17.898195
gi|221232939|ref|NC_011916.1|	7261	7280	alkB	-	26.932962	21.52874	19.267178
gi|221232939|ref|NC_011916.1|	7281	7300	alkB	-	25.60528	22.170517	19.77421
gi|221232939|ref|NC_011916.1|	7301	7320	alkB	-	22.633804	19.661749	18.253117
gi|221232939|ref|NC_011916.1|	7321	7340	alkB	-	22.31769	19.661749	18.506632
gi|221232939|ref|NC_011916.1|	7341	7360	alkB	-	20.831951	18.611567	17.239054
gi|221232939|ref|NC_011916.1|	7361	7380	alkB	-	21.337734	19.311687	16.529211
gi|221232939|ref|NC_011916.1|	7381	7400	alkB	-	21.242899	17.269667	14.906712
gi|221232939|ref|NC_011916.1|	7401	7420	alkB	-	19.72555	16.044453	12.6250725
gi|221232939|ref|NC_011916.1|	7421	7440	alkB	-	19.946829	15.577705	13.436321
gi|221232939|ref|NC_011916.1|	7441	7460	alkB	-	17.670805	12.777219	12.523666
gi|221232939|ref|NC_011916.1|	7461	7480	alkB	-	17.955307	14.060776	14.044759
gi|221232939|ref|NC_011916.1|	7481	7500	alkB	-	15.932175	12.485502	11.76312
gi|221232939|ref|NC_011916.1|	7501	7520	alkB	-	17.323078	13.360654	12.777182
gi|221232939|ref|NC_011916.1|	7521	7540	alkB	-	18.23981	14.352492	11.712417
gi|221232939|ref|NC_011916.1|	7541	7560	alkB	-	19.377823	15.636049	12.726479
gi|221232939|ref|NC_011916.1|	7561	7580	alkB	-	19.156544	16.686232	13.639134
gi|221232939|ref|NC_011916.1|	7581	7600	alkB	-	18.87204	16.219484	14.247571
gi|221232939|ref|NC_011916.1|	7601	7620	alkB	-	19.75716	18.553223	16.326399
gi|221232939|ref|NC_011916.1|	7621	7640	alkB	-	19.788773	19.311687	17.137648
gi|221232939|ref|NC_011916.1|	7641	7660	alkB	-	21.02162	20.36187	17.492569
gi|221232939|ref|NC_011916.1|	7661	7680	alkB	-	23.20281	21.412052	18.354523
gi|221232939|ref|NC_011916.1|	7681	7700	alkB	-	23.329256	20.245182	19.115068
gi|221232939|ref|NC_011916.1|	7701	7720	alkB	-	23.898262	19.72009	18.354523
gi|221232939|ref|NC_011916.1|	7721	7740	alkB	-	24.182764	19.078314	18.253117
gi|221232939|ref|NC_011916.1|	7741	7760	alkB	-	22.665415	16.686232	16.630617
gi|221232939|ref|NC_011916.1|	7761	7780	alkB	-	21.02162	15.169301	16.68132
gi|221232939|ref|NC_011916.1|	7781	7800	alkB	-	20.800339	16.16114	17.137648
gi|221232939|ref|NC_011916.1|	7801	7820	null		19.441046	15.577705	15.21093
gi|221232939|ref|NC_011916.1|	7821	7840	null		27.249077	21.470396	16.529211
gi|221232939|ref|NC_011916.1|	7841	7860	null		31.074062	26.721308	17.695383
gi|221232939|ref|NC_011916.1|	7861	7880	null		35.49967	31.33044	18.912256
gi|221232939|ref|NC_011916.1|	7881	7900	null		40.842003	38.915092	20.636162
gi|221232939|ref|NC_011916.1|	7901	7920	null		44.03476	44.107662	19.77421
gi|221232939|ref|NC_011916.1|	7921	7940	null		52.50663	57.23494	22.258661
gi|221232939|ref|NC_011916.1|	7941	7960	null		57.311573	64.23616	23.576942
gi|221232939|ref|NC_011916.1|	7961	7980	null		69.102646	83.547844	28.495142
gi|221232939|ref|NC_011916.1|	7981	8000	null		80.41955	97.95868	32.754204
gi|221232939|ref|NC_011916.1|	8001	8020	null		88.70175	109.86075	34.985138
gi|221232939|ref|NC_011916.1|	8021	8040	null		86.899895	103.968056	34.275295
gi|221232939|ref|NC_011916.1|	8041	8060	null		86.67862	105.54333	32.449986
gi|221232939|ref|NC_011916.1|	8061	8080	null		78.87058	99.76733	31.030298
gi|221232939|ref|NC_011916.1|	8081	8100	null		68.09108	80.8057	25.65577
gi|221232939|ref|NC_011916.1|	8101	8120	null		65.46733	78.47196	24.844519
gi|221232939|ref|NC_011916.1|	8121	8140	null		57.659298	69.83713	23.222021
gi|221232939|ref|NC_011916.1|	8141	8160	null		54.150425	62.835915	21.346006
gi|221232939|ref|NC_011916.1|	8161	8180	dnaK	+	48.491974	55.19292	20.230537
gi|221232939|ref|NC_011916.1|	8181	8200	dnaK	+	44.319263	43.40754	19.165771
gi|221232939|ref|NC_011916.1|	8201	8220	dnaK	+	44.066372	43.58257	20.484053
gi|221232939|ref|NC_011916.1|	8221	8240	dnaK	+	44.91988	44.80778	21.954443
gi|221232939|ref|NC_011916.1|	8241	8260	dnaK	+	45.931446	45.62459	23.272724
gi|221232939|ref|NC_011916.1|	8261	8280	dnaK	+	47.891357	47.60827	22.512177
gi|221232939|ref|NC_011916.1|	8281	8300	dnaK	+	48.99776	50.17538	22.714989
gi|221232939|ref|NC_011916.1|	8301	8320	dnaK	+	46.026283	46.14968	21.853037
gi|221232939|ref|NC_011916.1|	8321	8340	dnaK	+	47.67008	48.366734	22.309364
gi|221232939|ref|NC_011916.1|	8341	8360	dnaK	+	47.03785	49.475258	22.41077
gi|221232939|ref|NC_011916.1|	8361	8380	dnaK	+	50.009327	51.750656	25.554363
gi|221232939|ref|NC_011916.1|	8381	8400	dnaK	+	46.026283	47.899986	23.729052
gi|221232939|ref|NC_011916.1|	8401	8420	dnaK	+	45.646946	45.507904	24.489597
gi|221232939|ref|NC_011916.1|	8421	8440	dnaK	+	43.908314	40.256992	22.664286
gi|221232939|ref|NC_011916.1|	8441	8460	dnaK	+	41.316174	37.51485	21.39671
gi|221232939|ref|NC_011916.1|	8461	8480	dnaK	+	44.129593	38.915092	23.019207
gi|221232939|ref|NC_011916.1|	8481	8500	dnaK	+	42.643856	41.423862	22.360067
gi|221232939|ref|NC_011916.1|	8501	8520	dnaK	+	38.692425	36.931416	20.686865
gi|221232939|ref|NC_011916.1|	8521	8540	dnaK	+	39.988495	36.87307	23.37413
gi|221232939|ref|NC_011916.1|	8541	8560	dnaK	+	35.34161	32.088905	21.041786
gi|221232939|ref|NC_011916.1|	8561	8580	dnaK	+	36.953793	35.414486	21.193895
gi|221232939|ref|NC_011916.1|	8581	8600	dnaK	+	41.44262	40.665398	23.779755
gi|221232939|ref|NC_011916.1|	8601	8620	dnaK	+	45.710167	46.61643	25.554363
gi|221232939|ref|NC_011916.1|	8621	8640	dnaK	+	51.273785	47.95833	28.393736
gi|221232939|ref|NC_011916.1|	8641	8660	dnaK	+	53.58142	50.233723	29.509205
gi|221232939|ref|NC_011916.1|	8661	8680	dnaK	+	52.28535	51.575623	29.407799
gi|221232939|ref|NC_011916.1|	8681	8700	dnaK	+	49.345486	50.817158	29.91483
gi|221232939|ref|NC_011916.1|	8701	8720	dnaK	+	46.595287	49.591946	29.154284
gi|221232939|ref|NC_011916.1|	8721	8740	dnaK	+	44.572155	45.91631	28.241627
gi|221232939|ref|NC_011916.1|	8741	8760	dnaK	+	41.505844	40.54871	27.988111
gi|221232939|ref|NC_011916.1|	8761	8780	dnaK	+	43.97154	40.198647	30.26975
gi|221232939|ref|NC_011916.1|	8781	8800	dnaK	+	40.367832	34.597675	30.87819
gi|221232939|ref|NC_011916.1|	8801	8820	dnaK	+	38.850483	36.17295	32.804905
gi|221232939|ref|NC_011916.1|	8821	8840	dnaK	+	41.600677	39.615215	34.68092
gi|221232939|ref|NC_011916.1|	8841	8860	dnaK	+	41.22134	40.140305	33.15983
gi|221232939|ref|NC_011916.1|	8861	8880	dnaK	+	40.304607	40.665398	33.36264
gi|221232939|ref|NC_011916.1|	8881	8900	dnaK	+	38.060196	41.015457	31.283813
gi|221232939|ref|NC_011916.1|	8901	8920	dnaK	+	39.29304	39.03178	31.841547
gi|221232939|ref|NC_011916.1|	8921	8940	dnaK	+	37.775692	33.605835	30.87819
gi|221232939|ref|NC_011916.1|	8941	8960	dnaK	+	39.830437	31.97222	29.25569
gi|221232939|ref|NC_011916.1|	8961	8980	dnaK	+	35.12033	25.26272	23.678349
gi|221232939|ref|NC_011916.1|	8981	9000	dnaK	+	32.623024	26.42959	20.78827
gi|221232939|ref|NC_011916.1|	9001	9020	dnaK	+	32.212074	30.280258	20.737568
gi|221232939|ref|NC_011916.1|	9021	9040	dnaK	+	31.105675	31.622158	21.041786
gi|221232939|ref|NC_011916.1|	9041	9060	dnaK	+	32.781082	33.255775	22.867098
gi|221232939|ref|NC_011916.1|	9061	9080	dnaK	+	35.278385	34.247616	23.982567
gi|221232939|ref|NC_011916.1|	9081	9100	dnaK	+	35.626114	34.422646	24.083973
gi|221232939|ref|NC_011916.1|	9101	9120	dnaK	+	34.077152	34.889393	24.489597
gi|221232939|ref|NC_011916.1|	9121	9140	dnaK	+	31.485012	33.314117	23.627645
gi|221232939|ref|NC_011916.1|	9141	9160	dnaK	+	32.812695	33.547493	21.853037
gi|221232939|ref|NC_011916.1|	9161	9180	dnaK	+	35.278385	33.722523	22.157255
gi|221232939|ref|NC_011916.1|	9181	9200	dnaK	+	37.364742	33.430805	22.56288
gi|221232939|ref|NC_011916.1|	9201	9220	dnaK	+	38.344696	36.17295	23.627645
gi|221232939|ref|NC_011916.1|	9221	9240	dnaK	+	33.950706	32.905716	22.005146
gi|221232939|ref|NC_011916.1|	9241	9260	dnaK	+	33.85587	34.01424	22.664286
gi|221232939|ref|NC_011916.1|	9261	9280	dnaK	+	34.10876	34.247616	22.309364
gi|221232939|ref|NC_011916.1|	9281	9300	dnaK	+	31.959183	30.338602	18.912256
gi|221232939|ref|NC_011916.1|	9301	9320	dnaK	+	31.548235	28.471611	19.571398
gi|221232939|ref|NC_011916.1|	9321	9340	dnaK	+	26.743294	24.679287	15.768664
gi|221232939|ref|NC_011916.1|	9341	9360	dnaK	+	26.932962	25.554438	16.579914
gi|221232939|ref|NC_011916.1|	9361	9380	dnaK	+	25.921394	25.029346	16.782726
gi|221232939|ref|NC_011916.1|	9381	9400	dnaK	+	26.585236	24.154196	16.579914
gi|221232939|ref|NC_011916.1|	9401	9420	dnaK	+	29.809605	27.713146	16.985538
gi|221232939|ref|NC_011916.1|	9421	9440	dnaK	+	33.444923	29.930199	17.086945
gi|221232939|ref|NC_011916.1|	9441	9460	dnaK	+	37.017017	34.889393	19.6221
gi|221232939|ref|NC_011916.1|	9461	9480	dnaK	+	37.427967	36.056263	20.43335
gi|221232939|ref|NC_011916.1|	9481	9500	dnaK	+	34.04554	34.364304	19.520695
gi|221232939|ref|NC_011916.1|	9501	9520	dnaK	+	36.131897	38.565033	21.295301
gi|221232939|ref|NC_011916.1|	9521	9540	dnaK	+	36.321564	37.86491	20.078428
gi|221232939|ref|NC_011916.1|	9541	9560	dnaK	+	36.985405	37.456505	20.94038
gi|221232939|ref|NC_011916.1|	9561	9580	dnaK	+	36.00545	36.756382	21.193895
gi|221232939|ref|NC_011916.1|	9581	9600	dnaK	+	33.85587	32.43897	19.875616
gi|221232939|ref|NC_011916.1|	9601	9620	dnaK	+	31.86435	30.105228	18.202414
gi|221232939|ref|NC_011916.1|	9621	9640	dnaK	+	33.22364	27.94652	18.506632
gi|221232939|ref|NC_011916.1|	9641	9660	dnaK	+	31.579845	26.312902	18.405226
gi|221232939|ref|NC_011916.1|	9661	9680	dnaK	+	30.78956	26.312902	18.608038
gi|221232939|ref|NC_011916.1|	9681	9700	dnaK	+	30.757948	28.004864	19.824913
gi|221232939|ref|NC_011916.1|	9701	9720	dnaK	+	31.42179	27.829834	20.889677
gi|221232939|ref|NC_011916.1|	9721	9740	dnaK	+	32.08563	28.471611	20.129131
gi|221232939|ref|NC_011916.1|	9741	9760	dnaK	+	31.611458	27.421429	19.368584
gi|221232939|ref|NC_011916.1|	9761	9780	dnaK	+	32.52819	28.238237	18.455929
gi|221232939|ref|NC_011916.1|	9781	9800	dnaK	+	33.88748	29.930199	19.419287
gi|221232939|ref|NC_011916.1|	9801	9820	dnaK	+	33.982315	29.638481	20.636162
gi|221232939|ref|NC_011916.1|	9821	9840	dnaK	+	34.740993	29.405107	20.28124
gi|221232939|ref|NC_011916.1|	9841	9860	dnaK	+	31.832737	27.07137	19.824913
gi|221232939|ref|NC_011916.1|	9861	9880	dnaK	+	30.78956	27.304743	19.92632
gi|221232939|ref|NC_011916.1|	9881	9900	dnaK	+	32.243687	27.363085	21.143192
gi|221232939|ref|NC_011916.1|	9901	9920	dnaK	+	32.148853	27.246399	21.39671
gi|221232939|ref|NC_011916.1|	9921	9940	dnaK	+	37.5228	29.871855	23.982567
gi|221232939|ref|NC_011916.1|	9941	9960	dnaK	+	38.945316	31.097067	23.52624
gi|221232939|ref|NC_011916.1|	9961	9980	dnaK	+	42.580635	33.9559	25.047333
gi|221232939|ref|NC_011916.1|	9981	10000	dnaK	+	44.03476	35.7062	25.148739
gi|221232939|ref|NC_011916.1|	10001	10020	dnaK	+	44.097984	38.273315	27.075457
gi|221232939|ref|NC_011916.1|	10021	10040	dnaK	+	43.528976	40.840427	26.314909
gi|221232939|ref|NC_011916.1|	10041	10060	dnaK	+	45.836613	47.724957	28.596548
gi|221232939|ref|NC_011916.1|	10061	10080	null		49.62999	51.984028	28.190924
gi|221232939|ref|NC_011916.1|	10081	10100	null		58.16508	64.87794	32.145767
gi|221232939|ref|NC_011916.1|	10101	10120	null		61.768787	73.04602	32.652798
gi|221232939|ref|NC_011916.1|	10121	10140	null		65.46733	75.72982	35.441467
gi|221232939|ref|NC_011916.1|	10141	10160	null		65.9415	79.98889	35.13725
gi|221232939|ref|NC_011916.1|	10161	10180	null		64.36092	81.03908	36.45553
gi|221232939|ref|NC_011916.1|	10181	10200	null		68.66009	86.87342	37.368187
gi|221232939|ref|NC_011916.1|	10201	10220	null		65.30927	83.606186	35.28936
gi|221232939|ref|NC_011916.1|	10221	10240	dnaJ	+	65.562164	77.42178	35.390766
gi|221232939|ref|NC_011916.1|	10241	10260	dnaJ	+	61.13656	68.67026	30.523266
gi|221232939|ref|NC_011916.1|	10261	10280	dnaJ	+	58.73409	67.3867	31.689438
gi|221232939|ref|NC_011916.1|	10281	10300	dnaJ	+	56.489674	62.194134	30.928892
gi|221232939|ref|NC_011916.1|	10301	10320	dnaJ	+	53.423363	61.960762	29.306393
gi|221232939|ref|NC_011916.1|	10321	10340	dnaJ	+	51.17895	54.72617	28.799362
gi|221232939|ref|NC_011916.1|	10341	10360	dnaJ	+	46.46884	48.77514	25.959988
gi|221232939|ref|NC_011916.1|	10361	10380	dnaJ	+	44.47732	48.541763	25.858582
gi|221232939|ref|NC_011916.1|	10381	10400	dnaJ	+	39.67238	39.090122	22.461473
gi|221232939|ref|NC_011916.1|	10401	10420	dnaJ	+	41.85357	40.315334	23.678349
gi|221232939|ref|NC_011916.1|	10421	10440	dnaJ	+	38.724037	37.281475	23.982567
gi|221232939|ref|NC_011916.1|	10441	10460	dnaJ	+	37.238297	36.756382	24.489597
gi|221232939|ref|NC_011916.1|	10461	10480	dnaJ	+	35.847393	39.03178	25.148739
gi|221232939|ref|NC_011916.1|	10481	10500	dnaJ	+	33.919094	37.68988	23.019207
gi|221232939|ref|NC_011916.1|	10501	10520	dnaJ	+	32.33852	35.00608	20.331944
gi|221232939|ref|NC_011916.1|	10521	10540	dnaJ	+	32.97075	32.905716	18.912256
gi|221232939|ref|NC_011916.1|	10541	10560	dnaJ	+	31.959183	30.221916	17.948898
gi|221232939|ref|NC_011916.1|	10561	10580	dnaJ	+	29.651546	27.129711	16.985538
gi|221232939|ref|NC_011916.1|	10581	10600	dnaJ	+	29.746382	28.063208	18.760147
gi|221232939|ref|NC_011916.1|	10601	10620	dnaJ	+	26.363956	28.354925	17.391163
gi|221232939|ref|NC_011916.1|	10621	10640	dnaJ	+	26.964573	25.612782	18.253117
gi|221232939|ref|NC_011916.1|	10641	10660	dnaJ	+	27.249077	26.137873	16.934835
gi|221232939|ref|NC_011916.1|	10661	10680	dnaJ	+	28.798038	27.479773	18.253117
gi|221232939|ref|NC_011916.1|	10681	10700	dnaJ	+	27.059408	26.42959	17.441866
gi|221232939|ref|NC_011916.1|	10701	10720	dnaJ	+	26.964573	25.846155	17.289757
gi|221232939|ref|NC_011916.1|	10721	10740	dnaJ	+	26.774904	24.971004	17.18835
gi|221232939|ref|NC_011916.1|	10741	10760	dnaJ	+	27.691637	25.379408	17.137648
gi|221232939|ref|NC_011916.1|	10761	10780	dnaJ	+	26.86974	24.679287	16.478508
gi|221232939|ref|NC_011916.1|	10781	10800	dnaJ	+	26.079453	24.154196	16.68132
gi|221232939|ref|NC_011916.1|	10801	10820	dnaJ	+	25.194332	22.870638	15.21093
gi|221232939|ref|NC_011916.1|	10821	10840	dnaJ	+	20.895174	19.253344	11.611011
gi|221232939|ref|NC_011916.1|	10841	10860	dnaJ	+	18.208199	17.152979	10.039214
gi|221232939|ref|NC_011916.1|	10861	10880	dnaJ	+	15.900563	15.285988	8.974449
gi|221232939|ref|NC_011916.1|	10881	10900	dnaJ	+	12.929086	10.910228	7.453356
gi|221232939|ref|NC_011916.1|	10901	10920	dnaJ	+	11.91752	9.451641	6.2871847
gi|221232939|ref|NC_011916.1|	10921	10940	dnaJ	+	11.000787	8.634833	6.591403
gi|221232939|ref|NC_011916.1|	10941	10960	dnaJ	+	9.54666	7.176246	5.475935
gi|221232939|ref|NC_011916.1|	10961	10980	dnaJ	+	15.331557	12.95225	9.684292
gi|221232939|ref|NC_011916.1|	10981	11000	dnaJ	+	17.639193	15.402675	10.394135
gi|221232939|ref|NC_011916.1|	11001	11020	dnaJ	+	21.527403	19.136658	12.371556
gi|221232939|ref|NC_011916.1|	11021	11040	dnaJ	+	23.582148	21.178679	14.754602
gi|221232939|ref|NC_011916.1|	11041	11060	dnaJ	+	24.878218	22.870638	15.515149
gi|221232939|ref|NC_011916.1|	11061	11080	dnaJ	+	26.585236	25.321064	17.289757
gi|221232939|ref|NC_011916.1|	11081	11100	dnaJ	+	24.119541	24.737629	17.695383
gi|221232939|ref|NC_011916.1|	11101	11120	dnaJ	+	21.49579	23.337387	16.275696
gi|221232939|ref|NC_011916.1|	11121	11140	dnaJ	+	26.585236	25.496096	19.875616
gi|221232939|ref|NC_011916.1|	11141	11160	dnaJ	+	25.13111	24.154196	18.506632
gi|221232939|ref|NC_011916.1|	11161	11180	dnaJ	+	27.280687	24.737629	19.6221
gi|221232939|ref|NC_011916.1|	11181	11200	dnaJ	+	27.944529	25.437752	20.129131
gi|221232939|ref|NC_011916.1|	11201	11220	dnaJ	+	25.668503	21.820456	18.760147
gi|221232939|ref|NC_011916.1|	11221	11240	dnaJ	+	28.481924	24.38757	19.92632
gi|221232939|ref|NC_011916.1|	11241	11260	dnaJ	+	27.660025	21.237022	16.884132
gi|221232939|ref|NC_011916.1|	11261	11280	dnaJ	+	28.829649	24.037508	18.760147
gi|221232939|ref|NC_011916.1|	11281	11300	dnaJ	+	25.036274	22.578922	17.086945
gi|221232939|ref|NC_011916.1|	11301	11320	dnaJ	+	26.648458	25.72947	18.861553
gi|221232939|ref|NC_011916.1|	11321	11340	dnaJ	+	24.340822	24.212538	16.934835
gi|221232939|ref|NC_011916.1|	11341	11360	dnaJ	+	25.668503	23.454073	17.18835
gi|221232939|ref|NC_011916.1|	11361	11380	dnaJ	+	26.42718	21.70377	17.239054
gi|221232939|ref|NC_011916.1|	11381	11400	null		28.734816	23.2207	18.760147
gi|221232939|ref|NC_011916.1|	11401	11420	null		36.47962	31.272099	24.03327
gi|221232939|ref|NC_011916.1|	11421	11440	null		37.712467	35.064423	24.134676
gi|221232939|ref|NC_011916.1|	11441	11460	null		44.22443	42.4157	28.596548
gi|221232939|ref|NC_011916.1|	11461	11480	mutS	+	45.96306	43.699257	28.495142
gi|221232939|ref|NC_011916.1|	11481	11500	mutS	+	51.526676	51.050533	31.74014
gi|221232939|ref|NC_011916.1|	11501	11520	mutS	+	53.454975	54.37611	33.413345
gi|221232939|ref|NC_011916.1|	11521	11540	mutS	+	50.198994	53.092556	32.19647
gi|221232939|ref|NC_011916.1|	11541	11560	mutS	+	47.132683	49.475258	32.39928
gi|221232939|ref|NC_011916.1|	11561	11580	mutS	+	41.22134	39.265152	27.683893
gi|221232939|ref|NC_011916.1|	11581	11600	mutS	+	37.74408	32.380623	25.300848
gi|221232939|ref|NC_011916.1|	11601	11620	mutS	+	31.516623	25.146034	21.700928
gi|221232939|ref|NC_011916.1|	11621	11640	mutS	+	28.60837	24.620943	20.534756
gi|221232939|ref|NC_011916.1|	11641	11660	mutS	+	26.996185	23.629105	19.419287
gi|221232939|ref|NC_011916.1|	11661	11680	mutS	+	25.794949	22.053831	18.101007
gi|221232939|ref|NC_011916.1|	11681	11700	mutS	+	25.13111	20.711931	17.847492
gi|221232939|ref|NC_011916.1|	11701	11720	mutS	+	23.360867	17.386353	16.782726
gi|221232939|ref|NC_011916.1|	11721	11740	mutS	+	23.708593	16.627888	17.948898
gi|221232939|ref|NC_011916.1|	11741	11760	mutS	+	19.09332	13.418997	13.487025
gi|221232939|ref|NC_011916.1|	11761	11780	mutS	+	16.817295	11.552007	11.4589
gi|221232939|ref|NC_011916.1|	11781	11800	mutS	+	15.2051115	10.26845	10.292729
gi|221232939|ref|NC_011916.1|	11801	11820	mutS	+	14.54127	9.976733	8.873043
gi|221232939|ref|NC_011916.1|	11821	11840	mutS	+	14.256767	10.035076	9.278667
gi|221232939|ref|NC_011916.1|	11841	11860	mutS	+	12.707806	9.043238	8.213902
gi|221232939|ref|NC_011916.1|	11861	11880	mutS	+	12.707806	9.685016	8.416715
gi|221232939|ref|NC_011916.1|	11881	11900	mutS	+	10.905952	8.459803	7.7068715
gi|221232939|ref|NC_011916.1|	11901	11920	mutS	+	9.831163	8.92655	6.591403
gi|221232939|ref|NC_011916.1|	11921	11940	mutS	+	9.420215	7.2929335	6.033669
gi|221232939|ref|NC_011916.1|	11941	11960	mutS	+	8.503482	6.3010945	6.033669
gi|221232939|ref|NC_011916.1|	11961	11980	mutS	+	7.997699	5.9510336	5.830857
gi|221232939|ref|NC_011916.1|	11981	12000	mutS	+	8.629928	6.359438	7.6561685
gi|221232939|ref|NC_011916.1|	12001	12020	mutS	+	10.684672	8.051398	8.619527
gi|221232939|ref|NC_011916.1|	12021	12040	mutS	+	12.486526	9.101581	9.734995
gi|221232939|ref|NC_011916.1|	12041	12060	mutS	+	13.0555315	9.568329	9.684292
gi|221232939|ref|NC_011916.1|	12061	12080	mutS	+	13.909041	10.501824	9.785699
gi|221232939|ref|NC_011916.1|	12081	12100	mutS	+	14.509659	9.918389	10.901167
gi|221232939|ref|NC_011916.1|	12101	12120	mutS	+	15.110276	11.960411	12.675776
gi|221232939|ref|NC_011916.1|	12121	12140	mutS	+	14.76255	12.660532	11.5096035
gi|221232939|ref|NC_011916.1|	12141	12160	mutS	+	13.21359	11.902067	9.887105
gi|221232939|ref|NC_011916.1|	12161	12180	mutS	+	13.0555315	11.0852585	9.785699
gi|221232939|ref|NC_011916.1|	12181	12200	mutS	+	12.454914	11.435319	10.292729
gi|221232939|ref|NC_011916.1|	12201	12220	mutS	+	11.822685	10.851885	11.154682
gi|221232939|ref|NC_011916.1|	12221	12240	mutS	+	10.273724	8.75152	8.923746
gi|221232939|ref|NC_011916.1|	12241	12260	mutS	+	8.851208	7.759681	6.692809
gi|221232939|ref|NC_011916.1|	12261	12280	mutS	+	6.7964635	4.7258205	4.106951
gi|221232939|ref|NC_011916.1|	12281	12300	mutS	+	6.353903	4.4341035	3.8534358
gi|221232939|ref|NC_011916.1|	12301	12320	mutS	+	7.2074122	4.9008512	4.968904
gi|221232939|ref|NC_011916.1|	12321	12340	mutS	+	8.187367	5.834347	5.374529
gi|221232939|ref|NC_011916.1|	12341	12360	mutS	+	9.262157	7.23459	6.7435126
gi|221232939|ref|NC_011916.1|	12361	12380	mutS	+	10.273724	8.109742	7.1998405
gi|221232939|ref|NC_011916.1|	12381	12400	mutS	+	12.454914	9.685016	9.582886
gi|221232939|ref|NC_011916.1|	12401	12420	mutS	+	12.80264	10.735198	10.14062
gi|221232939|ref|NC_011916.1|	12421	12440	mutS	+	13.21359	11.61035	9.887105
gi|221232939|ref|NC_011916.1|	12441	12460	mutS	+	13.529704	11.727036	9.887105
gi|221232939|ref|NC_011916.1|	12461	12480	mutS	+	13.150366	10.560167	8.163199
gi|221232939|ref|NC_011916.1|	12481	12500	mutS	+	13.466481	10.4434805	8.82234
gi|221232939|ref|NC_011916.1|	12501	12520	mutS	+	14.003876	10.735198	8.873043
gi|221232939|ref|NC_011916.1|	12521	12540	mutS	+	12.897474	11.318632	9.025152
gi|221232939|ref|NC_011916.1|	12541	12560	mutS	+	14.920608	12.135441	10.039214
gi|221232939|ref|NC_011916.1|	12561	12580	mutS	+	14.003876	12.602189	10.089917
gi|221232939|ref|NC_011916.1|	12581	12600	mutS	+	13.21359	11.435319	9.3293705
gi|221232939|ref|NC_011916.1|	12601	12620	mutS	+	12.612971	10.385137	8.315309
gi|221232939|ref|NC_011916.1|	12621	12640	mutS	+	12.107188	10.4434805	7.504059
gi|221232939|ref|NC_011916.1|	12641	12660	mutS	+	12.58136	10.26845	6.895622
gi|221232939|ref|NC_011916.1|	12661	12680	mutS	+	12.897474	10.151763	8.2646055
gi|221232939|ref|NC_011916.1|	12681	12700	mutS	+	12.454914	9.626672	9.025152
gi|221232939|ref|NC_011916.1|	12701	12720	mutS	+	12.676194	9.393298	9.126558
gi|221232939|ref|NC_011916.1|	12721	12740	mutS	+	13.087143	9.685016	8.366012
gi|221232939|ref|NC_011916.1|	12741	12760	mutS	+	12.897474	10.501824	9.278667
gi|221232939|ref|NC_011916.1|	12761	12780	mutS	+	15.110276	11.376976	10.444839
gi|221232939|ref|NC_011916.1|	12781	12800	mutS	+	16.05862	12.718876	11.661714
gi|221232939|ref|NC_011916.1|	12801	12820	mutS	+	18.39787	14.294149	12.574369
gi|221232939|ref|NC_011916.1|	12821	12840	mutS	+	17.291468	15.052614	11.205385
gi|221232939|ref|NC_011916.1|	12841	12860	mutS	+	17.006964	14.64421	11.4589
gi|221232939|ref|NC_011916.1|	12861	12880	mutS	+	15.4896145	13.010593	11.813823
gi|221232939|ref|NC_011916.1|	12881	12900	mutS	+	15.584449	12.427158	12.118041
gi|221232939|ref|NC_011916.1|	12901	12920	mutS	+	16.596016	12.777219	12.878588
gi|221232939|ref|NC_011916.1|	12921	12940	mutS	+	17.702415	12.95225	13.436321
gi|221232939|ref|NC_011916.1|	12941	12960	mutS	+	17.98692	14.119119	14.602493
gi|221232939|ref|NC_011916.1|	12961	12980	mutS	+	16.343124	13.185623	13.841947
gi|221232939|ref|NC_011916.1|	12981	13000	mutS	+	13.972264	12.135441	13.334915
gi|221232939|ref|NC_011916.1|	13001	13020	mutS	+	15.963786	13.5940275	14.196868
gi|221232939|ref|NC_011916.1|	13021	13040	mutS	+	16.785685	14.410836	13.537728
gi|221232939|ref|NC_011916.1|	13041	13060	mutS	+	17.54436	14.702554	14.906712
gi|221232939|ref|NC_011916.1|	13061	13080	mutS	+	16.185066	14.177463	13.182806
gi|221232939|ref|NC_011916.1|	13081	13100	mutS	+	18.966875	15.869423	14.146165
gi|221232939|ref|NC_011916.1|	13101	13120	mutS	+	18.84043	16.219484	15.717961
gi|221232939|ref|NC_011916.1|	13121	13140	mutS	+	18.144976	14.64421	13.334915
gi|221232939|ref|NC_011916.1|	13141	13160	mutS	+	17.259855	13.769058	12.016635
gi|221232939|ref|NC_011916.1|	13161	13180	mutS	+	15.963786	12.193785	11.002573
gi|221232939|ref|NC_011916.1|	13181	13200	mutS	+	17.038576	12.893906	11.408197
gi|221232939|ref|NC_011916.1|	13201	13220	mutS	+	15.742506	11.668694	11.357494
gi|221232939|ref|NC_011916.1|	13221	13240	mutS	+	14.730939	11.61035	11.611011
gi|221232939|ref|NC_011916.1|	13241	13260	mutS	+	15.2051115	12.602189	11.560307
gi|221232939|ref|NC_011916.1|	13261	13280	mutS	+	13.02392	10.793541	10.039214
gi|221232939|ref|NC_011916.1|	13281	13300	mutS	+	14.952219	11.435319	10.191323
gi|221232939|ref|NC_011916.1|	13301	13320	mutS	+	14.857385	9.860045	9.025152
gi|221232939|ref|NC_011916.1|	13321	13340	mutS	+	14.794162	9.743359	8.873043
gi|221232939|ref|NC_011916.1|	13341	13360	mutS	+	14.478047	9.860045	9.380074
gi|221232939|ref|NC_011916.1|	13361	13380	mutS	+	14.667716	9.393298	10.546245
gi|221232939|ref|NC_011916.1|	13381	13400	mutS	+	16.185066	10.560167	12.472962
gi|221232939|ref|NC_011916.1|	13401	13420	mutS	+	17.639193	11.668694	12.219447
gi|221232939|ref|NC_011916.1|	13421	13440	mutS	+	17.101799	11.260289	11.965932
gi|221232939|ref|NC_011916.1|	13441	13460	mutS	+	17.323078	12.660532	12.777182
gi|221232939|ref|NC_011916.1|	13461	13480	mutS	+	16.94374	12.777219	12.320853
gi|221232939|ref|NC_011916.1|	13481	13500	mutS	+	17.35469	14.119119	13.7405405
gi|221232939|ref|NC_011916.1|	13501	13520	mutS	+	16.722462	13.827401	13.132103
gi|221232939|ref|NC_011916.1|	13521	13540	mutS	+	16.343124	13.185623	12.422259
gi|221232939|ref|NC_011916.1|	13541	13560	mutS	+	17.228245	14.935927	13.233509
gi|221232939|ref|NC_011916.1|	13561	13580	mutS	+	17.101799	14.352492	12.777182
gi|221232939|ref|NC_011916.1|	13581	13600	mutS	+	16.69085	13.652371	12.675776
gi|221232939|ref|NC_011916.1|	13601	13620	mutS	+	17.670805	14.64421	14.906712
gi|221232939|ref|NC_011916.1|	13621	13640	mutS	+	16.50118	13.535685	13.639134
gi|221232939|ref|NC_011916.1|	13641	13660	mutS	+	17.79725	13.885745	14.55179
gi|221232939|ref|NC_011916.1|	13661	13680	mutS	+	17.291468	12.777219	13.689837
gi|221232939|ref|NC_011916.1|	13681	13700	mutS	+	17.79725	13.769058	14.8053055
gi|221232939|ref|NC_011916.1|	13701	13720	mutS	+	17.860474	13.652371	15.87007
gi|221232939|ref|NC_011916.1|	13721	13740	mutS	+	18.461092	14.702554	17.492569
gi|221232939|ref|NC_011916.1|	13741	13760	mutS	+	19.915218	15.927766	19.419287
gi|221232939|ref|NC_011916.1|	13761	13780	mutS	+	18.587538	14.119119	17.593975
gi|221232939|ref|NC_011916.1|	13781	13800	mutS	+	17.98692	13.5940275	16.377102
gi|221232939|ref|NC_011916.1|	13801	13820	mutS	+	16.216679	11.727036	13.030697
gi|221232939|ref|NC_011916.1|	13821	13840	mutS	+	14.509659	10.676854	10.850464
gi|221232939|ref|NC_011916.1|	13841	13860	mutS	+	15.047053	11.318632	10.799761
gi|221232939|ref|NC_011916.1|	13861	13880	mutS	+	17.006964	12.485502	12.118041
gi|221232939|ref|NC_011916.1|	13881	13900	mutS	+	17.35469	13.885745	13.233509
gi|221232939|ref|NC_011916.1|	13901	13920	mutS	+	18.555925	15.869423	13.284212
gi|221232939|ref|NC_011916.1|	13921	13940	mutS	+	18.01853	15.052614	13.537728
gi|221232939|ref|NC_011916.1|	13941	13960	mutS	+	19.409435	15.169301	13.841947
gi|221232939|ref|NC_011916.1|	13961	13980	mutS	+	19.72555	14.294149	13.89265
gi|221232939|ref|NC_011916.1|	13981	14000	mutS	+	17.892084	12.252128	12.168744
gi|221232939|ref|NC_011916.1|	14001	14020	mutS	+	17.98692	13.477341	11.864526
gi|221232939|ref|NC_011916.1|	14021	14040	mutS	+	18.303034	13.710714	12.168744
gi|221232939|ref|NC_011916.1|	14041	14060	mutS	+	17.765638	14.702554	12.27015
gi|221232939|ref|NC_011916.1|	14061	14080	mutS	+	19.883606	18.028131	14.196868
gi|221232939|ref|NC_011916.1|	14081	14100	mutS	+	21.780294	21.762114	16.275696
gi|221232939|ref|NC_011916.1|	14101	14120	mutS	+	25.036274	24.91266	18.96296
gi|221232939|ref|NC_011916.1|	14121	14140	mutS	+	25.763338	26.779652	19.31788
gi|221232939|ref|NC_011916.1|	14141	14160	mutS	+	31.263731	34.364304	23.06991
gi|221232939|ref|NC_011916.1|	14161	14180	mutS	+	31.105675	37.339817	24.793816
gi|221232939|ref|NC_011916.1|	14181	14200	CC_0013	+	39.356266	51.809	28.900768
gi|221232939|ref|NC_011916.1|	14201	14220	CC_0013	+	43.40253	57.585003	33.464046
gi|221232939|ref|NC_011916.1|	14221	14240	CC_0013	+	47.164295	58.285122	32.804905
gi|221232939|ref|NC_011916.1|	14241	14260	CC_0013	+	51.115726	61.26064	34.123188
gi|221232939|ref|NC_011916.1|	14261	14280	CC_0013	+	46.974625	55.601322	31.537329
gi|221232939|ref|NC_011916.1|	14281	14300	CC_0013	+	43.81348	55.076233	30.87819
gi|221232939|ref|NC_011916.1|	14301	14320	CC_0013	+	34.330044	41.94895	25.858582
gi|221232939|ref|NC_011916.1|	14321	14340	CC_0013	+	36.63768	42.999134	28.74866
gi|221232939|ref|NC_011916.1|	14341	14360	CC_0013	+	32.844303	36.87307	25.605066
gi|221232939|ref|NC_011916.1|	14361	14380	CC_0013	+	31.959183	32.78903	24.5403
gi|221232939|ref|NC_011916.1|	14381	14400	CC_0013	+	27.470356	26.779652	20.28124
gi|221232939|ref|NC_011916.1|	14401	14420	CC_0013	+	25.415611	23.979164	18.354523
gi|221232939|ref|NC_011916.1|	14421	14440	CC_0013	+	23.613758	20.18684	16.377102
gi|221232939|ref|NC_011916.1|	14441	14460	CC_0013	+	25.289165	22.812296	17.18835
gi|221232939|ref|NC_011916.1|	14461	14480	CC_0013	+	26.964573	24.154196	19.216475
gi|221232939|ref|NC_011916.1|	14481	14500	CC_0013	+	29.461878	26.021187	21.853037
gi|221232939|ref|NC_011916.1|	14501	14520	CC_0013	+	31.326954	27.713146	24.03327
gi|221232939|ref|NC_011916.1|	14521	14540	CC_0013	+	31.358566	26.837994	23.222021
gi|221232939|ref|NC_011916.1|	14541	14560	CC_0013	+	31.737904	26.954681	21.244598
gi|221232939|ref|NC_011916.1|	14561	14580	CC_0013	+	33.318478	29.11339	22.714989
gi|221232939|ref|NC_011916.1|	14581	14600	CC_0013	+	29.114153	27.829834	21.143192
gi|221232939|ref|NC_011916.1|	14601	14620	CC_0013	+	26.648458	24.854317	20.179834
gi|221232939|ref|NC_011916.1|	14621	14640	CC_0013	+	26.111063	20.36187	18.15171
gi|221232939|ref|NC_011916.1|	14641	14660	CC_0013	+	25.036274	20.128496	17.746086
gi|221232939|ref|NC_011916.1|	14661	14680	CC_0013	+	25.067886	19.370031	16.985538
gi|221232939|ref|NC_011916.1|	14681	14700	CC_0013	+	26.205898	21.995487	17.441866
gi|221232939|ref|NC_011916.1|	14701	14720	CC_0013	+	26.300732	22.578922	16.985538
gi|221232939|ref|NC_011916.1|	14721	14740	CC_0013	+	27.660025	21.995487	17.847492
gi|221232939|ref|NC_011916.1|	14741	14760	CC_0013	+	28.829649	21.295364	18.354523
gi|221232939|ref|NC_011916.1|	14761	14780	CC_0013	+	28.355478	20.770273	17.391163
gi|221232939|ref|NC_011916.1|	14781	14800	CC_0013	+	27.280687	22.112173	18.81085
gi|221232939|ref|NC_011916.1|	14801	14820	CC_0013	+	24.72016	23.687447	17.036242
gi|221232939|ref|NC_011916.1|	14821	14840	CC_0013	+	23.898262	23.162355	18.861553
gi|221232939|ref|NC_011916.1|	14841	14860	CC_0013	+	26.079453	24.971004	21.548819
gi|221232939|ref|NC_011916.1|	14861	14880	CC_0013	+	24.625326	24.737629	24.083973
gi|221232939|ref|NC_011916.1|	14881	14900	CC_0013	+	24.878218	24.620943	24.895222
gi|221232939|ref|NC_011916.1|	14901	14920	CC_0013	+	22.79186	22.053831	22.005146
gi|221232939|ref|NC_011916.1|	14921	14940	CC_0013	+	19.030098	16.686232	16.68132
gi|221232939|ref|NC_011916.1|	14941	14960	CC_0013	+	20.515837	16.511202	18.96296
gi|221232939|ref|NC_011916.1|	14961	14980	CC_0013	+	17.765638	14.702554	15.768664
gi|221232939|ref|NC_011916.1|	14981	15000	CC_0013	+	17.670805	14.177463	15.160227
gi|221232939|ref|NC_011916.1|	15001	15020	CC_0013	+	18.84043	15.869423	14.653196
gi|221232939|ref|NC_011916.1|	15021	15040	CC_0013	+	20.57906	14.8775835	16.377102
gi|221232939|ref|NC_011916.1|	15041	15060	CC_0013	+	23.076365	15.869423	19.46999
gi|221232939|ref|NC_011916.1|	15061	15080	CC_0013	+	22.918306	15.752736	19.723507
gi|221232939|ref|NC_011916.1|	15081	15100	CC_0013	+	22.855083	17.8531	19.6221
gi|221232939|ref|NC_011916.1|	15101	15120	CC_0013	+	23.993095	20.011808	19.723507
gi|221232939|ref|NC_011916.1|	15121	15140	CC_0013	+	24.182764	20.011808	17.898195
gi|221232939|ref|NC_011916.1|	15141	15160	CC_0013	+	22.697027	20.420214	17.746086
gi|221232939|ref|NC_011916.1|	15161	15180	CC_0013	+	20.958397	20.711931	15.9207735
gi|221232939|ref|NC_011916.1|	15181	15200	CC_0013	+	20.768728	21.470396	16.529211
gi|221232939|ref|NC_011916.1|	15201	15220	CC_0013	+	21.05323	19.195	17.137648
gi|221232939|ref|NC_011916.1|	15221	15240	CC_0013	+	22.380913	18.611567	17.036242
gi|221232939|ref|NC_011916.1|	15241	15260	CC_0013	+	24.53049	18.261505	18.912256
gi|221232939|ref|NC_011916.1|	15261	15280	CC_0013	+	25.036274	17.619726	18.96296
gi|221232939|ref|NC_011916.1|	15281	15300	CC_0013	+	26.45879	18.261505	20.078428
gi|221232939|ref|NC_011916.1|	15301	15320	CC_0013	+	24.182764	16.802917	19.31788
gi|221232939|ref|NC_011916.1|	15321	15340	CC_0013	+	25.099497	18.669909	20.078428
gi|221232939|ref|NC_011916.1|	15341	15360	CC_0013	+	22.886696	17.152979	18.30382
gi|221232939|ref|NC_011916.1|	15361	15380	CC_0013	+	20.673893	15.98611	14.754602
gi|221232939|ref|NC_011916.1|	15381	15400	CC_0013	+	20.958397	15.752736	14.754602
gi|221232939|ref|NC_011916.1|	15401	15420	CC_0013	+	20.262945	15.927766	13.994056
gi|221232939|ref|NC_011916.1|	15421	15440	CC_0013	+	21.02162	15.344332	15.667258
gi|221232939|ref|NC_011916.1|	15441	15460	CC_0013	+	22.191242	16.686232	15.9207735
gi|221232939|ref|NC_011916.1|	15461	15480	CC_0013	+	21.116453	15.344332	16.123587
gi|221232939|ref|NC_011916.1|	15481	15500	CC_0013	+	22.728638	16.744576	14.8053055
gi|221232939|ref|NC_011916.1|	15501	15520	CC_0013	+	23.898262	18.903282	16.934835
gi|221232939|ref|NC_011916.1|	15521	15540	CC_0013	+	22.886696	18.494879	16.782726
gi|221232939|ref|NC_011916.1|	15541	15560	CC_0013	+	23.961485	19.661749	18.96296
gi|221232939|ref|NC_011916.1|	15561	15580	CC_0013	+	21.68546	17.619726	17.543272
gi|221232939|ref|NC_011916.1|	15581	15600	CC_0013	+	21.02162	18.086475	17.391163
gi|221232939|ref|NC_011916.1|	15601	15620	CC_0013	+	19.915218	17.152979	16.68132
gi|221232939|ref|NC_011916.1|	15621	15640	CC_0013	+	19.915218	17.561384	17.593975
gi|221232939|ref|NC_011916.1|	15641	15660	CC_0013	+	17.828861	14.8775835	16.17429
gi|221232939|ref|NC_011916.1|	15661	15680	CC_0013	+	19.030098	16.277826	17.64468
gi|221232939|ref|NC_011916.1|	15681	15700	CC_0013	+	18.461092	15.344332	17.34046
gi|221232939|ref|NC_011916.1|	15701	15720	CC_0013	+	19.030098	15.98611	16.123587
gi|221232939|ref|NC_011916.1|	15721	15740	CC_0013	+	19.441046	16.16114	15.667258
gi|221232939|ref|NC_011916.1|	15741	15760	CC_0013	+	18.619148	16.627888	14.906712
gi|221232939|ref|NC_011916.1|	15761	15780	CC_0013	+	17.79725	14.46918	14.55179
gi|221232939|ref|NC_011916.1|	15781	15800	CC_0013	+	16.50118	14.410836	14.247571
gi|221232939|ref|NC_011916.1|	15801	15820	CC_0013	+	16.848907	15.869423	15.160227
gi|221232939|ref|NC_011916.1|	15821	15840	CC_0013	+	17.417913	15.98611	15.768664
gi|221232939|ref|NC_011916.1|	15841	15860	CC_0013	+	18.619148	17.794758	16.68132
gi|221232939|ref|NC_011916.1|	15861	15880	CC_0013	+	18.176588	17.8531	17.34046
gi|221232939|ref|NC_011916.1|	15881	15900	CC_0013	+	20.041664	17.386353	16.934835
gi|221232939|ref|NC_011916.1|	15901	15920	CC_0013	+	19.504269	16.686232	15.87007
gi|221232939|ref|NC_011916.1|	15921	15940	CC_0013	+	17.449524	13.535685	13.233509
gi|221232939|ref|NC_011916.1|	15941	15960	CC_0013	+	17.702415	12.427158	13.030697
gi|221232939|ref|NC_011916.1|	15961	15980	CC_0013	+	16.848907	11.727036	13.537728
gi|221232939|ref|NC_011916.1|	15981	16000	CC_0013	+	17.670805	11.960411	13.89265
gi|221232939|ref|NC_011916.1|	16001	16020	CC_0013	+	18.619148	11.668694	15.413743
gi|221232939|ref|NC_011916.1|	16021	16040	CC_0013	+	18.01853	11.260289	14.247571
gi|221232939|ref|NC_011916.1|	16041	16060	CC_0013	+	18.303034	12.193785	13.588431
gi|221232939|ref|NC_011916.1|	16061	16080	CC_0013	+	15.932175	12.543845	12.371556
gi|221232939|ref|NC_011916.1|	16081	16100	CC_0013	+	16.564404	12.135441	13.7405405
gi|221232939|ref|NC_011916.1|	16101	16120	CC_0013	+	15.963786	12.368814	13.89265
gi|221232939|ref|NC_011916.1|	16121	16140	CC_0013	+	15.710895	11.376976	13.132103
gi|221232939|ref|NC_011916.1|	16141	16160	CC_0013	+	15.584449	11.843723	12.726479
gi|221232939|ref|NC_011916.1|	16161	16180	CC_0013	+	15.426392	11.0852585	11.611011
gi|221232939|ref|NC_011916.1|	16181	16200	CC_0013	+	16.69085	14.294149	12.878588
gi|221232939|ref|NC_011916.1|	16201	16220	CC_0013	+	17.639193	13.769058	13.284212
gi|221232939|ref|NC_011916.1|	16221	16240	CC_0013	+	17.449524	15.110958	13.487025
gi|221232939|ref|NC_011916.1|	16241	16260	CC_0013	+	17.607582	14.760897	13.233509
gi|221232939|ref|NC_011916.1|	16261	16280	CC_0013	+	16.185066	15.169301	12.27015
gi|221232939|ref|NC_011916.1|	16281	16300	CC_0013	+	17.512747	16.744576	14.146165
gi|221232939|ref|NC_011916.1|	16301	16320	CC_0013	+	17.79725	16.919605	13.89265
gi|221232939|ref|NC_011916.1|	16321	16340	CC_0013	+	19.820383	17.094635	15.160227
gi|221232939|ref|NC_011916.1|	16341	16360	CC_0013	+	19.409435	16.686232	14.8053055
gi|221232939|ref|NC_011916.1|	16361	16380	CC_0013	+	19.061708	15.169301	14.399681
gi|221232939|ref|NC_011916.1|	16381	16400	CC_0013	+	18.303034	15.519362	14.906712
gi|221232939|ref|NC_011916.1|	16401	16420	CC_0013	+	18.619148	15.461019	14.754602
gi|221232939|ref|NC_011916.1|	16421	16440	CC_0013	+	19.535881	15.927766	15.565852
gi|221232939|ref|NC_011916.1|	16441	16460	CC_0013	+	19.978441	16.452858	16.275696
gi|221232939|ref|NC_011916.1|	16461	16480	CC_0013	+	18.935263	14.585867	14.703899
gi|221232939|ref|NC_011916.1|	16481	16500	CC_0013	+	18.713984	15.169301	13.89265
gi|221232939|ref|NC_011916.1|	16501	16520	CC_0013	+	16.437958	13.12728	12.827885
gi|221232939|ref|NC_011916.1|	16521	16540	CC_0013	+	15.679283	13.652371	11.864526
gi|221232939|ref|NC_011916.1|	16541	16560	CC_0013	+	13.118754	10.910228	10.799761
gi|221232939|ref|NC_011916.1|	16561	16580	CC_0013	+	12.676194	11.201945	10.596948
gi|221232939|ref|NC_011916.1|	16581	16600	CC_0013	+	12.36008	11.026916	10.343432
gi|221232939|ref|NC_011916.1|	16601	16620	CC_0013	+	12.929086	10.618511	10.191323
gi|221232939|ref|NC_011916.1|	16621	16640	CC_0013	+	13.43487	10.793541	10.039214
gi|221232939|ref|NC_011916.1|	16641	16660	CC_0013	+	12.486526	9.1599245	9.582886
gi|221232939|ref|NC_011916.1|	16661	16680	CC_0013	+	12.676194	10.326794	11.611011
gi|221232939|ref|NC_011916.1|	16681	16700	CC_0013	+	13.150366	10.793541	12.675776
gi|221232939|ref|NC_011916.1|	16701	16720	CC_0013	+	15.015442	11.727036	13.537728
gi|221232939|ref|NC_011916.1|	16721	16740	CC_0013	+	16.46957	12.368814	13.132103
gi|221232939|ref|NC_011916.1|	16741	16760	CC_0013	+	17.54436	13.243967	13.284212
gi|221232939|ref|NC_011916.1|	16761	16780	CC_0013	+	18.113365	14.46918	13.639134
gi|221232939|ref|NC_011916.1|	16781	16800	CC_0013	+	18.966875	15.519362	14.450384
gi|221232939|ref|NC_011916.1|	16801	16820	CC_0013	+	18.903652	15.752736	14.399681
gi|221232939|ref|NC_011916.1|	16821	16840	CC_0013	+	19.978441	15.285988	15.413743
gi|221232939|ref|NC_011916.1|	16841	16860	CC_0013	+	18.334646	14.119119	13.233509
gi|221232939|ref|NC_011916.1|	16861	16880	CC_0013	+	19.28299	15.402675	15.36304
gi|221232939|ref|NC_011916.1|	16881	16900	CC_0013	+	18.271423	15.169301	13.841947
gi|221232939|ref|NC_011916.1|	16901	16920	CC_0013	+	21.400957	18.261505	15.160227
gi|221232939|ref|NC_011916.1|	16921	16940	CC_0013	+	22.855083	18.261505	16.427805
gi|221232939|ref|NC_011916.1|	16941	16960	CC_0013	+	24.467268	20.128496	17.999601
gi|221232939|ref|NC_011916.1|	16961	16980	CC_0013	+	25.13111	19.661749	18.050304
gi|221232939|ref|NC_011916.1|	16981	17000	CC_0013	+	24.214376	20.828617	17.492569
gi|221232939|ref|NC_011916.1|	17001	17020	CC_0013	+	22.412523	19.195	14.501087
gi|221232939|ref|NC_011916.1|	17021	17040	CC_0013	+	20.19972	18.84494	13.334915
gi|221232939|ref|NC_011916.1|	17041	17060	moaC	-	18.366257	17.328009	13.7405405
gi|221232939|ref|NC_011916.1|	17061	17080	moaC	-	20.642282	19.01997	16.732023
gi|221232939|ref|NC_011916.1|	17081	17100	moaC	-	22.096409	19.895123	19.064365
gi|221232939|ref|NC_011916.1|	17101	17120	moaC	-	22.570581	19.370031	20.534756
gi|221232939|ref|NC_011916.1|	17121	17140	moaC	-	20.642282	17.911444	19.013662
gi|221232939|ref|NC_011916.1|	17141	17160	moaC	-	21.780294	19.195	19.6221
gi|221232939|ref|NC_011916.1|	17161	17180	moaC	-	22.3493	19.72009	17.999601
gi|221232939|ref|NC_011916.1|	17181	17200	moaC	-	23.013142	19.953466	18.15171
gi|221232939|ref|NC_011916.1|	17201	17220	moaC	-	23.455702	21.120335	18.709444
gi|221232939|ref|NC_011916.1|	17221	17240	moaC	-	21.748682	20.420214	16.985538
gi|221232939|ref|NC_011916.1|	17241	17260	moaC	-	22.570581	21.52874	16.934835
gi|221232939|ref|NC_011916.1|	17261	17280	moaC	-	19.915218	20.303526	15.667258
gi|221232939|ref|NC_011916.1|	17281	17300	moaC	-	18.903652	19.72009	15.565852
gi|221232939|ref|NC_011916.1|	17301	17320	moaC	-	17.734028	18.611567	13.233509
gi|221232939|ref|NC_011916.1|	17321	17340	moaC	-	18.777206	17.794758	14.399681
gi|221232939|ref|NC_011916.1|	17341	17360	moaC	-	21.653849	17.561384	14.754602
gi|221232939|ref|NC_011916.1|	17361	17380	moaC	-	21.527403	18.028131	14.906712
gi|221232939|ref|NC_011916.1|	17381	17400	moaC	-	24.309212	20.5369	16.17429
gi|221232939|ref|NC_011916.1|	17401	17420	moaC	-	21.780294	19.778435	15.717961
gi|221232939|ref|NC_011916.1|	17421	17440	moaC	-	20.831951	19.136658	16.478508
gi|221232939|ref|NC_011916.1|	17441	17460	moaC	-	19.599104	17.094635	15.413743
gi|221232939|ref|NC_011916.1|	17461	17480	moaC	-	18.01853	16.744576	13.284212
gi|221232939|ref|NC_011916.1|	17481	17500	moaC	-	18.87204	15.98611	13.0814
gi|221232939|ref|NC_011916.1|	17501	17520	moaB	-	18.050142	13.885745	12.422259
gi|221232939|ref|NC_011916.1|	17521	17540	moaB	-	18.113365	14.46918	11.813823
gi|221232939|ref|NC_011916.1|	17541	17560	moaB	-	16.09023	11.78538	10.901167
gi|221232939|ref|NC_011916.1|	17561	17580	moaB	-	17.070187	13.710714	12.118041
gi|221232939|ref|NC_011916.1|	17581	17600	moaB	-	17.323078	12.310472	12.574369
gi|221232939|ref|NC_011916.1|	17601	17620	moaB	-	18.176588	13.944089	14.044759
gi|221232939|ref|NC_011916.1|	17621	17640	moaB	-	20.357779	15.344332	16.275696
gi|221232939|ref|NC_011916.1|	17641	17660	moaB	-	17.481136	13.30231	13.588431
gi|221232939|ref|NC_011916.1|	17661	17680	moaB	-	19.630714	15.811079	14.856009
gi|221232939|ref|NC_011916.1|	17681	17700	moaB	-	16.975353	14.002432	13.841947
gi|221232939|ref|NC_011916.1|	17701	17720	moaB	-	17.323078	13.944089	13.841947
gi|221232939|ref|NC_011916.1|	17721	17740	moaB	-	16.564404	12.718876	14.095462
gi|221232939|ref|NC_011916.1|	17741	17760	moaB	-	17.165022	11.843723	13.0814
gi|221232939|ref|NC_011916.1|	17761	17780	moaB	-	17.386301	12.018754	13.436321
gi|221232939|ref|NC_011916.1|	17781	17800	moaB	-	17.35469	13.185623	13.487025
gi|221232939|ref|NC_011916.1|	17801	17820	moaB	-	18.966875	15.636049	14.095462
gi|221232939|ref|NC_011916.1|	17821	17840	moaB	-	18.113365	15.577705	13.994056
gi|221232939|ref|NC_011916.1|	17841	17860	moaB	-	22.001574	17.561384	16.83343
gi|221232939|ref|NC_011916.1|	17861	17880	moaB	-	21.49579	17.794758	18.15171
gi|221232939|ref|NC_011916.1|	17881	17900	moaB	-	21.148066	18.494879	16.782726
gi|221232939|ref|NC_011916.1|	17901	17920	moaB	-	21.68546	19.136658	15.819367
gi|221232939|ref|NC_011916.1|	17921	17940	moaB	-	20.452614	18.203161	14.399681
gi|221232939|ref|NC_011916.1|	17941	17960	moaB	-	19.693937	17.444696	14.653196
gi|221232939|ref|NC_011916.1|	17961	17980	moaB	-	19.441046	16.277826	15.667258
gi|221232939|ref|NC_011916.1|	17981	18000	moaB	-	20.484224	17.736414	15.717961
gi|221232939|ref|NC_011916.1|	18001	18020	moaB	-	20.958397	17.67807	16.224993
gi|221232939|ref|NC_011916.1|	18021	18040	moaB	-	21.179676	17.619726	15.413743
gi|221232939|ref|NC_011916.1|	18041	18060	moaB	-	23.392479	18.786596	17.239054
gi|221232939|ref|NC_011916.1|	18061	18080	moaE	-	22.444136	17.561384	15.160227
gi|221232939|ref|NC_011916.1|	18081	18100	moaE	-	21.242899	16.686232	16.02218
gi|221232939|ref|NC_011916.1|	18101	18120	moaE	-	20.768728	15.110958	14.450384
gi|221232939|ref|NC_011916.1|	18121	18140	moaE	-	21.559013	14.46918	14.703899
gi|221232939|ref|NC_011916.1|	18141	18160	moaE	-	20.073275	12.427158	13.943353
gi|221232939|ref|NC_011916.1|	18161	18180	moaE	-	20.831951	13.30231	15.515149
gi|221232939|ref|NC_011916.1|	18181	18200	moaE	-	22.286077	14.294149	16.377102
gi|221232939|ref|NC_011916.1|	18201	18220	moaE	-	21.748682	14.2358055	16.427805
gi|221232939|ref|NC_011916.1|	18221	18240	moaE	-	24.309212	15.519362	16.123587
gi|221232939|ref|NC_011916.1|	18241	18260	moaE	-	22.538969	15.052614	15.565852
gi|221232939|ref|NC_011916.1|	18261	18280	moaE	-	23.708593	19.311687	18.455929
gi|221232939|ref|NC_011916.1|	18281	18300	moaE	-	22.602192	19.428375	17.593975
gi|221232939|ref|NC_011916.1|	18301	18320	moaE	-	23.550535	22.287205	19.419287
gi|221232939|ref|NC_011916.1|	18321	18340	moaE	-	22.254467	21.645426	16.732023
gi|221232939|ref|NC_011916.1|	18341	18360	moaE	-	22.949919	21.52874	18.202414
gi|221232939|ref|NC_011916.1|	18361	18380	moaE	-	22.823473	18.786596	16.17429
gi|221232939|ref|NC_011916.1|	18381	18400	moaE	-	23.708593	17.211323	17.492569
gi|221232939|ref|NC_011916.1|	18401	18420	moaE	-	22.665415	18.028131	16.326399
gi|221232939|ref|NC_011916.1|	18421	18440	moaE	-	24.119541	19.953466	16.224993
gi|221232939|ref|NC_011916.1|	18441	18460	moaE	-	23.64537	19.545061	16.377102
gi|221232939|ref|NC_011916.1|	18461	18480	moaE	-	21.179676	17.328009	14.653196
gi|221232939|ref|NC_011916.1|	18481	18500	moaE	-	20.262945	15.344332	16.123587
gi|221232939|ref|NC_011916.1|	18501	18520	moaD	-	20.262945	14.585867	15.464446
gi|221232939|ref|NC_011916.1|	18521	18540	moaD	-	20.326168	14.935927	15.819367
gi|221232939|ref|NC_011916.1|	18541	18560	moaD	-	19.72555	14.819241	14.501087
gi|221232939|ref|NC_011916.1|	18561	18580	moaD	-	20.357779	16.919605	13.994056
gi|221232939|ref|NC_011916.1|	18581	18600	moaD	-	18.587538	16.569544	13.132103
gi|221232939|ref|NC_011916.1|	18601	18620	moaD	-	21.084843	19.01997	15.768664
gi|221232939|ref|NC_011916.1|	18621	18640	moaD	-	20.262945	19.428375	15.9207735
gi|221232939|ref|NC_011916.1|	18641	18660	moaD	-	21.875128	19.370031	16.275696
gi|221232939|ref|NC_011916.1|	18661	18680	moaD	-	23.582148	21.353708	17.137648
gi|221232939|ref|NC_011916.1|	18681	18700	moaD	-	22.191242	18.84494	15.008118
gi|221232939|ref|NC_011916.1|	18701	18720	moaD	-	22.855083	18.961626	15.971477
gi|221232939|ref|NC_011916.1|	18721	18740	moaD	-	19.820383	16.97795	14.8053055
gi|221232939|ref|NC_011916.1|	18741	18760	moaA	-	21.400957	17.50304	16.326399
gi|221232939|ref|NC_011916.1|	18761	18780	moaA	-	20.737116	16.044453	15.312337
gi|221232939|ref|NC_011916.1|	18781	18800	moaA	-	20.421001	15.577705	14.298274
gi|221232939|ref|NC_011916.1|	18801	18820	moaA	-	19.915218	15.402675	13.182806
gi|221232939|ref|NC_011916.1|	18821	18840	moaA	-	20.863562	17.094635	14.906712
gi|221232939|ref|NC_011916.1|	18841	18860	moaA	-	20.104887	14.935927	15.21093
gi|221232939|ref|NC_011916.1|	18861	18880	moaA	-	20.705505	15.636049	15.312337
gi|221232939|ref|NC_011916.1|	18881	18900	moaA	-	19.504269	16.802917	15.464446
gi|221232939|ref|NC_011916.1|	18901	18920	moaA	-	19.409435	16.802917	14.247571
gi|221232939|ref|NC_011916.1|	18921	18940	moaA	-	18.903652	16.627888	14.906712
gi|221232939|ref|NC_011916.1|	18941	18960	moaA	-	16.153454	13.5940275	13.7405405
gi|221232939|ref|NC_011916.1|	18961	18980	moaA	-	18.081753	13.652371	15.109524
gi|221232939|ref|NC_011916.1|	18981	19000	moaA	-	16.24829	12.543845	13.436321
gi|221232939|ref|NC_011916.1|	19001	19020	moaA	-	16.91213	12.427158	13.436321
gi|221232939|ref|NC_011916.1|	19021	19040	moaA	-	16.46957	12.252128	12.574369
gi|221232939|ref|NC_011916.1|	19041	19060	moaA	-	17.35469	11.435319	11.915229
gi|221232939|ref|NC_011916.1|	19061	19080	moaA	-	17.765638	11.668694	11.408197
gi|221232939|ref|NC_011916.1|	19081	19100	moaA	-	15.963786	11.260289	10.394135
gi|221232939|ref|NC_011916.1|	19101	19120	moaA	-	17.860474	12.485502	12.472962
gi|221232939|ref|NC_011916.1|	19121	19140	moaA	-	15.110276	11.78538	12.016635
gi|221232939|ref|NC_011916.1|	19141	19160	moaA	-	15.458003	11.960411	13.588431
gi|221232939|ref|NC_011916.1|	19161	19180	moaA	-	16.09023	14.2358055	13.89265
gi|221232939|ref|NC_011916.1|	19181	19200	moaA	-	16.596016	14.64421	14.957415
gi|221232939|ref|NC_011916.1|	19201	19220	moaA	-	18.01853	14.994271	14.906712
gi|221232939|ref|NC_011916.1|	19221	19240	moaA	-	18.555925	15.461019	15.616555
gi|221232939|ref|NC_011916.1|	19241	19260	moaA	-	19.3146	16.277826	16.884132
gi|221232939|ref|NC_011916.1|	19261	19280	moaA	-	19.441046	17.036293	17.492569
gi|221232939|ref|NC_011916.1|	19281	19300	moaA	-	20.262945	18.611567	18.455929
gi|221232939|ref|NC_011916.1|	19301	19320	moaA	-	20.895174	19.428375	18.15171
gi|221232939|ref|NC_011916.1|	19321	19340	moaA	-	20.38939	18.553223	18.050304
gi|221232939|ref|NC_011916.1|	19341	19360	moaA	-	20.61067	18.84494	17.746086
gi|221232939|ref|NC_011916.1|	19361	19380	moaA	-	20.073275	17.036293	17.086945
gi|221232939|ref|NC_011916.1|	19381	19400	moaA	-	18.65076	15.344332	15.565852
gi|221232939|ref|NC_011916.1|	19401	19420	moaA	-	19.915218	15.811079	16.072884
gi|221232939|ref|NC_011916.1|	19421	19440	moaA	-	18.998486	15.285988	16.072884
gi|221232939|ref|NC_011916.1|	19441	19460	moaA	-	19.599104	16.744576	18.101007
gi|221232939|ref|NC_011916.1|	19461	19480	moaA	-	19.599104	17.152979	20.331944
gi|221232939|ref|NC_011916.1|	19481	19500	moaA	-	21.432568	20.245182	22.461473
gi|221232939|ref|NC_011916.1|	19501	19520	moaA	-	23.107975	21.06199	26.517721
gi|221232939|ref|NC_011916.1|	19521	19540	moaA	-	24.53049	22.462234	27.63319
gi|221232939|ref|NC_011916.1|	19541	19560	moaA	-	26.553625	23.862478	28.850065
gi|221232939|ref|NC_011916.1|	19561	19580	moaA	-	25.700115	22.753952	30.624674
gi|221232939|ref|NC_011916.1|	19581	19600	moaA	-	27.470356	25.554438	33.464046
gi|221232939|ref|NC_011916.1|	19601	19620	moaA	-	29.809605	29.638481	39.85264
gi|221232939|ref|NC_011916.1|	19621	19640	moaA	-	31.89596	35.35614	44.1624
gi|221232939|ref|NC_011916.1|	19641	19660	moaA	-	33.666203	38.448345	51.717163
gi|221232939|ref|NC_011916.1|	19661	19680	moaA	-	35.75256	41.0738	59.01841
gi|221232939|ref|NC_011916.1|	19681	19700	moaA	-	35.97384	41.71558	67.68864
gi|221232939|ref|NC_011916.1|	19701	19720	moaA	-	37.5228	43.699257	74.634964
gi|221232939|ref|NC_011916.1|	19721	19740	moaA	-	35.942226	42.824104	74.43215
gi|221232939|ref|NC_011916.1|	19741	19760	moaA	-	37.617634	48.48342	79.80668
gi|221232939|ref|NC_011916.1|	19761	19780	moaA	-	34.10876	46.4414	83.55871
gi|221232939|ref|NC_011916.1|	19781	19800	moaA	-	30.757948	41.423862	75.04059
gi|221232939|ref|NC_011916.1|	19801	19820	CC_0019	+	24.562103	30.63032	64.291534
gi|221232939|ref|NC_011916.1|	19821	19840	CC_0019	+	24.245987	29.638481	59.778957
gi|221232939|ref|NC_011916.1|	19841	19860	CC_0019	+	23.360867	25.496096	47.863728
gi|221232939|ref|NC_011916.1|	19861	19880	CC_0019	+	21.369345	21.70377	38.63576
gi|221232939|ref|NC_011916.1|	19881	19900	CC_0019	+	18.461092	19.72009	28.799362
gi|221232939|ref|NC_011916.1|	19901	19920	CC_0019	+	13.529704	13.30231	19.064365
gi|221232939|ref|NC_011916.1|	19921	19940	CC_0019	+	13.466481	11.78538	14.501087
gi|221232939|ref|NC_011916.1|	19941	19960	CC_0019	+	13.118754	11.727036	13.132103
gi|221232939|ref|NC_011916.1|	19961	19980	CC_0019	+	13.181978	10.793541	12.777182
gi|221232939|ref|NC_011916.1|	19981	20000	CC_0019	+	13.782596	10.910228	13.030697
gi|221232939|ref|NC_011916.1|	20001	20020	CC_0019	+	14.667716	10.735198	12.675776
gi|221232939|ref|NC_011916.1|	20021	20040	CC_0019	+	14.920608	13.477341	13.385618
gi|221232939|ref|NC_011916.1|	20041	20060	CC_0019	+	16.24829	15.461019	14.501087
gi|221232939|ref|NC_011916.1|	20061	20080	CC_0019	+	16.722462	16.394514	15.109524
gi|221232939|ref|NC_011916.1|	20081	20100	CC_0019	+	17.35469	18.319849	17.593975
gi|221232939|ref|NC_011916.1|	20101	20120	CC_0019	+	19.978441	20.653587	19.875616
gi|221232939|ref|NC_011916.1|	20121	20140	CC_0019	+	20.073275	22.462234	21.75163
gi|221232939|ref|NC_011916.1|	20141	20160	CC_0019	+	22.949919	25.962843	25.858582
gi|221232939|ref|NC_011916.1|	20161	20180	CC_0019	+	25.731726	28.179893	28.697954
gi|221232939|ref|NC_011916.1|	20181	20200	CC_0019	+	25.668503	29.755167	30.624674
gi|221232939|ref|NC_011916.1|	20201	20220	CC_0019	+	25.067886	28.821672	30.523266
gi|221232939|ref|NC_011916.1|	20221	20240	CC_0019	+	25.921394	31.15541	31.689438
gi|221232939|ref|NC_011916.1|	20241	20260	CC_0019	+	25.794949	33.430805	33.007717
gi|221232939|ref|NC_011916.1|	20261	20280	CC_0019	+	27.407133	34.889393	36.759747
gi|221232939|ref|NC_011916.1|	20281	20300	CC_0019	+	27.944529	36.056263	41.37373
gi|221232939|ref|NC_011916.1|	20301	20320	CC_0019	+	27.691637	34.305958	42.286385
gi|221232939|ref|NC_011916.1|	20321	20340	CC_0019	+	26.553625	32.49731	40.207558
gi|221232939|ref|NC_011916.1|	20341	20360	CC_0019	+	25.921394	31.680502	39.04139
gi|221232939|ref|NC_011916.1|	20361	20380	CC_0019	+	24.151154	28.646643	37.976624
gi|221232939|ref|NC_011916.1|	20381	20400	CC_0019	+	25.984617	32.964058	41.37373
gi|221232939|ref|NC_011916.1|	20401	20420	CC_0019	+	24.94144	29.755167	38.686466
gi|221232939|ref|NC_011916.1|	20421	20440	CC_0019	+	28.513535	36.114605	42.38779
gi|221232939|ref|NC_011916.1|	20441	20460	CC_0019	+	28.007751	40.490364	43.65537
gi|221232939|ref|NC_011916.1|	20461	20480	CC_0020	-	28.292253	43.40754	46.241226
gi|221232939|ref|NC_011916.1|	20481	20500	CC_0020	-	29.335432	52.33409	54.25232
gi|221232939|ref|NC_011916.1|	20501	20520	CC_0020	-	27.596802	49.241886	52.02138
gi|221232939|ref|NC_011916.1|	20521	20540	CC_0020	-	31.358566	56.418133	62.31411
gi|221232939|ref|NC_011916.1|	20541	20560	CC_0020	-	30.12572	54.434456	60.84372
gi|221232939|ref|NC_011916.1|	20561	20580	CC_0020	-	30.694725	50.933846	57.09169
gi|221232939|ref|NC_011916.1|	20581	20600	CC_0020	-	30.220552	48.075016	55.519894
gi|221232939|ref|NC_011916.1|	20601	20620	CC_0020	-	33.729424	54.842857	61.857784
gi|221232939|ref|NC_011916.1|	20621	20640	CC_0020	-	35.12033	54.14274	62.82114
gi|221232939|ref|NC_011916.1|	20641	20660	CC_0020	-	38.56598	64.23616	68.043564
gi|221232939|ref|NC_011916.1|	20661	20680	CC_0020	-	49.756435	80.98073	81.58129
gi|221232939|ref|NC_011916.1|	20681	20700	null		50.704777	86.87342	87.71636
gi|221232939|ref|NC_011916.1|	20701	20720	null		54.65621	91.24918	94.611984
gi|221232939|ref|NC_011916.1|	20721	20740	null		53.518196	89.09047	94.10496
gi|221232939|ref|NC_011916.1|	20741	20760	null		55.92067	94.28304	100.03722
gi|221232939|ref|NC_011916.1|	20761	20780	null		54.308483	86.640045	92.48245
gi|221232939|ref|NC_011916.1|	20781	20800	null		53.044025	84.65637	84.9277
gi|221232939|ref|NC_011916.1|	20801	20820	null		47.29074	74.15455	72.20122
gi|221232939|ref|NC_011916.1|	20821	20840	CC_0021	-	42.612244	67.56174	61.30005
gi|221232939|ref|NC_011916.1|	20841	20860	CC_0021	-	38.88209	62.13579	53.846695
gi|221232939|ref|NC_011916.1|	20861	20880	CC_0021	-	32.433357	46.96649	40.004745
gi|221232939|ref|NC_011916.1|	20881	20900	CC_0021	-	26.90135	34.422646	30.117641
gi|221232939|ref|NC_011916.1|	20901	20920	CC_0021	-	20.926785	22.053831	19.92632
gi|221232939|ref|NC_011916.1|	20921	20940	CC_0021	-	18.682371	17.8531	14.501087
gi|221232939|ref|NC_011916.1|	20941	20960	CC_0021	-	16.94374	16.452858	13.0814
gi|221232939|ref|NC_011916.1|	20961	20980	CC_0021	-	15.647672	14.119119	11.5096035
gi|221232939|ref|NC_011916.1|	20981	21000	CC_0021	-	14.636105	11.026916	9.887105
gi|221232939|ref|NC_011916.1|	21001	21020	CC_0021	-	14.446436	11.026916	10.292729
gi|221232939|ref|NC_011916.1|	21021	21040	CC_0021	-	15.4896145	10.676854	10.343432
gi|221232939|ref|NC_011916.1|	21041	21060	CC_0021	-	15.268334	11.843723	10.749058
gi|221232939|ref|NC_011916.1|	21061	21080	CC_0021	-	16.216679	11.960411	11.103979
gi|221232939|ref|NC_011916.1|	21081	21100	CC_0021	-	16.46957	12.602189	12.219447
gi|221232939|ref|NC_011916.1|	21101	21120	CC_0021	-	16.027008	12.835563	11.611011
gi|221232939|ref|NC_011916.1|	21121	21140	CC_0021	-	16.91213	12.368814	12.118041
gi|221232939|ref|NC_011916.1|	21141	21160	CC_0021	-	17.828861	14.46918	12.777182
gi|221232939|ref|NC_011916.1|	21161	21180	CC_0021	-	17.417913	12.777219	12.777182
gi|221232939|ref|NC_011916.1|	21181	21200	CC_0021	-	17.165022	12.485502	11.965932
gi|221232939|ref|NC_011916.1|	21201	21220	CC_0021	-	17.860474	13.243967	13.487025
gi|221232939|ref|NC_011916.1|	21221	21240	CC_0021	-	17.386301	11.668694	12.219447
gi|221232939|ref|NC_011916.1|	21241	21260	CC_0021	-	19.188154	14.2358055	12.574369
gi|221232939|ref|NC_011916.1|	21261	21280	CC_0021	-	17.512747	12.427158	10.901167
gi|221232939|ref|NC_011916.1|	21281	21300	CC_0021	-	19.788773	14.410836	13.182806
gi|221232939|ref|NC_011916.1|	21301	21320	CC_0021	-	19.030098	13.944089	12.472962
gi|221232939|ref|NC_011916.1|	21321	21340	CC_0021	-	18.903652	13.769058	12.168744
gi|221232939|ref|NC_011916.1|	21341	21360	CC_0021	-	20.515837	15.752736	13.487025
gi|221232939|ref|NC_011916.1|	21361	21380	CC_0021	-	18.524315	13.535685	11.864526
gi|221232939|ref|NC_011916.1|	21381	21400	CC_0021	-	17.955307	13.418997	12.067338
gi|221232939|ref|NC_011916.1|	21401	21420	CC_0021	-	17.828861	12.95225	12.219447
gi|221232939|ref|NC_011916.1|	21421	21440	CC_0021	-	17.259855	11.902067	11.915229
gi|221232939|ref|NC_011916.1|	21441	21460	CC_0021	-	16.532793	11.960411	12.523666
gi|221232939|ref|NC_011916.1|	21461	21480	CC_0021	-	17.259855	13.243967	13.689837
gi|221232939|ref|NC_011916.1|	21481	21500	CC_0021	-	18.23981	13.535685	13.233509
gi|221232939|ref|NC_011916.1|	21501	21520	CC_0021	-	18.23981	13.710714	12.777182
gi|221232939|ref|NC_011916.1|	21521	21540	CC_0021	-	17.57597	13.010593	12.878588
gi|221232939|ref|NC_011916.1|	21541	21560	CC_0021	-	16.09023	11.435319	12.523666
gi|221232939|ref|NC_011916.1|	21561	21580	CC_0021	-	17.35469	11.668694	14.044759
gi|221232939|ref|NC_011916.1|	21581	21600	CC_0021	-	18.461092	12.310472	14.399681
gi|221232939|ref|NC_011916.1|	21601	21620	CC_0021	-	16.05862	11.143602	12.827885
gi|221232939|ref|NC_011916.1|	21621	21640	CC_0021	-	15.710895	11.668694	13.0814
gi|221232939|ref|NC_011916.1|	21641	21660	CC_0021	-	16.216679	12.368814	13.385618
gi|221232939|ref|NC_011916.1|	21661	21680	CC_0021	-	15.900563	11.960411	12.726479
gi|221232939|ref|NC_011916.1|	21681	21700	CC_0021	-	15.647672	11.960411	11.408197
gi|221232939|ref|NC_011916.1|	21701	21720	CC_0021	-	16.817295	11.376976	12.27015
gi|221232939|ref|NC_011916.1|	21721	21740	CC_0021	-	16.185066	10.735198	11.76312
gi|221232939|ref|NC_011916.1|	21741	21760	CC_0021	-	17.449524	11.376976	13.233509
gi|221232939|ref|NC_011916.1|	21761	21780	CC_0021	-	16.785685	11.318632	13.182806
gi|221232939|ref|NC_011916.1|	21781	21800	CC_0021	-	16.627626	12.485502	12.27015
gi|221232939|ref|NC_011916.1|	21801	21820	CC_0021	-	16.24829	10.851885	10.647651
gi|221232939|ref|NC_011916.1|	21821	21840	CC_0021	-	15.932175	12.018754	11.205385
gi|221232939|ref|NC_011916.1|	21841	21860	CC_0021	-	15.015442	10.4434805	10.799761
gi|221232939|ref|NC_011916.1|	21861	21880	CC_0021	-	15.584449	11.318632	12.016635
gi|221232939|ref|NC_011916.1|	21881	21900	CC_0021	-	15.868952	11.61035	12.472962
gi|221232939|ref|NC_011916.1|	21901	21920	CC_0021	-	15.710895	11.843723	12.777182
gi|221232939|ref|NC_011916.1|	21921	21940	CC_0021	-	17.54436	14.410836	15.109524
gi|221232939|ref|NC_011916.1|	21941	21960	CC_0021	-	18.176588	15.052614	14.703899
gi|221232939|ref|NC_011916.1|	21961	21980	CC_0021	-	19.061708	15.694392	14.856009
gi|221232939|ref|NC_011916.1|	21981	22000	CC_0021	-	19.535881	14.64421	14.602493
gi|221232939|ref|NC_011916.1|	22001	22020	CC_0021	-	20.357779	15.052614	15.515149
gi|221232939|ref|NC_011916.1|	22021	22040	CC_0021	-	21.717072	15.344332	16.275696
gi|221232939|ref|NC_011916.1|	22041	22060	CC_0021	-	22.064796	16.277826	15.261633
gi|221232939|ref|NC_011916.1|	22061	22080	CC_0021	-	21.337734	18.611567	16.478508
gi|221232939|ref|NC_011916.1|	22081	22100	CC_0021	-	19.75716	17.736414	15.9207735
gi|221232939|ref|NC_011916.1|	22101	22120	CC_0021	-	20.104887	18.553223	16.123587
gi|221232939|ref|NC_011916.1|	22121	22140	CC_0021	-	19.946829	17.094635	15.464446
gi|221232939|ref|NC_011916.1|	22141	22160	CC_0021	-	23.107975	17.386353	17.18835
gi|221232939|ref|NC_011916.1|	22161	22180	CC_0021	-	21.717072	16.686232	15.616555
gi|221232939|ref|NC_011916.1|	22181	22200	CC_0021	-	20.990007	14.527523	15.109524
gi|221232939|ref|NC_011916.1|	22201	22220	CC_0021	-	19.377823	14.935927	14.044759
gi|221232939|ref|NC_011916.1|	22221	22240	CC_0021	-	17.892084	13.5940275	12.219447
gi|221232939|ref|NC_011916.1|	22241	22260	CC_0021	-	17.196632	13.5940275	12.371556
gi|221232939|ref|NC_011916.1|	22261	22280	CC_0021	-	16.532793	14.64421	11.915229
gi|221232939|ref|NC_011916.1|	22281	22300	CC_0021	-	16.91213	15.461019	12.827885
gi|221232939|ref|NC_011916.1|	22301	22320	CC_0021	-	16.532793	14.294149	12.929291
gi|221232939|ref|NC_011916.1|	22321	22340	CC_0021	-	16.754072	13.652371	12.320853
gi|221232939|ref|NC_011916.1|	22341	22360	CC_0021	-	18.01853	13.418997	13.385618
gi|221232939|ref|NC_011916.1|	22361	22380	CC_0021	-	17.006964	14.119119	12.016635
gi|221232939|ref|NC_011916.1|	22381	22400	CC_0021	-	17.955307	13.243967	12.827885
gi|221232939|ref|NC_011916.1|	22401	22420	CC_0021	-	18.01853	12.718876	13.385618
gi|221232939|ref|NC_011916.1|	22421	22440	CC_0021	-	17.259855	12.193785	13.0814
gi|221232939|ref|NC_011916.1|	22441	22460	CC_0021	-	16.532793	11.960411	13.841947
gi|221232939|ref|NC_011916.1|	22461	22480	CC_0021	-	15.552837	12.077098	12.675776
gi|221232939|ref|NC_011916.1|	22481	22500	CC_0021	-	15.521226	11.843723	11.712417
gi|221232939|ref|NC_011916.1|	22501	22520	CC_0021	-	16.185066	12.368814	11.4589
gi|221232939|ref|NC_011916.1|	22521	22540	CC_0021	-	15.584449	11.376976	10.089917
gi|221232939|ref|NC_011916.1|	22541	22560	CC_0021	-	15.268334	11.668694	10.647651
gi|221232939|ref|NC_011916.1|	22561	22580	CC_0021	-	16.121843	11.727036	10.444839
gi|221232939|ref|NC_011916.1|	22581	22600	CC_0021	-	16.564404	12.777219	11.611011
gi|221232939|ref|NC_011916.1|	22601	22620	CC_0021	-	18.271423	14.410836	12.371556
gi|221232939|ref|NC_011916.1|	22621	22640	CC_0021	-	17.828861	13.769058	11.611011
gi|221232939|ref|NC_011916.1|	22641	22660	CC_0021	-	17.481136	13.652371	12.320853
gi|221232939|ref|NC_011916.1|	22661	22680	CC_0021	-	16.91213	13.068936	12.371556
gi|221232939|ref|NC_011916.1|	22681	22700	CC_0021	-	17.892084	14.352492	13.791244
gi|221232939|ref|NC_011916.1|	22701	22720	CC_0021	-	17.070187	14.819241	13.284212
gi|221232939|ref|NC_011916.1|	22721	22740	CC_0021	-	16.46957	16.219484	12.726479
gi|221232939|ref|NC_011916.1|	22741	22760	CC_0021	-	17.386301	17.619726	14.55179
gi|221232939|ref|NC_011916.1|	22761	22780	CC_0021	-	17.670805	18.494879	13.791244
gi|221232939|ref|NC_011916.1|	22781	22800	CC_0021	-	18.461092	18.028131	13.588431
gi|221232939|ref|NC_011916.1|	22801	22820	CC_0021	-	19.851995	17.911444	12.219447
gi|221232939|ref|NC_011916.1|	22821	22840	CC_0021	-	20.010052	15.752736	13.182806
gi|221232939|ref|NC_011916.1|	22841	22860	CC_0021	-	18.713984	14.8775835	12.777182
gi|221232939|ref|NC_011916.1|	22861	22880	CC_0021	-	20.452614	16.452858	15.21093
gi|221232939|ref|NC_011916.1|	22881	22900	CC_0021	-	18.903652	15.461019	12.878588
gi|221232939|ref|NC_011916.1|	22901	22920	CC_0021	-	17.734028	16.33617	12.878588
gi|221232939|ref|NC_011916.1|	22921	22940	CC_0021	-	16.46957	14.64421	11.611011
gi|221232939|ref|NC_011916.1|	22941	22960	CC_0021	-	15.584449	14.352492	10.799761
gi|221232939|ref|NC_011916.1|	22961	22980	CC_0021	-	17.070187	14.760897	11.357494
gi|221232939|ref|NC_011916.1|	22981	23000	CC_0021	-	17.955307	14.060776	12.016635
gi|221232939|ref|NC_011916.1|	23001	23020	CC_0021	-	17.35469	13.710714	13.030697
gi|221232939|ref|NC_011916.1|	23021	23040	CC_0021	-	18.23981	14.352492	14.146165
gi|221232939|ref|NC_011916.1|	23041	23060	CC_0022	-	17.828861	14.177463	13.791244
gi|221232939|ref|NC_011916.1|	23061	23080	CC_0022	-	18.966875	15.285988	13.182806
gi|221232939|ref|NC_011916.1|	23081	23100	CC_0022	-	19.915218	16.044453	14.348977
gi|221232939|ref|NC_011916.1|	23101	23120	CC_0022	-	18.87204	15.927766	13.89265
gi|221232939|ref|NC_011916.1|	23121	23140	CC_0022	-	20.547447	17.328009	15.9207735
gi|221232939|ref|NC_011916.1|	23141	23160	CC_0022	-	17.828861	16.102797	13.436321
gi|221232939|ref|NC_011916.1|	23161	23180	CC_0022	-	17.98692	15.927766	16.17429
gi|221232939|ref|NC_011916.1|	23181	23200	CC_0022	-	17.13341	15.052614	15.464446
gi|221232939|ref|NC_011916.1|	23201	23220	CC_0022	-	18.808817	17.619726	16.529211
gi|221232939|ref|NC_011916.1|	23221	23240	CC_0022	-	18.713984	17.561384	15.261633
gi|221232939|ref|NC_011916.1|	23241	23260	CC_0022	-	18.619148	17.736414	15.261633
gi|221232939|ref|NC_011916.1|	23261	23280	CC_0022	-	17.79725	16.627888	14.399681
gi|221232939|ref|NC_011916.1|	23281	23300	CC_0022	-	19.599104	16.394514	14.754602
gi|221232939|ref|NC_011916.1|	23301	23320	CC_0022	-	18.84043	16.102797	14.348977
gi|221232939|ref|NC_011916.1|	23321	23340	CC_0022	-	17.828861	15.811079	13.639134
gi|221232939|ref|NC_011916.1|	23341	23360	CC_0022	-	18.176588	15.811079	14.653196
gi|221232939|ref|NC_011916.1|	23361	23380	CC_0022	-	16.121843	16.044453	13.791244
gi|221232939|ref|NC_011916.1|	23381	23400	CC_0022	-	16.659239	15.811079	13.537728
gi|221232939|ref|NC_011916.1|	23401	23420	CC_0022	-	17.196632	16.627888	13.385618
gi|221232939|ref|NC_011916.1|	23421	23440	CC_0022	-	18.23981	18.319849	14.399681
gi|221232939|ref|NC_011916.1|	23441	23460	CC_0022	-	21.337734	20.653587	17.34046
gi|221232939|ref|NC_011916.1|	23461	23480	CC_0022	-	20.484224	21.178679	17.036242
gi|221232939|ref|NC_011916.1|	23481	23500	CC_0022	-	24.245987	26.371246	18.96296
gi|221232939|ref|NC_011916.1|	23501	23520	CC_0022	-	25.194332	26.25456	18.861553
gi|221232939|ref|NC_011916.1|	23521	23540	CC_0022	-	24.593714	26.954681	18.912256
gi|221232939|ref|NC_011916.1|	23541	23560	CC_0022	-	27.375523	29.11339	21.700928
gi|221232939|ref|NC_011916.1|	23561	23580	null		26.142675	29.230076	22.309364
gi|221232939|ref|NC_011916.1|	23581	23600	null		26.332344	28.704985	21.498116
gi|221232939|ref|NC_011916.1|	23601	23620	CC_0023	+	26.04784	27.94652	20.636162
gi|221232939|ref|NC_011916.1|	23621	23640	CC_0023	+	26.205898	29.055046	19.520695
gi|221232939|ref|NC_011916.1|	23641	23660	CC_0023	+	27.027796	31.447128	20.585459
gi|221232939|ref|NC_011916.1|	23661	23680	CC_0023	+	30.663115	32.32228	24.793816
gi|221232939|ref|NC_011916.1|	23681	23700	CC_0023	+	30.916006	31.79719	25.706472
gi|221232939|ref|NC_011916.1|	23701	23720	CC_0023	+	28.355478	25.554438	23.931864
gi|221232939|ref|NC_011916.1|	23721	23740	CC_0023	+	28.734816	27.421429	23.37413
gi|221232939|ref|NC_011916.1|	23741	23760	CC_0023	+	26.806517	26.721308	21.09249
gi|221232939|ref|NC_011916.1|	23761	23780	CC_0023	+	26.111063	27.421429	21.447412
gi|221232939|ref|NC_011916.1|	23781	23800	CC_0023	+	26.142675	24.679287	21.650225
gi|221232939|ref|NC_011916.1|	23801	23820	CC_0023	+	25.668503	23.979164	23.678349
gi|221232939|ref|NC_011916.1|	23821	23840	CC_0023	+	26.522013	24.737629	24.03327
gi|221232939|ref|NC_011916.1|	23841	23860	CC_0023	+	22.855083	22.053831	19.115068
gi|221232939|ref|NC_011916.1|	23861	23880	CC_0023	+	21.90674	19.545061	18.709444
gi|221232939|ref|NC_011916.1|	23881	23900	CC_0023	+	19.535881	17.444696	14.754602
gi|221232939|ref|NC_011916.1|	23901	23920	CC_0023	+	18.84043	15.169301	14.653196
gi|221232939|ref|NC_011916.1|	23921	23940	CC_0023	+	17.512747	14.760897	12.878588
gi|221232939|ref|NC_011916.1|	23941	23960	CC_0023	+	18.334646	17.152979	13.334915
gi|221232939|ref|NC_011916.1|	23961	23980	CC_0023	+	17.449524	15.227645	12.168744
gi|221232939|ref|NC_011916.1|	23981	24000	CC_0023	+	17.101799	15.98611	12.675776
gi|221232939|ref|NC_011916.1|	24001	24020	CC_0023	+	16.027008	13.010593	11.611011
gi|221232939|ref|NC_011916.1|	24021	24040	CC_0023	+	15.932175	11.143602	10.95187
gi|221232939|ref|NC_011916.1|	24041	24060	CC_0023	+	15.83734	10.735198	10.850464
gi|221232939|ref|NC_011916.1|	24061	24080	CC_0023	+	16.659239	12.718876	11.103979
gi|221232939|ref|NC_011916.1|	24081	24100	CC_0024	+	16.279902	14.002432	11.205385
gi|221232939|ref|NC_011916.1|	24101	24120	CC_0024	+	18.113365	14.935927	11.002573
gi|221232939|ref|NC_011916.1|	24121	24140	CC_0024	+	19.504269	15.694392	12.219447
gi|221232939|ref|NC_011916.1|	24141	24160	CC_0024	+	20.041664	13.769058	11.712417
gi|221232939|ref|NC_011916.1|	24161	24180	CC_0024	+	19.946829	16.219484	13.588431
gi|221232939|ref|NC_011916.1|	24181	24200	CC_0024	+	19.662327	16.102797	13.689837
gi|221232939|ref|NC_011916.1|	24201	24220	CC_0024	+	17.765638	15.869423	12.979994
gi|221232939|ref|NC_011916.1|	24221	24240	CC_0024	+	15.363169	13.185623	11.205385
gi|221232939|ref|NC_011916.1|	24241	24260	CC_0024	+	14.035487	12.252128	9.734995
gi|221232939|ref|NC_011916.1|	24261	24280	CC_0024	+	12.992309	11.201945	9.278667
gi|221232939|ref|NC_011916.1|	24281	24300	CC_0024	+	12.929086	10.4434805	8.923746
gi|221232939|ref|NC_011916.1|	24301	24320	CC_0024	+	11.1272335	8.693176	7.4026527
gi|221232939|ref|NC_011916.1|	24321	24340	CC_0024	+	12.296857	9.626672	8.163199
gi|221232939|ref|NC_011916.1|	24341	24360	CC_0024	+	11.348514	9.393298	7.6561685
gi|221232939|ref|NC_011916.1|	24361	24380	CC_0024	+	12.454914	10.035076	8.061793
gi|221232939|ref|NC_011916.1|	24381	24400	CC_0024	+	12.202023	10.326794	9.025152
gi|221232939|ref|NC_011916.1|	24401	24420	CC_0024	+	12.107188	9.568329	8.974449
gi|221232939|ref|NC_011916.1|	24421	24440	CC_0024	+	11.190456	9.860045	8.2646055
gi|221232939|ref|NC_011916.1|	24441	24460	CC_0024	+	12.707806	11.201945	9.430777
gi|221232939|ref|NC_011916.1|	24461	24480	CC_0024	+	13.909041	12.018754	9.126558
gi|221232939|ref|NC_011916.1|	24481	24500	CC_0024	+	13.624538	11.318632	8.518121
gi|221232939|ref|NC_011916.1|	24501	24520	CC_0024	+	12.80264	10.4434805	8.974449
gi|221232939|ref|NC_011916.1|	24521	24540	CC_0024	+	12.834251	10.618511	9.3293705
gi|221232939|ref|NC_011916.1|	24541	24560	CC_0024	+	12.296857	11.376976	9.177261
gi|221232939|ref|NC_011916.1|	24561	24580	CC_0024	+	12.296857	12.310472	9.582886
gi|221232939|ref|NC_011916.1|	24581	24600	CC_0024	+	12.233634	11.552007	9.532183
gi|221232939|ref|NC_011916.1|	24601	24620	CC_0024	+	11.474959	11.143602	9.734995
gi|221232939|ref|NC_011916.1|	24621	24640	CC_0024	+	11.4117365	10.385137	9.177261
gi|221232939|ref|NC_011916.1|	24641	24660	CC_0024	+	11.000787	10.326794	9.48148
gi|221232939|ref|NC_011916.1|	24661	24680	CC_0024	+	10.589838	10.09342	9.075855
gi|221232939|ref|NC_011916.1|	24681	24700	CC_0024	+	12.043965	10.851885	9.278667
gi|221232939|ref|NC_011916.1|	24701	24720	CC_0024	+	14.09871	11.201945	9.582886
gi|221232939|ref|NC_011916.1|	24721	24740	CC_0024	+	15.932175	12.427158	11.408197
gi|221232939|ref|NC_011916.1|	24741	24760	CC_0024	+	16.343124	12.777219	12.320853
gi|221232939|ref|NC_011916.1|	24761	24780	CC_0024	+	15.742506	13.30231	11.965932
gi|221232939|ref|NC_011916.1|	24781	24800	CC_0024	+	16.24829	14.2358055	12.777182
gi|221232939|ref|NC_011916.1|	24801	24820	CC_0024	+	15.995398	14.585867	13.689837
gi|221232939|ref|NC_011916.1|	24821	24840	CC_0024	+	16.311512	14.002432	13.639134
gi|221232939|ref|NC_011916.1|	24841	24860	CC_0024	+	16.374735	14.410836	13.943353
gi|221232939|ref|NC_011916.1|	24861	24880	CC_0024	+	17.038576	13.827401	13.436321
gi|221232939|ref|NC_011916.1|	24881	24900	CC_0024	+	18.84043	14.702554	13.436321
gi|221232939|ref|NC_011916.1|	24901	24920	CC_0024	+	18.808817	13.418997	13.436321
gi|221232939|ref|NC_011916.1|	24921	24940	CC_0024	+	18.081753	11.960411	11.661714
gi|221232939|ref|NC_011916.1|	24941	24960	CC_0024	+	16.91213	12.835563	11.205385
gi|221232939|ref|NC_011916.1|	24961	24980	CC_0024	+	17.259855	12.95225	11.76312
gi|221232939|ref|NC_011916.1|	24981	25000	CC_0024	+	18.176588	13.243967	12.320853
gi|221232939|ref|NC_011916.1|	25001	25020	CC_0025	-	18.334646	12.835563	12.472962
gi|221232939|ref|NC_011916.1|	25021	25040	CC_0025	-	19.28299	13.5940275	12.979994
gi|221232939|ref|NC_011916.1|	25041	25060	CC_0025	-	17.070187	13.944089	12.523666
gi|221232939|ref|NC_011916.1|	25061	25080	CC_0025	-	17.702415	14.585867	12.27015
gi|221232939|ref|NC_011916.1|	25081	25100	CC_0025	-	19.915218	15.752736	14.146165
gi|221232939|ref|NC_011916.1|	25101	25120	CC_0025	-	22.538969	16.16114	14.501087
gi|221232939|ref|NC_011916.1|	25121	25140	CC_0025	-	24.024708	17.211323	17.391163
gi|221232939|ref|NC_011916.1|	25141	25160	CC_0025	-	22.254467	15.110958	16.123587
gi|221232939|ref|NC_011916.1|	25161	25180	CC_0025	-	22.31769	16.16114	16.68132
gi|221232939|ref|NC_011916.1|	25181	25200	CC_0025	-	20.262945	16.452858	14.501087
gi|221232939|ref|NC_011916.1|	25201	25220	CC_0025	-	22.507359	18.378191	14.450384
gi|221232939|ref|NC_011916.1|	25221	25240	CC_0025	-	22.254467	19.953466	14.095462
gi|221232939|ref|NC_011916.1|	25241	25260	CC_0025	-	23.044752	20.245182	14.957415
gi|221232939|ref|NC_011916.1|	25261	25280	CC_0025	-	23.929873	19.486717	16.326399
gi|221232939|ref|NC_011916.1|	25281	25300	CC_0025	-	22.918306	17.211323	17.239054
gi|221232939|ref|NC_011916.1|	25301	25320	CC_0025	-	19.883606	15.285988	15.717961
gi|221232939|ref|NC_011916.1|	25321	25340	CC_0025	-	18.524315	13.710714	14.095462
gi|221232939|ref|NC_011916.1|	25341	25360	CC_0025	-	18.39787	12.485502	13.436321
gi|221232939|ref|NC_011916.1|	25361	25380	CC_0025	-	18.555925	12.777219	13.943353
gi|221232939|ref|NC_011916.1|	25381	25400	CC_0025	-	18.808817	13.827401	14.298274
gi|221232939|ref|NC_011916.1|	25401	25420	CC_0025	-	17.449524	13.12728	13.385618
gi|221232939|ref|NC_011916.1|	25421	25440	CC_0025	-	19.061708	13.185623	12.979994
gi|221232939|ref|NC_011916.1|	25441	25460	CC_0025	-	20.262945	14.119119	13.385618
gi|221232939|ref|NC_011916.1|	25461	25480	CC_0025	-	20.547447	13.535685	12.219447
gi|221232939|ref|NC_011916.1|	25481	25500	CC_0025	-	19.219767	12.602189	11.560307
gi|221232939|ref|NC_011916.1|	25501	25520	CC_0025	-	17.386301	11.143602	10.647651
gi|221232939|ref|NC_011916.1|	25521	25540	CC_0025	-	17.291468	11.78538	9.937808
gi|221232939|ref|NC_011916.1|	25541	25560	CC_0025	-	15.963786	10.968572	10.292729
gi|221232939|ref|NC_011916.1|	25561	25580	CC_0025	-	16.216679	11.727036	10.394135
gi|221232939|ref|NC_011916.1|	25581	25600	CC_0025	-	16.24829	11.260289	11.4589
gi|221232939|ref|NC_011916.1|	25601	25620	CC_0025	-	17.323078	12.485502	12.675776
gi|221232939|ref|NC_011916.1|	25621	25640	CC_0025	-	17.98692	14.352492	13.89265
gi|221232939|ref|NC_011916.1|	25641	25660	CC_0025	-	16.153454	14.702554	13.689837
gi|221232939|ref|NC_011916.1|	25661	25680	CC_0025	-	16.311512	14.585867	14.146165
gi|221232939|ref|NC_011916.1|	25681	25700	CC_0025	-	16.91213	14.702554	15.413743
gi|221232939|ref|NC_011916.1|	25701	25720	CC_0025	-	17.98692	15.752736	15.819367
gi|221232939|ref|NC_011916.1|	25721	25740	CC_0025	-	17.79725	16.33617	15.768664
gi|221232939|ref|NC_011916.1|	25741	25760	CC_0025	-	17.259855	15.169301	14.044759
gi|221232939|ref|NC_011916.1|	25761	25780	CC_0025	-	14.730939	12.427158	10.95187
gi|221232939|ref|NC_011916.1|	25781	25800	CC_0025	-	14.825773	12.427158	12.6250725
gi|221232939|ref|NC_011916.1|	25801	25820	CC_0025	-	13.118754	10.793541	11.256088
gi|221232939|ref|NC_011916.1|	25821	25840	CC_0025	-	14.035487	12.077098	11.813823
gi|221232939|ref|NC_011916.1|	25841	25860	CC_0025	-	14.288379	11.318632	11.965932
gi|221232939|ref|NC_011916.1|	25861	25880	CC_0025	-	15.015442	12.543845	12.016635
gi|221232939|ref|NC_011916.1|	25881	25900	CC_0025	-	16.880518	13.769058	13.233509
gi|221232939|ref|NC_011916.1|	25901	25920	CC_0025	-	18.777206	12.427158	14.095462
gi|221232939|ref|NC_011916.1|	25921	25940	CC_0025	-	19.978441	12.660532	15.413743
gi|221232939|ref|NC_011916.1|	25941	25960	CC_0025	-	20.326168	12.310472	16.072884
gi|221232939|ref|NC_011916.1|	25961	25980	CC_0025	-	18.587538	14.352492	15.9207735
gi|221232939|ref|NC_011916.1|	25981	26000	CC_0025	-	19.820383	13.944089	17.137648
gi|221232939|ref|NC_011916.1|	26001	26020	CC_0025	-	18.84043	14.352492	15.109524
gi|221232939|ref|NC_011916.1|	26021	26040	CC_0025	-	19.915218	14.119119	16.224993
gi|221232939|ref|NC_011916.1|	26041	26060	CC_0025	-	18.87204	13.30231	15.058821
gi|221232939|ref|NC_011916.1|	26061	26080	CC_0025	-	18.903652	13.30231	15.717961
gi|221232939|ref|NC_011916.1|	26081	26100	CC_0025	-	20.16811	15.519362	16.934835
gi|221232939|ref|NC_011916.1|	26101	26120	CC_0025	-	20.673893	17.561384	17.898195
gi|221232939|ref|NC_011916.1|	26121	26140	CC_0025	-	21.46418	18.903282	20.94038
gi|221232939|ref|NC_011916.1|	26141	26160	CC_0025	-	22.3493	18.961626	22.106552
gi|221232939|ref|NC_011916.1|	26161	26180	CC_0025	-	22.3493	18.203161	22.714989
gi|221232939|ref|NC_011916.1|	26181	26200	CC_0025	-	21.590626	17.328009	20.534756
gi|221232939|ref|NC_011916.1|	26201	26220	CC_0025	-	20.484224	17.794758	18.050304
gi|221232939|ref|NC_011916.1|	26221	26240	CC_0025	-	21.49579	18.144817	18.709444
gi|221232939|ref|NC_011916.1|	26241	26260	CC_0025	-	21.90674	17.736414	17.847492
gi|221232939|ref|NC_011916.1|	26261	26280	CC_0025	-	22.033186	18.144817	19.165771
gi|221232939|ref|NC_011916.1|	26281	26300	CC_0025	-	22.602192	16.627888	18.202414
gi|221232939|ref|NC_011916.1|	26301	26320	CC_0025	-	20.16811	14.119119	16.579914
gi|221232939|ref|NC_011916.1|	26321	26340	CC_0025	-	19.535881	16.044453	16.985538
gi|221232939|ref|NC_011916.1|	26341	26360	CC_0025	-	17.860474	14.002432	16.072884
gi|221232939|ref|NC_011916.1|	26361	26380	CC_0025	-	17.892084	14.994271	15.667258
gi|221232939|ref|NC_011916.1|	26381	26400	CC_0025	-	18.303034	14.527523	15.9207735
gi|221232939|ref|NC_011916.1|	26401	26420	CC_0025	-	18.777206	14.060776	15.768664
gi|221232939|ref|NC_011916.1|	26421	26440	CC_0025	-	18.65076	15.227645	16.275696
gi|221232939|ref|NC_011916.1|	26441	26460	CC_0025	-	17.923697	15.227645	15.515149
gi|221232939|ref|NC_011916.1|	26461	26480	CC_0025	-	19.72555	15.169301	14.906712
gi|221232939|ref|NC_011916.1|	26481	26500	CC_0025	-	17.860474	14.2358055	13.0814
gi|221232939|ref|NC_011916.1|	26501	26520	CC_0025	-	19.188154	15.811079	15.312337
gi|221232939|ref|NC_011916.1|	26521	26540	CC_0025	-	18.208199	16.102797	13.994056
gi|221232939|ref|NC_011916.1|	26541	26560	CC_0025	-	17.57597	17.8531	14.095462
gi|221232939|ref|NC_011916.1|	26561	26580	CC_0025	-	20.294556	20.653587	15.717961
gi|221232939|ref|NC_011916.1|	26581	26600	CC_0025	-	20.863562	20.245182	16.478508
gi|221232939|ref|NC_011916.1|	26601	26620	CC_0025	-	20.958397	19.895123	16.630617
gi|221232939|ref|NC_011916.1|	26621	26640	CC_0025	-	21.590626	21.937143	16.782726
gi|221232939|ref|NC_011916.1|	26641	26660	CC_0025	-	20.231333	20.245182	15.312337
gi|221232939|ref|NC_011916.1|	26661	26680	null		19.472658	19.136658	13.639134
gi|221232939|ref|NC_011916.1|	26681	26700	null		18.555925	17.094635	12.726479
gi|221232939|ref|NC_011916.1|	26701	26720	CC_0026	-	16.311512	15.461019	11.864526
gi|221232939|ref|NC_011916.1|	26721	26740	CC_0026	-	15.774117	16.044453	12.675776
gi|221232939|ref|NC_011916.1|	26741	26760	CC_0026	-	15.363169	13.068936	12.371556
gi|221232939|ref|NC_011916.1|	26761	26780	CC_0026	-	14.604493	10.560167	11.611011
gi|221232939|ref|NC_011916.1|	26781	26800	CC_0026	-	15.268334	10.26845	11.813823
gi|221232939|ref|NC_011916.1|	26801	26820	CC_0026	-	14.76255	10.4434805	10.292729
gi|221232939|ref|NC_011916.1|	26821	26840	CC_0026	-	14.446436	11.201945	10.901167
gi|221232939|ref|NC_011916.1|	26841	26860	CC_0026	-	15.426392	11.318632	11.408197
gi|221232939|ref|NC_011916.1|	26861	26880	CC_0026	-	14.193544	10.968572	11.712417
gi|221232939|ref|NC_011916.1|	26881	26900	CC_0026	-	15.995398	12.252128	11.76312
gi|221232939|ref|NC_011916.1|	26901	26920	CC_0026	-	15.647672	11.493663	10.799761
gi|221232939|ref|NC_011916.1|	26921	26940	CC_0026	-	16.027008	10.793541	9.684292
gi|221232939|ref|NC_011916.1|	26941	26960	CC_0026	-	18.081753	12.660532	11.154682
gi|221232939|ref|NC_011916.1|	26961	26980	CC_0026	-	17.101799	11.78538	11.560307
gi|221232939|ref|NC_011916.1|	26981	27000	CC_0026	-	16.754072	11.902067	13.132103
gi|221232939|ref|NC_011916.1|	27001	27020	CC_0026	-	16.785685	11.493663	13.334915
gi|221232939|ref|NC_011916.1|	27021	27040	CC_0026	-	15.83734	11.0852585	11.965932
gi|221232939|ref|NC_011916.1|	27041	27060	CC_0026	-	15.141888	11.318632	11.103979
gi|221232939|ref|NC_011916.1|	27061	27080	CC_0026	-	15.426392	12.310472	12.523666
gi|221232939|ref|NC_011916.1|	27081	27100	CC_0026	-	14.794162	12.893906	13.588431
gi|221232939|ref|NC_011916.1|	27101	27120	CC_0026	-	16.406347	13.944089	13.639134
gi|221232939|ref|NC_011916.1|	27121	27140	CC_0026	-	16.627626	14.585867	13.385618
gi|221232939|ref|NC_011916.1|	27141	27160	CC_0026	-	16.722462	15.169301	11.965932
gi|221232939|ref|NC_011916.1|	27161	27180	CC_0026	-	17.006964	15.577705	12.016635
gi|221232939|ref|NC_011916.1|	27181	27200	CC_0026	-	16.785685	14.64421	12.016635
gi|221232939|ref|NC_011916.1|	27201	27220	CC_0026	-	18.966875	15.636049	12.6250725
gi|221232939|ref|NC_011916.1|	27221	27240	CC_0026	-	18.42948	12.893906	12.827885
gi|221232939|ref|NC_011916.1|	27241	27260	CC_0026	-	19.75716	14.2358055	13.841947
gi|221232939|ref|NC_011916.1|	27261	27280	CC_0026	-	21.148066	14.527523	14.703899
gi|221232939|ref|NC_011916.1|	27281	27300	CC_0026	-	19.28299	13.944089	13.334915
gi|221232939|ref|NC_011916.1|	27301	27320	CC_0026	-	19.156544	13.360654	13.284212
gi|221232939|ref|NC_011916.1|	27321	27340	CC_0026	-	15.83734	11.960411	11.560307
gi|221232939|ref|NC_011916.1|	27341	27360	CC_0026	-	15.805729	12.777219	11.864526
gi|221232939|ref|NC_011916.1|	27361	27380	CC_0026	-	15.774117	12.310472	11.357494
gi|221232939|ref|NC_011916.1|	27381	27400	CC_0026	-	14.572882	12.077098	10.596948
gi|221232939|ref|NC_011916.1|	27401	27420	CC_0026	-	16.311512	13.535685	11.915229
gi|221232939|ref|NC_011916.1|	27421	27440	CC_0026	-	16.153454	12.660532	11.712417
gi|221232939|ref|NC_011916.1|	27441	27460	CC_0026	-	16.185066	11.260289	11.4589
gi|221232939|ref|NC_011916.1|	27461	27480	CC_0026	-	17.006964	11.260289	11.611011
gi|221232939|ref|NC_011916.1|	27481	27500	CC_0026	-	17.923697	11.960411	11.560307
gi|221232939|ref|NC_011916.1|	27501	27520	CC_0026	-	17.57597	13.010593	11.611011
gi|221232939|ref|NC_011916.1|	27521	27540	CC_0026	-	17.639193	13.652371	11.915229
gi|221232939|ref|NC_011916.1|	27541	27560	CC_0026	-	18.745594	15.110958	12.168744
gi|221232939|ref|NC_011916.1|	27561	27580	CC_0026	-	18.39787	15.052614	11.712417
gi|221232939|ref|NC_011916.1|	27581	27600	CC_0026	-	16.94374	14.060776	11.256088
gi|221232939|ref|NC_011916.1|	27601	27620	CC_0026	-	16.785685	13.769058	12.219447
gi|221232939|ref|NC_011916.1|	27621	27640	CC_0026	-	14.952219	11.668694	11.408197
gi|221232939|ref|NC_011916.1|	27641	27660	CC_0026	-	15.742506	12.777219	12.777182
gi|221232939|ref|NC_011916.1|	27661	27680	CC_0026	-	16.279902	12.427158	11.712417
gi|221232939|ref|NC_011916.1|	27681	27700	CC_0026	-	16.09023	12.018754	11.002573
gi|221232939|ref|NC_011916.1|	27701	27720	CC_0026	-	17.291468	11.376976	11.408197
gi|221232939|ref|NC_011916.1|	27721	27740	CC_0026	-	15.268334	10.210107	11.053276
gi|221232939|ref|NC_011916.1|	27741	27760	CC_0026	-	16.880518	11.026916	12.067338
gi|221232939|ref|NC_011916.1|	27761	27780	CC_0026	-	14.383213	10.618511	11.103979
gi|221232939|ref|NC_011916.1|	27781	27800	CC_0026	-	15.710895	12.310472	11.965932
gi|221232939|ref|NC_011916.1|	27801	27820	CC_0026	-	16.596016	13.535685	12.168744
gi|221232939|ref|NC_011916.1|	27821	27840	CC_0026	-	17.228245	14.119119	11.813823
gi|221232939|ref|NC_011916.1|	27841	27860	CC_0026	-	16.722462	13.068936	12.523666
gi|221232939|ref|NC_011916.1|	27861	27880	CC_0026	-	15.141888	12.835563	11.813823
gi|221232939|ref|NC_011916.1|	27881	27900	CC_0026	-	14.383213	11.843723	11.154682
gi|221232939|ref|NC_011916.1|	27901	27920	CC_0026	-	15.363169	12.602189	12.067338
gi|221232939|ref|NC_011916.1|	27921	27940	CC_0026	-	16.216679	11.376976	11.864526
gi|221232939|ref|NC_011916.1|	27941	27960	CC_0026	-	16.532793	11.0852585	12.067338
gi|221232939|ref|NC_011916.1|	27961	27980	CC_0026	-	15.521226	9.218267	11.205385
gi|221232939|ref|NC_011916.1|	27981	28000	CC_0026	-	15.868952	9.685016	11.915229
gi|221232939|ref|NC_011916.1|	28001	28020	CC_0026	-	16.880518	12.135441	13.588431
gi|221232939|ref|NC_011916.1|	28021	28040	CC_0026	-	14.76255	11.61035	11.965932
gi|221232939|ref|NC_011916.1|	28041	28060	CC_0026	-	14.193544	11.376976	10.95187
gi|221232939|ref|NC_011916.1|	28061	28080	CC_0026	-	12.107188	8.5181465	8.923746
gi|221232939|ref|NC_011916.1|	28081	28100	CC_0026	-	11.06401	8.109742	8.923746
gi|221232939|ref|NC_011916.1|	28101	28120	CC_0026	-	10.242112	7.4679637	8.213902
gi|221232939|ref|NC_011916.1|	28121	28140	CC_0026	-	10.0524435	7.1179028	7.7575746
gi|221232939|ref|NC_011916.1|	28141	28160	CC_0026	-	9.515049	6.4177814	6.997028
gi|221232939|ref|NC_011916.1|	28161	28180	CC_0026	-	11.253679	8.168085	6.8449187
gi|221232939|ref|NC_011916.1|	28181	28200	CC_0026	-	12.7710285	10.151763	7.554762
gi|221232939|ref|NC_011916.1|	28201	28220	CC_0026	-	13.02392	12.135441	7.6561685
gi|221232939|ref|NC_011916.1|	28221	28240	CC_0026	-	15.679283	12.95225	9.177261
gi|221232939|ref|NC_011916.1|	28241	28260	CC_0026	-	14.4148245	12.660532	9.126558
gi|221232939|ref|NC_011916.1|	28261	28280	CC_0026	-	12.865863	10.910228	8.112496
gi|221232939|ref|NC_011916.1|	28281	28300	CC_0026	-	11.696239	12.018754	7.3519497
gi|221232939|ref|NC_011916.1|	28301	28320	CC_0026	-	12.296857	11.435319	8.416715
gi|221232939|ref|NC_011916.1|	28321	28340	CC_0026	-	13.8458185	12.018754	8.467418
gi|221232939|ref|NC_011916.1|	28341	28360	CC_0026	-	15.141888	11.026916	9.734995
gi|221232939|ref|NC_011916.1|	28361	28380	CC_0026	-	16.785685	11.960411	10.647651
gi|221232939|ref|NC_011916.1|	28381	28400	CC_0026	-	16.785685	12.718876	11.5096035
gi|221232939|ref|NC_011916.1|	28401	28420	CC_0026	-	17.13341	13.477341	11.712417
gi|221232939|ref|NC_011916.1|	28421	28440	CC_0026	-	16.848907	14.410836	12.118041
gi|221232939|ref|NC_011916.1|	28441	28460	CC_0026	-	15.39478	13.010593	10.596948
gi|221232939|ref|NC_011916.1|	28461	28480	CC_0026	-	15.963786	12.95225	10.444839
gi|221232939|ref|NC_011916.1|	28481	28500	CC_0026	-	14.193544	11.61035	9.684292
gi|221232939|ref|NC_011916.1|	28501	28520	CC_0026	-	14.09871	11.78538	8.873043
gi|221232939|ref|NC_011916.1|	28521	28540	CC_0026	-	13.087143	11.435319	8.366012
gi|221232939|ref|NC_011916.1|	28541	28560	CC_0026	-	14.09871	11.960411	10.039214
gi|221232939|ref|NC_011916.1|	28561	28580	CC_0026	-	14.920608	11.843723	10.596948
gi|221232939|ref|NC_011916.1|	28581	28600	CC_0026	-	15.015442	11.960411	10.546245
gi|221232939|ref|NC_011916.1|	28601	28620	CC_0026	-	14.920608	12.543845	10.749058
gi|221232939|ref|NC_011916.1|	28621	28640	CC_0026	-	14.446436	12.718876	10.799761
gi|221232939|ref|NC_011916.1|	28641	28660	CC_0026	-	13.687761	13.5940275	11.408197
gi|221232939|ref|NC_011916.1|	28661	28680	CC_0026	-	13.65615	12.777219	11.560307
gi|221232939|ref|NC_011916.1|	28681	28700	CC_0026	-	13.87743	11.435319	10.596948
gi|221232939|ref|NC_011916.1|	28701	28720	CC_0026	-	16.153454	12.077098	12.219447
gi|221232939|ref|NC_011916.1|	28721	28740	CC_0026	-	15.2051115	10.851885	11.306791
gi|221232939|ref|NC_011916.1|	28741	28760	CC_0026	-	15.742506	11.143602	11.205385
gi|221232939|ref|NC_011916.1|	28761	28780	CC_0026	-	15.2051115	11.668694	11.915229
gi|221232939|ref|NC_011916.1|	28781	28800	CC_0026	-	16.627626	12.077098	12.929291
gi|221232939|ref|NC_011916.1|	28801	28820	CC_0026	-	17.196632	12.193785	13.0814
gi|221232939|ref|NC_011916.1|	28821	28840	CC_0026	-	17.386301	11.201945	12.675776
gi|221232939|ref|NC_011916.1|	28841	28860	CC_0026	-	16.785685	11.026916	11.76312
gi|221232939|ref|NC_011916.1|	28861	28880	CC_0026	-	14.730939	10.385137	11.712417
gi|221232939|ref|NC_011916.1|	28881	28900	CC_0026	-	14.067099	10.501824	11.712417
gi|221232939|ref|NC_011916.1|	28901	28920	CC_0026	-	14.09871	10.26845	12.016635
gi|221232939|ref|NC_011916.1|	28921	28940	CC_0026	-	14.920608	10.4434805	11.965932
gi|221232939|ref|NC_011916.1|	28941	28960	CC_0026	-	16.153454	10.851885	12.6250725
gi|221232939|ref|NC_011916.1|	28961	28980	CC_0026	-	18.23981	13.185623	13.436321
gi|221232939|ref|NC_011916.1|	28981	29000	CC_0026	-	18.777206	14.002432	13.487025
gi|221232939|ref|NC_011916.1|	29001	29020	CC_0026	-	19.409435	15.694392	12.675776
gi|221232939|ref|NC_011916.1|	29021	29040	CC_0026	-	18.745594	16.861261	12.878588
gi|221232939|ref|NC_011916.1|	29041	29060	CC_0026	-	18.84043	16.861261	13.182806
gi|221232939|ref|NC_011916.1|	29061	29080	CC_0026	-	21.084843	18.553223	14.957415
gi|221232939|ref|NC_011916.1|	29081	29100	CC_0026	-	22.222855	18.028131	14.8053055
gi|221232939|ref|NC_011916.1|	29101	29120	CC_0026	-	21.875128	17.50304	14.754602
gi|221232939|ref|NC_011916.1|	29121	29140	CC_0026	-	21.369345	17.152979	15.36304
gi|221232939|ref|NC_011916.1|	29141	29160	CC_0026	-	20.38939	15.052614	13.689837
gi|221232939|ref|NC_011916.1|	29161	29180	CC_0026	-	20.990007	17.444696	14.399681
gi|221232939|ref|NC_011916.1|	29181	29200	CC_0026	-	20.421001	16.102797	12.675776
gi|221232939|ref|NC_011916.1|	29201	29220	CC_0026	-	22.222855	17.8531	12.726479
gi|221232939|ref|NC_011916.1|	29221	29240	CC_0026	-	25.004663	20.595243	14.602493
gi|221232939|ref|NC_011916.1|	29241	29260	CC_0026	-	27.407133	24.095852	16.478508
gi|221232939|ref|NC_011916.1|	29261	29280	CC_0026	-	29.999273	26.954681	19.571398
gi|221232939|ref|NC_011916.1|	29281	29300	CC_0026	-	33.065586	28.588299	22.207958
gi|221232939|ref|NC_011916.1|	29301	29320	CC_0026	-	37.017017	31.97222	25.452957
gi|221232939|ref|NC_011916.1|	29321	29340	CC_0026	-	40.39944	35.18111	28.951471
gi|221232939|ref|NC_011916.1|	29341	29360	CC_0026	-	43.37092	38.740063	33.66686
gi|221232939|ref|NC_011916.1|	29361	29380	CC_0026	-	43.08642	38.798405	34.782326
gi|221232939|ref|NC_011916.1|	29381	29400	CC_0026	-	37.58602	35.589516	32.55139
gi|221232939|ref|NC_011916.1|	29401	29420	CC_0026	-	37.459576	35.414486	38.88928
gi|221232939|ref|NC_011916.1|	29421	29440	null		29.841215	28.238237	35.238655
gi|221232939|ref|NC_011916.1|	29441	29460	null		28.387089	24.737629	37.77381
gi|221232939|ref|NC_011916.1|	29461	29480	null		22.76025	16.802917	31.334517
gi|221232939|ref|NC_011916.1|	29481	29500	null		19.946829	16.102797	30.016235
gi|221232939|ref|NC_011916.1|	29501	29520	CC_0027	-	20.231333	14.585867	27.12616
gi|221232939|ref|NC_011916.1|	29521	29540	CC_0027	-	19.883606	14.935927	26.01069
gi|221232939|ref|NC_011916.1|	29541	29560	CC_0027	-	21.875128	15.694392	21.447412
gi|221232939|ref|NC_011916.1|	29561	29580	CC_0027	-	23.329256	18.494879	20.43335
gi|221232939|ref|NC_011916.1|	29581	29600	CC_0027	-	25.16272	19.311687	19.520695
gi|221232939|ref|NC_011916.1|	29601	29620	CC_0027	-	28.22903	23.2207	20.737568
gi|221232939|ref|NC_011916.1|	29621	29640	CC_0027	-	25.478834	22.637264	19.064365
gi|221232939|ref|NC_011916.1|	29641	29660	CC_0027	-	25.763338	24.679287	18.253117
gi|221232939|ref|NC_011916.1|	29661	29680	CC_0027	-	23.993095	23.162355	17.948898
gi|221232939|ref|NC_011916.1|	29681	29700	CC_0027	-	21.93835	20.245182	14.906712
gi|221232939|ref|NC_011916.1|	29701	29720	CC_0027	-	21.780294	18.728252	16.377102
gi|221232939|ref|NC_011916.1|	29721	29740	CC_0027	-	18.65076	16.219484	13.7405405
gi|221232939|ref|NC_011916.1|	29741	29760	CC_0027	-	16.817295	14.760897	13.182806
gi|221232939|ref|NC_011916.1|	29761	29780	CC_0027	-	17.512747	15.577705	13.132103
gi|221232939|ref|NC_011916.1|	29781	29800	CC_0027	-	18.619148	16.861261	13.7405405
gi|221232939|ref|NC_011916.1|	29801	29820	CC_0027	-	19.599104	18.261505	13.385618
gi|221232939|ref|NC_011916.1|	29821	29840	CC_0027	-	21.116453	17.736414	14.348977
gi|221232939|ref|NC_011916.1|	29841	29860	CC_0027	-	21.527403	17.794758	13.132103
gi|221232939|ref|NC_011916.1|	29861	29880	CC_0027	-	20.737116	16.802917	11.864526
gi|221232939|ref|NC_011916.1|	29881	29900	CC_0027	-	22.475746	18.494879	12.878588
gi|221232939|ref|NC_011916.1|	29901	29920	CC_0027	-	20.104887	16.802917	12.472962
gi|221232939|ref|NC_011916.1|	29921	29940	CC_0027	-	22.222855	18.728252	13.487025
gi|221232939|ref|NC_011916.1|	29941	29960	CC_0027	-	21.274511	17.386353	13.030697
gi|221232939|ref|NC_011916.1|	29961	29980	CC_0027	-	20.57906	17.094635	12.422259
gi|221232939|ref|NC_011916.1|	29981	30000	CC_0027	-	20.642282	16.744576	12.777182
gi|221232939|ref|NC_011916.1|	30001	30020	CC_0027	-	22.633804	15.98611	14.957415
gi|221232939|ref|NC_011916.1|	30021	30040	CC_0027	-	21.811905	15.344332	14.856009
gi|221232939|ref|NC_011916.1|	30041	30060	CC_0027	-	24.056318	17.736414	15.058821
gi|221232939|ref|NC_011916.1|	30061	30080	CC_0027	-	24.404045	18.494879	14.247571
gi|221232939|ref|NC_011916.1|	30081	30100	CC_0027	-	25.384	21.237022	12.929291
gi|221232939|ref|NC_011916.1|	30101	30120	CC_0027	-	29.145763	24.095852	15.160227
gi|221232939|ref|NC_011916.1|	30121	30140	CC_0027	-	30.410223	23.337387	15.160227
gi|221232939|ref|NC_011916.1|	30141	30160	CC_0027	-	31.67468	23.862478	16.83343
gi|221232939|ref|NC_011916.1|	30161	30180	CC_0027	-	30.37861	22.520578	17.999601
gi|221232939|ref|NC_011916.1|	30181	30200	CC_0027	-	29.71477	24.679287	19.165771
gi|221232939|ref|NC_011916.1|	30201	30220	null		29.335432	23.279043	20.129131
gi|221232939|ref|NC_011916.1|	30221	30240	null		26.332344	22.112173	17.746086
gi|221232939|ref|NC_011916.1|	30241	30260	null		22.475746	17.211323	15.008118
gi|221232939|ref|NC_011916.1|	30261	30280	null		22.823473	18.319849	14.247571
gi|221232939|ref|NC_011916.1|	30281	30300	null		20.38939	17.152979	13.588431
gi|221232939|ref|NC_011916.1|	30301	30320	null		21.179676	16.802917	14.095462
gi|221232939|ref|NC_011916.1|	30321	30340	CC_0028	-	18.461092	15.811079	12.777182
gi|221232939|ref|NC_011916.1|	30341	30360	CC_0028	-	18.555925	14.935927	13.182806
gi|221232939|ref|NC_011916.1|	30361	30380	CC_0028	-	19.535881	15.752736	15.008118
gi|221232939|ref|NC_011916.1|	30381	30400	CC_0028	-	21.116453	17.561384	15.515149
gi|221232939|ref|NC_011916.1|	30401	30420	CC_0028	-	20.863562	18.261505	15.21093
gi|221232939|ref|NC_011916.1|	30421	30440	CC_0028	-	19.156544	16.919605	14.095462
gi|221232939|ref|NC_011916.1|	30441	30460	CC_0028	-	20.136497	17.444696	13.537728
gi|221232939|ref|NC_011916.1|	30461	30480	CC_0028	-	19.978441	16.919605	13.385618
gi|221232939|ref|NC_011916.1|	30481	30500	CC_0028	-	19.441046	18.669909	14.146165
gi|221232939|ref|NC_011916.1|	30501	30520	CC_0028	-	18.524315	18.144817	14.348977
gi|221232939|ref|NC_011916.1|	30521	30540	CC_0028	-	18.524315	18.261505	14.044759
gi|221232939|ref|NC_011916.1|	30541	30560	CC_0028	-	18.555925	15.577705	13.284212
gi|221232939|ref|NC_011916.1|	30561	30580	CC_0028	-	19.599104	16.219484	13.943353
gi|221232939|ref|NC_011916.1|	30581	30600	CC_0028	-	18.271423	14.702554	13.588431
gi|221232939|ref|NC_011916.1|	30601	30620	CC_0028	-	20.642282	15.636049	14.856009
gi|221232939|ref|NC_011916.1|	30621	30640	CC_0028	-	20.326168	17.561384	14.044759
gi|221232939|ref|NC_011916.1|	30641	30660	CC_0028	-	21.527403	16.219484	14.095462
gi|221232939|ref|NC_011916.1|	30661	30680	CC_0028	-	22.444136	17.561384	15.464446
gi|221232939|ref|NC_011916.1|	30681	30700	CC_0028	-	21.622236	16.452858	15.008118
gi|221232939|ref|NC_011916.1|	30701	30720	CC_0028	-	21.622236	16.16114	15.667258
gi|221232939|ref|NC_011916.1|	30721	30740	CC_0028	-	21.432568	18.144817	16.732023
gi|221232939|ref|NC_011916.1|	30741	30760	CC_0028	-	20.073275	16.627888	14.754602
gi|221232939|ref|NC_011916.1|	30761	30780	CC_0028	-	20.16811	17.736414	13.841947
gi|221232939|ref|NC_011916.1|	30781	30800	CC_0028	-	21.242899	18.553223	13.841947
gi|221232939|ref|NC_011916.1|	30801	30820	CC_0028	-	20.010052	17.328009	12.371556
gi|221232939|ref|NC_011916.1|	30821	30840	CC_0028	-	21.084843	17.094635	13.385618
gi|221232939|ref|NC_011916.1|	30841	30860	CC_0028	-	20.990007	17.50304	13.639134
gi|221232939|ref|NC_011916.1|	30861	30880	CC_0028	-	20.421001	16.277826	13.841947
gi|221232939|ref|NC_011916.1|	30881	30900	CC_0028	-	21.337734	16.97795	14.602493
gi|221232939|ref|NC_011916.1|	30901	30920	CC_0028	-	19.75716	15.461019	13.030697
gi|221232939|ref|NC_011916.1|	30921	30940	CC_0028	-	18.903652	16.627888	14.095462
gi|221232939|ref|NC_011916.1|	30941	30960	CC_0028	-	18.334646	17.328009	14.501087
gi|221232939|ref|NC_011916.1|	30961	30980	CC_0028	-	16.216679	15.402675	13.537728
gi|221232939|ref|NC_011916.1|	30981	31000	CC_0028	-	18.144976	16.219484	14.703899
gi|221232939|ref|NC_011916.1|	31001	31020	CC_0028	-	16.659239	13.535685	12.929291
gi|221232939|ref|NC_011916.1|	31021	31040	CC_0028	-	17.196632	13.12728	13.689837
gi|221232939|ref|NC_011916.1|	31041	31060	CC_0028	-	16.343124	12.95225	12.929291
gi|221232939|ref|NC_011916.1|	31061	31080	CC_0028	-	15.458003	11.960411	12.472962
gi|221232939|ref|NC_011916.1|	31081	31100	CC_0028	-	17.101799	12.660532	12.979994
gi|221232939|ref|NC_011916.1|	31101	31120	CC_0028	-	14.794162	11.435319	10.850464
gi|221232939|ref|NC_011916.1|	31121	31140	CC_0028	-	15.521226	11.668694	11.256088
gi|221232939|ref|NC_011916.1|	31141	31160	CC_0028	-	15.647672	11.318632	10.394135
gi|221232939|ref|NC_011916.1|	31161	31180	CC_0028	-	14.572882	10.501824	11.306791
gi|221232939|ref|NC_011916.1|	31181	31200	CC_0028	-	15.299946	11.843723	12.016635
gi|221232939|ref|NC_011916.1|	31201	31220	CC_0028	-	14.952219	12.193785	12.168744
gi|221232939|ref|NC_011916.1|	31221	31240	CC_0028	-	15.742506	11.902067	12.929291
gi|221232939|ref|NC_011916.1|	31241	31260	CC_0028	-	15.963786	11.260289	12.016635
gi|221232939|ref|NC_011916.1|	31261	31280	CC_0028	-	16.69085	11.143602	12.777182
gi|221232939|ref|NC_011916.1|	31281	31300	CC_0028	-	17.35469	12.310472	11.965932
gi|221232939|ref|NC_011916.1|	31301	31320	CC_0028	-	16.975353	12.310472	10.95187
gi|221232939|ref|NC_011916.1|	31321	31340	CC_0028	-	17.79725	12.893906	11.205385
gi|221232939|ref|NC_011916.1|	31341	31360	CC_0028	-	16.374735	11.843723	11.306791
gi|221232939|ref|NC_011916.1|	31361	31380	CC_0028	-	16.279902	11.318632	11.5096035
gi|221232939|ref|NC_011916.1|	31381	31400	CC_0028	-	15.521226	12.368814	12.067338
gi|221232939|ref|NC_011916.1|	31401	31420	CC_0028	-	13.403258	11.960411	10.596948
gi|221232939|ref|NC_011916.1|	31421	31440	CC_0028	-	13.529704	12.427158	10.242026
gi|221232939|ref|NC_011916.1|	31441	31460	CC_0028	-	15.078665	11.376976	9.734995
gi|221232939|ref|NC_011916.1|	31461	31480	CC_0028	-	14.256767	10.210107	9.836402
gi|221232939|ref|NC_011916.1|	31481	31500	CC_0028	-	14.636105	10.09342	10.039214
gi|221232939|ref|NC_011916.1|	31501	31520	CC_0028	-	14.952219	9.626672	9.988511
gi|221232939|ref|NC_011916.1|	31521	31540	CC_0028	-	13.687761	8.809863	8.771636
gi|221232939|ref|NC_011916.1|	31541	31560	CC_0028	-	14.383213	8.634833	7.7068715
gi|221232939|ref|NC_011916.1|	31561	31580	CC_0028	-	15.1735	8.109742	7.9603868
gi|221232939|ref|NC_011916.1|	31581	31600	CC_0028	-	16.027008	10.4434805	9.3293705
gi|221232939|ref|NC_011916.1|	31601	31620	CC_0028	-	18.42948	13.068936	12.878588
gi|221232939|ref|NC_011916.1|	31621	31640	CC_0028	-	17.13341	13.418997	12.574369
gi|221232939|ref|NC_011916.1|	31641	31660	CC_0028	-	18.23981	13.243967	13.7405405
gi|221232939|ref|NC_011916.1|	31661	31680	CC_0028	-	17.98692	12.835563	12.6250725
gi|221232939|ref|NC_011916.1|	31681	31700	CC_0028	-	19.72555	13.5940275	14.196868
gi|221232939|ref|NC_011916.1|	31701	31720	CC_0028	-	17.006964	13.360654	12.878588
gi|221232939|ref|NC_011916.1|	31721	31740	CC_0028	-	17.481136	14.294149	13.182806
gi|221232939|ref|NC_011916.1|	31741	31760	CC_0028	-	18.492702	14.935927	13.588431
gi|221232939|ref|NC_011916.1|	31761	31780	CC_0028	-	19.693937	15.344332	13.233509
gi|221232939|ref|NC_011916.1|	31781	31800	CC_0028	-	19.3146	14.935927	13.841947
gi|221232939|ref|NC_011916.1|	31801	31820	CC_0028	-	16.216679	14.002432	12.726479
gi|221232939|ref|NC_011916.1|	31821	31840	CC_0028	-	16.564404	13.360654	13.7405405
gi|221232939|ref|NC_011916.1|	31841	31860	CC_0028	-	15.1735	11.727036	12.523666
gi|221232939|ref|NC_011916.1|	31861	31880	CC_0028	-	17.259855	11.493663	11.915229
gi|221232939|ref|NC_011916.1|	31881	31900	CC_0028	-	14.825773	9.860045	10.749058
gi|221232939|ref|NC_011916.1|	31901	31920	CC_0028	-	15.521226	10.618511	12.219447
gi|221232939|ref|NC_011916.1|	31921	31940	CC_0028	-	16.09023	11.668694	14.602493
gi|221232939|ref|NC_011916.1|	31941	31960	CC_0028	-	18.23981	15.285988	15.565852
gi|221232939|ref|NC_011916.1|	31961	31980	CC_0028	-	18.682371	16.394514	15.413743
gi|221232939|ref|NC_011916.1|	31981	32000	CC_0028	-	18.176588	17.211323	14.653196
gi|221232939|ref|NC_011916.1|	32001	32020	CC_0028	-	18.334646	17.969788	13.639134
gi|221232939|ref|NC_011916.1|	32021	32040	CC_0028	-	16.91213	15.519362	13.487025
gi|221232939|ref|NC_011916.1|	32041	32060	CC_0028	-	16.121843	14.8775835	13.182806
gi|221232939|ref|NC_011916.1|	32061	32080	CC_0028	-	17.639193	14.352492	14.55179
gi|221232939|ref|NC_011916.1|	32081	32100	CC_0028	-	17.038576	14.2358055	13.689837
gi|221232939|ref|NC_011916.1|	32101	32120	CC_0028	-	17.038576	13.418997	13.7405405
gi|221232939|ref|NC_011916.1|	32121	32140	CC_0028	-	15.141888	12.777219	12.523666
gi|221232939|ref|NC_011916.1|	32141	32160	CC_0028	-	15.932175	12.543845	12.979994
gi|221232939|ref|NC_011916.1|	32161	32180	CC_0028	-	16.24829	12.485502	12.929291
gi|221232939|ref|NC_011916.1|	32181	32200	CC_0028	-	15.742506	12.252128	11.611011
gi|221232939|ref|NC_011916.1|	32201	32220	CC_0028	-	17.79725	13.418997	14.348977
gi|221232939|ref|NC_011916.1|	32221	32240	CC_0028	-	17.006964	12.310472	13.436321
gi|221232939|ref|NC_011916.1|	32241	32260	CC_0028	-	17.449524	13.360654	14.095462
gi|221232939|ref|NC_011916.1|	32261	32280	CC_0028	-	16.46957	13.710714	14.146165
gi|221232939|ref|NC_011916.1|	32281	32300	CC_0028	-	17.038576	14.8775835	14.856009
gi|221232939|ref|NC_011916.1|	32301	32320	CC_0028	-	17.828861	15.110958	14.8053055
gi|221232939|ref|NC_011916.1|	32321	32340	CC_0028	-	17.228245	14.585867	14.602493
gi|221232939|ref|NC_011916.1|	32341	32360	CC_0028	-	17.101799	14.585867	13.588431
gi|221232939|ref|NC_011916.1|	32361	32380	CC_0028	-	16.343124	13.769058	12.929291
gi|221232939|ref|NC_011916.1|	32381	32400	CC_0028	-	15.932175	11.318632	12.168744
gi|221232939|ref|NC_011916.1|	32401	32420	CC_0028	-	13.687761	7.876368	10.089917
gi|221232939|ref|NC_011916.1|	32421	32440	CC_0028	-	13.02392	6.651155	8.974449
gi|221232939|ref|NC_011916.1|	32441	32460	CC_0028	-	12.075577	6.5928116	9.025152
gi|221232939|ref|NC_011916.1|	32461	32480	CC_0028	-	10.558227	6.7678423	7.9096837
gi|221232939|ref|NC_011916.1|	32481	32500	CC_0028	-	9.167323	6.8261857	7.605465
gi|221232939|ref|NC_011916.1|	32501	32520	CC_0028	-	8.6931505	6.126064	6.084372
gi|221232939|ref|NC_011916.1|	32521	32540	CC_0028	-	6.9545207	4.5507903	4.563279
gi|221232939|ref|NC_011916.1|	32541	32560	CC_0028	-	6.2590685	3.3839211	3.2957015
gi|221232939|ref|NC_011916.1|	32561	32580	CC_0028	-	6.227457	3.617295	4.106951
gi|221232939|ref|NC_011916.1|	32581	32600	CC_0028	-	6.3222914	3.7923253	4.461873
gi|221232939|ref|NC_011916.1|	32601	32620	CC_0028	-	12.328468	8.401459	11.053276
gi|221232939|ref|NC_011916.1|	32621	32640	CC_0028	-	13.403258	9.101581	12.523666
gi|221232939|ref|NC_011916.1|	32641	32660	CC_0028	-	17.070187	11.960411	16.782726
gi|221232939|ref|NC_011916.1|	32661	32680	CC_0028	-	18.998486	17.211323	21.447412
gi|221232939|ref|NC_011916.1|	32681	32700	CC_0028	-	26.996185	25.321064	29.509205
gi|221232939|ref|NC_011916.1|	32701	32720	CC_0028	-	42.833527	48.541763	45.58209
gi|221232939|ref|NC_011916.1|	32721	32740	CC_0028	-	49.092594	54.959545	51.463646
gi|221232939|ref|NC_011916.1|	32741	32760	CC_0028	-	73.623085	94.2247	74.634964
gi|221232939|ref|NC_011916.1|	32761	32780	CC_0028	-	77.19518	101.10923	83.30519
gi|221232939|ref|NC_011916.1|	32781	32800	CC_0028	-	85.919945	107.23529	94.155655
gi|221232939|ref|NC_011916.1|	32801	32820	CC_0028	-	92.24223	111.319336	97.654175
gi|221232939|ref|NC_011916.1|	32821	32840	CC_0028	-	88.85981	108.0521	91.92472
gi|221232939|ref|NC_011916.1|	32841	32860	CC_0028	-	86.39411	110.61921	85.48543
gi|221232939|ref|NC_011916.1|	32861	32880	CC_0028	-	68.21752	90.957466	69.56465
gi|221232939|ref|NC_011916.1|	32881	32900	CC_0028	-	58.070248	75.20473	62.97325
gi|221232939|ref|NC_011916.1|	32901	32920	CC_0029	+	45.678555	57.585003	51.717163
gi|221232939|ref|NC_011916.1|	32921	32940	CC_0029	+	36.732513	40.840427	43.097637
gi|221232939|ref|NC_011916.1|	32941	32960	CC_0029	+	31.706291	33.605835	37.92592
gi|221232939|ref|NC_011916.1|	32961	32980	CC_0029	+	27.470356	25.962843	33.058422
gi|221232939|ref|NC_011916.1|	32981	33000	CC_0029	+	27.091019	25.962843	32.39928
gi|221232939|ref|NC_011916.1|	33001	33020	CC_0029	+	22.76025	21.470396	29.458502
gi|221232939|ref|NC_011916.1|	33021	33040	CC_0029	+	20.990007	18.961626	27.63319
gi|221232939|ref|NC_011916.1|	33041	33060	CC_0029	+	19.915218	17.50304	25.858582
gi|221232939|ref|NC_011916.1|	33061	33080	CC_0029	+	19.251377	16.97795	23.931864
gi|221232939|ref|NC_011916.1|	33081	33100	CC_0029	+	17.79725	16.627888	18.709444
gi|221232939|ref|NC_011916.1|	33101	33120	CC_0029	+	18.587538	17.561384	18.506632
gi|221232939|ref|NC_011916.1|	33121	33140	CC_0029	+	19.535881	18.028131	19.875616
gi|221232939|ref|NC_011916.1|	33141	33160	CC_0029	+	19.377823	16.627888	19.824913
gi|221232939|ref|NC_011916.1|	33161	33180	CC_0029	+	17.765638	14.702554	18.81085
gi|221232939|ref|NC_011916.1|	33181	33200	CC_0029	+	17.512747	14.585867	17.239054
gi|221232939|ref|NC_011916.1|	33201	33220	CC_0029	+	17.165022	14.702554	15.819367
gi|221232939|ref|NC_011916.1|	33221	33240	CC_0029	+	16.722462	14.585867	15.667258
gi|221232939|ref|NC_011916.1|	33241	33260	CC_0029	+	16.754072	13.827401	16.934835
gi|221232939|ref|NC_011916.1|	33261	33280	CC_0029	+	15.141888	12.193785	16.782726
gi|221232939|ref|NC_011916.1|	33281	33300	CC_0029	+	14.98383	12.427158	17.137648
gi|221232939|ref|NC_011916.1|	33301	33320	CC_0029	+	14.193544	10.676854	15.109524
gi|221232939|ref|NC_011916.1|	33321	33340	CC_0029	+	15.236723	12.543845	14.450384
gi|221232939|ref|NC_011916.1|	33341	33360	CC_0029	+	15.078665	11.318632	12.067338
gi|221232939|ref|NC_011916.1|	33361	33380	CC_0029	+	16.185066	11.260289	12.067338
gi|221232939|ref|NC_011916.1|	33381	33400	CC_0029	+	17.923697	11.493663	13.537728
gi|221232939|ref|NC_011916.1|	33401	33420	CC_0029	+	17.923697	11.960411	14.044759
gi|221232939|ref|NC_011916.1|	33421	33440	CC_0029	+	17.734028	12.018754	12.827885
gi|221232939|ref|NC_011916.1|	33441	33460	CC_0029	+	16.185066	10.851885	14.450384
gi|221232939|ref|NC_011916.1|	33461	33480	CC_0029	+	16.848907	11.668694	15.616555
gi|221232939|ref|NC_011916.1|	33481	33500	CC_0029	+	15.2051115	11.376976	15.160227
gi|221232939|ref|NC_011916.1|	33501	33520	CC_0029	+	13.782596	11.78538	14.754602
gi|221232939|ref|NC_011916.1|	33521	33540	CC_0029	+	14.09871	12.018754	12.777182
gi|221232939|ref|NC_011916.1|	33541	33560	CC_0029	+	13.529704	11.376976	10.647651
gi|221232939|ref|NC_011916.1|	33561	33580	null		12.296857	8.92655	9.126558
gi|221232939|ref|NC_011916.1|	33581	33600	CC_0030	+	11.000787	7.4679637	8.2646055
gi|221232939|ref|NC_011916.1|	33601	33620	CC_0030	+	10.273724	7.351277	8.518121
gi|221232939|ref|NC_011916.1|	33621	33640	CC_0030	+	9.167323	7.2929335	8.923746
gi|221232939|ref|NC_011916.1|	33641	33660	CC_0030	+	10.526615	9.1599245	11.053276
gi|221232939|ref|NC_011916.1|	33661	33680	CC_0030	+	11.506571	9.276611	11.915229
gi|221232939|ref|NC_011916.1|	33681	33700	CC_0030	+	12.676194	9.860045	12.422259
gi|221232939|ref|NC_011916.1|	33701	33720	CC_0030	+	12.707806	8.92655	10.901167
gi|221232939|ref|NC_011916.1|	33721	33740	CC_0030	+	13.118754	10.210107	11.103979
gi|221232939|ref|NC_011916.1|	33741	33760	CC_0030	+	13.624538	9.8017025	11.611011
gi|221232939|ref|NC_011916.1|	33761	33780	CC_0030	+	14.003876	9.976733	12.675776
gi|221232939|ref|NC_011916.1|	33781	33800	CC_0030	+	14.54127	10.09342	14.399681
gi|221232939|ref|NC_011916.1|	33801	33820	CC_0030	+	14.952219	10.968572	15.616555
gi|221232939|ref|NC_011916.1|	33821	33840	CC_0030	+	16.564404	12.018754	15.971477
gi|221232939|ref|NC_011916.1|	33841	33860	CC_0030	+	18.587538	13.535685	16.072884
gi|221232939|ref|NC_011916.1|	33861	33880	CC_0030	+	20.294556	13.30231	17.18835
gi|221232939|ref|NC_011916.1|	33881	33900	CC_0030	+	20.010052	13.885745	17.086945
gi|221232939|ref|NC_011916.1|	33901	33920	CC_0030	+	21.590626	14.760897	18.96296
gi|221232939|ref|NC_011916.1|	33921	33940	CC_0030	+	19.72555	14.8775835	16.02218
gi|221232939|ref|NC_011916.1|	33941	33960	CC_0030	+	18.935263	15.285988	14.856009
gi|221232939|ref|NC_011916.1|	33961	33980	CC_0030	+	18.461092	14.060776	14.095462
gi|221232939|ref|NC_011916.1|	33981	34000	CC_0030	+	16.406347	13.243967	12.726479
gi|221232939|ref|NC_011916.1|	34001	34020	CC_0030	+	16.880518	13.243967	12.675776
gi|221232939|ref|NC_011916.1|	34021	34040	CC_0030	+	16.659239	14.2358055	12.472962
gi|221232939|ref|NC_011916.1|	34041	34060	CC_0030	+	18.87204	14.585867	13.030697
gi|221232939|ref|NC_011916.1|	34061	34080	CC_0030	+	19.251377	14.994271	11.965932
gi|221232939|ref|NC_011916.1|	34081	34100	CC_0030	+	21.622236	17.969788	13.943353
gi|221232939|ref|NC_011916.1|	34101	34120	CC_0030	+	20.294556	17.328009	14.399681
gi|221232939|ref|NC_011916.1|	34121	34140	CC_0030	+	19.788773	16.277826	16.579914
gi|221232939|ref|NC_011916.1|	34141	34160	CC_0030	+	21.717072	16.452858	18.253117
gi|221232939|ref|NC_011916.1|	34161	34180	CC_0030	+	22.222855	17.386353	19.115068
gi|221232939|ref|NC_011916.1|	34181	34200	CC_0030	+	23.42409	20.5369	20.078428
gi|221232939|ref|NC_011916.1|	34201	34220	CC_0030	+	20.231333	18.494879	16.68132
gi|221232939|ref|NC_011916.1|	34221	34240	CC_0030	+	21.05323	20.36187	17.492569
gi|221232939|ref|NC_011916.1|	34241	34260	CC_0030	+	20.357779	18.84494	16.377102
gi|221232939|ref|NC_011916.1|	34261	34280	CC_0030	+	20.863562	17.036293	16.579914
gi|221232939|ref|NC_011916.1|	34281	34300	CC_0030	+	22.380913	17.67807	19.013662
gi|221232939|ref|NC_011916.1|	34301	34320	CC_0030	+	21.148066	17.50304	17.746086
gi|221232939|ref|NC_011916.1|	34321	34340	CC_0030	+	21.68546	18.086475	17.999601
gi|221232939|ref|NC_011916.1|	34341	34360	vapC	-	23.613758	20.011808	20.737568
gi|221232939|ref|NC_011916.1|	34361	34380	vapC	-	24.72016	22.345547	23.52624
gi|221232939|ref|NC_011916.1|	34381	34400	vapC	-	26.363956	21.587082	23.982567
gi|221232939|ref|NC_011916.1|	34401	34420	vapC	-	28.039362	21.8788	23.982567
gi|221232939|ref|NC_011916.1|	34421	34440	vapC	-	25.636892	20.18684	20.686865
gi|221232939|ref|NC_011916.1|	34441	34460	vapC	-	26.553625	20.595243	21.650225
gi|221232939|ref|NC_011916.1|	34461	34480	vapC	-	26.45879	21.937143	22.106552
gi|221232939|ref|NC_011916.1|	34481	34500	vapC	-	24.056318	21.120335	23.627645
gi|221232939|ref|NC_011916.1|	34501	34520	vapC	-	26.616848	20.770273	24.945925
gi|221232939|ref|NC_011916.1|	34521	34540	vapC	-	23.107975	17.50304	21.650225
gi|221232939|ref|NC_011916.1|	34541	34560	vapC	-	25.320778	18.961626	22.41077
gi|221232939|ref|NC_011916.1|	34561	34580	vapC	-	24.751772	20.245182	22.714989
gi|221232939|ref|NC_011916.1|	34581	34600	vapC	-	21.969963	19.370031	20.382647
gi|221232939|ref|NC_011916.1|	34601	34620	vapC	-	22.475746	21.52874	21.700928
gi|221232939|ref|NC_011916.1|	34621	34640	vapC	-	21.969963	19.836779	19.368584
gi|221232939|ref|NC_011916.1|	34641	34660	vapC	-	21.211288	19.01997	17.898195
gi|221232939|ref|NC_011916.1|	34661	34680	vapC	-	23.139587	18.028131	19.6221
gi|221232939|ref|NC_011916.1|	34681	34700	vapC	-	19.72555	15.869423	17.847492
gi|221232939|ref|NC_011916.1|	34701	34720	vapB	-	19.946829	14.819241	17.593975
gi|221232939|ref|NC_011916.1|	34721	34740	vapB	-	19.535881	14.177463	17.036242
gi|221232939|ref|NC_011916.1|	34741	34760	vapB	-	18.271423	14.702554	14.501087
gi|221232939|ref|NC_011916.1|	34761	34780	vapB	-	20.831951	15.694392	16.579914
gi|221232939|ref|NC_011916.1|	34781	34800	vapB	-	19.599104	17.036293	16.732023
gi|221232939|ref|NC_011916.1|	34801	34820	vapB	-	21.211288	19.078314	18.101007
gi|221232939|ref|NC_011916.1|	34821	34840	vapB	-	19.915218	18.728252	17.999601
gi|221232939|ref|NC_011916.1|	34841	34860	vapB	-	21.875128	21.06199	21.193895
gi|221232939|ref|NC_011916.1|	34861	34880	vapB	-	22.665415	20.5369	21.650225
gi|221232939|ref|NC_011916.1|	34881	34900	vapB	-	22.475746	20.18684	23.222021
gi|221232939|ref|NC_011916.1|	34901	34920	vapB	-	23.266033	19.428375	25.098036
gi|221232939|ref|NC_011916.1|	34921	34940	vapB	-	19.630714	16.511202	21.09249
gi|221232939|ref|NC_011916.1|	34941	34960	vapB	-	20.294556	16.802917	20.737568
gi|221232939|ref|NC_011916.1|	34961	34980	null		18.84043	17.386353	18.912256
gi|221232939|ref|NC_011916.1|	34981	35000	null		20.326168	17.8531	18.455929
gi|221232939|ref|NC_011916.1|	35001	35020	null		20.452614	19.195	20.179834
gi|221232939|ref|NC_011916.1|	35021	35040	null		18.050142	15.694392	18.455929
gi|221232939|ref|NC_011916.1|	35041	35060	null		20.16811	18.261505	21.143192
gi|221232939|ref|NC_011916.1|	35061	35080	null		17.828861	14.352492	18.405226
gi|221232939|ref|NC_011916.1|	35081	35100	null		17.734028	13.885745	18.557335
gi|221232939|ref|NC_011916.1|	35101	35120	null		15.742506	12.602189	16.072884
gi|221232939|ref|NC_011916.1|	35121	35140	null		15.363169	11.960411	16.02218
gi|221232939|ref|NC_011916.1|	35141	35160	null		17.228245	13.477341	18.101007
gi|221232939|ref|NC_011916.1|	35161	35180	null		17.765638	14.002432	18.101007
gi|221232939|ref|NC_011916.1|	35181	35200	null		16.975353	14.8775835	18.81085
gi|221232939|ref|NC_011916.1|	35201	35220	null		16.91213	14.294149	17.492569
gi|221232939|ref|NC_011916.1|	35221	35240	null		16.216679	14.002432	16.985538
gi|221232939|ref|NC_011916.1|	35241	35260	null		18.081753	15.694392	18.354523
gi|221232939|ref|NC_011916.1|	35261	35280	null		20.57906	17.561384	21.346006
gi|221232939|ref|NC_011916.1|	35281	35300	null		20.705505	18.144817	20.129131
gi|221232939|ref|NC_011916.1|	35301	35320	null		23.455702	19.486717	22.461473
gi|221232939|ref|NC_011916.1|	35321	35340	null		21.211288	16.744576	17.999601
gi|221232939|ref|NC_011916.1|	35341	35360	null		21.527403	19.311687	19.064365
gi|221232939|ref|NC_011916.1|	35361	35380	null		20.642282	18.436535	17.64468
gi|221232939|ref|NC_011916.1|	35381	35400	null		19.061708	18.669909	16.377102
gi|221232939|ref|NC_011916.1|	35401	35420	null		20.073275	22.345547	16.934835
gi|221232939|ref|NC_011916.1|	35421	35440	null		20.926785	23.920822	17.289757
gi|221232939|ref|NC_011916.1|	35441	35460	null		22.697027	25.146034	17.948898
gi|221232939|ref|NC_011916.1|	35461	35480	null		25.60528	26.837994	19.419287
gi|221232939|ref|NC_011916.1|	35481	35500	null		24.435658	22.40389	19.368584
gi|221232939|ref|NC_011916.1|	35501	35520	null		26.205898	25.08769	22.41077
gi|221232939|ref|NC_011916.1|	35521	35540	null		22.855083	22.112173	21.498116
gi|221232939|ref|NC_011916.1|	35541	35560	null		23.993095	25.26272	23.06991
gi|221232939|ref|NC_011916.1|	35561	35580	null		23.455702	24.270882	21.143192
gi|221232939|ref|NC_011916.1|	35581	35600	null		21.46418	20.595243	18.354523
gi|221232939|ref|NC_011916.1|	35601	35620	null		21.242899	19.078314	19.165771
gi|221232939|ref|NC_011916.1|	35621	35640	null		20.073275	16.452858	17.695383
gi|221232939|ref|NC_011916.1|	35641	35660	null		21.748682	17.152979	19.064365
gi|221232939|ref|NC_011916.1|	35661	35680	null		22.886696	19.01997	20.382647
gi|221232939|ref|NC_011916.1|	35681	35700	null		24.562103	21.237022	23.019207
gi|221232939|ref|NC_011916.1|	35701	35720	null		25.384	21.353708	24.337488
gi|221232939|ref|NC_011916.1|	35721	35740	null		22.949919	19.195	20.991083
gi|221232939|ref|NC_011916.1|	35741	35760	null		23.297644	19.545061	20.737568
gi|221232939|ref|NC_011916.1|	35761	35780	null		24.024708	19.136658	19.419287
gi|221232939|ref|NC_011916.1|	35781	35800	null		22.444136	17.911444	18.15171
gi|221232939|ref|NC_011916.1|	35801	35820	null		25.194332	19.253344	20.382647
gi|221232939|ref|NC_011916.1|	35821	35840	CC_0034	-	22.475746	17.67807	17.695383
gi|221232939|ref|NC_011916.1|	35841	35860	CC_0034	-	24.688549	18.728252	18.15171
gi|221232939|ref|NC_011916.1|	35861	35880	CC_0034	-	21.843517	16.452858	16.326399
gi|221232939|ref|NC_011916.1|	35881	35900	CC_0034	-	23.076365	17.269667	18.506632
gi|221232939|ref|NC_011916.1|	35901	35920	CC_0034	-	22.412523	15.636049	19.6221
gi|221232939|ref|NC_011916.1|	35921	35940	CC_0034	-	23.518925	17.794758	21.244598
gi|221232939|ref|NC_011916.1|	35941	35960	CC_0034	-	24.688549	18.086475	24.134676
gi|221232939|ref|NC_011916.1|	35961	35980	CC_0034	-	24.182764	19.836779	25.300848
gi|221232939|ref|NC_011916.1|	35981	36000	CC_0034	-	26.996185	22.928982	27.227566
gi|221232939|ref|NC_011916.1|	36001	36020	CC_0034	-	26.300732	22.637264	24.591003
gi|221232939|ref|NC_011916.1|	36021	36040	CC_0034	-	27.249077	21.587082	24.286785
gi|221232939|ref|NC_011916.1|	36041	36060	CC_0034	-	26.079453	21.237022	23.627645
gi|221232939|ref|NC_011916.1|	36061	36080	CC_0034	-	25.447224	20.011808	23.120613
gi|221232939|ref|NC_011916.1|	36081	36100	CC_0034	-	27.818083	22.928982	25.199442
gi|221232939|ref|NC_011916.1|	36101	36120	CC_0034	-	24.94144	20.828617	22.664286
gi|221232939|ref|NC_011916.1|	36121	36140	CC_0034	-	24.2776	22.40389	22.9178
gi|221232939|ref|NC_011916.1|	36141	36160	CC_0034	-	24.625326	22.753952	23.120613
gi|221232939|ref|NC_011916.1|	36161	36180	CC_0034	-	25.889784	23.39573	22.360067
gi|221232939|ref|NC_011916.1|	36181	36200	CC_0034	-	25.13111	23.920822	22.714989
gi|221232939|ref|NC_011916.1|	36201	36220	CC_0034	-	23.392479	22.753952	21.041786
gi|221232939|ref|NC_011916.1|	36221	36240	CC_0034	-	23.993095	22.812296	20.484053
gi|221232939|ref|NC_011916.1|	36241	36260	CC_0034	-	23.266033	21.820456	19.571398
gi|221232939|ref|NC_011916.1|	36261	36280	CC_0034	-	23.83504	20.5369	18.912256
gi|221232939|ref|NC_011916.1|	36281	36300	CC_0034	-	26.648458	23.2207	21.650225
gi|221232939|ref|NC_011916.1|	36301	36320	CC_0034	-	26.90135	23.337387	21.143192
gi|221232939|ref|NC_011916.1|	36321	36340	CC_0034	-	28.63998	25.612782	22.309364
gi|221232939|ref|NC_011916.1|	36341	36360	CC_0034	-	31.548235	29.871855	24.5403
gi|221232939|ref|NC_011916.1|	36361	36380	CC_0034	-	27.691637	28.704985	24.337488
gi|221232939|ref|NC_011916.1|	36381	36400	CC_0034	-	28.798038	34.130928	27.328972
gi|221232939|ref|NC_011916.1|	36401	36420	CC_0034	-	25.542057	28.238237	23.272724
gi|221232939|ref|NC_011916.1|	36421	36440	CC_0034	-	25.57367	27.94652	22.9178
gi|221232939|ref|NC_011916.1|	36441	36460	CC_0034	-	21.875128	23.279043	18.253117
gi|221232939|ref|NC_011916.1|	36461	36480	CC_0034	-	21.748682	20.128496	17.239054
gi|221232939|ref|NC_011916.1|	36481	36500	CC_0034	-	21.622236	19.895123	17.492569
gi|221232939|ref|NC_011916.1|	36501	36520	CC_0034	-	20.38939	19.603405	18.557335
gi|221232939|ref|NC_011916.1|	36521	36540	CC_0034	-	23.708593	21.645426	20.534756
gi|221232939|ref|NC_011916.1|	36541	36560	CC_0034	-	25.289165	23.454073	22.765692
gi|221232939|ref|NC_011916.1|	36561	36580	CC_0034	-	25.352388	22.170517	22.613583
gi|221232939|ref|NC_011916.1|	36581	36600	CC_0034	-	23.392479	21.52874	22.005146
gi|221232939|ref|NC_011916.1|	36601	36620	CC_0034	-	22.475746	20.945305	22.461473
gi|221232939|ref|NC_011916.1|	36621	36640	CC_0034	-	21.527403	18.553223	21.09249
gi|221232939|ref|NC_011916.1|	36641	36660	CC_0034	-	22.855083	21.178679	21.498116
gi|221232939|ref|NC_011916.1|	36661	36680	CC_0034	-	21.274511	21.06199	19.46999
gi|221232939|ref|NC_011916.1|	36681	36700	CC_0034	-	22.570581	21.995487	21.853037
gi|221232939|ref|NC_011916.1|	36701	36720	CC_0034	-	23.518925	22.462234	22.765692
gi|221232939|ref|NC_011916.1|	36721	36740	CC_0034	-	23.86665	23.74579	22.613583
gi|221232939|ref|NC_011916.1|	36741	36760	CC_0034	-	26.522013	26.954681	22.968504
gi|221232939|ref|NC_011916.1|	36761	36780	CC_0034	-	23.360867	26.196217	21.954443
gi|221232939|ref|NC_011916.1|	36781	36800	CC_0034	-	23.708593	25.612782	21.700928
gi|221232939|ref|NC_011916.1|	36801	36820	CC_0034	-	20.863562	21.8788	20.991083
gi|221232939|ref|NC_011916.1|	36821	36840	CC_0034	-	19.09332	17.8531	17.79679
gi|221232939|ref|NC_011916.1|	36841	36860	CC_0034	-	16.785685	15.402675	13.994056
gi|221232939|ref|NC_011916.1|	36861	36880	CC_0034	-	17.512747	16.219484	14.501087
gi|221232939|ref|NC_011916.1|	36881	36900	CC_0034	-	18.682371	16.919605	16.782726
gi|221232939|ref|NC_011916.1|	36901	36920	CC_0034	-	18.998486	18.84494	17.391163
gi|221232939|ref|NC_011916.1|	36921	36940	CC_0034	-	19.535881	19.136658	19.520695
gi|221232939|ref|NC_011916.1|	36941	36960	CC_0034	-	20.294556	20.011808	18.760147
gi|221232939|ref|NC_011916.1|	36961	36980	CC_0034	-	21.242899	19.661749	17.746086
gi|221232939|ref|NC_011916.1|	36981	37000	CC_0034	-	20.990007	17.50304	16.934835
gi|221232939|ref|NC_011916.1|	37001	37020	CC_0034	-	21.93835	19.370031	19.115068
gi|221232939|ref|NC_011916.1|	37021	37040	CC_0034	-	21.969963	19.953466	19.875616
gi|221232939|ref|NC_011916.1|	37041	37060	CC_0034	-	21.93835	21.8788	20.43335
gi|221232939|ref|NC_011916.1|	37061	37080	CC_0034	-	22.254467	20.770273	20.534756
gi|221232939|ref|NC_011916.1|	37081	37100	CC_0034	-	21.780294	19.428375	18.81085
gi|221232939|ref|NC_011916.1|	37101	37120	CC_0034	-	23.582148	19.195	19.672804
gi|221232939|ref|NC_011916.1|	37121	37140	CC_0034	-	21.653849	17.269667	18.81085
gi|221232939|ref|NC_011916.1|	37141	37160	CC_0034	-	20.958397	17.269667	18.96296
gi|221232939|ref|NC_011916.1|	37161	37180	CC_0034	-	20.926785	16.919605	19.267178
gi|221232939|ref|NC_011916.1|	37181	37200	CC_0034	-	20.262945	15.519362	20.027725
gi|221232939|ref|NC_011916.1|	37201	37220	CC_0034	-	17.860474	14.2358055	16.83343
gi|221232939|ref|NC_011916.1|	37221	37240	CC_0034	-	19.535881	18.028131	19.92632
gi|221232939|ref|NC_011916.1|	37241	37260	CC_0034	-	17.892084	16.861261	17.441866
gi|221232939|ref|NC_011916.1|	37261	37280	CC_0034	-	21.46418	19.778435	21.498116
gi|221232939|ref|NC_011916.1|	37281	37300	CC_0034	-	20.673893	18.611567	20.585459
gi|221232939|ref|NC_011916.1|	37301	37320	CC_0034	-	20.452614	19.078314	20.991083
gi|221232939|ref|NC_011916.1|	37321	37340	CC_0034	-	20.326168	18.319849	21.193895
gi|221232939|ref|NC_011916.1|	37341	37360	CC_0034	-	18.682371	16.511202	18.709444
gi|221232939|ref|NC_011916.1|	37361	37380	CC_0034	-	16.406347	13.5940275	15.667258
gi|221232939|ref|NC_011916.1|	37381	37400	CC_0034	-	15.83734	12.543845	15.464446
gi|221232939|ref|NC_011916.1|	37401	37420	CC_0034	-	14.383213	12.252128	15.413743
gi|221232939|ref|NC_011916.1|	37421	37440	CC_0034	-	15.110276	12.835563	16.884132
gi|221232939|ref|NC_011916.1|	37441	37460	CC_0034	-	17.196632	15.577705	17.137648
gi|221232939|ref|NC_011916.1|	37461	37480	CC_0034	-	16.817295	16.744576	14.906712
gi|221232939|ref|NC_011916.1|	37481	37500	CC_0034	-	18.65076	20.18684	16.224993
gi|221232939|ref|NC_011916.1|	37501	37520	CC_0034	-	19.251377	20.011808	15.768664
gi|221232939|ref|NC_011916.1|	37521	37540	CC_0034	-	20.294556	18.84494	17.746086
gi|221232939|ref|NC_011916.1|	37541	37560	CC_0034	-	20.990007	17.736414	18.405226
gi|221232939|ref|NC_011916.1|	37561	37580	CC_0034	-	19.662327	15.694392	17.34046
gi|221232939|ref|NC_011916.1|	37581	37600	CC_0034	-	19.946829	16.394514	16.326399
gi|221232939|ref|NC_011916.1|	37601	37620	CC_0034	-	18.777206	14.819241	14.095462
gi|221232939|ref|NC_011916.1|	37621	37640	CC_0034	-	20.768728	16.861261	17.391163
gi|221232939|ref|NC_011916.1|	37641	37660	CC_0034	-	19.599104	18.086475	17.79679
gi|221232939|ref|NC_011916.1|	37661	37680	CC_0034	-	18.777206	16.919605	16.985538
gi|221232939|ref|NC_011916.1|	37681	37700	CC_0034	-	20.57906	17.211323	17.898195
gi|221232939|ref|NC_011916.1|	37701	37720	CC_0034	-	18.903652	16.16114	17.441866
gi|221232939|ref|NC_011916.1|	37721	37740	CC_0034	-	20.547447	17.911444	21.041786
gi|221232939|ref|NC_011916.1|	37741	37760	CC_0034	-	21.400957	18.378191	21.802334
gi|221232939|ref|NC_011916.1|	37761	37780	CC_0034	-	21.969963	21.06199	22.816395
gi|221232939|ref|NC_011916.1|	37781	37800	CC_0034	-	22.286077	18.84494	21.498116
gi|221232939|ref|NC_011916.1|	37801	37820	CC_0034	-	24.08793	21.995487	22.765692
gi|221232939|ref|NC_011916.1|	37821	37840	CC_0034	-	23.139587	19.078314	24.083973
gi|221232939|ref|NC_011916.1|	37841	37860	CC_0034	-	25.099497	21.237022	25.50366
gi|221232939|ref|NC_011916.1|	37861	37880	CC_0034	-	24.056318	20.886961	26.01069
gi|221232939|ref|NC_011916.1|	37881	37900	CC_0034	-	24.593714	20.886961	27.683893
gi|221232939|ref|NC_011916.1|	37901	37920	CC_0034	-	28.60837	25.08769	31.283813
gi|221232939|ref|NC_011916.1|	37921	37940	CC_0034	-	27.628414	24.329226	31.89225
gi|221232939|ref|NC_011916.1|	37941	37960	CC_0034	-	34.203598	30.863693	37.824512
gi|221232939|ref|NC_011916.1|	37961	37980	CC_0034	-	37.143463	34.889393	46.038414
gi|221232939|ref|NC_011916.1|	37981	38000	null		36.89057	33.255775	45.886307
gi|221232939|ref|NC_011916.1|	38001	38020	null		41.126507	33.83921	48.52287
gi|221232939|ref|NC_011916.1|	38021	38040	null		35.910614	30.863693	42.5399
gi|221232939|ref|NC_011916.1|	38041	38060	null		37.96536	33.255775	43.959587
gi|221232939|ref|NC_011916.1|	38061	38080	null		36.416397	34.305958	39.54842
gi|221232939|ref|NC_011916.1|	38081	38100	null		31.643068	28.93836	33.616158
gi|221232939|ref|NC_011916.1|	38101	38120	null		31.4534	27.129711	31.23311
gi|221232939|ref|NC_011916.1|	38121	38140	null		31.769514	25.379408	30.624674
gi|221232939|ref|NC_011916.1|	38141	38160	null		33.85587	29.696825	32.297874
gi|221232939|ref|NC_011916.1|	38161	38180	null		37.5228	31.272099	35.28936
gi|221232939|ref|NC_011916.1|	38181	38200	null		36.258343	31.738846	33.413345
gi|221232939|ref|NC_011916.1|	38201	38220	CC_0035	-	36.416397	32.84737	32.804905
gi|221232939|ref|NC_011916.1|	38221	38240	CC_0035	-	33.16042	32.67234	27.12616
gi|221232939|ref|NC_011916.1|	38241	38260	CC_0035	-	32.212074	32.78903	25.047333
gi|221232939|ref|NC_011916.1|	38261	38280	CC_0035	-	29.841215	33.080746	28.038815
gi|221232939|ref|NC_011916.1|	38281	38300	CC_0035	-	26.522013	29.463451	27.836002
gi|221232939|ref|NC_011916.1|	38301	38320	CC_0035	-	29.05093	28.880016	29.357096
gi|221232939|ref|NC_011916.1|	38321	38340	CC_0035	-	32.52819	29.28842	30.320454
gi|221232939|ref|NC_011916.1|	38341	38360	CC_0035	-	35.15194	35.2978	32.7035
gi|221232939|ref|NC_011916.1|	38361	38380	CC_0035	-	34.614548	36.756382	32.602093
gi|221232939|ref|NC_011916.1|	38381	38400	CC_0035	-	39.26143	43.05748	39.193497
gi|221232939|ref|NC_011916.1|	38401	38420	CC_0035	-	37.30152	40.60705	39.294903
gi|221232939|ref|NC_011916.1|	38421	38440	CC_0035	-	40.020103	46.26637	43.553963
gi|221232939|ref|NC_011916.1|	38441	38460	CC_0035	-	43.276085	52.275745	47.76232
gi|221232939|ref|NC_011916.1|	38461	38480	CC_0035	-	41.600677	54.842857	45.7849
gi|221232939|ref|NC_011916.1|	38481	38500	CC_0036	-	42.138073	58.05175	48.320057
gi|221232939|ref|NC_011916.1|	38501	38520	CC_0036	-	41.47423	60.73555	48.979195
gi|221232939|ref|NC_011916.1|	38521	38540	CC_0036	-	46.310783	69.25369	53.897396
gi|221232939|ref|NC_011916.1|	38541	38560	CC_0036	-	50.51511	73.279396	61.249348
gi|221232939|ref|NC_011916.1|	38561	38580	CC_0036	-	57.817356	84.24796	69.20973
gi|221232939|ref|NC_011916.1|	38581	38600	CC_0036	-	58.35475	84.48134	71.896996
gi|221232939|ref|NC_011916.1|	38601	38620	CC_0036	-	63.57064	95.09985	79.14754
gi|221232939|ref|NC_011916.1|	38621	38640	CC_0036	-	65.119606	99.88402	80.82074
gi|221232939|ref|NC_011916.1|	38641	38660	CC_0036	-	63.15969	107.29363	78.032074
gi|221232939|ref|NC_011916.1|	38661	38680	CC_0036	-	68.53364	115.57841	82.03762
gi|221232939|ref|NC_011916.1|	38681	38700	CC_0036	-	66.257614	103.32628	72.96176
gi|221232939|ref|NC_011916.1|	38701	38720	CC_0036	-	70.55677	110.26915	77.72785
gi|221232939|ref|NC_011916.1|	38721	38740	CC_0036	-	66.7634	101.45929	72.55614
gi|221232939|ref|NC_011916.1|	38741	38760	CC_0036	-	57.50124	87.1068	61.198643
gi|221232939|ref|NC_011916.1|	38761	38780	CC_0036	-	46.40562	67.56174	47.711617
gi|221232939|ref|NC_011916.1|	38781	38800	CC_0036	-	38.945316	50.99219	37.216076
gi|221232939|ref|NC_011916.1|	38801	38820	CC_0036	-	35.468056	42.182327	30.87819
gi|221232939|ref|NC_011916.1|	38821	38840	CC_0036	-	28.387089	30.63032	23.222021
gi|221232939|ref|NC_011916.1|	38841	38860	CC_0036	-	26.269121	25.379408	20.230537
gi|221232939|ref|NC_011916.1|	38861	38880	CC_0036	-	23.044752	19.895123	17.239054
gi|221232939|ref|NC_011916.1|	38881	38900	CC_0036	-	21.02162	17.036293	14.247571
gi|221232939|ref|NC_011916.1|	38901	38920	CC_0036	-	20.57906	17.619726	14.298274
gi|221232939|ref|NC_011916.1|	38921	38940	CC_0036	-	18.42948	16.33617	14.856009
gi|221232939|ref|NC_011916.1|	38941	38960	CC_0036	-	18.808817	17.561384	15.667258
gi|221232939|ref|NC_011916.1|	38961	38980	CC_0036	-	20.357779	17.444696	15.819367
gi|221232939|ref|NC_011916.1|	38981	39000	CC_0036	-	19.599104	17.386353	15.667258
gi|221232939|ref|NC_011916.1|	39001	39020	CC_0036	-	21.084843	17.8531	15.464446
gi|221232939|ref|NC_011916.1|	39021	39040	CC_0036	-	20.547447	17.211323	15.058821
gi|221232939|ref|NC_011916.1|	39041	39060	CC_0036	-	21.05323	18.261505	15.667258
gi|221232939|ref|NC_011916.1|	39061	39080	CC_0036	-	22.12802	18.553223	16.224993
gi|221232939|ref|NC_011916.1|	39081	39100	CC_0036	-	22.412523	18.786596	16.732023
gi|221232939|ref|NC_011916.1|	39101	39120	CC_0036	-	22.886696	19.836779	18.30382
gi|221232939|ref|NC_011916.1|	39121	39140	CC_0036	-	20.990007	19.486717	17.543272
gi|221232939|ref|NC_011916.1|	39141	39160	CC_0036	-	20.831951	21.587082	17.746086
gi|221232939|ref|NC_011916.1|	39161	39180	CC_0036	-	20.737116	20.36187	15.515149
gi|221232939|ref|NC_011916.1|	39181	39200	CC_0036	-	21.337734	19.428375	14.298274
gi|221232939|ref|NC_011916.1|	39201	39220	CC_0036	-	21.93835	17.561384	15.312337
gi|221232939|ref|NC_011916.1|	39221	39240	CC_0036	-	22.633804	18.203161	16.732023
gi|221232939|ref|NC_011916.1|	39241	39260	CC_0036	-	23.107975	18.028131	17.391163
gi|221232939|ref|NC_011916.1|	39261	39280	CC_0036	-	22.823473	18.494879	18.202414
gi|221232939|ref|NC_011916.1|	39281	39300	CC_0036	-	22.697027	19.953466	18.658741
gi|221232939|ref|NC_011916.1|	39301	39320	CC_0036	-	22.76025	20.478558	17.593975
gi|221232939|ref|NC_011916.1|	39321	39340	CC_0036	-	22.286077	21.820456	18.15171
gi|221232939|ref|NC_011916.1|	39341	39360	CC_0036	-	20.768728	19.370031	15.819367
gi|221232939|ref|NC_011916.1|	39361	39380	CC_0036	-	21.559013	19.01997	16.68132
gi|221232939|ref|NC_011916.1|	39381	39400	CC_0036	-	20.895174	15.927766	15.21093
gi|221232939|ref|NC_011916.1|	39401	39420	CC_0036	-	21.653849	16.33617	15.667258
gi|221232939|ref|NC_011916.1|	39421	39440	CC_0036	-	22.697027	17.328009	15.616555
gi|221232939|ref|NC_011916.1|	39441	39460	CC_0037	-	24.404045	20.245182	17.441866
gi|221232939|ref|NC_011916.1|	39461	39480	CC_0037	-	22.918306	19.428375	16.478508
gi|221232939|ref|NC_011916.1|	39481	39500	CC_0037	-	23.297644	18.961626	17.999601
gi|221232939|ref|NC_011916.1|	39501	39520	CC_0037	-	23.171198	19.370031	18.050304
gi|221232939|ref|NC_011916.1|	39521	39540	CC_0037	-	23.23442	18.786596	16.224993
gi|221232939|ref|NC_011916.1|	39541	39560	CC_0037	-	22.633804	19.01997	16.782726
gi|221232939|ref|NC_011916.1|	39561	39580	CC_0037	-	20.958397	18.84494	16.68132
gi|221232939|ref|NC_011916.1|	39581	39600	CC_0037	-	20.262945	16.219484	18.15171
gi|221232939|ref|NC_011916.1|	39601	39620	CC_0037	-	20.831951	15.577705	18.506632
gi|221232939|ref|NC_011916.1|	39621	39640	CC_0037	-	21.875128	17.386353	18.608038
gi|221232939|ref|NC_011916.1|	39641	39660	CC_0037	-	21.748682	16.744576	17.036242
gi|221232939|ref|NC_011916.1|	39661	39680	CC_0037	-	23.139587	16.919605	16.377102
gi|221232939|ref|NC_011916.1|	39681	39700	CC_0037	-	25.257555	17.736414	17.18835
gi|221232939|ref|NC_011916.1|	39701	39720	CC_0037	-	21.969963	17.50304	15.413743
gi|221232939|ref|NC_011916.1|	39721	39740	CC_0037	-	23.23442	18.261505	16.83343
gi|221232939|ref|NC_011916.1|	39741	39760	CC_0037	-	24.53049	19.01997	18.405226
gi|221232939|ref|NC_011916.1|	39761	39780	CC_0037	-	25.194332	20.36187	18.506632
gi|221232939|ref|NC_011916.1|	39781	39800	CC_0037	-	27.533579	23.629105	21.650225
gi|221232939|ref|NC_011916.1|	39801	39820	CC_0037	-	27.059408	25.787811	22.461473
gi|221232939|ref|NC_011916.1|	39821	39840	CC_0037	-	27.122631	27.59646	23.830458
gi|221232939|ref|NC_011916.1|	39841	39860	CC_0037	-	29.999273	28.471611	25.807878
gi|221232939|ref|NC_011916.1|	39861	39880	CC_0037	-	31.200508	29.755167	25.047333
gi|221232939|ref|NC_011916.1|	39881	39900	null		33.88748	30.280258	28.799362
gi|221232939|ref|NC_011916.1|	39901	39920	null		30.78956	27.07137	27.63319
gi|221232939|ref|NC_011916.1|	39921	39940	null		28.798038	24.38757	25.250145
gi|221232939|ref|NC_011916.1|	39941	39960	null		24.94144	21.587082	23.830458
gi|221232939|ref|NC_011916.1|	39961	39980	CC_0038	-	22.918306	17.036293	20.43335
[truncated: 200,148+ more rows]

## Sheet: G1 gene
Chromosome	Start	End	Feature	Strand	WT (AIYT-161)	∆citA (AIYT-162)	xylX::relA'-FLAG (AIYT-163)
gi|221232939|ref|NC_011916,1|	68862	69262	CC_0067	-	125.624	111.144	110.736
gi|221232939|ref|NC_011916,1|	84772	85172	CC_0083	-	176.265	177.422	229.989
gi|221232939|ref|NC_011916,1|	96090	96490	CC_0088	-	566.414	834.603	646.515
gi|221232939|ref|NC_011916,1|	106030	106430	CC_0095	-	125.371	203.735	180.655
gi|221232939|ref|NC_011916,1|	178870	179270	CC_0167	-	162.356	197.609	330.939
gi|221232939|ref|NC_011916,1|	212187	212587	CC_0199	+	149.712	155.427	150.03
gi|221232939|ref|NC_011916,1|	370245	370645	CC_0349	+	431.496	607.706	670.092
gi|221232939|ref|NC_011916,1|	514098	514498	CC_0465	+	187.235	194.167	241.296
gi|221232939|ref|NC_011916,1|	561464	561864	CC_0508	-	129.607	179.114	154.391
gi|221232939|ref|NC_011916,1|	691972	692372	CC_0604	-	127.963	109.511	155.101
gi|221232939|ref|NC_011916,1|	783596	783996	CC_0692	+	137.036	150.409	141.31
gi|221232939|ref|NC_011916,1|	841638	842038	cpdR	+	172.409	184.074	300.619
gi|221232939|ref|NC_011916,1|	899462	899862	CC_0792	+	91.7048	173.222	208.339
gi|221232939|ref|NC_011916,1|	901991	902391	CC_0794	+	98.122	85.5899	181.619
gi|221232939|ref|NC_011916,1|	938655	939055	CC_0817	-	223.114	416.514	288.196
gi|221232939|ref|NC_011916,1|	953724	954124	CC_0832	-	121.325	139.383	165.85
gi|221232939|ref|NC_011916,1|	966756	967156	CC_0845	+	124.96	208.169	107.998
gi|221232939|ref|NC_011916,1|	1026239	1026639	sciP	+	126.351	197.143	280.692
gi|221232939|ref|NC_011916,1|	1223522	1223922	CC_1066	+	116.646	187.691	160.222
gi|221232939|ref|NC_011916,1|	1244735	1245135	CC_1086	-	113.548	126.139	181.01
gi|221232939|ref|NC_011916,1|	1304505	1304905	CC_1128	+	119.839	258.053	308.376
gi|221232939|ref|NC_011916,1|	1404771	1405171	CC_1220	-	133.021	200.818	218.936
gi|221232939|ref|NC_011916,1|	1481514	1481914	perP	-	109.913	188.566	226.541
gi|221232939|ref|NC_011916,1|	1538381	1538781	ribH	+	140.734	157.819	210.469
gi|221232939|ref|NC_011916,1|	1572406	1572806	CC_1399	+	129.196	183.257	203.066
gi|221232939|ref|NC_011916,1|	1639177	1639577	flaY	+	226.464	400.411	352.032
gi|221232939|ref|NC_011916,1|	1896056	1896456	CC_1697	-	149.206	219.196	146.785
gi|221232939|ref|NC_011916,1|	1906682	1907082	CC_1707	-	95.5298	113.711	149.878
gi|221232939|ref|NC_011916,1|	1923289	1923689	CC_1725	+	133.685	158.636	187.094
gi|221232939|ref|NC_011916,1|	2072420	2072820	CC_1850	+	119.839	175.672	223.956
gi|221232939|ref|NC_011916,1|	2096769	2097169	CC_1876	-	301.447	439.093	415.106
gi|221232939|ref|NC_011916,1|	2184928	2185328	CC_1982	+	251.279	373.048	354.567
gi|221232939|ref|NC_011916,1|	2186652	2187052	clpX	-	160.207	185.824	172.695
gi|221232939|ref|NC_011916,1|	2210238	2210638	clpP	-	94.2338	212.954	148.205
gi|221232939|ref|NC_011916,1|	2253188	2253588	CC_2026	-	119.713	174.272	190.745
gi|221232939|ref|NC_011916,1|	2396014	2396414	panC	+	113.58	125.147	132.538
gi|221232939|ref|NC_011916,1|	2432648	2433048	CC_2199	+	83.1381	87.8653	96.7415
gi|221232939|ref|NC_011916,1|	2482481	2482881	CC_2259	-	249.92	336.35	384.025
gi|221232939|ref|NC_011916,1|	2551818	2552218	CC_2324	+	203.167	332.441	241.043
gi|221232939|ref|NC_011916,1|	2647823	2648223	CC_2416	+	116.551	155.952	163.416
gi|221232939|ref|NC_011916,1|	2656449	2656849	hfsE	+	182.777	161.611	259.549
gi|221232939|ref|NC_011916,1|	2672180	2672580	CC_2441	+	66.3208	67.5617	123.361
gi|221232939|ref|NC_011916,1|	2680945	2681345	CC_2450	-	173.073	280.865	347.063
gi|221232939|ref|NC_011916,1|	2885454	2885854	CC_2639	-	90.0927	144.108	154.543
gi|221232939|ref|NC_011916,1|	3082373	3082773	CC_2831	-	102.295	128.764	103.434
gi|221232939|ref|NC_011916,1|	3091657	3092057	CC_2839	-	133.495	458.638	312.635
gi|221232939|ref|NC_011916,1|	3118451	3118851	CC_2868	-	129.67	145.742	238.305
gi|221232939|ref|NC_011916,1|	3131722	3132122	CC_2882	-	105.013	108.519	134.211
gi|221232939|ref|NC_011916,1|	3198502	3198902	pilA	-	161.946	271.997	268.524
gi|221232939|ref|NC_011916,1|	3267875	3268275	CC_3025	+	139.28	232.79	270.602
gi|221232939|ref|NC_011916,1|	3283947	3284347	fliJ	+	117.721	118.204	123.107
gi|221232939|ref|NC_011916,1|	3353473	3353873	CC_3094	-	107.7	111.844	336.719
gi|221232939|ref|NC_011916,1|	3358391	3358791	CC_3100	-	185.686	215.929	226.187
gi|221232939|ref|NC_011916,1|	3361434	3361834	CC_3102	-	180.154	209.92	199.77
gi|221232939|ref|NC_011916,1|	3578369	3578769	CC_3301	-	120.25	123.221	165.292
gi|221232939|ref|NC_011916,1|	3590054	3590454	CC_3315	+	95.9092	87.0485	105.564
gi|221232939|ref|NC_011916,1|	3666213	3666613	CC_3396	-	282.764	340.142	401.366
gi|221232939|ref|NC_011916,1|	3740556	3740956	CC_3471	+	234.557	264.529	268.625
gi|221232939|ref|NC_011916,1|	3759989	3760389	CC_3491	-	174.653	275.615	239.471
gi|221232939|ref|NC_011916,1|	3857642	3858042	CC_3576	-	155.275	175.03	190.897
gi|221232939|ref|NC_011916,1|	3968558	3968958	CC_3689	+	167.383	171.938	207.528

## Sheet: S gene
Chromosome	Start	End	Feature	Strand	WT (AIYT-161)	∆citA (AIYT-162)	xylX::relA'-FLAG (AIYT-163)
gi|221232939|ref|NC_011916,1|	247882	248282	CC_0233	+	147.72	157.177	159.613
gi|221232939|ref|NC_011916,1|	371123	371523	CC_0350	+	194.758	199.593	256.608
gi|221232939|ref|NC_011916,1|	399513	399913	ccrM	-	110.735	98.1337	181.162
gi|221232939|ref|NC_011916,1|	445063	445463	CC_0429	-	166.877	207.878	314.055
gi|221232939|ref|NC_011916,1|	445297	445697	CC_0430	+	143.737	166.396	274.202
gi|221232939|ref|NC_011916,1|	851220	851620	motA	-	164.506	172.638	206.21
gi|221232939|ref|NC_011916,1|	1026541	1026941	CC_0904	+	175.444	277.773	319.125
gi|221232939|ref|NC_011916,1|	1084881	1085281	fliO	-	116.71	111.844	145.467
gi|221232939|ref|NC_011916,1|	1193127	1193527	CC_1035	+	89.1127	80.0472	98.7696
gi|221232939|ref|NC_011916,1|	1233304	1233704	fliQ	+	150.091	151.81	146.177
gi|221232939|ref|NC_011916,1|	1406698	1407098	CC_1222	-	118.195	141.891	179.286
gi|221232939|ref|NC_011916,1|	1634066	1634466	flbT	+	168.9	218.496	343.108
gi|221232939|ref|NC_011916,1|	1765352	1765752	CC_1573	-	94.9292	94.4581	146.126
gi|221232939|ref|NC_011916,1|	1793374	1793774	CC_1599	+	95.1505	105.368	116.313
gi|221232939|ref|NC_011916,1|	1856073	1856473	CC_1655	-	133.337	131.331	147.343
gi|221232939|ref|NC_011916,1|	2132001	2132401	CC_1908	-	117.658	147.317	184.661
gi|221232939|ref|NC_011916,1|	2226681	2227081	CC_1996	-	147.847	175.147	165.292
gi|221232939|ref|NC_011916,1|	2278996	2279396	podJ	-	195.074	236.583	298.236
gi|221232939|ref|NC_011916,1|	2300345	2300745	fliL	-	106.436	116.629	157.889
gi|221232939|ref|NC_011916,1|	2473763	2474163	CC_2249	+	144.939	156.652	173.202
gi|221232939|ref|NC_011916,1|	2504881	2505281	CC_2281	-	111.272	110.969	133.552
gi|221232939|ref|NC_011916,1|	2546086	2546486	CC_2317	-	91.6732	105.893	106.527
gi|221232939|ref|NC_011916,1|	2665794	2666194	CC_2433	-	101.662	113.945	168.385
gi|221232939|ref|NC_011916,1|	2696118	2696518	divK	-	115.824	116.92	162.402
gi|221232939|ref|NC_011916,1|	2775541	2775941	ftsQ	-	156.698	197.843	221.725
gi|221232939|ref|NC_011916,1|	2818330	2818730	fliX	-	101.473	104.143	125.338
gi|221232939|ref|NC_011916,1|	2870219	2870619	hfaA	+	168.552	213.712	178.678
gi|221232939|ref|NC_011916,1|	3006548	3006948	CC_2764	-	130.524	127.014	192.722
gi|221232939|ref|NC_011916,1|	3056006	3056406	CC_2810	-	92.8428	88.8571	222.08
gi|221232939|ref|NC_011916,1|	3097004	3097404	CC_2842	-	98.0271	100.759	151.247
gi|221232939|ref|NC_011916,1|	3187809	3188209	CC_2938	+	95.2137	92.066	95.0683
gi|221232939|ref|NC_011916,1|	3197446	3197846	cpaB	-	132.42	146.092	173.151
gi|221232939|ref|NC_011916,1|	3198819	3199219	CC_2949	+	126.256	143.233	221.167
gi|221232939|ref|NC_011916,1|	3279447	3279847	ctrA	-	326.736	377.074	612.696
gi|221232939|ref|NC_011916,1|	3282610	3283010	fliI	+	102.611	89.0321	93.8007
gi|221232939|ref|NC_011916,1|	3438143	3438543	dgrB	-	117.626	124.68	118.341
gi|221232939|ref|NC_011916,1|	3438197	3438597	CC_3167	+	108.585	109.336	106.679
gi|221232939|ref|NC_011916,1|	3566229	3566629	CC_3286	+	174.464	191.075	286.878
gi|221232939|ref|NC_011916,1|	3786590	3786990	CC_3515	-	142.915	133.723	315.982
gi|221232939|ref|NC_011916,1|	3879638	3880038	rpoN	-	241.259	198.076	251.132
gi|221232939|ref|NC_011916,1|	3924188	3924588	CC_3639	-	203.673	195.684	212.547
gi|221232939|ref|NC_011916,1|	3983668	3984068	ftsK	+	130.587	132.323	135.834
