# Supplementary figures and images for: Bacterial cell cycle control by citrate synthase independent of enzymatic activity
Source: eLife journal article supplement (doi:10.7554/elife.52272), 2020-03-09

A

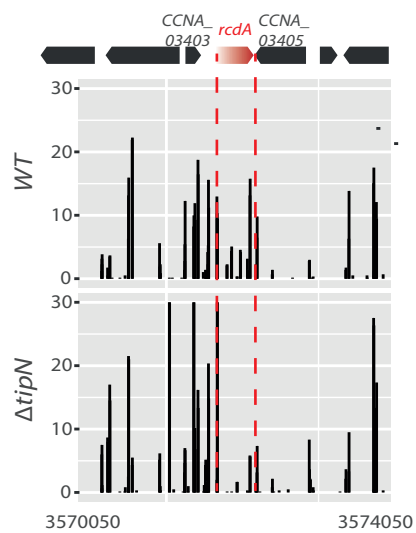

B

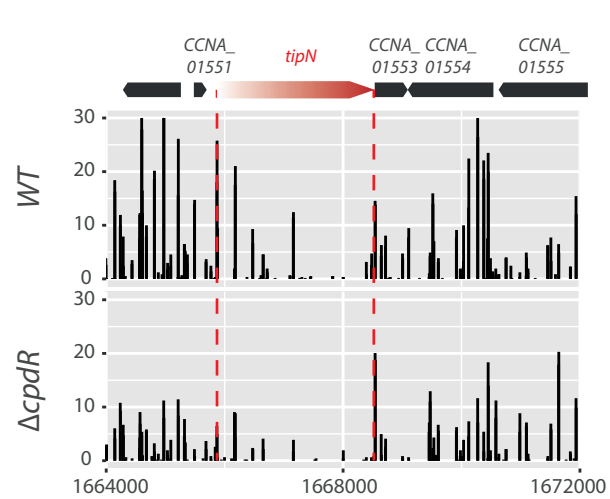

C

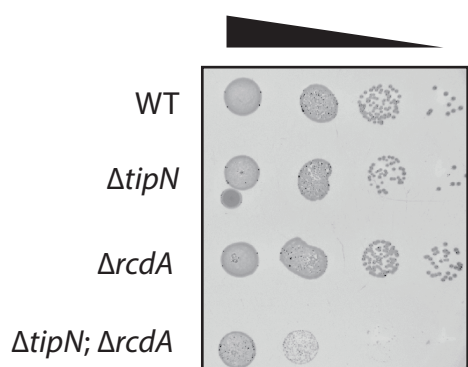

D

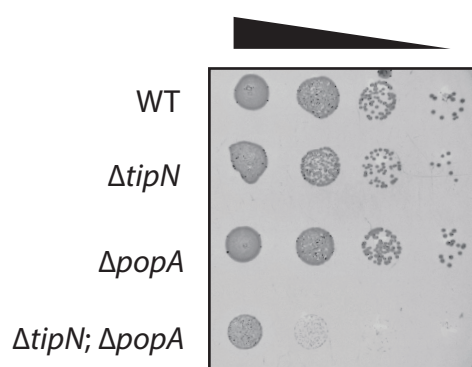

E

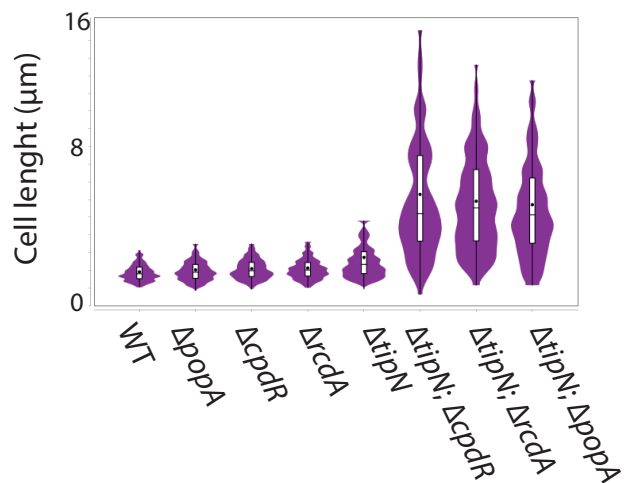

F

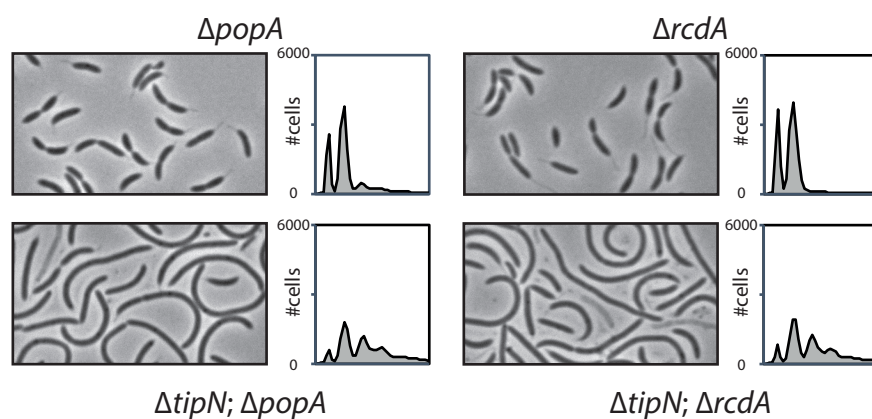

Figure 1 Supplement 1

Supplement: supp [file elife-52272-supp-v1.zip]

A

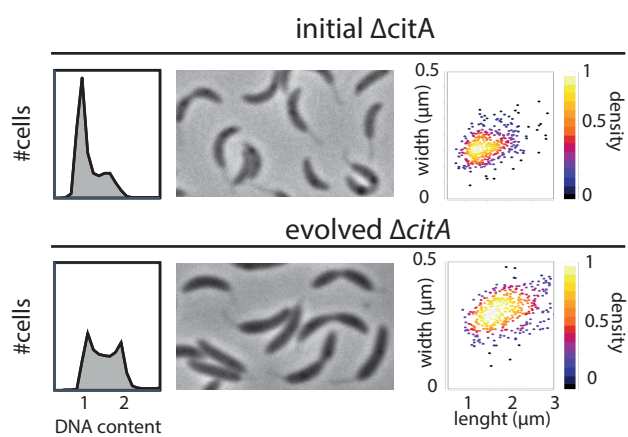

B

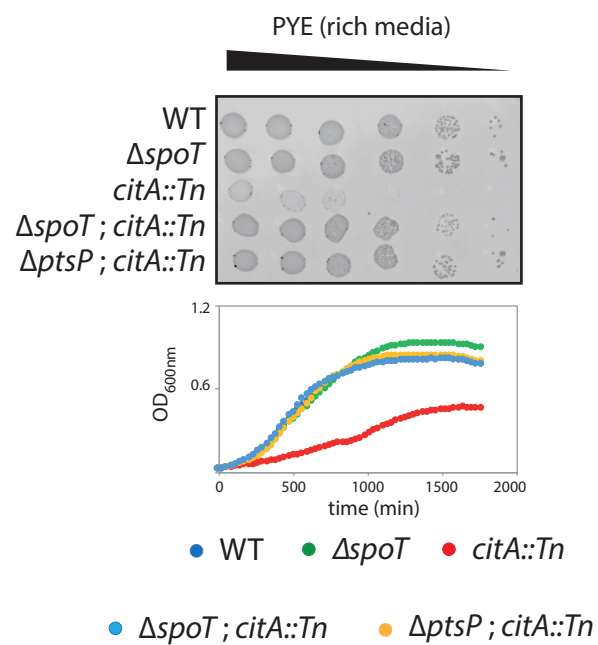

Figure 6 Supplement 1

Supplement: supp [file elife-52272-supp-v1.zip]

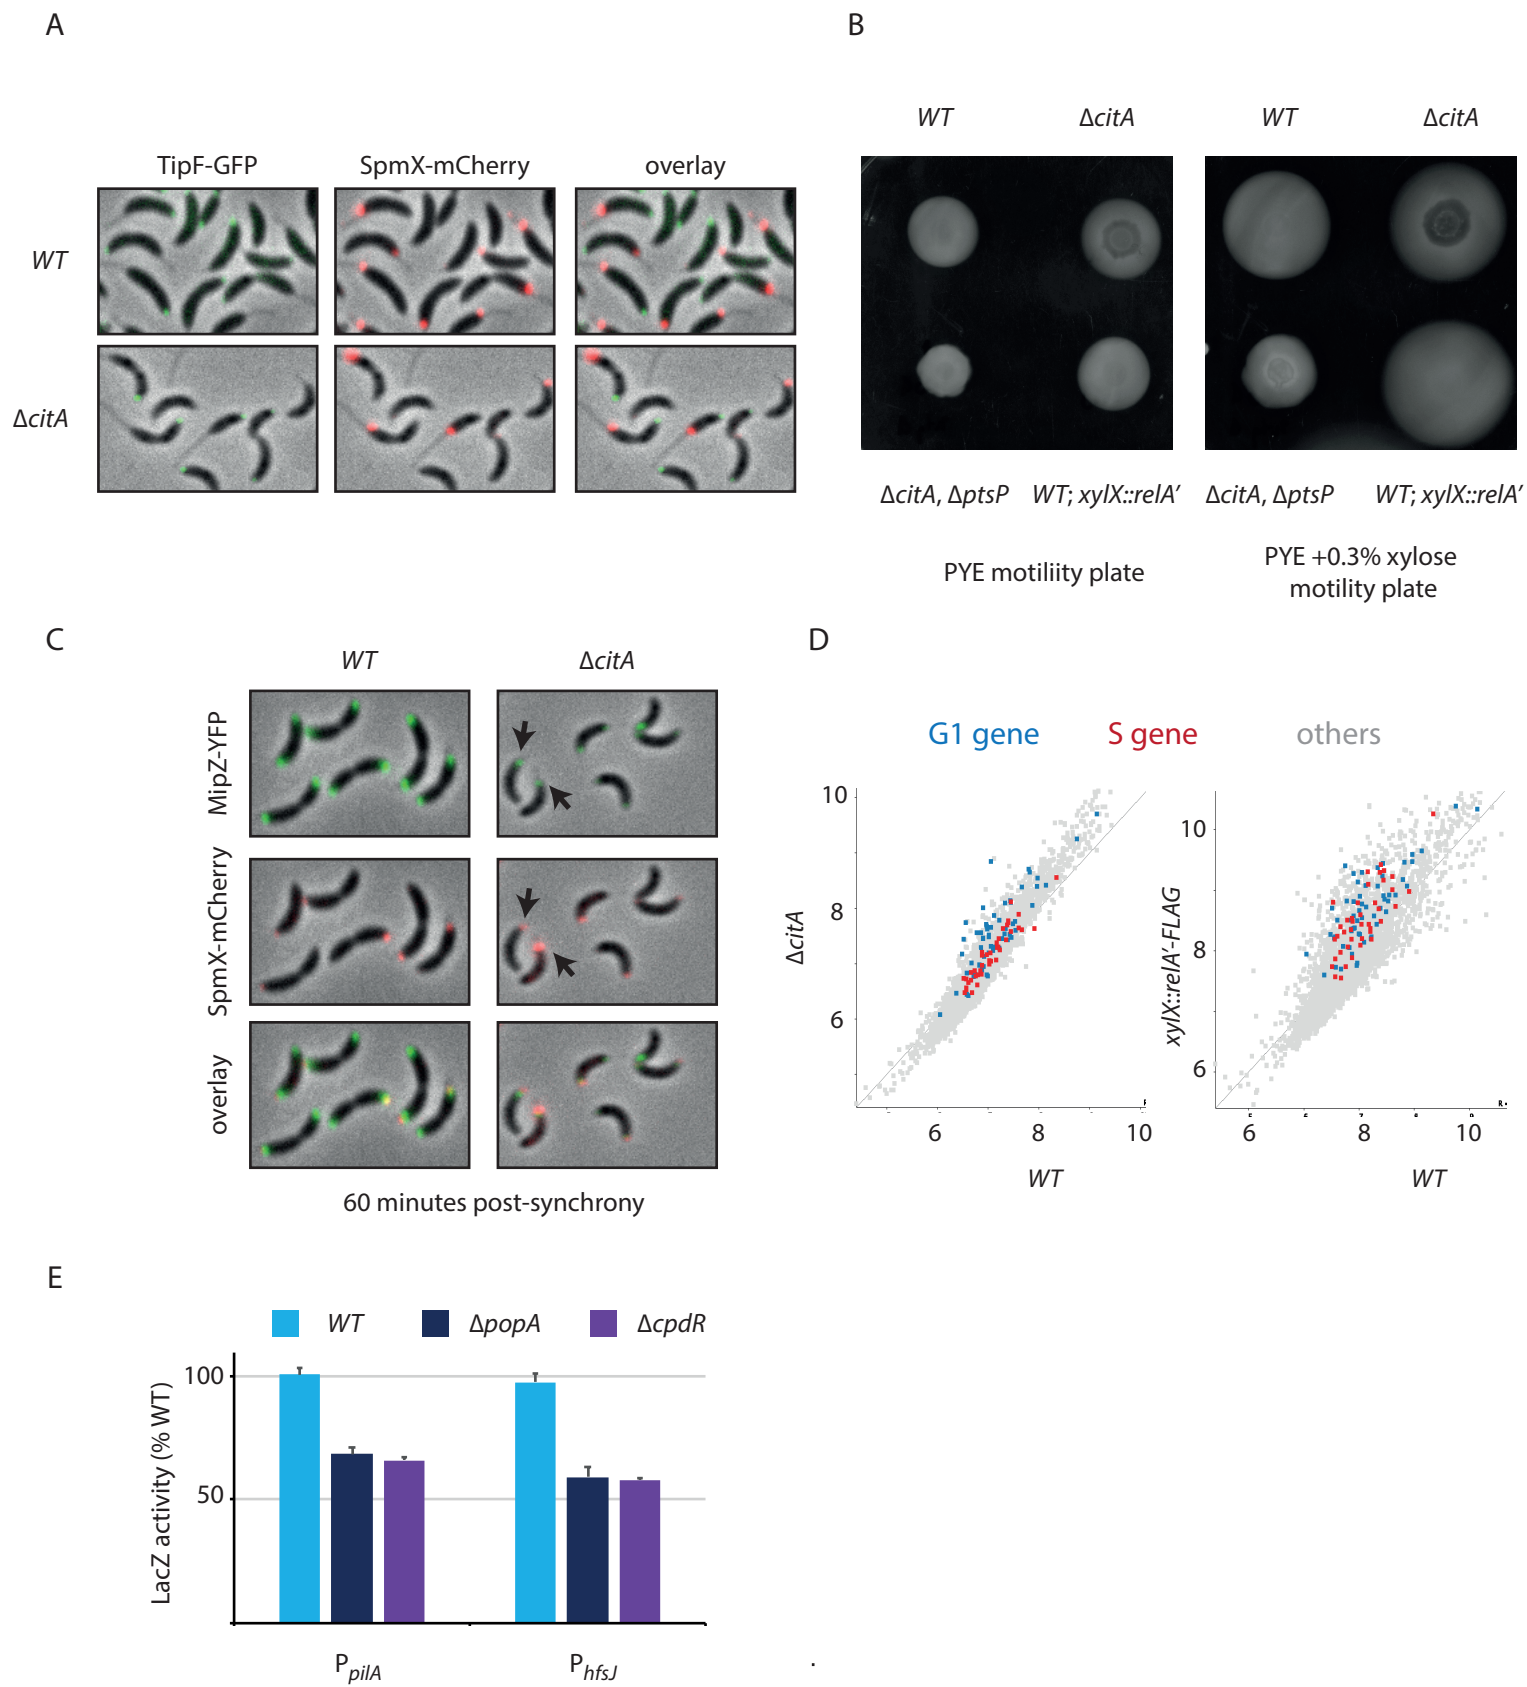

Figure 5 Supplement 1

Supplement: supp [file elife-52272-supp-v1.zip]

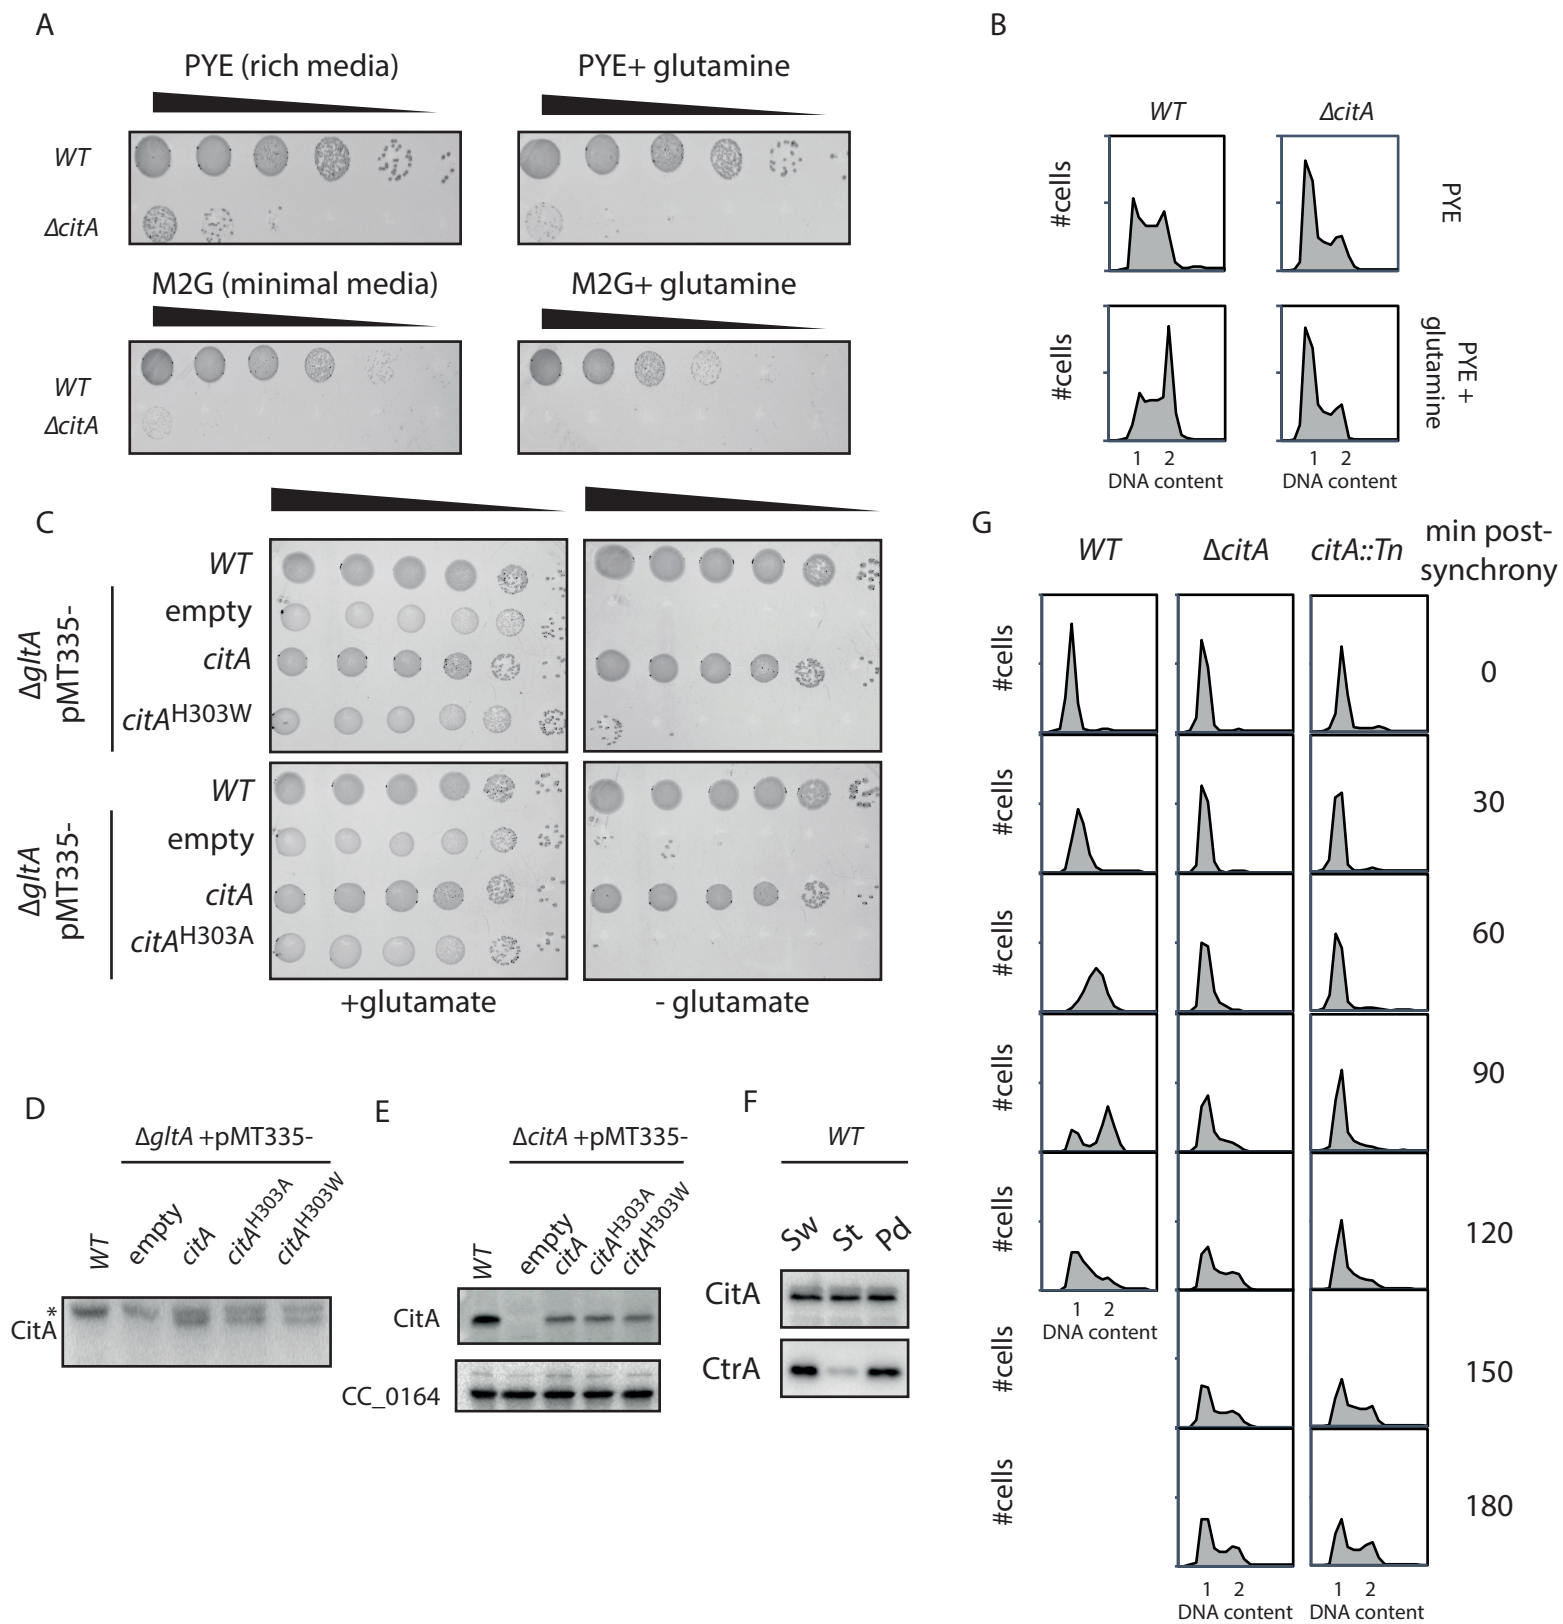

Figure 4 Supplement 1

Supplement: supp [file elife-52272-supp-v1.zip]

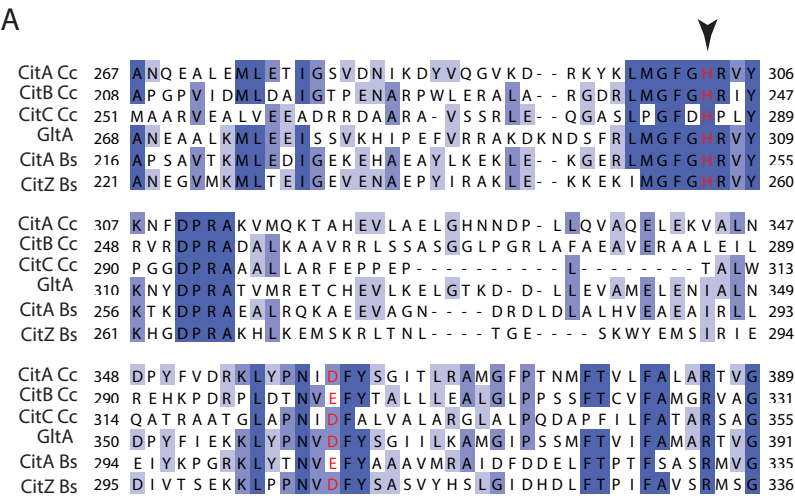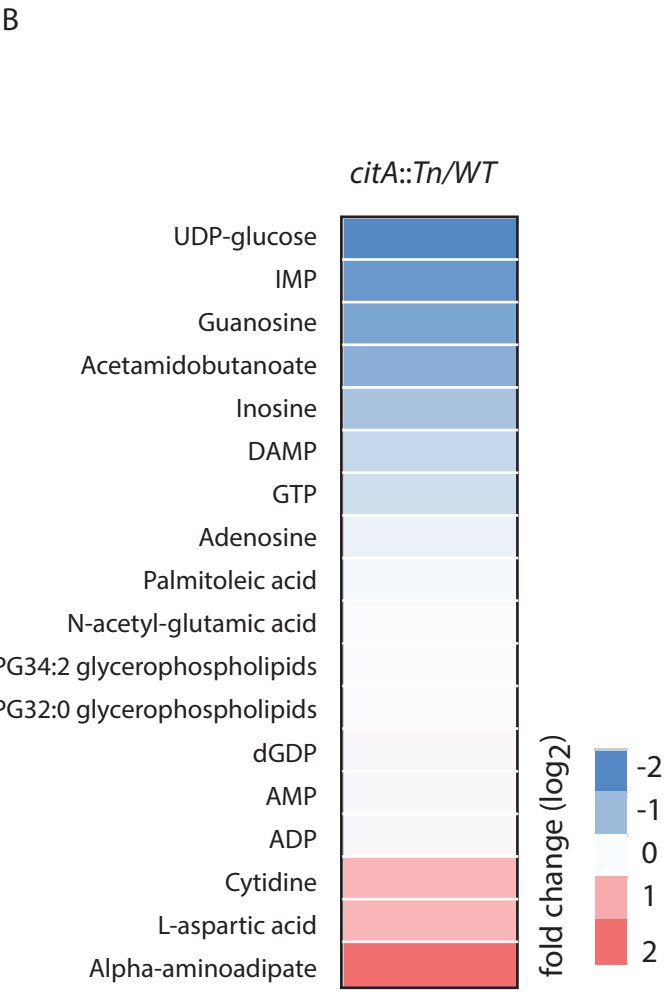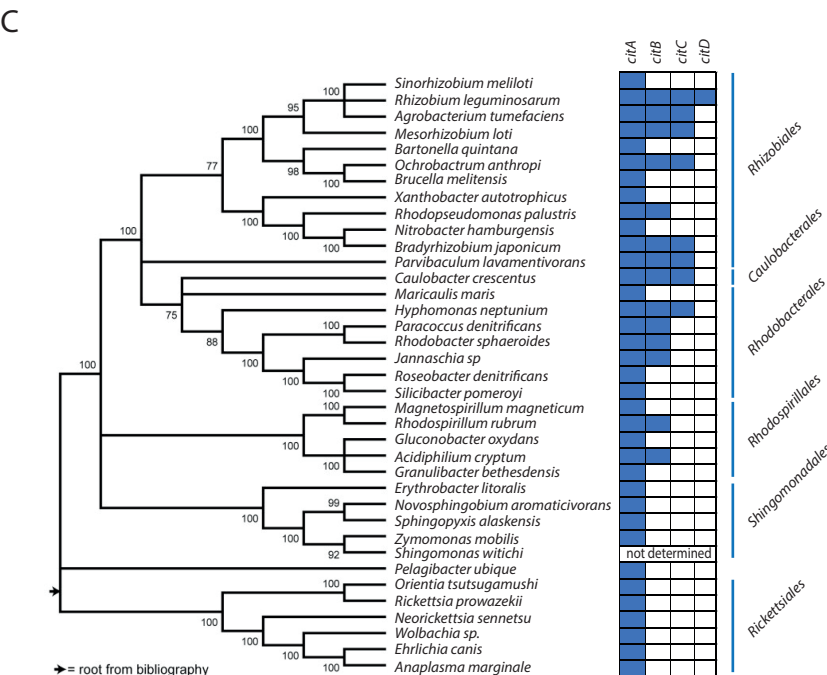

Figure 3 Supplement 1

Supplement: supp [file elife-52272-supp-v1.zip]

A

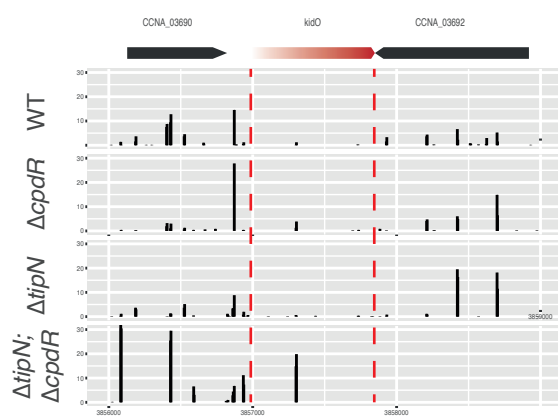

B

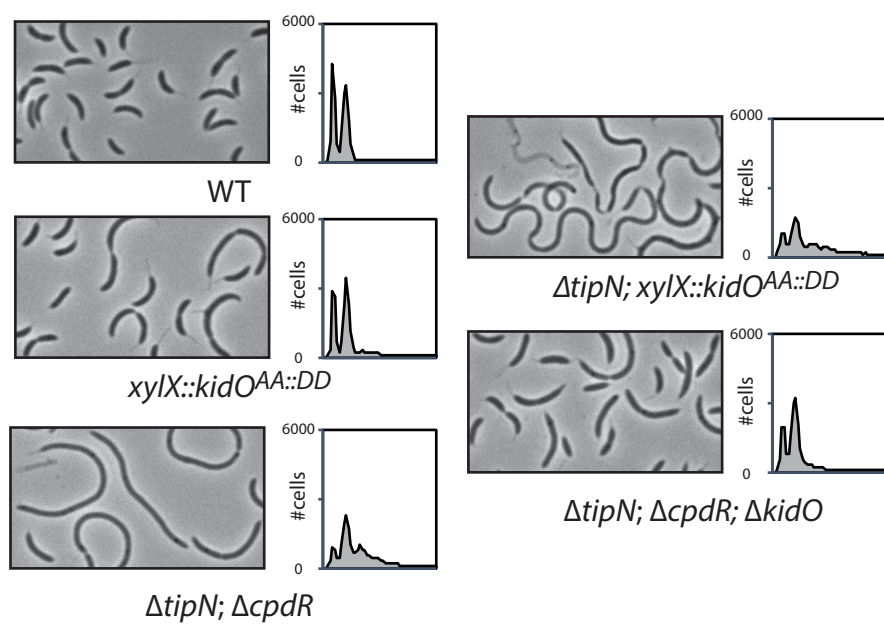

Figure 1 Supplement 2

Supplement: supp [file elife-52272-supp-v1.zip]

A

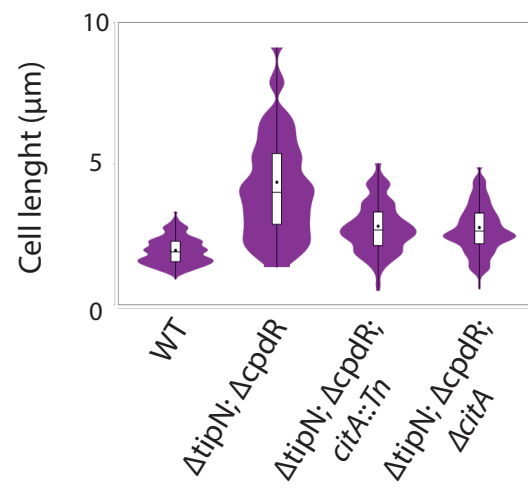

Figure 2 Supplement 1

Supplement: supp [file elife-52272-supp-v1.zip]
